# Supplementary material
Source: PubMed Central journal article supplement (PMC8287824)

**Supporting Information for**  
**Stereodivergent Alkyne Hydrofluorination Using Protic Tetrafluoroborates as**  
**Tunable Reagents**

*Rui Guo<sup>#</sup>, Xiaotian Qi<sup>#</sup>, Hengye Xiang, Paul Geaneotes, Ruihan Wang, Peng Liu\* and Yi-Ming Wang\**

*Department of Chemistry, University of Pittsburgh, Pittsburgh, Pennsylvania 15260, United States*  
*E-mail: ym.wang@pitt.edu, pengliu@pitt.edu*

**Contents**

|                                                                          |      |
|--------------------------------------------------------------------------|------|
| 1. General Information.....                                              | S2   |
| 2. Optimization of reaction conditions.....                              | S3   |
| 3. Mechanistic studies.....                                              | S4   |
| 4. DFT studies and control experiments .....                             | S11  |
| 5. Characterization data of pyridinium tetrafluoroborates .....          | S19  |
| 6. Characterization data of unreported starting materials.....           | S22  |
| 7. General procedure for hydrofluorination of alkynes.....               | S29  |
| 8. Characterization data of products .....                               | S31  |
| 9. X-ray structures of product <b>22</b> .....                           | S75  |
| 10. Cartesian coordinates (Å) and energies of optimized structures ..... | S76  |
| 11. References.....                                                      | S145 |
| 12. Copies of NMR Spectra .....                                          | S147 |

## 1. General Information

**General Reagent Information:** Anhydrous chloroform, 1,2-dichloroethane, tetrahydrofuran, and trifluorotoluene were purchased from Acros (AcroSeal packaging), Sigma Aldrich (Sure/Seal packaging), and Frontier Scientific (J&KSeal packaging), respectively, and were transferred into an argon-filled glovebox and used as received. Other dry solvents were obtained by distillation and storage over 3Å or 4Å molecular sieves. All other reagents were purchased from Oakwood, Acros, Alfa Aesar, or Sigma Aldrich and used as received. Compounds were purified by flash column chromatography using SiliCycle *SiliaFlash*® *F60* silica gel, unless otherwise indicated.

**General Analytical Information:** New compounds were characterized by <sup>1</sup>H NMR, <sup>13</sup>C NMR, <sup>19</sup>F NMR and HRMS. Copies of the <sup>1</sup>H NMR, <sup>13</sup>C NMR and <sup>19</sup>F NMR spectra can be found at the end of the Supporting Information. <sup>1</sup>H NMR, <sup>13</sup>C NMR and <sup>19</sup>F NMR spectra were recorded on Bruker 400 MHz or 500 MHz instruments. All <sup>1</sup>H NMR data are reported in δ units, parts per million (ppm), and were measured relative to the residual proton signal in the deuterated solvent at 2.50 ppm (DMSO-*d*<sub>6</sub>), 7.26 ppm (CDCl<sub>3</sub>) or 5.32 ppm (CD<sub>2</sub>Cl<sub>2</sub>). All <sup>13</sup>C NMR spectra are <sup>1</sup>H decoupled and reported in ppm relative to the solvent signal at 39.52 ppm (DMSO-*d*<sub>6</sub>), 77.00 ppm (CDCl<sub>3</sub>) or 53.84 ppm (CD<sub>2</sub>Cl<sub>2</sub>). Thin-layer chromatography (TLC) was performed on Silicycle 250 μm (analytical) or 1000 μm (preparative) silica gel plates. Compounds were visualized by irradiation with UV light, or by staining with iodine/silica gel, potassium permanganate, or phosphomolybdic acid (PMA). Yields refer to isolated compounds, unless otherwise indicated. High resolution mass spectra were recorded on a Thermo Scientific Q-Exactive mass spectrometer. NMR yield was determined by using trifluorotoluene as internal standard for <sup>19</sup>F NMR spectroscopy.

## 2. Optimization of reaction conditions

### 1. Optimization of fluorinating reagents

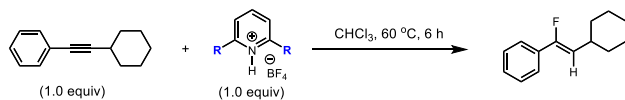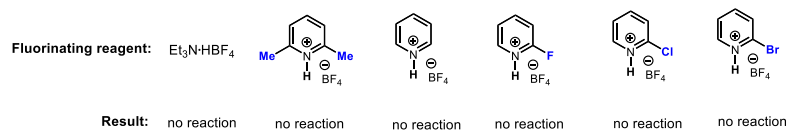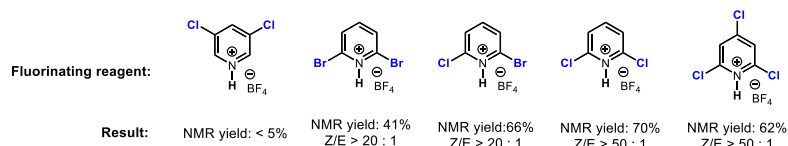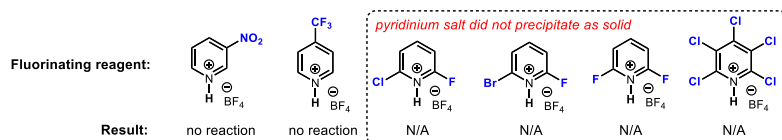

### 2. Optimization of solvent

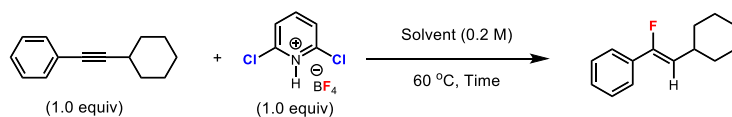

| Entry | Solvent                     | Time (h) | NMR Yield (%) | Z/E          |
|-------|-----------------------------|----------|---------------|--------------|
| 1     | THF                         | 6        | 0             | —            |
| 2     | <i>t</i> Butyl methyl ether | 6        | 0             | —            |
| 3     | Toluene                     | 6        | 21            | Z/E = 1 : 1  |
| 4     | PhCl                        | 6        | 52            | Z/E > 20 : 1 |
| 5     | PhCF <sub>3</sub>           | 6        | 53            | Z/E > 20 : 1 |
| 6     | PhCF <sub>3</sub>           | 12       | 65            | Z/E > 20 : 1 |
| 7     | CHCl <sub>3</sub>           | 6        | 70            | Z/E > 50 : 1 |
| 8     | DCE                         | 6        | 34            | Z/E > 50 : 1 |
| 9     | CH <sub>3</sub> CN          | 6        | trace         | —            |

### 3. Optimization of temperature

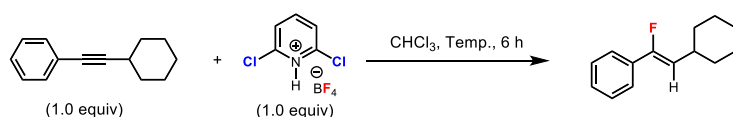

| Entry | <i>T</i> (°C) | NMR Yield (%) | <i>Z/E</i>          |
|-------|---------------|---------------|---------------------|
| 1     | 25            | trace         | <i>Z/E</i> = 1 : 5  |
| 2     | 40            | 13            | <i>Z/E</i> = 3 : 1  |
| 3     | 50            | 39            | <i>Z/E</i> > 20 : 1 |
| 4     | 60            | 70            | <i>Z/E</i> > 50 : 1 |
| 5     | 70            | 74            | <i>Z/E</i> > 50 : 1 |
| 6     | 80            | 63            | <i>Z/E</i> > 50 : 1 |

### 4. Optimization of additives

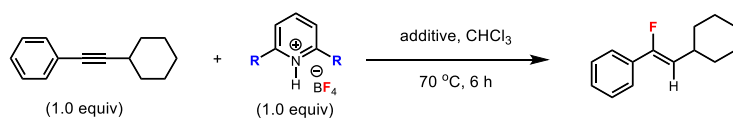

| Entry | Additive                                                | NMR Yield (%) | <i>Z/E</i>          |
|-------|---------------------------------------------------------|---------------|---------------------|
| 1     | NaBF <sub>4</sub> (1.0 eq.)                             | 80            | <i>Z/E</i> > 20 : 1 |
| 2     | LiBF <sub>4</sub> (1.0 eq.)                             | 81            | <i>Z/E</i> > 20 : 1 |
| 3     | N( <i>n</i> -Bu) <sub>4</sub> BF <sub>4</sub> (1.0 eq.) | 79            | <i>Z/E</i> > 20 : 1 |
| 4     | N(Et) <sub>4</sub> BF <sub>4</sub> (1.0 eq.)            | 77            | <i>Z/E</i> > 20 : 1 |
| 5     | LiBF <sub>4</sub> (0.5 eq.)                             | 83            | <i>Z/E</i> > 20 : 1 |
| 6     | LiBF <sub>4</sub> (0.25 eq.)                            | 82            | <i>Z/E</i> > 50 : 1 |
| 7     | LiBF <sub>4</sub> (0.1 eq.)                             | 79            | <i>Z/E</i> > 50 : 1 |

## 3. Mechanistic studies

### 3.1 Kinetic study

#### General Procedure for Initial Rate Kinetics

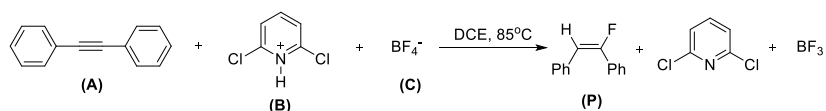

A reaction tube (13 mm × 100 mm, Fisherbrand, part # 14-959-35C) equipped with a magnetic stir bar was flame dried under vacuum. The reaction tube was cooled under argon and transferred into an



argon-filled glovebox. In the glovebox, diphenylacetylene, 2,6-dichloropyridinium tetrafluoroborate  $\text{NBu}_4\text{BF}_4$  and dry DCE were added in succession. The reaction tube was sealed and removed from the glovebox. After stirred at 85 °C for 1 h, the reaction mixture was cooled to room temperature. The resulting mixture was passed through a pad of silica gel and eluted with  $\text{CH}_2\text{Cl}_2$ . The filtrate was concentrated *in vacuo* and benzotrifluoride was added as the internal standard for subsequent quantitative  $^{19}\text{F}$ -NMR spectroscopy. In all cases, conversions were under 15% and in the initial rate kinetics regime.

**Table S1: Amounts and Volumes Used for Kinetic Experiments**

| Entry | Alkyne (A)<br>Amount (mg) | Pyridine Salt<br>Amount (mg) | $\text{NBu}_4\text{BF}_4$<br>Amount (mg) | DCE<br>Volume (uL) |
|-------|---------------------------|------------------------------|------------------------------------------|--------------------|
| 1     | 3.4                       | 5.5                          | 0                                        | 581                |
| 2     | 5.2                       | 5.5                          | 0                                        | 581                |
| 3     | 6.3                       | 5.5                          | 0                                        | 581                |
| 4     | 8.2                       | 5.5                          | 0                                        | 581                |
| 5     | 3.4                       | 5.5                          | 0                                        | 581                |
| 6     | 3.4                       | 5.5                          | 1.5                                      | 575                |
| 7     | 3.4                       | 5.5                          | 3.1                                      | 578                |
| 8     | 3.4                       | 5.5                          | 4.9                                      | 555                |
| 9     | 3.4                       | 5.5                          | 6.5                                      | 590                |
| 10    | 3.4                       | 3.2                          | 0                                        | 580                |
| 11    | 3.4                       | 5.5                          | 0                                        | 581                |
| 12    | 3.4                       | 7.8                          | 0                                        | 574                |
| 13    | 3.4                       | 9.9                          | 0                                        | 563                |

The reagent being varied is shown in red

**Table S2: Molarities of Each Reagent and Initial Rates for Each Kinetic Experiment**

| Entry | Alkyne (A)<br>/M | Cation (B)<br>/M | $\text{BF}_4^-$ (C)<br>/M | Temperature<br>/K | Initial Rate<br>/(M/s) |
|-------|------------------|------------------|---------------------------|-------------------|------------------------|
| 1     | 0.0328           | 0.0400           | 0.0400                    | 358.15            | 1.13E-06               |
| 2     | 0.0502           | 0.0400           | 0.0400                    | 358.15            | 1.56E-06               |
| 3     | 0.0608           | 0.0400           | 0.0400                    | 358.15            | 2.03E-06               |
| 4     | 0.0792           | 0.0400           | 0.0400                    | 358.15            | 2.41E-06               |
| 5     | 0.0328           | 0.0400           | 0.0400                    | 358.15            | 1.13E-06               |
| 6     | 0.0328           | 0.0400           | 0.0462                    | 358.15            | 9.72E-07               |
| 7     | 0.0328           | 0.0400           | 0.0559                    | 358.15            | 1.04E-06               |
| 8     | 0.0328           | 0.0400           | 0.0672                    | 358.15            | 1.16E-06               |
| 9     | 0.0328           | 0.0400           | 0.0729                    | 358.15            | 1.14E-06               |
| 10    | 0.0328           | 0.0234           | 0.0234                    | 358.15            | 5.25E-07               |
| 11    | 0.0328           | 0.0400           | 0.0400                    | 358.15            | 1.13E-06               |
| 12    | 0.0328           | 0.0575           | 0.0575                    | 358.15            | 1.23E-06               |
| 13    | 0.0328           | 0.0745           | 0.0745                    | 358.15            | 1.71E-06               |

The concentration being varied is shown in red

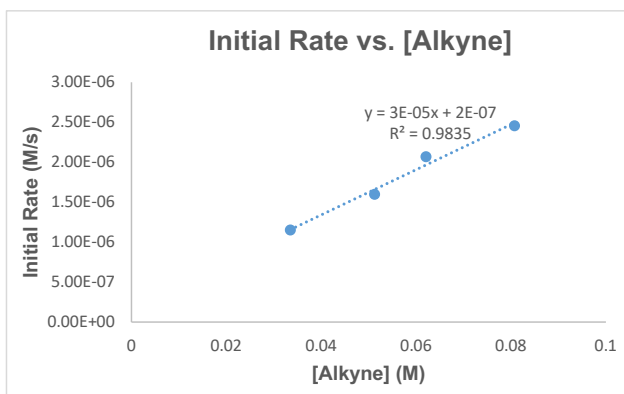

**Figure S1:** Plot of the initial rate of hydrofluorination vs. the concentration of Alkyne.

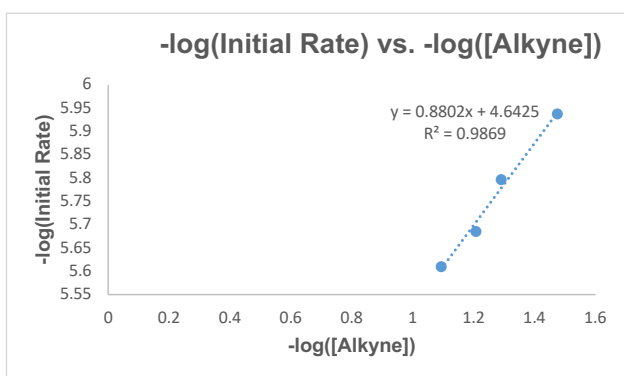

**Figure S2:** Plot of the minus logarithm of the initial rate of hydrofluorination vs. the minus logarithm of the concentration of alkyne.

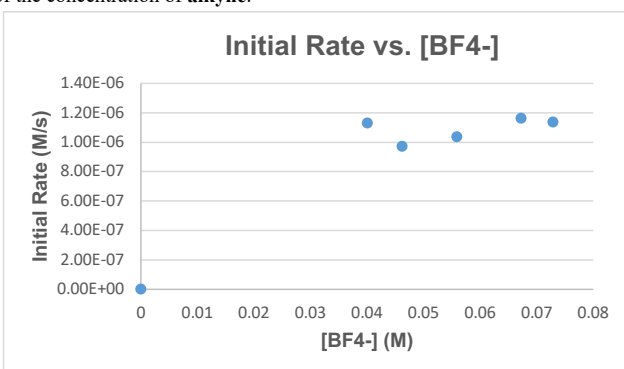

**Figure S3:** Plot of the initial rate of hydrofluorination vs. the concentration of  $\text{BF}_4^-$ .

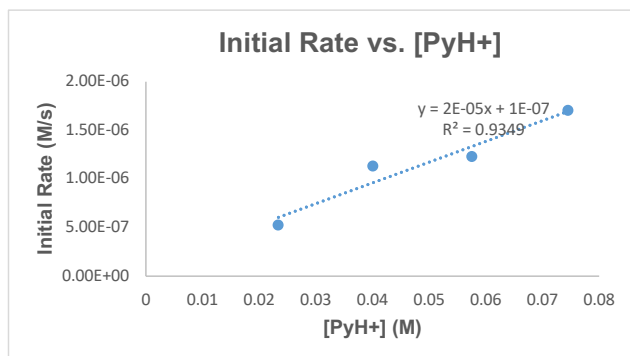

**Figure S4:** Plot of the initial rate of hydrofluorination vs. the concentration of 2,6-dichloropyridine cation.

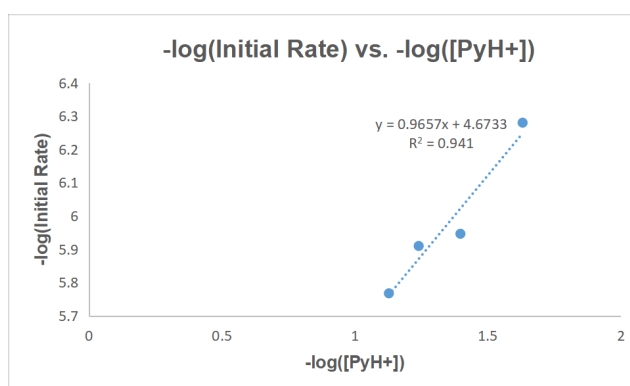

**Figure S5:** Plot of the minus logarithm of the initial rate of hydrofluorination vs. the minus logarithm of the concentration of 2,6-dichloropyridine cation.

Although pyridinium concentration and tetrafluoroborate concentration could not be varied independently, the rate order of tetrafluoroborate was ascertained to be zero by addition of tetrabutylammonium tetrafluoroborate as a source of excess tetrafluoroborate (Figure S3).

### 3.2 Stereoselectivity study

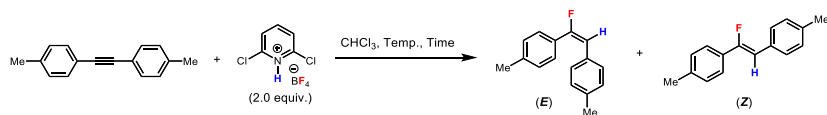

A reaction tube (13 mm  $\times$  100 mm, Fisherbrand, part # 14-959-35C) equipped with a magnetic stir bar was flame dried under vacuum. The reaction tube was cooled under argon and transferred into an argon-filled glovebox. In the glovebox, 2,6-dichloropyridinium tetrafluoroborate (0.4 mmol, 94 mg, 2.0 equiv), 1,2-Bis(4-methylphenyl)acetylene (0.2 mmol, 41 mg, 1.0 equiv) and dry  $\text{CHCl}_3$  (1.0 mL) were added in succession. The reaction tube was sealed and removed from the glovebox. After stirring at 70  $^\circ\text{C}$  for the given reaction time, the reaction mixture was cooled to room temperature. The resulting mixture was passed through a pad of silica gel and eluted with  $\text{CH}_2\text{Cl}_2$ . The filtrate was concentrated *in vacuo* and benzo-trifluoride was added as the internal standard for subsequent quantitative  $^{19}\text{F}$ -NMR spectroscopy.

| Entry | Temp./ $^\circ\text{C}$ | Time/h | E/Z     | Yield/% | E/%   | Z/%   |
|-------|-------------------------|--------|---------|---------|-------|-------|
| 1     | 70                      | 1      | 6 : 1   | 23      | 19.71 | 3.29  |
| 2     | 70                      | 2      | 2.3 : 1 | 30      | 20.91 | 9.09  |
| 3     | 70                      | 3      | 1.6 : 1 | 37      | 22.77 | 14.23 |
| 4     | 70                      | 4      | 1.3 : 1 | 43      | 24.30 | 18.70 |
| 5     | 70                      | 5      | 1 : 1   | 49      | 24.50 | 24.50 |
| 6     | 70                      | 6      | 1 : 1.2 | 53      | 24.09 | 28.91 |
| 7     | 70                      | 7      | 1 : 1.4 | 58      | 24.17 | 33.83 |
| 8     | 70                      | 8      | 1 : 1.6 | 61      | 23.46 | 37.54 |
| 9     | 70                      | 9      | 1 : 1.8 | 59      | 21.07 | 37.93 |
| 10    | 70                      | 10     | 1 : 2.1 | 55      | 17.74 | 37.26 |
| 11    | 70                      | 11     | 1 : 2.4 | 51      | 15.00 | 36.00 |
| 12    | 70                      | 12     | 1 : 2.4 | 45      | 12.16 | 32.84 |

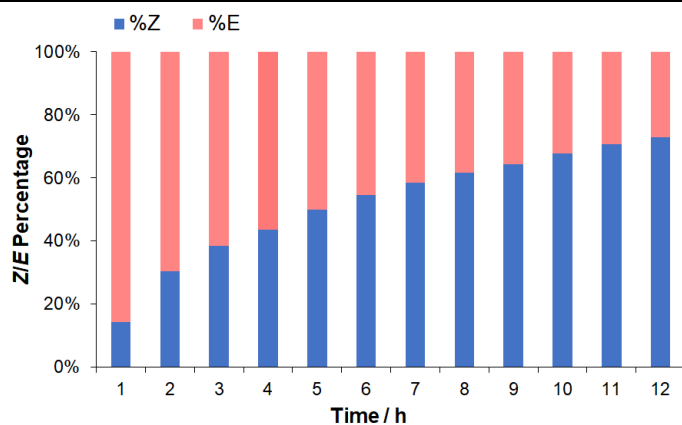

Figure S6: The *Z/E*-ratio of the hydrofluorination product over the course of reaction time.

A reaction tube (13 mm × 100 mm, Fisherbrand, part # 14-959-35C) equipped with a magnetic stir bar was flame dried under vacuum. The reaction tube was cooled under argon and transferred into an argon-filled glovebox. In the glovebox, 2,6-dichloropyridinium tetrafluoroborate (0.4 mmol, 94 mg, 2.0 equiv), 1,2-Bis(4-methylphenyl)acetylene (0.2 mmol, 41 mg, 1.0 equiv) and dry CHCl<sub>3</sub> (1.0 mL) were added in succession. The reaction tube was sealed and removed from the glovebox. After stirring at the given temperature for 12 h, the reaction mixture was cooled to room temperature. The resulting mixture was passed through a pad of silica gel and eluted with CH<sub>2</sub>Cl<sub>2</sub>. The filtrate was concentrated *in vacuo* and benzonitrile was added as the internal standard for subsequent quantitative <sup>19</sup>F-NMR spectroscopy.

| Entry | Temp./ °C | Time/h | E/Z     | Yield/% | E/%   | Z/%   |
|-------|-----------|--------|---------|---------|-------|-------|
| 1     | 30        | 12     | 99 : 1  | 5       | 4.95  | 0.05  |
| 2     | 40        | 12     | 8 : 1   | 22      | 19.56 | 2.44  |
| 3     | 50        | 12     | 2.6 : 1 | 40      | 28.89 | 11.11 |
| 4     | 60        | 12     | 1 : 1.6 | 50      | 19.23 | 30.77 |
| 5     | 70        | 12     | 1 : 2.7 | 45      | 12.16 | 32.84 |
| 6     | 80        | 12     | 1 : 20  | 43      | 2.05  | 40.95 |
| 7     | 90        | 12     | 1 : 99  | 36      | 0.36  | 35.64 |

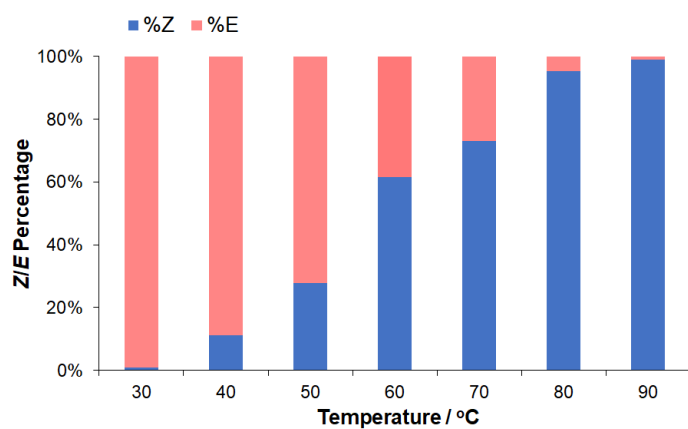

**Figure S7:** The *Z/E*-ratio of the hydrofluorination product over the course of reaction temperature.

These mechanistic studies all support that the C-F bond formation is a reversible step, and the generation of *E*-alkene in the hydrofluorination of aryl-substituted phenylacetylene is kinetically controlled while the formation of *Z*-alkene is thermodynamically controlled.

### 3.3 Hammett analysis for *para*-substituted alkynes

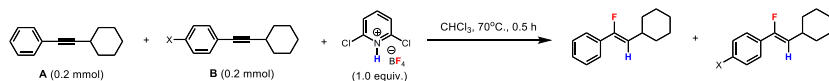

A reaction tube (13 mm × 100 mm, Fisherbrand, part # 14-959-35C) equipped with a magnetic stir bar was flame dried under vacuum. The reaction tube was cooled under argon and transferred into an argon-filled glovebox. In the glovebox, 2,6-dichloropyridinium tetrafluoroborate (0.2 mmol, 47 mg, 1.0 equiv), dry  $\text{CHCl}_3$  (1.0 mL), (cyclohexylethynyl)benzene **A** (0.2 mmol, 37 mg) and substituted alkyne **B** (0.2 mmol) were added in succession. The reaction tube was sealed and removed from the glovebox. After stirred at 70 °C for 30 min, the reaction mixture was cooled to room temperature. The resulting mixture was passed through a pad of silica gel and eluted with  $\text{CH}_2\text{Cl}_2$ . The filtrate was concentrated *in vacuo* and benzotrifluoride was added as the internal standard for subsequent quantitative  $^{19}\text{F}$ -NMR spectroscopy.

| R              | $\sigma_p$ | $k_x/k_H$ | $\log(k_x/k_H)$ |
|----------------|------------|-----------|-----------------|
| 4- <i>t</i> Bu | -0.197     | 5.120     | 0.709           |
| 4-Me           | -0.170     | 4.001     | 0.602           |
| H              | 0.000      | 1.000     | 0.000           |
| 4-F            | 0.062      | 0.833     | -0.079          |
| 4-Cl           | 0.227      | 0.205     | -0.689          |
| 4-Br           | 0.232      | 0.143     | -0.845          |

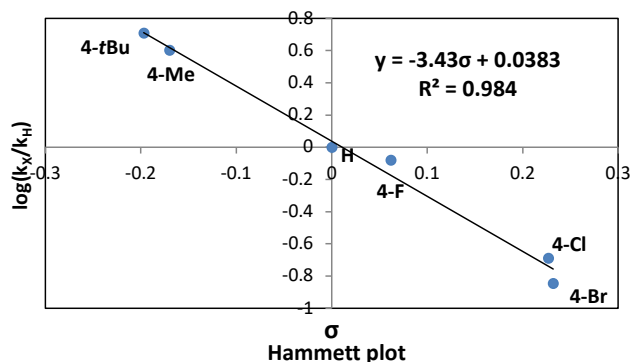

Figure S8: Hammett-plot analysis for *para*-substituted (cyclohexylethynyl)benzene.

### 3.4 Dielectric constant study

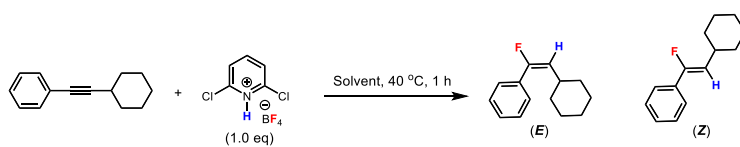

A reaction tube (13 mm × 100 mm, Fisherbrand, part # 14-959-35C) equipped with a magnetic stir bar was flame dried under vacuum. The reaction tube was cooled under argon and transferred into an argon-filled glovebox. In the glovebox, 2,6-dichloropyridinium tetrafluoroborate (0.2 mmol, 47 mg, 1.0 equiv), (cyclohexylethynyl)benzene (0.2 mmol, 37 mg, 1.0 equiv) and corresponding dry solvent (1.0 mL) were added in succession. The reaction tube was sealed and removed from the glovebox. After stirring at 40 °C for 1 h, the reaction mixture was cooled to room temperature. The resulting mixture was passed through a pad of silica gel and eluted with CH<sub>2</sub>Cl<sub>2</sub>. The filtrate was concentrated *in vacuo* and benzotrifluoride was added as the internal standard for subsequent quantitative <sup>19</sup>F-NMR spectroscopy.

| Solvent           | $\epsilon$ | <i>E/Z</i> |
|-------------------|------------|------------|
| CCl <sub>4</sub>  | 2.23       | NR         |
| Toluene           | 2.38       | 20 : 1     |
| CHCl <sub>3</sub> | 4.7        | 3 : 1      |
| DCM               | 8.9        | 1 : 2.5    |
| DCE               | 10.37      | 1 : 16.2   |

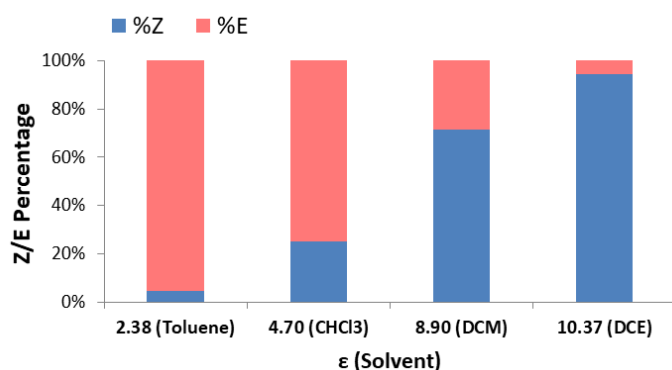

#### 4. DFT studies and control experiments

##### Computational methods

All density functional theory (DFT) calculations were performed using Gaussian 16<sup>21</sup> software package on Pitt CRC and XSEDE<sup>22</sup> supercomputers. Geometries were optimized in chloroform (CHCl<sub>3</sub>,  $\epsilon = 4.7$ ) with the SMD solvation model<sup>23</sup> using the M06-2X<sup>24</sup> functional and a basis set of 6-31+G(d). Vibrational frequency calculations were performed for all the stationary points to confirm if each optimized structure is a local minimum or a transition state structure. Intrinsic reaction coordinate (IRC) calculations have demonstrated that the transition state connects two corresponding intermediates along

the reaction coordinate. Truhlar's quasi-harmonic corrections<sup>25</sup> were applied for entropy calculations with a frequency cut-off of 100 cm<sup>-1</sup> using the GoodVibes<sup>26</sup> program. Single point energies were calculated using M06-2X and 6-311+G(d,p) basis set in CHCl<sub>3</sub> using the SMD solvation model.

Unless otherwise noted, all the energies discussed in the main text and SI were calculated at the M06-2X/6-311+G(d,p)/SMD(chloroform)//M06-2X/6-31+G(d)/SMD(chloroform) level of theory. Because dichloroethane (DCE,  $\epsilon = 10.1$ ) was also used as the solvent in experiment, the free energy profile of the hydrofluorination of diphenylacetylene was also calculated in DCE using the same basis set and solvation model to investigate the solvent effect. In these calculations, which are summarized in Figure S15, all structures were optimized in DCE and energies were calculated at the M06-2X/6-311+G(d,p)/SMD(DCE)//M06-2X/6-31+G(d)/SMD(DCE) level of theory.



### Free energy profiles of disfavored pathways of the hydrofluorination of 1,2-diphenylacetylene **101**

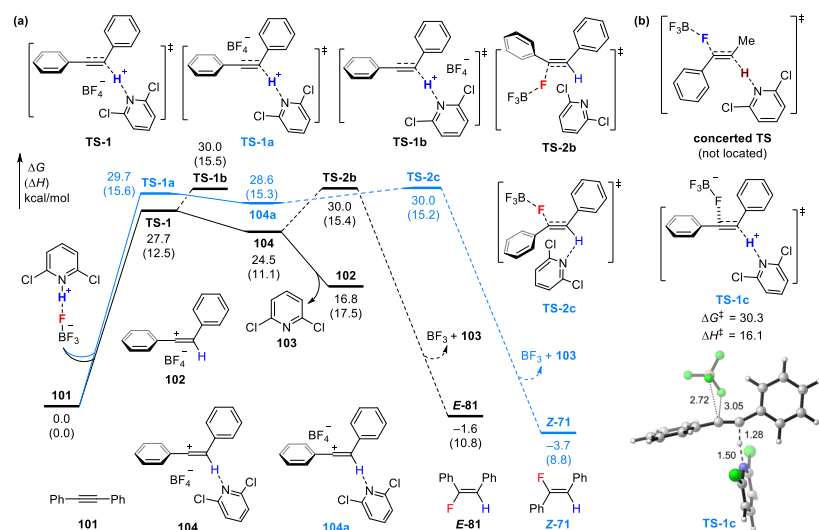

**Figure S9.** Free energy profiles of disfavored pathways of the hydrofluorination of 1,2-diphenylacetylene **101**. All energies were calculated at the M06-2X/6-311+G(d,p)/SMD(chloroform)//M06-2X/6-31+G(d)/SMD(chloroform) level of theory.

In the computational study of hydrofluorination of 1,2-diphenylacetylene **101**, two protonation transition states were located (**TS-1** and **TS-1a**), in which the tetrafluoroborate anion is *syn* and *anti* to the pyridinium, respectively. Besides, another possible conformer of **TS-1** was located as **TS-1b**. This transition state has a higher activation free energy than **TS-1** by 2.3 kcal/mol due to the less stabilizing electrostatic interaction. Therefore, this transition state structure could be rule out. After the protonation transition states, ion-pair intermediates **104** and **104a**, which contain the hydrogen bonding interaction between 2,6-dichloropyridine and vinyl hydrogen, could be located in calculations (Fig. S9a). The dissociation of 2,6-dichloropyridine from these two intermediates is found to be exergonic. The formation of intermediates **102** and **102a** (Fig. 1) are thus thermodynamically favored. Besides the fluorination transition states from **102** and **102a** (Fig. 1), **TS-2b** and **TS-2c** were also located, which involve fluorination from the 2,6-dichloropyridine-bound ion pairs **104** and **104a**. However, these transition states are kinetically disfavored because of the entropy loss caused by 2,6-dichloropyridine complexation. Therefore, the fluorination of vinyl cation occurs after the dissociation of 2,6-dichloropyridine.

The concerted hydrofluorination mechanism is also considered in mechanistic studies. Nevertheless, all attempts toward locating the concerted hydrofluorination transition state have failed. An isomer of the *anti*-protonation transition state **TS-1c** (Fig. S9b) was located, which involves a shorter C-F bond distance (2.72 Å) than those in **TS-1** and **TS-1a** (3.00 and 2.80 Å, respectively).

**TS-1c** has a higher energy barrier than those of **TS-1a** and **TS-1**. IRC calculations showed that **TS-1c** also leads to the formation of  $\text{BF}_4^-/\text{vinyl cation}$  intermediate instead of the hydrofluorination product. Therefore, the higher energy **TS-1c** is still a stepwise protonation transition state. Because the experimental Hammett analysis revealed a  $\rho$  value of  $-3.43$  and kinetic studies revealed first-order kinetics in alkyne and  $\text{H}^+$  and zero-order kinetics in excess  $\text{BF}_4^-$ , which are consistent with the stepwise protonation-fluorination mechanism, the concerted hydrofluorination mechanism could be ruled out.

### Free energy profiles of the hydrofluorination of cyclohexylphenylacetylene and methylphenylacetylene

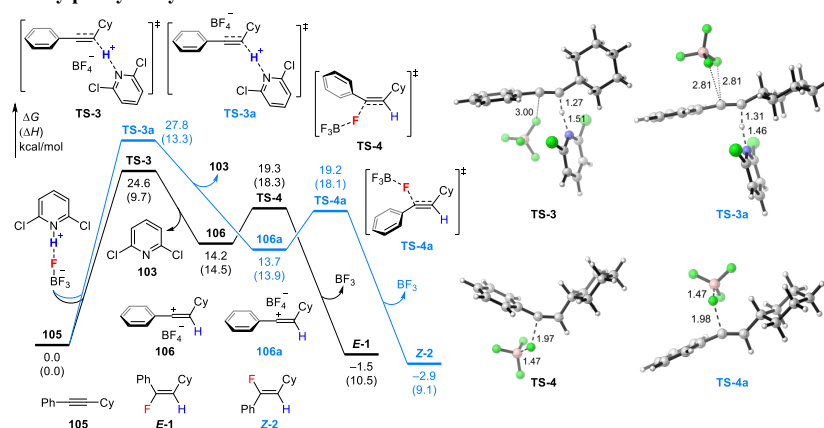

**Figure S10.** Reaction energy profiles of the hydrofluorination of cyclohexylphenylacetylene **105** with 2,6-dichloropyridinium tetrafluoroborate. All energies were calculated at the M06-2X/6-311+G(d,p)/SMD(chloroform)//M06-2X/6-31+G(d)/SMD(chloroform) level of theory.

Computational results suggested that the hydrofluorination of cyclohexyl and methyl-substituted phenylacetylene with 2,6-dichloropyridinium tetrafluoroborate also occurs through a stepwise  $\text{A}_{\text{E}2}$ -type protonation-fluorination mechanism with a  $\text{BF}_4^-/\text{vinyl cation}$  ion-pair intermediate (Fig. S10 and S11). The intrinsic reaction coordinate (IRC) calculations have confirmed that protonation transition states **TS-3**, **TS-3a**, **TS-5**, and **TS-5a** lead to  $\text{BF}_4^-/\text{vinyl cation}$  ion-pair intermediates rather than the hydrofluorination products. The protonation is still the rate-determining step and the fluorination of vinyl cation is a facile process. The protonation step still favors *syn*-protonation that leads to ion pairs **106** and **108**. The *Z*-vinyl fluoride products are thermodynamically more stable than the corresponding *E*-isomer. The  $\text{BF}_3$ -mediated *E*-to-*Z* vinyl fluoride isomerization is verified by control experiments with fluorinating reagent **F** and  $\text{Et}_2\text{O} \cdot \text{BF}_3$  (Fig. S12). Therefore, under thermodynamically controlled conditions, high *Z*-selectivity is observed for the hydrofluorination of cyclohexyl and methyl-substituted phenylacetylene in the experiment.

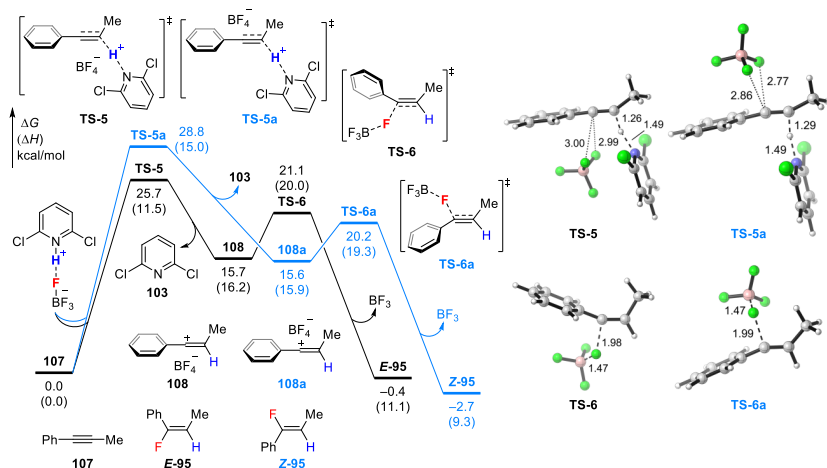

**Figure S11.** Reaction energy profiles of the hydrofluorination of methyl-substituted phenylacetylene **107** with 2,6-dichloropyridinium tetrafluoroborate. All energies were calculated at the M06-2X/6-311+G(d,p)/SMD(chloroform)//M06-2X/6-31+G(d)/SMD(chloroform) level of theory.

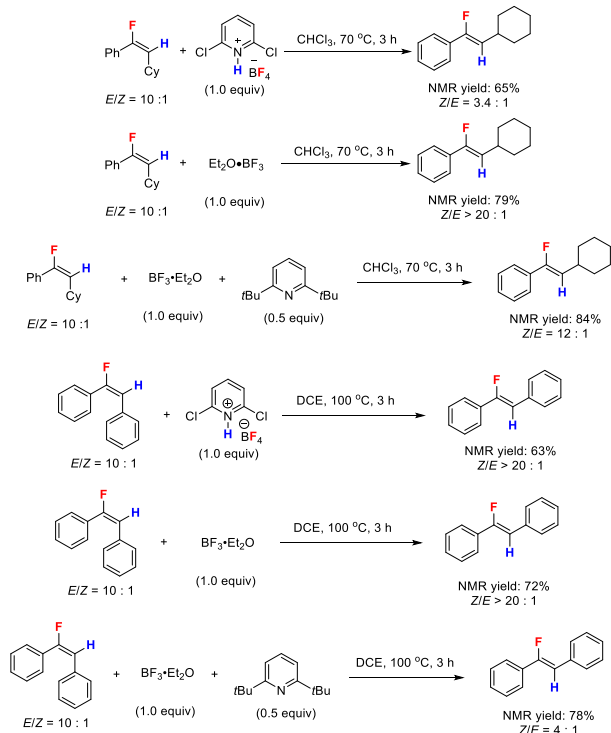

**Figure S12.** *E/Z*-isomerization of vinyl fluoride using fluorinating reagent **F** and Et<sub>2</sub>O•BF<sub>3</sub>.

We summarized that a relatively bulky alkyne substituent (*e.g.* R = Ph or Cy) could suppress the isomerization from ion-pair **I** to **II** ( $k_3$ ) and the *Z*-selective fluorination ( $k_4$ ) by steric effects (see Scheme 4D in main text). As shown in Figure S10, the *E*-selective fluorination (via **TS-4**) and *Z*-selective fluorination (via **TS-4a**) has comparable energy barriers. While in Figure S11, the *E*-selective fluorination (via **TS-6**) has a slightly higher energy barrier than that of *Z*-selective fluorination (via **TS-6a**). Combined with the computational results in Fig. 1 (hydrofluorination of 1,2-diphenylacetylene), we found that the *Z*-selective fluorination is slower than the *E*-selective fluorination in the cases of Ph and Cy substituted phenylacetylene.

Moreover, control experiments with different alkynes were performed under kinetic hydrofluorination condition (lower temperature) to study the substituent effects on the *E/Z*-selectivity. As shown in Figure S13, the *E*-product ratios generated from the hydrofluorination of **101** and **105** (Fig. S13a and S13b) are higher than that of **107** (Fig. S13c), which is consistent with the hypothesis that the isomerization rate ( $k_3$ ) is faster with the methyl-substituted vinyl cation ion pair. Besides, the comparison of solvents in Figure S13a indicates that less polar solvent (chloroform) could enhance the *E*-selectivity. In summary, these computational and experimental studies show that bulkier alkyne substituents and less polar solvent in this hydrofluorination reaction could enhance the kinetic *E*-selectivity.

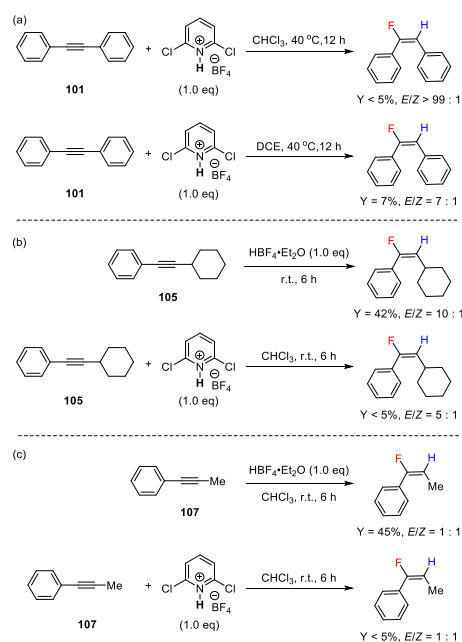

**Figure S13.** Comparison of *E/Z*-alkene ratios for different alkynes under kinetic hydrofluorination conditions.

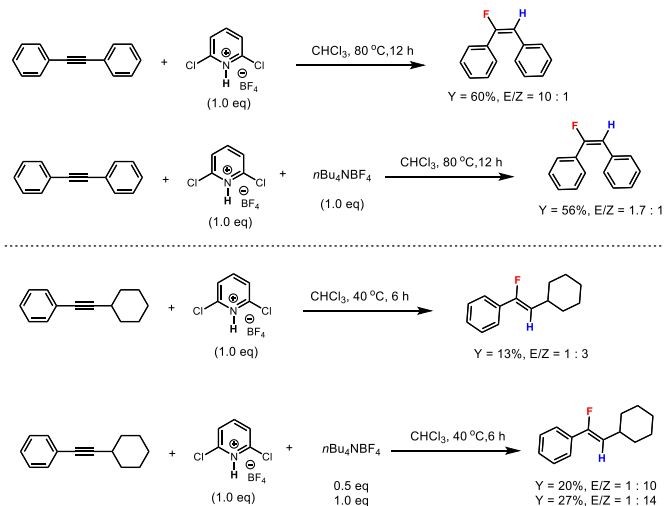

**Figure S14.** Comparison of *E/Z*-alkene ratios for adding excess  $\text{BF}_4^-$  source conditions.

Excess  $\text{BF}_4^-$  was also found to favor formation of the *Z*-isomer (Fig. S14), an effect which may be ascribed to increased availability of  $\text{BF}_4^-$  for *anti*-attack or a change in the solvent polarity due to higher ionic content.

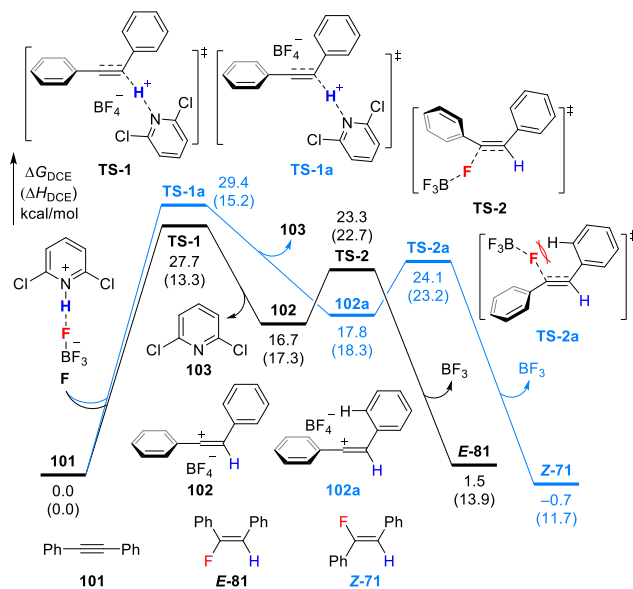

**Figure S15.** Reaction energy profiles of the hydrofluorination of 1,2-diphenylacetylene **101** with 2,6-dichloropyridinium tetrafluoroborate calculated in DCE. All energies were calculated at the

M06-2X/6-311+G(d,p)/SMD(DCE)//M06-2X/6-31+G(d)/SMD(DCE) level of theory.

In experiment (Table 2), high *Z*-selectivity was obtained for the hydrofluorination of 1,2-diphenylacetylene **101** in a polar solvent (DCE, condition D), while the same reaction in a less polar solvent (chloroform, condition C) favors the *E*-product. We summarized that polar solvent could promote the *E*-to-*Z* isomerization and thus enhance the *Z*-selectivity. We surmised that the more polar solvent (DCE) promotes the *E*-to-*Z* isomerization and thus favors the formation of the *Z*-product under thermodynamic control. To study the solvent effect, free energy profiles of the hydrofluorination of 1,2-diphenylacetylene **101** with 2,6-dichloropyridinium tetrafluoroborate were calculated in both chloroform (Fig. 1) and in DCE (Fig. S15). The reactions in DCE and chloroform occur via the same mechanism and have the same kinetic selectivity that favors *E*-products when reactions are under kinetic control. The overall hydrofluorination reaction in DCE was found to be less exothermic than in chloroform. Although the formation of the thermodynamic product **Z-71** is only exergonic by 0.7 kcal/mol in DCE, the BF<sub>3</sub> byproduct is expected to be stabilized by coordination with a Lewis base. Our calculations indicate that the complexation of BF<sub>3</sub> with H<sub>2</sub>O is highly exothermic. Although water was not added to the experimental system, we expect that the trace amount of water in DCE or other Lewis basic species under the experimental conditions will stabilize the BF<sub>3</sub> byproduct and push the equilibrium towards the product **Z-71**.

It is noteworthy that the reverse reaction of **E-81** to generate the vinyl cation **102** has a smaller energy barrier in DCE ( $\Delta G^\ddagger = 21.8$  kcal/mol) than that in chloroform (see Fig. 1,  $\Delta G^\ddagger = 23.6$  kcal/mol). Therefore, our computational studies suggest that the *E*-to-*Z* isomerization in DCE occurs faster than that in chloroform, which is consistent with the experimental results that polar solvent could increase the *Z*-selectivity in the hydrofluorination of alkynes.

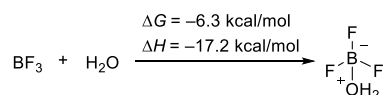

**Figure S16.** Calculated free energy for the complexation of BF<sub>3</sub> with H<sub>2</sub>O. All energies were calculated at the M06-2X/6-311+G(d,p)/SMD(DCE)//M06-2X/6-31+G(d)/SMD(DCE) level of theory.

Several mechanisms for the isomerization of vinyl fluoride were considered besides the reverse fluorination of the vinyl fluoride to regenerate the vinyl cation ion pair intermediate. Figure S17 shows an alternative isomerization pathway, which involves the protonation of vinyl fluoride **E-81** with 2,6-dichloropyridinium tetrafluoroborate (**F**) and the deprotonation of alkyl cation intermediate **102b**. This mechanism has an activation free energy of 27.2 kcal/mol, which is higher than that in the reaction of **E-81** with BF<sub>3</sub> (via **TS-2**,  $\Delta G^\ddagger = 23.6$  kcal/mol) by 3.6 kcal/mol. Therefore, this *E/Z*-isomerization mechanism is less likely.

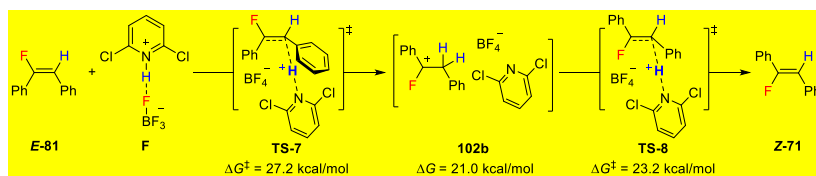

Commented [LP1]: Yiming, can you confirm the following sentence is okay

**Figure S17.** An alternative mechanism for the isomerization between *E*-81 and *Z*-71. All energies are with respect to *E*-81 and F.

## 5. Characterization data of pyridinium tetrafluoroborates

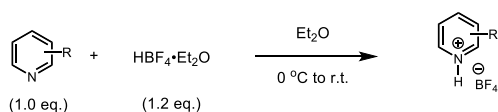

To a solution of the corresponding pyridine (50 mmol, 1.0 equiv) in dry Et<sub>2</sub>O (60 mL) was added a solution of HBF<sub>4</sub> in Et<sub>2</sub>O (54 wt %, 8.0 mL, 60 mmol, 1.2 equiv) at 0 °C to give a white precipitate. After the mixture was allowed to reach room temperature, the solid was collected by filtration, the solid was washed twice with Et<sub>2</sub>O and then dried under vacuum.

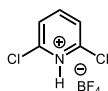

White solid (10.8 g, 92%)

<sup>1</sup>H NMR (500 MHz, DMSO) δ 14.02 (s, 1H), 7.92 (t, *J* = 7.9 Hz, 1H), 7.56 (d, *J* = 7.9 Hz, 2H).

<sup>13</sup>C NMR (126 MHz, DMSO) δ 149.3, 142.9, 123.8.

<sup>19</sup>F NMR (471 MHz, DMSO) δ -148.11 (s), -148.16 (s).

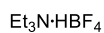

White solid (9.0 g, 95%)

<sup>1</sup>H NMR (500 MHz, DMSO) δ 8.82 (s, 1H), 3.10 (qd, *J* = 7.3, 4.8 Hz, 6H), 1.17 (t, *J* = 7.3 Hz, 9H).

<sup>13</sup>C NMR (126 MHz, DMSO) δ 45.8, 8.6.

<sup>19</sup>F NMR (471 MHz, DMSO) δ -148.32 (s), -148.37 (s).

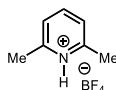

White solid (9.4 g, 96%)

<sup>1</sup>H NMR (300 MHz, DMSO) δ 15.21 (s, 1H), 8.36 (t, *J* = 7.9 Hz, 1H), 7.73 (d, *J* = 7.9 Hz, 2H), 2.69 (s, 6H).

<sup>13</sup>C NMR (126 MHz, DMSO) δ 153.0, 145.6, 124.6, 19.2.

<sup>19</sup>F NMR (471 MHz, DMSO) δ -148.22 (s), -148.28 (s).

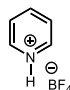

White solid (7.5 g, 90%)

<sup>1</sup>H NMR (500 MHz, DMSO) δ 15.12 (s, 1H), 8.96 – 8.89 (m, 2H), 8.62 (tt, *J* = 7.9, 1.5 Hz, 1H), 8.08 (dd, *J* = 7.7, 6.7 Hz, 2H).

$^{13}\text{C}$  NMR (126 MHz, DMSO)  $\delta$  146.4, 142.2, 127.3.

$^{19}\text{F}$  NMR (471 MHz, DMSO)  $\delta$  -148.16 (s), -148.22 (s).

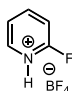

White solid (8.0 g, 86%)

$^1\text{H}$  NMR (500 MHz, DMSO)  $\delta$  12.96 (s, 1H), 8.27 – 8.19 (m, 1H), 8.02 – 7.93 (m, 1H), 7.37 – 7.29 (m, 1H), 7.15 (dd,  $J$  = 8.3, 2.5 Hz, 1H).

$^{13}\text{C}$  NMR (126 MHz, DMSO)  $\delta$  163.2 (d,  $J_{\text{C-F}}$  = 235.5 Hz), 147.8 (d,  $J_{\text{C-F}}$  = 14.6 Hz), 142.3 (d,  $J_{\text{C-F}}$  = 7.9 Hz), 122.2 (d,  $J_{\text{C-F}}$  = 4.0 Hz), 109.8 (d,  $J_{\text{C-F}}$  = 37.0 Hz).

$^{19}\text{F}$  NMR (471 MHz, DMSO)  $\delta$  -68.11 (s, 1F), -148.08 (s), -148.14 (s).

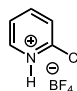

White solid (9.0 g, 90%)

$^1\text{H}$  NMR (500 MHz, DMSO)  $\delta$  13.98 (s, 1H), 8.40 (ddd,  $J$  = 4.8, 2.0, 0.6 Hz, 1H), 7.85 (ddd,  $J$  = 8.0, 7.5, 2.0 Hz, 1H), 7.49 (dt,  $J$  = 8.1, 0.7 Hz, 1H), 7.40 (ddd,  $J$  = 7.4, 4.9, 0.9 Hz, 1H).

$^{13}\text{C}$  NMR (126 MHz, DMSO)  $\delta$  150.4, 150.1, 140.1, 124.6, 123.3.

$^{19}\text{F}$  NMR (471 MHz, DMSO)  $\delta$  -148.08 (s), -148.13 (s).

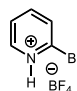

White solid (10.7 g, 87%)

$^1\text{H}$  NMR (500 MHz, DMSO)  $\delta$  14.21 (s, 1H), 8.38 (ddd,  $J$  = 4.8, 2.0, 0.6 Hz, 1H), 7.80 – 7.72 (m, 1H), 7.64 (dt,  $J$  = 8.1, 0.8 Hz, 1H), 7.44 (ddd,  $J$  = 7.4, 4.8, 1.0 Hz, 1H).

$^{13}\text{C}$  NMR (126 MHz, DMSO)  $\delta$  150.6, 141.5, 139.8, 128.4, 123.6.

$^{19}\text{F}$  NMR (471 MHz, DMSO)  $\delta$  -148.09 (s), -148.14 (s).

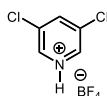

White solid (10.9 g, 93%)

$^1\text{H}$  NMR (500 MHz, DMSO)  $\delta$  13.94 (s, 1H), 8.61 (d,  $J$  = 2.1 Hz, 2H), 8.23 (t,  $J$  = 2.1 Hz, 1H).

$^{13}\text{C}$  NMR (126 MHz, DMSO)  $\delta$  146.8, 136.0, 131.7.

$^{19}\text{F}$  NMR (471 MHz, DMSO)  $\delta$  -148.07 (s), -148.12 (s).

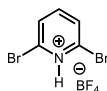

White solid (14.8 g, 92%)



**<sup>1</sup>H NMR** (500 MHz, DMSO)  $\delta$  13.52 (s, 1H), 7.73 – 7.70 (m, 3H).

**<sup>13</sup>C NMR** (126 MHz, DMSO)  $\delta$  142.3, 140.1, 127.8.

**<sup>19</sup>F NMR** (471 MHz, DMSO)  $\delta$  -148.12 (s), -148.17 (s).

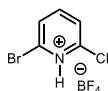

White solid (11.6 g, 83%)

**<sup>1</sup>H NMR** (500 MHz, DMSO)  $\delta$  12.94 (s, 1H), 7.82 (t,  $J$  = 7.8 Hz, 1H), 7.72 – 7.68 (m, 1H), 7.62 – 7.57 (m, 1H).

**<sup>13</sup>C NMR** (126 MHz, DMSO)  $\delta$  149.4, 142.6, 139.9, 127.5, 124.0.

**<sup>19</sup>F NMR** (471 MHz, DMSO)  $\delta$  -148.12 (s), -148.18 (s).

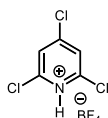

White solid (10.8 g, 80%)

**<sup>1</sup>H NMR** (500 MHz, DMSO)  $\delta$  10.99 (s, 1H), 7.86 (s, 2H).

**<sup>13</sup>C NMR** (126 MHz, DMSO)  $\delta$  150.1, 147.2, 123.8.

**<sup>19</sup>F NMR** (471 MHz, DMSO)  $\delta$  -148.09 (s), -148.15 (s).

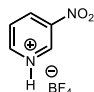

White solid (9.6 g, 91%)

**<sup>1</sup>H NMR** (500 MHz, DMSO)  $\delta$  14.10 (s, 1H), 9.39 (d,  $J$  = 2.6 Hz, 1H), 8.97 (dd,  $J$  = 4.8, 1.3 Hz, 1H), 8.63 (ddd,  $J$  = 8.4, 2.6, 1.4 Hz, 1H), 7.75 (dd,  $J$  = 8.4, 4.8 Hz, 1H).

**<sup>13</sup>C NMR** (126 MHz, DMSO)  $\delta$  154.8, 144.6, 144.4, 132.1, 124.9.

**<sup>19</sup>F NMR** (471 MHz, DMSO)  $\delta$  -148.10 (s), -148.15 (s).

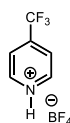

White solid (11.2 g, 95%)

**<sup>1</sup>H NMR** (500 MHz, DMSO)  $\delta$  14.78 (s, 1H), 9.01 (d,  $J$  = 6.0 Hz, 2H), 8.05 (d,  $J$  = 5.9 Hz, 2H).

**<sup>13</sup>C NMR** (126 MHz, DMSO)  $\delta$  148.8, 139.4 (q,  $J_{C-F}$  = 34.1 Hz), 122.5 (q,  $J_{C-F}$  = 273.7 Hz), 121.1 (q,  $J_{C-F}$  = 3.5 Hz).

**<sup>19</sup>F NMR** (471 MHz, DMSO)  $\delta$  -63.81 (s, 3F), -148.15 (s), -148.21 (s).

## 6. Characterization data of unreported starting materials

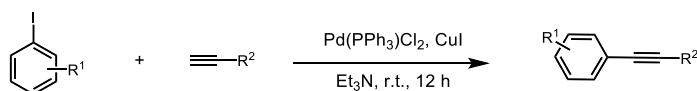

A flame-dried Schlenk-flask equipped with a magnetic stir bar was charged with bis(triphenylphosphine)palladium(II) dichloride (1.0 mol%), copper(I) iodide (3.0 mol%), and aryl iodide or aryl bromide (5.0 mmol, 1.0 equiv), sealed with a septum, and degassed by evacuation and backfilling with argon (repeated three times) before triethylamine (25 ml) was added. The corresponding terminal alkyne (5.0 mmol, 1.0 equiv) was added to the resulting suspension subsequently. The reaction mixture was then stirred at room temperature or 80 °C for 12 hours. After the reaction was complete, the reaction mixture was diluted with Et<sub>2</sub>O (30 mL) and filtered through a small pad of silica gel. The solvent was removed under reduced pressure with the aid of a rotary evaporator and the crude residue was purified by a silica gel column chromatography to give the corresponding pure alkynes.

### Methyl 3-(cyclohexylethynyl)benzoate

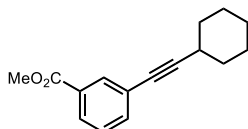

Yellow oil (1.08 g, 89% yield).

**<sup>1</sup>H NMR** (400 MHz, CDCl<sub>3</sub>) δ 8.05 (s, 1H), 7.89 (d, *J* = 7.9 Hz, 1H), 7.54 (d, *J* = 7.7 Hz, 1H), 7.32 (t, *J* = 7.8 Hz, 1H), 3.88 (s, 3H), 2.63 – 2.51 (m, 1H), 1.91 – 1.81 (m, 2H), 1.79 – 1.69 (m, 2H), 1.59 – 1.46 (m, 3H), 1.41 – 1.26 (m, 3H).

**<sup>13</sup>C NMR** (101 MHz, CDCl<sub>3</sub>) δ 166.4, 135.6, 132.6, 130.1, 128.3, 128.1, 124.5, 95.4, 79.5, 52.0, 32.5, 29.5, 25.8, 24.8.

**HRMS** (ESI) calcd for C<sub>16</sub>H<sub>19</sub>O<sub>2</sub> [M+H]<sup>+</sup>: 243.1380 Found: 243.1377.

### 2-(4-(Cyclohexylethynyl)phenyl)isoindoline-1,3-dione

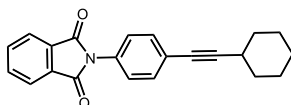

Yellow solid (1.25 g, 76% yield).

**<sup>1</sup>H NMR** (500 MHz, CDCl<sub>3</sub>) δ 7.93 (dd, *J* = 5.2, 3.0 Hz, 2H), 7.77 (dd, *J* = 5.2, 3.0 Hz, 2H), 7.51 (d, *J* = 8.3 Hz, 2H), 7.38 (d, *J* = 8.4 Hz, 2H), 2.60 (s, 1H), 1.95 – 1.82 (m, 2H), 1.81 – 1.70 (m, 2H), 1.62 – 1.47 (m, 3H), 1.42 – 1.30 (m, 3H).

**<sup>13</sup>C NMR** (126 MHz, CDCl<sub>3</sub>) δ 167.0, 134.4, 132.1, 131.6, 130.6, 126.0, 124.0, 123.7, 95.5, 79.9, 32.6, 29.6, 25.8, 24.8.

**HRMS** (ESI) calcd for C<sub>22</sub>H<sub>20</sub>NO<sub>2</sub> [M+H]<sup>+</sup>: 330.1489, Found: 330.1479.

### Methyl 3-(cyclohexylethynyl)-1-tosyl-1H-indole-6-carboxylate

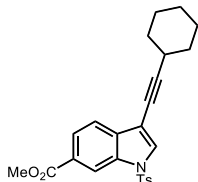

Yellow solid (1.59 g, 73% yield).

**<sup>1</sup>H NMR** (400 MHz, CDCl<sub>3</sub>) δ 8.66 (s, 1H), 7.96 (d, *J* = 8.2 Hz, 1H), 7.86 – 7.72 (m, 3H), 7.63 (d, *J* = 8.2 Hz, 1H), 7.22 (d, *J* = 8.0 Hz, 2H), 3.96 (s, 3H), 2.73 – 2.55 (m, 1H), 2.32 (s, 3H), 1.97 – 1.84 (m, 2H), 1.80 – 1.70 (m, 2H), 1.63 – 1.48 (m, 3H), 1.43 – 1.29 (m, 3H).

**<sup>13</sup>C NMR** (101 MHz, CDCl<sub>3</sub>) δ 167.0, 145.5, 134.8, 134.7, 133.6, 130.5, 130.0, 127.1, 126.9, 124.6, 120.3, 115.2, 105.9, 99.4, 70.4, 52.2, 32.6, 29.8, 25.8, 24.8, 21.5.

**HRMS** (ESI) calcd for C<sub>25</sub>H<sub>26</sub>NO<sub>4</sub>S [M+H]<sup>+</sup>: 436.1577, Found: 436.1557.

### Methyl 5-(cyclohexylethynyl)furan-2-carboxylate

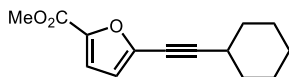

Yellow solid (916 mg, 79% yield).

**<sup>1</sup>H NMR** (400 MHz, CDCl<sub>3</sub>) δ 7.11 (d, *J* = 3.6 Hz, 1H), 6.49 (d, *J* = 3.6 Hz, 1H), 3.87 (s, 3H), 2.66 – 2.52 (m, 1H), 1.91 – 1.79 (m, 2H), 1.76 – 1.65 (m, 2H), 1.58 – 1.44 (m, 3H), 1.38 – 1.25 (m, 3H).

**<sup>13</sup>C NMR** (101 MHz, CDCl<sub>3</sub>) δ 158.4, 143.5, 141.0, 118.8, 115.1, 100.8, 70.2, 51.9, 31.9, 29.6, 25.6, 24.7.

**HRMS** (ESI) calcd for C<sub>14</sub>H<sub>17</sub>O<sub>3</sub> [M+H]<sup>+</sup>: 233.1172, Found: 233.1163.

### 1-(6-Chlorohex-1-yn-1-yl)-2-methoxy-4-nitrobenzene

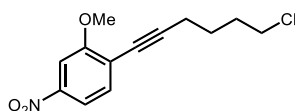

Yellow oil (1.13 g, 85% yield).

**<sup>1</sup>H NMR** (400 MHz, CDCl<sub>3</sub>) δ 7.77 (dd, *J* = 8.4, 2.1 Hz, 1H), 7.69 (d, *J* = 2.1 Hz, 1H), 7.46 (d, *J* = 8.4 Hz, 1H), 3.95 (s, 3H), 3.61 (t, *J* = 6.6 Hz, 2H), 2.55 (t, *J* = 6.9 Hz, 2H), 2.02 – 1.94 (m, 2H), 1.84 – 1.75 (m, 2H).

**<sup>13</sup>C NMR** (101 MHz, CDCl<sub>3</sub>) δ 160.1, 147.6, 133.4, 120.1, 115.6, 105.4, 99.3, 76.2, 56.3, 44.4, 31.5, 25.6, 19.2.

**HRMS** (ESI) calcd for C<sub>13</sub>H<sub>15</sub>ClNO<sub>3</sub> [M+H]<sup>+</sup>: 268.0735, Found: 268.0731.

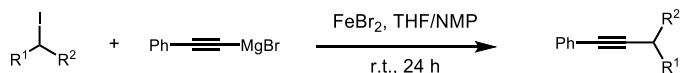

An oven-dried 250 mL flask equipped with a magnetic stir bar was charged with FeBr<sub>2</sub> (216 mg, 1.0 mmol, 0.1 equiv), secondary alkyl halide (10.0 mmol, 1.0 equiv), and NMP solvent (40 mL) under argon atmosphere. Phenylethynylmagnesium bromide solution (0.5 M in THF, 30 mL, 1.5 equiv, prepared by addition of ethylmagnesium bromide and phenylacetylene) was then added by syringe. The reaction mixture was stirred at room temperature for 16 h to form a deep brown or black solution. After the reaction was complete (24 h), the crude product was quenched with water (30 mL). The aqueous layer was further extracted with EtOAc (2 x 20 mL). The combined organic layer were concentrated in vacuo with the aid of a rotary evaporator, and the residue was purified by flash column chromatography (hexanes as an eluent) to provide the substituted alkylated alkyne product.

**(3-Methyldec-1-yn-1-yl)benzene**

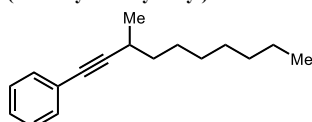

Yellow oil (1.05 g, 46% yield).

<sup>1</sup>H NMR (500 MHz, CDCl<sub>3</sub>) δ 7.43 – 7.37 (m, 2H), 7.30 – 7.23 (m, 3H), 2.71 – 2.57 (m, 1H), 1.56 – 1.43 (m, 4H), 1.34 – 1.28 (m, 8H), 1.25 (d, *J* = 6.9 Hz, 3H), 0.89 (t, *J* = 6.9 Hz, 3H).

<sup>13</sup>C NMR (126 MHz, CDCl<sub>3</sub>) δ 131.6, 128.1, 127.4, 124.1, 94.9, 80.6, 37.0, 31.9, 29.4, 29.3, 27.4, 26.5, 22.7, 21.1, 14.1.

HRMS (ASAP) calcd for C<sub>17</sub>H<sub>24</sub> [M]<sup>+</sup>: 228.1878, Found: 228.1887.

**(3*r*,5*r*,7*r*)-1-(3-Phenylprop-2-yn-1-yl)adamantane**

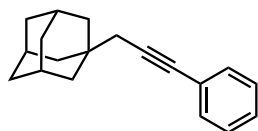

Yellow oil (950 mg, 38% yield).

<sup>1</sup>H NMR (400 MHz, CDCl<sub>3</sub>) δ 7.44 – 7.38 (m, 2H), 7.31 – 7.22 (m, 3H), 2.16 (s, 2H), 2.03 – 1.97 (m, 3H), 1.76 – 1.72 (m, 1H), 1.72 – 1.69 (m, 2H), 1.68 – 1.65 (m, 2H), 1.64 (d, *J* = 2.4 Hz, 7H).

<sup>13</sup>C NMR (101 MHz, CDCl<sub>3</sub>) δ 131.5, 128.1, 127.4, 124.2, 87.8, 82.6, 42.1, 36.9, 34.6, 33.1, 28.7.

HRMS (ASAP) calcd for C<sub>19</sub>H<sub>23</sub> [M+H]<sup>+</sup>: 251.1800, Found: 251.1811.

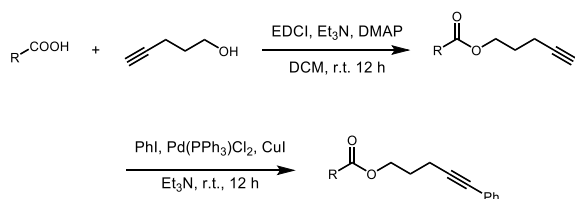

A 50-mL flask fitted with a stirring bar was charged with a solution of alcohol (5 mmol), EDCI (1.2 equiv), triethylamine (1.5 equiv), and DMAP (0.1 equiv) in dichloromethane (25 mL). The corresponding acid (1 equiv) was then added at 0 °C, and the reaction mixture was stirred overnight at room temperature. After the reaction was completed, the resulting mixture was diluted with DCM (50 mL), washed by 1 N HCl (2 x 20 mL), 1 N aqueous NaHCO<sub>3</sub> (2 x 20 mL), and brine (1 x 20 mL). The organic layer was dried (Na<sub>2</sub>SO<sub>4</sub>) and evaporated in vacuo. The resulting residue was purified by column chromatography to afford the desired ester.

A flame-dried Schlenk-flask equipped with a magnetic stir bar was charged with bis(triphenylphosphine)palladium(II) dichloride (1.0 mol%), copper(I) iodide (3.0 mol%), iodobenzene (2.0 mmol, 1.0 equiv), sealed with a septum, and degassed by alternating vacuum evacuation and argon backfilling (three times) before triethylamine (10 mL) was added. The corresponding terminal alkyne (2.0 mmol, 1.0 equiv) was added to the resulting suspension subsequently. The reaction mixture was then stirred at room temperature for 12 hours. After the reaction was completed, the reaction mixture was diluted with Et<sub>2</sub>O (20 mL) and filtrated through a small pad of silica gel. The solvent was removed under reduced pressure with the aid of a rotary evaporator and the crude residue was purified by a silica gel column chromatography to give the corresponding pure alkyne.

#### Pent-4-yn-1-yl nicotinate

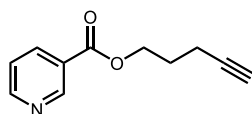

Colorless oil (737 mg, 78% yield).

<sup>1</sup>H NMR (400 MHz, CDCl<sub>3</sub>) δ 9.20 (d, *J* = 1.5 Hz, 1H), 8.75 (dd, *J* = 4.8, 1.5 Hz, 1H), 8.27 (dt, *J* = 7.9, 1.8 Hz, 1H), 7.37 (dd, *J* = 7.8, 4.9 Hz, 1H), 4.44 (t, *J* = 6.3 Hz, 2H), 2.36 (td, *J* = 7.0, 2.6 Hz, 2H), 2.04 – 1.93 (m, 3H).

<sup>13</sup>C NMR (101 MHz, CDCl<sub>3</sub>) δ 165.1, 153.4, 150.8, 136.9, 126.0, 123.2, 82.7, 69.2, 63.9, 27.4, 15.2.

HRMS (ESI) calcd for C<sub>11</sub>H<sub>12</sub>NO<sub>2</sub> [M+H]<sup>+</sup>: 190.0863, Found: 190.0858.

#### 5-Phenylpent-4-yn-1-yl nicotinate

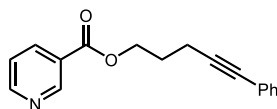

Yellow oil (445 mg, 84% yield).

<sup>1</sup>H NMR (400 MHz, CDCl<sub>3</sub>) δ 9.25 (s, 1H), 8.78 (d, *J* = 3.8 Hz, 1H), 8.31 (d, *J* = 7.9 Hz, 1H), 7.42 – 7.34 (m, 3H), 7.32 – 7.24 (m, 3H), 4.54 (t, *J* = 6.2 Hz, 2H), 2.62 (t, *J* = 6.9 Hz, 2H), 2.17 – 2.05 (m, 2H).

<sup>13</sup>C NMR (101 MHz, CDCl<sub>3</sub>) δ 165.2, 153.4, 150.9, 137.0, 131.5, 128.2, 127.7, 126.1, 123.5, 123.2, 88.3, 81.5, 64.2, 27.8, 16.3.

HRMS (ESI) calcd for C<sub>17</sub>H<sub>16</sub>NO<sub>2</sub> [M+H]<sup>+</sup>: 266.1176, Found: 266.1168.

**(Pent-4-yn-1-yloxy)carbonyl ferrocene**

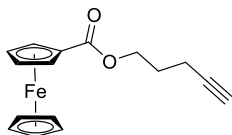

Yellow oil (1.11 g, 75% yield).

**<sup>1</sup>H NMR** (400 MHz, CDCl<sub>3</sub>) δ 4.81 (s, 2H), 4.40 (s, 2H), 4.32 (t, *J* = 6.1 Hz, 2H), 4.21 (s, 5H), 2.39 (t, *J* = 5.6 Hz, 2H), 2.04 – 1.89 (m, 3H).

**<sup>13</sup>C NMR** (101 MHz, CDCl<sub>3</sub>) δ 171.6, 83.0, 71.2, 71.0, 70.0, 69.7, 69.1, 62.5, 27.7, 15.2.

**HRMS** (APCI) calcd for C<sub>16</sub>H<sub>17</sub>FeO<sub>2</sub> [M+H]<sup>+</sup>: 297.0578, Found: 297.0590.

**(5-Phenylpent-4-yn-1-yloxy)carbonyl ferrocene**

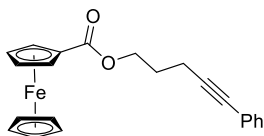

Yellow oil (662 mg, 89% yield).

**<sup>1</sup>H NMR** (400 MHz, CDCl<sub>3</sub>) δ 7.46 – 7.36 (m, 2H), 7.34 – 7.22 (m, 3H), 4.83 (s, 2H), 4.47 – 4.31 (m, 4H), 4.22 (s, 5H), 2.62 (t, *J* = 7.0 Hz, 2H), 2.13 – 1.95 (m, 2H).

**<sup>13</sup>C NMR** (101 MHz, CDCl<sub>3</sub>) δ 171.6, 131.6, 128.2, 127.7, 123.6, 88.6, 81.4, 71.2, 71.1, 70.1, 69.7, 62.8, 28.0, 16.2.

**HRMS** (APCI) calcd for C<sub>22</sub>H<sub>21</sub>FeO<sub>2</sub> [M+H]<sup>+</sup>: 373.0891, Found: 373.0909.

**Pent-4-yn-1-yl((1*S*,4*R*)-7,7-dimethyl-2-oxobicyclo[2.2.1]heptan-1-yl)methanesulfonate**

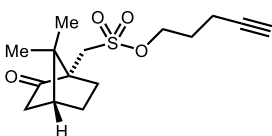

Colorless oil (1.07 g, 72% yield).

**<sup>1</sup>H NMR** (400 MHz, CDCl<sub>3</sub>) δ 4.51 – 4.29 (m, 2H), 3.59 (d, *J* = 15.1 Hz, 1H), 2.98 (d, *J* = 15.1 Hz, 1H), 2.53 – 2.27 (m, 4H), 2.20 – 1.85 (m, 6H), 1.72 – 1.59 (m, 1H), 1.49 – 1.37 (m, 1H), 1.09 (s, 3H), 0.86 (s, 3H).

**<sup>13</sup>C NMR** (101 MHz, CDCl<sub>3</sub>) δ 214.4, 82.2, 69.6, 68.7, 57.8, 47.9, 46.6, 42.6, 42.4, 27.9, 26.8, 24.8, 19.7, 19.6, 14.7.

**HRMS** (APCI) calcd for C<sub>15</sub>H<sub>23</sub>O<sub>4</sub>S [M+H]<sup>+</sup>: 299.1317, Found: 299.1330.

**5-Phenylpent-4-yn-1-yl((1*S*,4*R*)-7,7-dimethyl-2-oxobicyclo[2.2.1]heptan-1-yl)methanesulfonate**

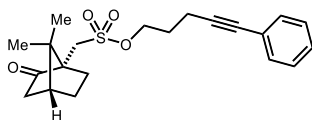

Yellow oil (682 mg, 91% yield).

**<sup>1</sup>H NMR** (400 MHz, CDCl<sub>3</sub>) δ 7.43 – 7.35 (m, 2H), 7.30 – 7.24 (m, 3H), 4.52 – 4.41 (m, 2H), 3.63 (d, *J* = 15.1 Hz, 1H), 3.01 (d, *J* = 15.1 Hz, 1H), 2.57 (t, *J* = 6.9 Hz, 2H), 2.53 – 2.43 (m, 1H), 2.42 – 2.32 (m, 1H), 2.13 – 1.89 (m, 5H), 1.67 (ddd, *J* = 14.0, 9.4, 4.7 Hz, 1H), 1.42 (ddd, *J* = 13.0, 9.4, 3.9 Hz, 1H), 1.10 (s, 3H), 0.84 (s, 3H).

**<sup>13</sup>C NMR** (101 MHz, CDCl<sub>3</sub>) δ 214.2, 131.4, 128.0, 127.6, 123.3, 87.6, 81.6, 68.8, 57.7, 47.8, 46.4, 42.5, 42.3, 28.1, 26.7, 24.7, 19.53, 19.42, 15.6.

**HRMS** (APCI) calcd for C<sub>21</sub>H<sub>27</sub>O<sub>4</sub>S [M+H]<sup>+</sup>: 375.1630, Found: 375.1647.

#### Pent-4-yn-1-yl 4-(*N,N*-dipropylsulfamoyl)benzoate

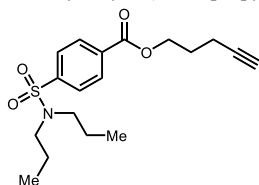

Colorless oil (1.39 g, 79% yield).

**<sup>1</sup>H NMR** (400 MHz, CDCl<sub>3</sub>) δ 8.15 (d, *J* = 8.6 Hz, 2H), 7.87 (d, *J* = 8.6 Hz, 2H), 4.46 (t, *J* = 6.3 Hz, 2H), 3.16 – 3.02 (m, 4H), 2.39 (td, *J* = 7.0, 2.6 Hz, 2H), 2.07 – 1.93 (m, 3H), 1.61 – 1.47 (m, 4H), 0.86 (t, *J* = 7.4 Hz, 6H).

**<sup>13</sup>C NMR** (101 MHz, CDCl<sub>3</sub>) δ 165.1, 144.3, 133.4, 130.2, 127.0, 82.8, 69.2, 64.1, 49.9, 27.5, 21.9, 15.3, 11.1.

**HRMS** (APCI) calcd for C<sub>18</sub>H<sub>26</sub>NO<sub>4</sub>S [M+H]<sup>+</sup>: 352.1583, Found: 352.1598.

#### 5-Phenylpent-4-yn-1-yl 4-(*N,N*-dipropylsulfamoyl)benzoate

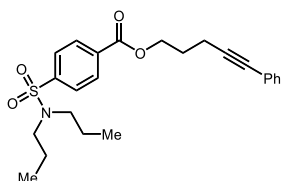

Yellow oil (769 mg, 90% yield).

**<sup>1</sup>H NMR** (400 MHz, CDCl<sub>3</sub>) δ 8.17 (d, *J* = 8.5 Hz, 2H), 7.84 (d, *J* = 8.5 Hz, 2H), 7.42 – 7.34 (m, 2H), 7.31 – 7.23 (m, 3H), 4.52 (t, *J* = 6.2 Hz, 2H), 3.14 – 3.02 (m, 4H), 2.62 (t, *J* = 6.9 Hz, 2H), 2.15 – 2.04 (m, 2H), 1.60 – 1.48 (m, 4H), 0.87 (t, *J* = 7.4 Hz, 6H).

**<sup>13</sup>C NMR** (101 MHz, CDCl<sub>3</sub>) δ 165.0, 144.1, 133.4, 131.4, 130.1, 128.1, 127.6, 126.8, 123.4, 88.3, 81.3, 64.3, 49.8, 27.7, 21.8, 16.3, 11.0.

**HRMS** (APCI) calcd for C<sub>24</sub>H<sub>30</sub>NO<sub>4</sub>S [M+H]<sup>+</sup>: 428.1896, Found: 428.1914.

#### Pent-4-yn-1-yl 2-(3-cyano-4-isobutoxyphenyl)-4-methylthiazole-5-carboxylate

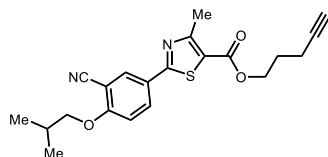

White solid (1.39 g, 73% yield).

**<sup>1</sup>H NMR** (400 MHz, CDCl<sub>3</sub>) δ 8.18 (d, *J* = 2.2 Hz, 1H), 8.09 (dd, *J* = 8.8, 2.2 Hz, 1H), 7.01 (d, *J* = 8.9 Hz, 1H), 4.41 (t, *J* = 6.2 Hz, 2H), 3.90 (d, *J* = 6.5 Hz, 2H), 2.76 (s, 3H), 2.38 (td, *J* = 7.0, 2.6 Hz, 2H), 2.27 – 2.14 (m, 1H), 2.04 – 1.92 (m, 3H), 1.09 (d, *J* = 6.7 Hz, 6H).

**<sup>13</sup>C NMR** (101 MHz, CDCl<sub>3</sub>) δ 167.3, 162.5, 161.9, 161.3, 132.5, 132.1, 126.0, 121.6, 115.4, 112.6, 103.0, 82.7, 75.7, 69.3, 63.8, 28.1, 27.5, 19.0, 17.5, 15.3.

**HRMS** (APCI) calcd for C<sub>21</sub>H<sub>23</sub>N<sub>2</sub>O<sub>3</sub>S [M+H]<sup>+</sup>: 383.1429, Found: 383.1447.

#### 5-Phenylpent-4-yn-1-yl 2-(3-cyano-4-isobutoxyphenyl)-4-methylthiazole-5-carboxylate

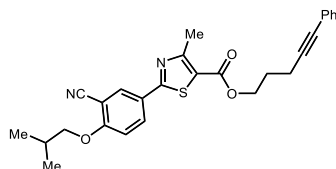

White solid (687 mg, 75% yield).

**<sup>1</sup>H NMR** (400 MHz, CDCl<sub>3</sub>) δ 8.11 (d, *J* = 1.5 Hz, 1H), 8.02 (dd, *J* = 8.7, 1.6 Hz, 1H), 7.49 – 7.32 (m, 2H), 7.31 – 7.12 (m, 3H), 6.97 (d, *J* = 8.9 Hz, 1H), 4.45 (t, *J* = 6.0 Hz, 2H), 3.87 (d, *J* = 6.4 Hz, 2H), 2.75 (s, 3H), 2.59 (t, *J* = 6.8 Hz, 2H), 2.28 – 2.12 (m, 1H), 2.12 – 1.94 (m, 2H), 1.08 (d, *J* = 6.6 Hz, 6H).

**<sup>13</sup>C NMR** (101 MHz, CDCl<sub>3</sub>) δ 167.1, 162.4, 161.8, 161.1, 132.4, 131.9, 131.4, 128.1, 127.6, 125.8, 123.5, 121.5, 115.3, 112.5, 102.8, 88.3, 81.4, 75.6, 64.0, 28.0, 27.7, 18.9, 17.4, 16.3.

**HRMS** (APCI) calcd for C<sub>27</sub>H<sub>27</sub>N<sub>2</sub>O<sub>3</sub>S [M+H]<sup>+</sup>: 459.1742, Found: 459.1764.

#### Pent-4-yn-1-yl

#### 4'-((1,7'-dimethyl-2'-propyl-1H,3'H-[2,5'-bibenzo[d]imidazol]-3'-yl)methyl)-[1,1'-biphenyl]-2-carboxylate

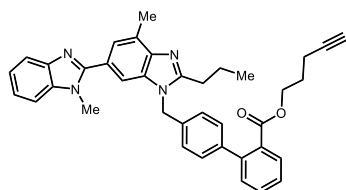

White solid (1.86 g, 64% yield).

**<sup>1</sup>H NMR** (400 MHz, CDCl<sub>3</sub>) δ 7.76 (d, *J* = 7.8 Hz, 2H), 7.45 – 7.36 (m, 3H), 7.32 (t, *J* = 7.5 Hz, 1H), 7.25 – 7.15 (m, 6H), 7.04 (d, *J* = 7.8 Hz, 2H), 5.38 (s, 2H), 4.04 (t, *J* = 5.7 Hz, 2H), 3.67 (s, 3H), 2.95 – 2.81 (m, 2H), 2.73 (s, 3H), 1.89 (t, *J* = 2.4 Hz, 1H), 1.87 – 1.73 (m, 4H), 1.55 – 1.43 (m, 2H), 1.01 (t, *J* = 7.2 Hz, 3H).





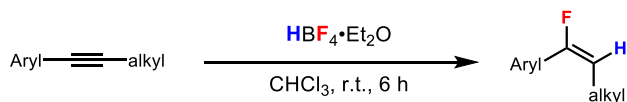

**Condition B:** A reaction tube (13 mm × 100 mm, Fisherbrand, part # 14-959-35C) equipped with a magnetic stir bar was flame dried under vacuum. The reaction tube was cooled under argon and transferred into an argon-filled glovebox. In the glovebox, dry  $\text{CHCl}_3$  (1.0 mL), alkyne (0.2 mmol, 1.0 equiv) and  $\text{HBF}_4 \cdot \text{Et}_2\text{O}$  (27  $\mu\text{L}$ , 0.2 mmol, 1.0 equiv) were added in succession. The reaction tube was sealed and removed from the glovebox and stirred at room temperature for 6 hours. The resulting mixture was passed through a pad of silica gel and eluted with  $\text{CH}_2\text{Cl}_2$ . The filtrate was concentrated *in vacuo* and purified by flash column chromatography to provide the desired product.

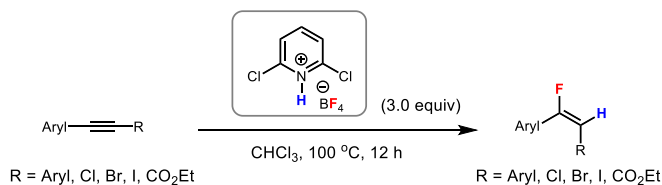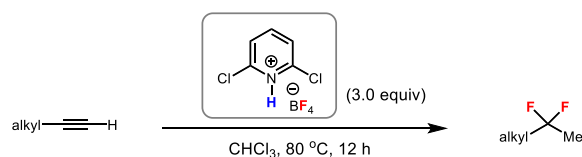

**Condition C:** A reaction tube (13 mm × 100 mm, Fisherbrand, part # 14-959-35C) equipped with a magnetic stir bar was flame dried under vacuum. The reaction tube was cooled under argon and transferred into an argon-filled glovebox. In the glovebox, 2,6-dichloropyridinium tetrafluoroborate (0.6 mmol, 141 mg, 3.0 equiv), dry  $\text{CHCl}_3$  (3.0 mL) and alkyne (0.2 mmol, 1.0 equiv) were added in succession. The reaction tube was sealed and removed from the glovebox. After stirred at 80 or 100 °C for 12 hours, the reaction mixture was cooled to room temperature. The resulting mixture was passed through a pad of silica gel and eluted with  $\text{CH}_2\text{Cl}_2$ . The filtrate was concentrated *in vacuo* and purified by flash column chromatography to provide the desired product.

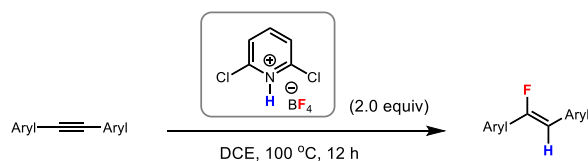

**Condition D:** A reaction tube (13 mm × 100 mm, Fisherbrand, part # 14-959-35C) equipped with a magnetic stir bar was flame dried under vacuum. The reaction tube was cooled under argon and transferred into an argon-filled glovebox. In the glovebox, 2,6-dichloropyridinium tetrafluoroborate (0.4 mmol, 97 mg, 2.0 equiv), dry DCE (2.0 mL) and alkyne (0.2 mmol, 1.0 equiv) were added in succession. The reaction tube was sealed and removed from the glovebox. After stirred at 100 °C for 12 hours, the reaction mixture was cooled to room temperature. The resulting mixture was passed through

a pad of silica gel and eluted with CH<sub>2</sub>Cl<sub>2</sub>. The filtrate was concentrated *in vacuo* and purified by flash column chromatography to provide the desired product.

**Condition A (reaction under air):** A sample (~1 g) of 2,6-dichloropyridinium tetrafluoroborate was removed from the glovebox and condition **A** was repeated outside of the glovebox for (cyclohexylethynyl)benzene (0.2 mmol) by charging an oven-dried reaction tube with fluorinating reagent, dried solvent, and substrate sequentially. The reaction tube was sealed under air and placed in an oil bath at 70 °C. After a reaction time of 6 h, the NMR yield of the desired product (**1**) was determined to be 78% using trifluorotoluene as the internal standard

## 8. Characterization data of products

### (*Z*)-(2-Cyclohexyl-1-fluorovinyl)benzene (**1**)

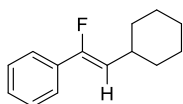

Prepared following the general procedure (**condition A**): 2,6-dichloropyridinium tetrafluoroborate (0.2 mmol, 47 mg, 1.0 equiv), LiBF<sub>4</sub> (0.25 mmol, 4.7 mg, 0.25 equiv), dry CHCl<sub>3</sub> (1.0 mL), (cyclohexylethynyl)benzene (0.2 mmol, 37 mg, 1.0 equiv) at 70 °C. The reaction mixture was quenched after 6 h, and the crude residue was purified by flash column chromatography (hexanes) to provide the title compound **1** with spectral properties identical to the reported in the literature<sup>[1]</sup>. Pale yellow oil (31 mg, 76% yield, *Z/E* > 50 : 1).

**<sup>1</sup>H NMR** (500 MHz, CDCl<sub>3</sub>) δ 7.51 (d, *J* = 7.4 Hz, 2H), 7.35 (t, *J* = 7.7 Hz, 2H), 7.32 – 7.27 (m, 1H), 5.29 (dd, *J* = 38.2, 9.2 Hz, 1H), 2.73 – 2.59 (m, 1H), 1.84 – 1.73 (m, 4H), 1.72 – 1.65 (m, 1H), 1.42 – 1.32 (m, 2H), 1.28 – 1.14 (m, 3H).

**<sup>13</sup>C NMR** (126 MHz, CDCl<sub>3</sub>) δ 155.4 (d, *J*<sub>C-F</sub> = 245.3 Hz), 132.9 (d, *J*<sub>C-F</sub> = 29.4 Hz), 128.3 (d, *J*<sub>C-F</sub> = 1.9 Hz), 128.2, 123.8 (d, *J*<sub>C-F</sub> = 7.0 Hz), 112.0 (d, *J*<sub>C-F</sub> = 17.1 Hz), 33.8 (d, *J*<sub>C-F</sub> = 3.6 Hz), 33.2 (d, *J*<sub>C-F</sub> = 1.2 Hz), 26.0, 25.8.

**<sup>19</sup>F NMR** (471 MHz, CDCl<sub>3</sub>) δ -121.8 (d, *J* = 38.2 Hz).

### (*E*)-(2-Cyclohexyl-1-fluorovinyl)benzene (**2**)

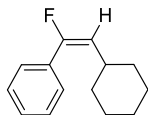

Prepared following the general procedure (**condition B**): (cyclohexylethynyl)benzene (0.2 mmol, 37 mg, 1.0 equiv), dry CHCl<sub>3</sub> (1.0 mL), HBF<sub>4</sub>·Et<sub>2</sub>O (27 μL, 0.2 mmol, 1.0 equiv) at room temperature. The reaction mixture was quenched after 6 h, and the crude residue was purified by flash column chromatography (hexanes) to provide the title compound **2**. Pale yellow oil (17 mg, 42% yield, *E/Z* = 11 : 1).

**<sup>1</sup>H NMR** (500 MHz, CDCl<sub>3</sub>) δ 7.51 – 7.43 (m, 2H), 7.43 – 7.32 (m, 3H), 5.26 (dd, *J* = 23.1, 10.8 Hz, 1H), 2.37 – 2.18 (m, 1H), 1.83 – 1.69 (m, 4H), 1.69 – 1.60 (m, 1H), 1.32 – 1.14 (m, 5H).

**<sup>13</sup>C NMR** (126 MHz, CDCl<sub>3</sub>) δ 155.7 (d, *J*<sub>C-F</sub> = 240.1 Hz), 132.4 (d, *J*<sub>C-F</sub> = 30.2 Hz), 128.8 (d, *J*<sub>C-F</sub> = 1.1 Hz), 128.2, 127.5 (d, *J*<sub>C-F</sub> = 5.0 Hz), 114.5 (d, *J*<sub>C-F</sub> = 21.9 Hz), 35.2 (d, *J*<sub>C-F</sub> = 7.6 Hz), 33.8 (d, *J*<sub>C-F</sub> = 2.3 Hz), 25.9, 25.6.

**<sup>19</sup>F NMR** (471 MHz, CDCl<sub>3</sub>) δ -103.5 (d, *J* = 23.1 Hz).

**HRMS** (APCI) calcd for C<sub>14</sub>H<sub>18</sub>F [M+H]<sup>+</sup>: 205.1387, Found: 205.1377.

**(Z)-1-(2-Cyclohexyl-1-fluorovinyl)-4-fluorobenzene (3)**

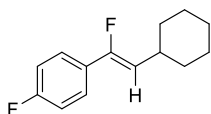

Prepared following the general procedure (**condition A**): 2,6-dichloropyridinium tetrafluoroborate (0.2 mmol, 47 mg, 1.0 equiv), LiBF<sub>4</sub> (0.25 mmol, 4.7 mg, 0.25 equiv), dry CHCl<sub>3</sub> (1.0 mL), 1-(cyclohexylethynyl)-4-fluorobenzene (0.2 mmol, 41 mg, 1.0 equiv) at 70 °C. The reaction mixture was quenched after 6 h, and the crude residue was purified by flash column chromatography (hexanes) to provide the title compound **3**. Pale yellow oil (33 mg, 74% yield, *Z/E* > 50 : 1).

**<sup>1</sup>H NMR** (500 MHz, CDCl<sub>3</sub>) δ 7.50 – 7.43 (m, 2H), 7.03 (t, *J* = 8.7 Hz, 2H), 5.19 (dd, *J* = 38.1, 9.2 Hz, 1H), 2.68 – 2.56 (m, 1H), 1.81 – 1.71 (m, 4H), 1.71 – 1.64 (m, 1H), 1.41 – 1.30 (m, 2H), 1.28 – 1.11 (m, 3H).

**<sup>13</sup>C NMR** (126 MHz, CDCl<sub>3</sub>) δ 162.7 (d, *J*<sub>C-F</sub> = 247.9 Hz), 154.7 (d, *J*<sub>C-F</sub> = 245.1 Hz), 129.2 (dd, *J*<sub>C-F</sub> = 30.2, 3.3 Hz), 125.8 (dd, *J*<sub>C-F</sub> = 7.9, 7.2 Hz), 115.3 (dd, *J*<sub>C-F</sub> = 21.8, 1.8 Hz), 111.8 (dd, *J*<sub>C-F</sub> = 17.1, 1.7 Hz), 33.8 (d, *J*<sub>C-F</sub> = 3.6 Hz), 33.2 (d, *J*<sub>C-F</sub> = 1.0 Hz), 26.0, 25.8.

**<sup>19</sup>F NMR** (471 MHz, CDCl<sub>3</sub>) δ -113.2 – -113.4 (m, 1F), -120.7 (d, *J* = 38.1 Hz, 1F).

**HRMS** (ASAP) calcd for C<sub>14</sub>H<sub>16</sub>F<sub>2</sub> [M]<sup>+</sup>: 222.1220, Found: 222.1227.

**(E)-1-(2-Cyclohexyl-1-fluorovinyl)-4-fluorobenzene (4)**

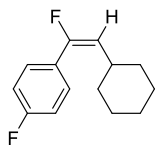

Prepared following the general procedure (**condition B**): 1-(cyclohexylethynyl)-4-fluorobenzene (0.2 mmol, 41 mg, 1.0 equiv), dry CHCl<sub>3</sub> (1.0 mL), HBF<sub>4</sub>·Et<sub>2</sub>O (27 μL, 0.2 mmol, 1.0 equiv) at room temperature. The reaction mixture was quenched after 6 h, and the crude residue was purified by flash column chromatography (hexanes) to provide the title compound **4**. Pale yellow oil (20 mg, 45% yield, *E/Z* = 11 : 1).

**<sup>1</sup>H NMR** (500 MHz, CDCl<sub>3</sub>) δ 7.42 (dd, *J* = 8.6, 5.6 Hz, 2H), 7.09 (t, *J* = 8.7 Hz, 2H), 5.24 (dd, *J* = 22.8, 10.8 Hz, 1H), 2.28 – 2.12 (m, 1H), 1.78 – 1.69 (m, 4H), 1.68 – 1.61 (m, 1H), 1.29 – 1.15 (m, 5H).

**<sup>13</sup>C NMR** (126 MHz, CDCl<sub>3</sub>) δ 162.8 (d, *J*<sub>C-F</sub> = 248.9 Hz), 154.9 (d, *J*<sub>C-F</sub> = 240.2 Hz), 129.4 (dd, *J*<sub>C-F</sub> = 8.3, 4.8 Hz), 128.6 (dd, *J*<sub>C-F</sub> = 31.0, 3.4 Hz), 115.3 (d, *J*<sub>C-F</sub> = 21.7 Hz), 114.4 (d, *J*<sub>C-F</sub> = 21.8 Hz), 35.3 (d, *J*<sub>C-F</sub> = 7.4 Hz), 33.7 (d, *J*<sub>C-F</sub> = 2.2 Hz), 25.8, 25.6.

<sup>19</sup>F NMR (471 MHz, CDCl<sub>3</sub>) δ (*E*): -102.5 (d, *J* = 22.8 Hz), -111.6 – -111.9 (m), (*Z*): -113.3 – -113.4 (m), -120.8 (d, *J* = 38.0 Hz).

HRMS (APCI) calcd for C<sub>14</sub>H<sub>16</sub>F<sub>2</sub> [M]<sup>+</sup>: 222.1215, Found: 222.1205.

**(*Z*)-1-Chloro-4-(2-cyclohexyl-1-fluorovinyl)benzene (5)**

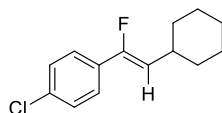

Prepared following the general procedure (**condition A**): 2,6-dichloropyridinium tetrafluoroborate (0.2 mmol, 47 mg, 1.0 equiv), LiBF<sub>4</sub> (0.25 mmol, 4.7 mg, 0.25 equiv), dry CHCl<sub>3</sub> (1.0 mL), 1-chloro-4-(cyclohexylethynyl)benzene (0.2 mmol, 44 mg, 1.0 equiv) at 70 °C. The reaction mixture was quenched after 6 h, and the crude residue was purified by flash column chromatography (hexanes) to provide the title compound **5**. Pale yellow oil (36 mg, 76% yield, *Z/E* > 50 : 1).

<sup>1</sup>H NMR (500 MHz, CDCl<sub>3</sub>) δ 7.44 – 7.38 (m, 2H), 7.31 (d, *J* = 8.3 Hz, 2H), 5.26 (dd, *J* = 38.0, 9.2 Hz, 1H), 2.68 – 2.56 (m, 1H), 1.82 – 1.71 (m, 4H), 1.71 – 1.64 (m, 1H), 1.41 – 1.30 (m, 2H), 1.27 – 1.11 (m, 3H).

<sup>13</sup>C NMR (126 MHz, CDCl<sub>3</sub>) δ 154.5 (d, *J*<sub>C-F</sub> = 245.1 Hz), 134.0, 131.4 (d, *J*<sub>C-F</sub> = 30.1 Hz), 128.6 (d, *J*<sub>C-F</sub> = 1.9 Hz), 125.2 (d, *J*<sub>C-F</sub> = 7.0 Hz), 112.6 (d, *J*<sub>C-F</sub> = 17.0 Hz), 33.8 (d, *J*<sub>C-F</sub> = 3.4 Hz), 33.1 (d, *J*<sub>C-F</sub> = 1.1 Hz), 26.0, 25.8.

<sup>19</sup>F NMR (471 MHz, CDCl<sub>3</sub>) δ -121.7 (d, *J* = 38.0 Hz).

HRMS (ASAP) calcd for C<sub>14</sub>H<sub>16</sub>ClF [M]<sup>+</sup>: 238.0925, Found: 238.0936.

**(*E*)-1-Chloro-4-(2-cyclohexyl-1-fluorovinyl)benzene (6)**

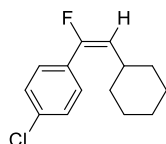

Prepared following the general procedure (**condition B**): 1-chloro-4-(cyclohexylethynyl)benzene (0.2 mmol, 44 mg, 1.0 equiv), dry CHCl<sub>3</sub> (1.0 mL), HBF<sub>4</sub>·Et<sub>2</sub>O (27 μL, 0.2 mmol, 1.0 equiv) at room temperature. The reaction mixture was quenched after 6 h, and the crude residue was purified by flash column chromatography (hexanes) to provide the title compound **6**. Pale yellow oil (19 mg, 41% yield, *E/Z* = 11 : 1).

<sup>1</sup>H NMR (500 MHz, CDCl<sub>3</sub>) δ 7.44 – 7.27 (m, 4H), 5.27 (dd, *J* = 22.9, 10.8 Hz, 1H), 2.31 – 2.13 (m, 1H), 1.79 – 1.69 (m, 4H), 1.68 – 1.61 (m, 1H), 1.29 – 1.13 (m, 5H).

<sup>13</sup>C NMR (126 MHz, CDCl<sub>3</sub>) δ 154.7 (d, *J*<sub>C-F</sub> = 240.1 Hz), 134.7, 130.8 (d, *J*<sub>C-F</sub> = 30.9 Hz), 128.8 (d, *J*<sub>C-F</sub> = 4.9 Hz), 128.5, 115.1 (d, *J*<sub>C-F</sub> = 21.7 Hz), 35.3 (d, *J*<sub>C-F</sub> = 7.3 Hz), 33.7 (d, *J*<sub>C-F</sub> = 2.1 Hz), 25.8, 25.6.

<sup>19</sup>F NMR (471 MHz, CDCl<sub>3</sub>) δ (*E*): -103.9 (d, *J* = 22.8 Hz), (*Z*): -121.7 (d, *J* = 38.1 Hz).

HRMS (APCI) calcd for C<sub>14</sub>H<sub>16</sub>ClF [M]<sup>+</sup>: 238.0919, Found: 238.0909.

**(*Z*)-1-Bromo-4-(2-cyclohexyl-1-fluorovinyl)benzene (7)**

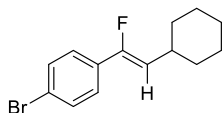

Prepared following the general procedure (**condition A**): 2,6-dichloropyridinium tetrafluoroborate (0.2 mmol, 47 mg, 1.0 equiv),  $\text{LiBF}_4$  (0.25 mmol, 4.7 mg, 0.25 equiv), dry  $\text{CHCl}_3$  (1.0 mL), 1-bromo-4-(cyclohexylethynyl)benzene (0.2 mmol, 53 mg, 1.0 equiv) at 70 °C. The reaction mixture was quenched after 6 h, and the crude residue was purified by flash column chromatography (hexanes) to provide the title compound **7**. Pale yellow oil (39 mg, 70% yield,  $Z/E > 50 : 1$ ).

$^1\text{H NMR}$  (500 MHz,  $\text{CDCl}_3$ )  $\delta$  7.46 (d,  $J = 8.4$  Hz, 2H), 7.37 – 7.32 (m, 2H), 5.27 (dd,  $J = 38.0, 9.3$  Hz, 1H), 2.68 – 2.56 (m, 1H), 1.81 – 1.71 (m, 4H), 1.71 – 1.63 (m, 1H), 1.41 – 1.30 (m, 2H), 1.27 – 1.11 (m, 3H).

$^{13}\text{C NMR}$  (126 MHz,  $\text{CDCl}_3$ )  $\delta$  154.6 (d,  $J_{\text{C-F}} = 245.1$  Hz), 131.9 (d,  $J_{\text{C-F}} = 30.0$  Hz), 131.5 (d,  $J_{\text{C-F}} = 1.9$  Hz), 125.4 (d,  $J_{\text{C-F}} = 6.9$  Hz), 122.2, 112.7 (d,  $J_{\text{C-F}} = 17.0$  Hz), 33.8 (d,  $J_{\text{C-F}} = 3.5$  Hz), 33.0 (d,  $J_{\text{C-F}} = 1.2$  Hz), 26.0, 25.8.

$^{19}\text{F NMR}$  (471 MHz,  $\text{CDCl}_3$ )  $\delta$  -121.8 (d,  $J = 38.0$  Hz).

**HRMS** (ASAP) calcd for  $\text{C}_{14}\text{H}_{16}\text{BrF}$   $[\text{M}]^+$ : 282.0419, Found: 282.0432.

**(E)-1-Bromo-4-(2-cyclohexyl-1-fluorovinyl)benzene (8)**

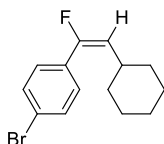

Prepared following the general procedure (**condition B**): 1-bromo-4-(cyclohexylethynyl)benzene (0.2 mmol, 53 mg, 1.0 equiv), dry  $\text{CHCl}_3$  (1.0 mL),  $\text{HBF}_4 \cdot \text{Et}_2\text{O}$  (27  $\mu\text{L}$ , 0.2 mmol, 1.0 equiv) at room temperature. The reaction mixture was quenched after 6 h, and the crude residue was purified by flash column chromatography (hexanes) to provide the title compound **8**. Pale yellow oil (27 mg, 48% yield,  $E/Z > 20 : 1$ ).

$^1\text{H NMR}$  (500 MHz,  $\text{CDCl}_3$ )  $\delta$  7.53 (d,  $J = 8.3$  Hz, 2H), 7.31 (d,  $J = 8.4$  Hz, 2H), 5.28 (dd,  $J = 22.9, 10.8$  Hz, 1H), 2.33 – 2.12 (m, 1H), 1.80 – 1.69 (m, 4H), 1.69 – 1.61 (m, 1H), 1.29 – 1.14 (m, 5H).

$^{13}\text{C NMR}$  (126 MHz,  $\text{CDCl}_3$ )  $\delta$  154.7 (d,  $J_{\text{C-F}} = 240.1$  Hz), 131.5, 131.3 (d,  $J_{\text{C-F}} = 30.9$  Hz), 129.0 (d,  $J_{\text{C-F}} = 4.9$  Hz), 123.0 (d,  $J_{\text{C-F}} = 1.5$  Hz), 115.2 (d,  $J_{\text{C-F}} = 21.6$  Hz), 35.3 (d,  $J_{\text{C-F}} = 7.4$  Hz), 33.6 (d,  $J_{\text{C-F}} = 2.2$  Hz), 25.8, 25.6.

$^{19}\text{F NMR}$  (471 MHz,  $\text{CDCl}_3$ )  $\delta$  (E): -104.2 (d,  $J = 22.9$  Hz), (Z): -121.9 (d,  $J = 37.9$  Hz).

**HRMS** (APCI) calcd for  $\text{C}_{14}\text{H}_{16}\text{BrF}$   $[\text{M}]^+$ : 282.0414, Found: 282.0403.

**(Z)-1-(2-Cyclohexyl-1-fluorovinyl)-4-(trifluoromethyl)benzene (9)**

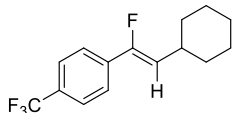

Prepared following general **condition D**: 2,6-dichloropyridinium tetrafluoroborate (0.4 mmol, 94 mg, 2.0 equiv), dry DCE (2.0 mL), 1-(cyclohexylethynyl)-4-(trifluoromethyl)benzene (0.2 mmol, 50 mg,

1.0 equiv) at 90 °C. The reaction mixture was quenched after 12 h, and the crude residue was purified by flash column chromatography (hexanes) to provide the title compound **9**. Pale yellow oil (39 mg, 72% yield, *Z/E* > 50 : 1).

**<sup>1</sup>H NMR** (500 MHz, CDCl<sub>3</sub>) δ 7.59 (s, 4H), 5.40 (dd, *J* = 37.7, 9.3 Hz, 1H), 2.65 (dt, *J* = 20.8, 7.3 Hz, 1H), 1.82 – 1.72 (m, 4H), 1.71 – 1.65 (m, 1H), 1.42 – 1.30 (m, 2H), 1.28 – 1.14 (m, 3H).

**<sup>13</sup>C NMR** (126 MHz, CDCl<sub>3</sub>) δ 154.2 (d, *J*<sub>C-F</sub> = 245.4 Hz), 136.3 (d, *J*<sub>C-F</sub> = 29.7 Hz), 130.1 (q, *J*<sub>C-F</sub> = 32.5 Hz), 125.47 – 125.27 (m), 124.02 (d, *J*<sub>C-F</sub> = 7.0 Hz), 124.01 (q, *J*<sub>C-F</sub> = 273.4 Hz), 114.5 (d, *J*<sub>C-F</sub> = 16.8 Hz), 33.9 (d, *J*<sub>C-F</sub> = 3.4 Hz), 33.0 (d, *J*<sub>C-F</sub> = 1.1 Hz), 25.9, 25.8.

**<sup>19</sup>F NMR** (471 MHz, CDCl<sub>3</sub>) δ -62.7 (s, 3F), -122.2 (d, *J* = 37.7 Hz, 1F).

**HRMS** (ASAP) calcd for C<sub>15</sub>H<sub>16</sub>F<sub>4</sub> [M]<sup>+</sup>: 272.1188, Found: 272.1198.

#### (*Z*)-4-(2-Cyclohexyl-1-fluorovinyl)-1,1'-biphenyl (**10**)

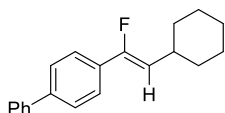

Prepared following the general procedure (**condition A**): 2,6-dichloropyridinium tetrafluoroborate (0.2 mmol, 47 mg, 1.0 equiv), LiBF<sub>4</sub> (0.25 mmol, 4.7 mg, 0.25 equiv), dry CHCl<sub>3</sub> (1.0 mL), 4-(cyclohexylethynyl)-1,1'-biphenyl (0.2 mmol, 52 mg, 1.0 equiv) at 70 °C. The reaction mixture was quenched after 6 h, and the crude residue was purified by flash column chromatography (hexanes) to provide the title compound **10**. Pale yellow oil (39 mg, 70% yield, *Z/E* > 50 : 1).

**<sup>1</sup>H NMR** (500 MHz, CDCl<sub>3</sub>) δ 7.65 – 7.52 (m, 6H), 7.45 (m, 2H), 7.36 (m, 1H), 5.32 (dd, *J* = 38.2, 9.2 Hz, 1H), 2.74 – 2.59 (m, 1H), 1.85 – 1.72 (m, 4H), 1.72 – 1.63 (m, 1H), 1.43 – 1.32 (m, 2H), 1.29 – 1.13 (m, 3H).

**<sup>13</sup>C NMR** (126 MHz, CDCl<sub>3</sub>) δ 155.2 (d, *J*<sub>C-F</sub> = 245.0 Hz), 141.0, 140.5, 131.9 (d, *J*<sub>C-F</sub> = 29.7 Hz), 128.8, 127.5, 127.04 (d, *J*<sub>C-F</sub> = 1.9 Hz), 126.97, 124.3 (d, *J*<sub>C-F</sub> = 6.9 Hz), 112.2 (d, *J*<sub>C-F</sub> = 17.2 Hz), 33.9 (d, *J*<sub>C-F</sub> = 3.6 Hz), 33.2, 26.0, 25.9.

**<sup>19</sup>F NMR** (471 MHz, CDCl<sub>3</sub>) δ -121.8 (d, *J* = 38.2 Hz).

**HRMS** (ASAP) calcd for C<sub>20</sub>H<sub>22</sub>F [M+H]<sup>+</sup>: 281.1706, Found: 281.1695.

#### (*E*)-4-(2-Cyclohexyl-1-fluorovinyl)-1,1'-biphenyl (**11**)

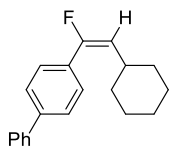

Prepared following the general procedure (**condition B**): 4-(cyclohexylethynyl)-1,1'-biphenyl (0.2 mmol, 52 mg, 1.0 equiv), dry CHCl<sub>3</sub> (1.0 mL), HBF<sub>4</sub>·Et<sub>2</sub>O (27 μL, 0.2 mmol, 1.0 equiv) at room temperature. The reaction mixture was quenched after 6 h, and the crude residue was purified by flash column chromatography (hexanes) to provide the title compound **11**. Pale yellow oil (18 mg, 32% yield, *E/Z* > 20 : 1).

**<sup>1</sup>H NMR** (500 MHz, CDCl<sub>3</sub>) δ 7.63 (t, *J* = 7.5 Hz, 4H), 7.53 (d, *J* = 8.2 Hz, 2H), 7.46 (t, *J* = 7.6 Hz, 2H), 7.38 (t, *J* = 7.4 Hz, 1H), 5.29 (dd, *J* = 23.1, 10.8 Hz, 1H), 2.44 – 2.24 (m, 1H), 1.86 – 1.70 (m, 4H), 1.70 – 1.63 (m, 1H), 1.34 – 1.17 (m, 5H).

<sup>13</sup>C NMR (126 MHz, CDCl<sub>3</sub>) δ 155.5 (d, *J*<sub>C-F</sub> = 239.7 Hz), 141.6, 140.4, 131.3 (d, *J*<sub>C-F</sub> = 30.4 Hz), 128.8, 127.8 (d, *J*<sub>C-F</sub> = 5.1 Hz), 127.6, 127.1, 126.9, 114.7 (d, *J*<sub>C-F</sub> = 22.1 Hz), 35.3 (d, *J*<sub>C-F</sub> = 7.6 Hz), 33.8 (d, *J*<sub>C-F</sub> = 2.1 Hz), 25.9, 25.7.

<sup>19</sup>F NMR (471 MHz, CDCl<sub>3</sub>) δ -104.1 (d, *J* = 23.0 Hz).

HRMS (APCI) calcd for C<sub>20</sub>H<sub>21</sub>F [M]<sup>+</sup>: 280.1622, Found: 280.1610.

**(Z)-1-(2-Cyclohexyl-1-fluorovinyl)-4-methylbenzene (12)**

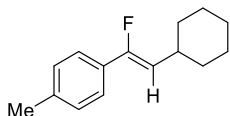

Prepared following the general procedure (**condition A**): 2,6-dichloropyridinium tetrafluoroborate (0.2 mmol, 47 mg, 1.0 equiv), LiBF<sub>4</sub> (0.25 mmol, 4.7 mg, 0.25 equiv), dry CHCl<sub>3</sub> (1.0 mL), 1-(cyclohexylethynyl)-4-methylbenzene (0.2 mmol, 40 mg, 1.0 equiv) at 70 °C. The reaction mixture was quenched after 6 h, and the crude residue was purified by flash column chromatography (hexanes) to provide the title compound **12**. Pale yellow oil (34 mg, 78% yield, *Z/E* > 50 : 1).

<sup>1</sup>H NMR (500 MHz, CDCl<sub>3</sub>) δ 7.38 (d, *J* = 8.2 Hz, 2H), 7.15 (d, *J* = 8.2 Hz, 2H), 5.21 (dd, *J* = 38.4, 9.2 Hz, 1H), 2.69 – 2.56 (m, 1H), 2.35 (s, 3H), 1.82 – 1.70 (m, 4H), 1.70 – 1.64 (m, 1H), 1.41 – 1.30 (m, 2H), 1.26 – 1.10 (m, 3H).

<sup>13</sup>C NMR (126 MHz, CDCl<sub>3</sub>) δ 155.5 (d, *J*<sub>C-F</sub> = 245.1 Hz), 138.1, 130.2 (d, *J*<sub>C-F</sub> = 29.6 Hz), 129.0 (d, *J*<sub>C-F</sub> = 1.8 Hz), 123.8 (d, *J*<sub>C-F</sub> = 6.9 Hz), 111.1 (d, *J*<sub>C-F</sub> = 17.2 Hz), 33.8 (d, *J*<sub>C-F</sub> = 3.7 Hz), 33.2 (d, *J*<sub>C-F</sub> = 1.0 Hz), 26.0, 25.9, 21.2.

<sup>19</sup>F NMR (471 MHz, CDCl<sub>3</sub>) δ -121.5 (d, *J* = 38.4 Hz).

HRMS (ASAP) calcd for C<sub>15</sub>H<sub>19</sub>F [M]<sup>+</sup>: 218.1471, Found: 218.1480.

**(E)-1-(2-Cyclohexyl-1-fluorovinyl)-4-methylbenzene (13)**

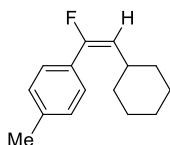

Prepared following the general procedure (**condition B**): 1-(cyclohexylethynyl)-4-methylbenzene (0.2 mmol, 40 mg, 1.0 equiv), dry CHCl<sub>3</sub> (1.0 mL), HBF<sub>4</sub>·Et<sub>2</sub>O (27 μL, 0.2 mmol, 1.0 equiv) at room temperature. The reaction mixture was quenched after 6 h, and the crude residue was purified by flash column chromatography (hexanes) to provide the title compound **13**. Pale yellow oil (16 mg, 36% yield, *E/Z* > 20 : 1).

<sup>1</sup>H NMR (500 MHz, CDCl<sub>3</sub>) δ 7.34 (d, *J* = 8.0 Hz, 2H), 7.20 (d, *J* = 7.9 Hz, 2H), 5.20 (dd, *J* = 23.0, 10.7 Hz, 1H), 2.38 (s, 3H), 2.31 – 2.20 (m, 1H), 1.80 – 1.68 (m, 4H), 1.67 – 1.60 (m, 1H), 1.28 – 1.14 (m, 5H).

<sup>13</sup>C NMR (126 MHz, CDCl<sub>3</sub>) δ 155.9 (d, *J*<sub>C-F</sub> = 239.9 Hz), 138.8, 129.6 (d, *J*<sub>C-F</sub> = 30.4 Hz), 128.9, 127.4 (d, *J*<sub>C-F</sub> = 4.9 Hz), 113.9 (d, *J*<sub>C-F</sub> = 22.3 Hz), 35.2 (d, *J*<sub>C-F</sub> = 7.6 Hz), 33.8 (d, *J*<sub>C-F</sub> = 2.2 Hz), 25.9, 25.7, 21.3.

<sup>19</sup>F NMR (471 MHz, CDCl<sub>3</sub>) δ -103.1 (d, *J* = 22.9 Hz).

HRMS (APCI) calcd for C<sub>15</sub>H<sub>19</sub>F [M]<sup>+</sup>: 218.1465, Found: 218.1456.



**(Z)-1-(2-Cyclohexyl-1-fluorovinyl)-2-fluorobenzene (14)**

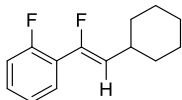

Prepared following the general procedure (**condition A**): 2,6-dichloropyridinium tetrafluoroborate (0.2 mmol, 47 mg, 1.0 equiv),  $\text{LiBF}_4$  (0.25 mmol, 4.7 mg, 0.25 equiv), dry  $\text{CHCl}_3$  (1.0 mL), 1-(cyclohexylethynyl)-2-fluorobenzene (0.2 mmol, 41 mg, 1.0 equiv) at 70 °C. The reaction mixture was quenched after 6 h, and the crude residue was purified by flash column chromatography (hexanes) to provide the title compound **14**. Pale yellow oil (34 mg, 77% yield,  $Z/E > 50 : 1$ ).

**$^1\text{H NMR}$**  (500 MHz,  $\text{CDCl}_3$ )  $\delta$  7.51 (td,  $J = 7.8, 1.7$  Hz, 1H), 7.29 – 7.21 (m, 1H), 7.14 (t,  $J = 7.6$  Hz, 1H), 7.07 (m, 1H), 5.48 (dd,  $J = 40.0, 9.3$  Hz, 1H), 2.75 – 2.59 (m, 1H), 1.86 – 1.70 (m, 4H), 1.70 – 1.62 (m, 1H), 1.42 – 1.30 (m, 2H), 1.27 – 1.14 (m, 3H).

**$^{13}\text{C NMR}$**  (126 MHz,  $\text{CDCl}_3$ )  $\delta$  159.2 (dd,  $J_{\text{C-F}} = 251.5, 5.4$  Hz), 150.0 (dd,  $J_{\text{C-F}} = 242.9, 5.5$  Hz), 129.4 (d,  $J_{\text{C-F}} = 8.6$  Hz), 127.0 (dd,  $J_{\text{C-F}} = 8.5, 2.4$  Hz), 124.0 (dd,  $J_{\text{C-F}} = 3.6, 1.1$  Hz), 121.0 (dd,  $J_{\text{C-F}} = 31.2, 11.0$  Hz), 118.2 (dd,  $J_{\text{C-F}} = 15.4, 12.3$  Hz), 116.0 (dd,  $J_{\text{C-F}} = 22.8, 2.4$  Hz), 34.1 (d,  $J_{\text{C-F}} = 4.1$  Hz), 33.0 (d,  $J_{\text{C-F}} = 1.1$  Hz), 26.0, 25.8.

**$^{19}\text{F NMR}$**  (471 MHz,  $\text{CDCl}_3$ )  $\delta$  -112.3 – -112.6 (m, 1F), -117.5 (dd,  $J = 40.0, 7.4$  Hz, 1F).

**HRMS** (ASAP) calcd for  $\text{C}_{14}\text{H}_{16}\text{F}_2$   $[\text{M}]^+$ : 222.1220, Found: 222.1217.

**(E)-1-(2-Cyclohexyl-1-fluorovinyl)-2-fluorobenzene (15)**

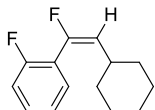

Prepared following the general procedure (**condition B**): 1-(cyclohexylethynyl)-2-fluorobenzene (0.2 mmol, 41 mg, 1.0 equiv), dry  $\text{CHCl}_3$  (1.0 mL),  $\text{HBF}_4 \cdot \text{Et}_2\text{O}$  (27  $\mu\text{L}$ , 0.2 mmol, 1.0 equiv) at room temperature. The reaction mixture was quenched after 6 h, and the crude residue was purified by flash column chromatography (hexanes) to provide the title compound **15**. Pale yellow oil (20 mg, 46% yield,  $E/Z > 20 : 1$ ).

**$^1\text{H NMR}$**  (500 MHz,  $\text{CDCl}_3$ )  $\delta$  7.45 – 7.30 (m, 2H), 7.15 (dt,  $J = 18.3, 8.2$  Hz, 2H), 5.38 (dd,  $J = 20.4, 10.9$  Hz, 1H), 1.96 – 1.84 (m, 1H), 1.74 – 1.64 (m, 4H), 1.63 – 1.56 (m, 1H), 1.23 – 1.09 (m, 5H).

**$^{13}\text{C NMR}$**  (126 MHz,  $\text{CDCl}_3$ )  $\delta$  160.0 (d,  $J_{\text{C-F}} = 249.3$  Hz), 150.9 (d,  $J_{\text{C-F}} = 242.7$  Hz), 131.1 (dd,  $J_{\text{C-F}} = 8.3, 1.9$  Hz), 130.9 (t,  $J_{\text{C-F}} = 2.6$  Hz), 123.9 (d,  $J_{\text{C-F}} = 3.5$  Hz), 120.3 (dd,  $J_{\text{C-F}} = 30.1, 15.4$  Hz), 116.9 (d,  $J_{\text{C-F}} = 19.8$  Hz), 116.0 (d,  $J_{\text{C-F}} = 21.9$  Hz), 35.5 (d,  $J_{\text{C-F}} = 5.6$  Hz), 33.4 (d,  $J_{\text{C-F}} = 2.3$  Hz), 25.8, 25.6.

**$^{19}\text{F NMR}$**  (471 MHz,  $\text{CDCl}_3$ )  $\delta$  -100.0 (dd,  $J = 20.3, 7.7$  Hz, 1F), -112.2 – -112.3 (m, 1F).

**HRMS** (ASAP) calcd for  $\text{C}_{14}\text{H}_{17}\text{F}_2$   $[\text{M}+\text{H}]^+$ : 223.1298, Found: 223.1304.

**(Z)-1-Chloro-2-(2-cyclohexyl-1-fluorovinyl)benzene (16)**

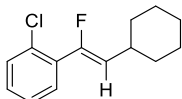

Prepared following the general procedure (**condition A**): 2,6-dichloropyridinium tetrafluoroborate (0.2 mmol, 47 mg, 1.0 equiv), LiBF<sub>4</sub> (0.25 mmol, 4.7 mg, 0.25 equiv), dry CHCl<sub>3</sub> (1.0 mL), 1-chloro-2-(cyclohexylethynyl)benzene (0.2 mmol, 44 mg, 1.0 equiv) at 90 °C. The reaction mixture was quenched after 6 h, and the crude residue was purified by flash column chromatography (hexanes) to provide the title compound **16**. Pale yellow oil (32 mg, 68% yield, *Z/E* > 20 : 1).

<sup>1</sup>H NMR (400 MHz, CDCl<sub>3</sub>) δ 7.51 – 7.36 (m, 2H), 7.30 – 7.25 (m, 2H), 5.22 (dd, *J* = 37.8, 9.3 Hz, 1H), 2.75 – 2.61 (m, 1H), 1.88 – 1.80 (m, 2H), 1.79 – 1.72 (m, 2H), 1.72 – 1.66 (m, 1H), 1.44 – 1.33 (m, 2H), 1.29 – 1.15 (m, 3H).

<sup>13</sup>C NMR (101 MHz, CDCl<sub>3</sub>) δ 153.0 (d, *J*<sub>C-F</sub> = 247.6 Hz), 132.4 (d, *J*<sub>C-F</sub> = 24.1 Hz), 132.2 (d, *J*<sub>C-F</sub> = 2.7 Hz), 130.3, 130.0 (d, *J*<sub>C-F</sub> = 4.9 Hz), 129.7 (d, *J*<sub>C-F</sub> = 1.0 Hz), 126.5, 118.0 (d, *J*<sub>C-F</sub> = 16.3 Hz), 34.0 (d, *J*<sub>C-F</sub> = 2.7 Hz), 33.0 (d, *J*<sub>C-F</sub> = 1.4 Hz), 26.0, 25.8.

<sup>19</sup>F NMR (376 MHz, CDCl<sub>3</sub>) δ -108.0 (d, *J* = 37.8 Hz).

HRMS (ASAP) calcd for C<sub>14</sub>H<sub>17</sub>ClF [M+H]<sup>+</sup>: 239.1003, Found: 239.0989.

#### (*Z*)-1-(2-Cyclohexyl-1-fluorovinyl)-2-methylbenzene (**17**)

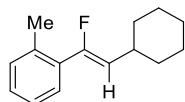

Prepared following the general procedure (**condition A**): 2,6-dichloropyridinium tetrafluoroborate (0.2 mmol, 47 mg, 1.0 equiv), LiBF<sub>4</sub> (0.25 mmol, 4.7 mg, 0.25 equiv), dry CHCl<sub>3</sub> (1.0 mL), 1-(cyclohexylethynyl)-2-methylbenzene (0.2 mmol, 40 mg, 1.0 equiv) at 70 °C. The reaction mixture was quenched after 6 h, and the crude residue was purified by flash column chromatography (hexanes) to provide the title compound **17**. Pale yellow oil (33 mg, 76% yield, *Z/E* > 50 : 1).

<sup>1</sup>H NMR (500 MHz, CDCl<sub>3</sub>) δ 7.32 (d, *J* = 7.5 Hz, 1H), 7.26 – 7.21 (m, 1H), 7.17 (m, 2H), 4.86 (dd, *J* = 37.5, 9.2 Hz, 1H), 2.69 – 2.58 (m, 1H), 2.39 (d, *J* = 3.2 Hz, 3H), 1.86 – 1.70 (m, 4H), 1.70 – 1.63 (m, 1H), 1.42 – 1.32 (m, 2H), 1.20 (m, 3H).

<sup>13</sup>C NMR (126 MHz, CDCl<sub>3</sub>) δ 156.4 (d, *J*<sub>C-F</sub> = 249.6 Hz), 136.4, 133.3 (d, *J*<sub>C-F</sub> = 26.7 Hz), 130.5, 128.8 (d, *J*<sub>C-F</sub> = 1.1 Hz), 128.7 (d, *J*<sub>C-F</sub> = 4.8 Hz), 125.5, 116.0 (d, *J*<sub>C-F</sub> = 17.3 Hz), 33.9 (d, *J*<sub>C-F</sub> = 2.6 Hz), 33.3 (d, *J*<sub>C-F</sub> = 1.2 Hz), 26.0, 25.8, 20.5 (d, *J*<sub>C-F</sub> = 3.3 Hz).

<sup>19</sup>F NMR (471 MHz, CDCl<sub>3</sub>) δ -104.9 (d, *J* = 37.5 Hz).

HRMS (ASAP) calcd for C<sub>15</sub>H<sub>20</sub>F [M+H]<sup>+</sup>: 219.1549, Found: 219.1537.

#### (*Z*)-1-(2-Cyclohexyl-1-fluorovinyl)-3-methoxybenzene (**18**)

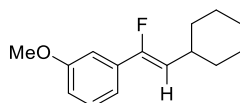

Prepared following the general procedure (**condition A**): 2,6-dichloropyridinium tetrafluoroborate (0.2 mmol, 47 mg, 1.0 equiv), LiBF<sub>4</sub> (0.25 mmol, 4.7 mg, 0.25 equiv), dry CHCl<sub>3</sub> (1.0 mL), 1-(cyclohexylethynyl)-3-methoxybenzene (0.2 mmol, 43 mg, 1.0 equiv) at 70 °C. The reaction mixture was quenched after 6 h, and the crude residue was purified by flash column chromatography (hexanes/EtOAc = 10 : 1) to provide the title compound **18**. Pale yellow oil (18 mg, 39% yield, *Z/E* > 50 : 1).

**<sup>1</sup>H NMR** (500 MHz, CDCl<sub>3</sub>) δ 7.25 (t, *J* = 8.2 Hz, 1H), 7.08 (d, *J* = 7.8 Hz, 1H), 7.05 – 6.99 (m, 1H), 6.84 (ddd, *J* = 8.2, 2.5, 0.7 Hz, 1H), 5.27 (dd, *J* = 38.1, 9.3 Hz, 1H), 3.82 (s, 3H), 2.70 – 2.56 (m, 1H), 1.82 – 1.71 (m, 4H), 1.70 – 1.65 (m, 1H), 1.40 – 1.30 (m, 2H), 1.25 – 1.13 (m, 3H).

**<sup>13</sup>C NMR** (126 MHz, CDCl<sub>3</sub>) δ 159.6 (d, *J*<sub>C-F</sub> = 2.1 Hz), 155.2 (d, *J*<sub>C-F</sub> = 245.5 Hz), 134.4 (d, *J*<sub>C-F</sub> = 29.3 Hz), 129.4 (d, *J*<sub>C-F</sub> = 2.0 Hz), 116.4 (d, *J*<sub>C-F</sub> = 6.9 Hz), 114.0, 112.4 (d, *J*<sub>C-F</sub> = 17.2 Hz), 109.4 (d, *J*<sub>C-F</sub> = 7.5 Hz), 55.3, 33.8 (d, *J*<sub>C-F</sub> = 3.7 Hz), 33.1 (d, *J*<sub>C-F</sub> = 1.1 Hz), 26.0, 25.8.

**<sup>19</sup>F NMR** (471 MHz, CDCl<sub>3</sub>) δ -121.2 (d, *J* = 38.1 Hz).

**HRMS** (APCI) calcd for C<sub>15</sub>H<sub>19</sub>FO [M]<sup>+</sup>: 234.1414, Found: 234.1411.

#### Methyl (Z)-3-(2-cyclohexyl-1-fluorovinyl)benzoate (**19**)

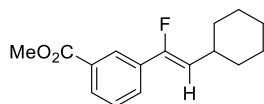

Prepared following the general procedure (**condition D**): 2,6-dichloropyridinium tetrafluoroborate (0.4 mmol, 94 mg, 2.0 equiv), dry DCE (2.0 mL), methyl 3-(cyclohexylethynyl)benzoate (0.2 mmol, 48 mg, 1.0 equiv) at 70 °C. The reaction mixture was quenched after 12 h, and the crude residue was purified by flash column chromatography (hexanes/EtOAc = 10 : 1) to provide the title compound **19**. Pale yellow oil (35 mg, 67% yield, *Z/E* > 50 : 1).

**<sup>1</sup>H NMR** (400 MHz, CDCl<sub>3</sub>) δ 8.15 (s, 1H), 7.95 (d, *J* = 7.8 Hz, 1H), 7.67 (d, *J* = 7.9 Hz, 1H), 7.42 (t, *J* = 7.8 Hz, 1H), 5.37 (dd, *J* = 38.0, 9.3 Hz, 1H), 3.93 (s, 3H), 2.73 – 2.56 (m, 1H), 1.81 – 1.65 (m, 5H), 1.40 – 1.31 (m, 2H), 1.26 – 1.13 (m, 3H).

**<sup>13</sup>C NMR** (101 MHz, CDCl<sub>3</sub>) δ 166.8, 154.5 (d, *J* = 245.3 Hz), 133.3 (d, *J* = 30.0 Hz), 130.4 (d, *J* = 2.2 Hz), 129.2, 128.5 (d, *J* = 1.8 Hz), 128.0 (d, *J* = 6.8 Hz), 125.0 (d, *J* = 7.1 Hz), 113.2 (d, *J* = 16.8 Hz), 52.2, 33.8 (d, *J* = 3.6 Hz), 33.0, 26.0, 25.8.

**<sup>19</sup>F NMR** (376 MHz, CDCl<sub>3</sub>) δ -121.9 (d, *J* = 38.0 Hz).

**HRMS** (ESI) calcd for C<sub>16</sub>H<sub>20</sub>FO<sub>2</sub> [M+H]<sup>+</sup>: 263.1442, Found: 263.1440.

#### (Z)-3-(2-Cyclohexyl-1-fluorovinyl)benzotrile (**20**)

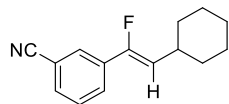

Prepared following the general procedure (**condition D**): 2,6-dichloropyridinium tetrafluoroborate (0.4 mmol, 94 mg, 2.0 equiv), dry DCE (2.0 mL), 3-(cyclohexylethynyl)benzotrile (0.2 mmol, 42 mg, 1.0 equiv) at 100 °C. The reaction mixture was quenched after 6 h, and the crude residue was purified by flash column chromatography (hexanes/EtOAc = 10 : 1) to provide the title compound **20**. Pale yellow oil (25 mg, 54% yield, *Z/E* = 13 : 1).

**<sup>1</sup>H NMR** (400 MHz, CDCl<sub>3</sub>) δ 7.76 (s, 1H), 7.70 (d, *J* = 8.1 Hz, 1H), 7.61 – 7.51 (m, 1H), 7.45 (t, *J* = 7.8 Hz, 1H), 5.37 (dd, *J* = 37.6, 9.3 Hz, 1H), 2.73 – 2.55 (m, 1H), 1.82 – 1.63 (m, 5H), 1.44 – 1.29 (m, 2H), 1.27 – 1.14 (m, 3H).

**<sup>13</sup>C NMR** (101 MHz, CDCl<sub>3</sub>) δ 153.4 (d, *J* = 245.4 Hz), 134.2 (d, *J* = 30.6 Hz), 131.5, 129.2 (d, *J* = 2.0 Hz), 127.8 (d, *J* = 6.8 Hz), 127.4 (d, *J* = 7.4 Hz), 118.5, 114.5 (d, *J* = 16.6 Hz), 112.8 (d, *J* = 2.3 Hz), 33.9 (d, *J* = 3.4 Hz), 32.9 (d, *J* = 1.3 Hz), 25.9, 25.7.

<sup>19</sup>F NMR (376 MHz, CDCl<sub>3</sub>) δ (*E*): -105.4 (d, *J* = 22.8 Hz), (*Z*): -122.6 (d, *J* = 37.6 Hz).

HRMS (ESI) calcd for C<sub>15</sub>H<sub>17</sub>FN [M+H]<sup>+</sup>: 230.1340, Found: 230.1339.

**(*Z*)-1-(2-Cyclohexyl-1-fluorovinyl)-4-(trifluoromethoxy)benzene (21)**

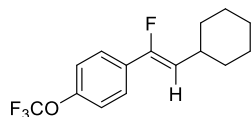

Prepared following the general procedure (**condition A**): 2,6-dichloropyridinium tetrafluoroborate (0.2 mmol, 47 mg, 1.0 equiv), LiBF<sub>4</sub> (0.25 mmol, 4.7 mg, 0.25 equiv), dry CHCl<sub>3</sub> (1.0 mL), 1-(cyclohexylethynyl)-4-(trifluoromethoxy)benzene (0.2 mmol, 54 mg, 1.0 equiv) at 90 °C. The reaction mixture was quenched after 6 h, and the crude residue was purified by flash column chromatography (hexanes) to provide the title compound **21**. Pale yellow oil (41 mg, 71% yield, *Z/E* > 50 : 1).

<sup>1</sup>H NMR (500 MHz, CDCl<sub>3</sub>) δ 7.54 – 7.48 (m, 2H), 7.19 (d, *J* = 8.7 Hz, 2H), 5.27 (dd, *J* = 37.9, 9.3 Hz, 1H), 2.71 – 2.58 (m, 1H), 1.82 – 1.71 (m, 4H), 1.68 (m, 1H), 1.42 – 1.31 (m, 2H), 1.27 – 1.12 (m, 3H).

<sup>13</sup>C NMR (126 MHz, CDCl<sub>3</sub>) δ 154.3 (d, *J*<sub>C-F</sub> = 245.2 Hz), 149.0 (d, *J*<sub>C-F</sub> = 1.7 Hz), 131.7 (d, *J*<sub>C-F</sub> = 30.1 Hz), 125.4 (d, *J*<sub>C-F</sub> = 6.9 Hz), 120.8, 120.4 (d, *J*<sub>C-F</sub> = 257.0 Hz), 112.9 (d, *J*<sub>C-F</sub> = 16.9 Hz), 33.9 (d, *J*<sub>C-F</sub> = 3.5 Hz), 33.1 (d, *J*<sub>C-F</sub> = 1.2 Hz), 26.0, 25.8.

<sup>19</sup>F NMR (471 MHz, CDCl<sub>3</sub>) δ -57.9 (s, 3F), -121.4 (d, *J* = 37.9 Hz, 1F).

HRMS (ASAP) calcd for C<sub>15</sub>H<sub>16</sub>F<sub>4</sub>O [M]<sup>+</sup>: 288.1137, Found: 288.1122.

**(*Z*)-4-(2-Cyclohexyl-1-fluorovinyl)phenyl trifluoromethanesulfonate (22)**

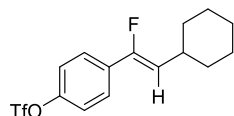

Prepared following the general procedure (**condition A**): 2,6-dichloropyridinium tetrafluoroborate (0.2 mmol, 47 mg, 1.0 equiv), LiBF<sub>4</sub> (0.25 mmol, 4.7 mg, 0.25 equiv), dry CHCl<sub>3</sub> (1.0 mL), 4-(cyclohexylethynyl)phenyl trifluoromethanesulfonate (0.2 mmol, 67 mg, 1.0 equiv) at 90 °C. The reaction mixture was quenched after 6 h, and the crude residue was purified by flash column chromatography (hexanes/EtOAc = 10 : 1) to provide the title compound **22**. White solid (52 mg, 74% yield, *Z/E* > 50 : 1).

<sup>1</sup>H NMR (400 MHz, CDCl<sub>3</sub>) δ 7.56 (d, *J* = 8.9 Hz, 2H), 7.25 (d, *J* = 8.8 Hz, 2H), 5.32 (dd, *J* = 37.7, 9.3 Hz, 1H), 2.72 – 2.57 (m, 1H), 1.82 – 1.65 (m, 5H), 1.41 – 1.30 (m, 2H), 1.27 – 1.13 (m, 3H).

<sup>13</sup>C NMR (101 MHz, CDCl<sub>3</sub>) δ 153.8 (d, *J*<sub>C-F</sub> = 245.3 Hz), 149.1, 133.3 (d, *J*<sub>C-F</sub> = 30.3 Hz), 125.6 (d, *J*<sub>C-F</sub> = 7.0 Hz), 121.4, 118.7 (d, *J*<sub>C-F</sub> = 320.9 Hz), 114.0 (d, *J*<sub>C-F</sub> = 16.8 Hz), 33.9 (d, *J*<sub>C-F</sub> = 3.4 Hz), 33.0 (d, *J*<sub>C-F</sub> = 1.3 Hz), 25.9, 25.7.

<sup>19</sup>F NMR (376 MHz, CDCl<sub>3</sub>) δ -72.8 (s, 3F), -121.7 (d, *J* = 37.7 Hz, 1F).

HRMS (ASAP) calcd for C<sub>15</sub>H<sub>16</sub>F<sub>4</sub>O<sub>3</sub>S [M]<sup>+</sup>: 352.0756, Found: 352.0769.

**(*Z*)-2-(4-(2-Cyclohexyl-1-fluorovinyl)phenyl)isoindoline-1,3-dione (23)**

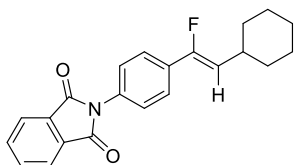

Prepared following the general procedure (**condition A**): 2,6-dichloropyridinium tetrafluoroborate (0.2 mmol, 47 mg, 1.0 equiv),  $\text{LiBF}_4$  (0.25 mmol, 4.7 mg, 0.25 equiv), dry  $\text{CHCl}_3$  (1.0 mL), 2-(4-(cyclohexylethynyl)phenyl)isoindoline-1,3-dione (0.2 mmol, 66 mg, 1.0 equiv) at 70 °C. The reaction mixture was quenched after 6 h, and the crude residue was purified by flash column chromatography (hexanes/EtOAc = 10 : 1) to provide the title compound **23**. Yellow solid (43 mg, 62% yield,  $Z/E > 50 : 1$ ).

**$^1\text{H NMR}$**  (300 MHz,  $\text{CDCl}_3$ )  $\delta$  7.96 (dd,  $J = 5.4, 3.0$  Hz, 2H), 7.80 (dd,  $J = 5.4, 3.0$  Hz, 2H), 7.62 (d,  $J = 8.6$  Hz, 2H), 7.45 (d,  $J = 8.5$  Hz, 2H), 5.33 (dd,  $J = 37.9, 9.2$  Hz, 1H), 2.75 – 2.56 (m, 1H), 1.84 – 1.62 (m, 5H), 1.41 – 1.30 (m, 2H), 1.27 – 1.13 (m, 3H).

**$^{13}\text{C NMR}$**  (126 MHz,  $\text{CDCl}_3$ )  $\delta$  167.1, 154.7 (d,  $J_{\text{C-F}} = 245.2$  Hz), 134.4, 132.6 (d,  $J_{\text{C-F}} = 29.8$  Hz), 131.7, 131.5, 126.3 (d,  $J_{\text{C-F}} = 1.7$  Hz), 124.5 (d,  $J_{\text{C-F}} = 6.9$  Hz), 123.8, 113.1 (d,  $J_{\text{C-F}} = 16.9$  Hz), 33.9 (d,  $J_{\text{C-F}} = 3.4$  Hz), 33.1, 26.0, 25.8.

**$^{19}\text{F NMR}$**  (376 MHz,  $\text{CDCl}_3$ )  $\delta$  -121.9 (d,  $J = 37.9$  Hz).

**HRMS** (ESI) calcd for  $\text{C}_{22}\text{H}_{21}\text{FNO}_2$   $[\text{M}+\text{H}]^+$ : 350.1551, Found: 350.1539.

#### Methyl (Z)-3-(2-cyclohexyl-1-fluorovinyl)-1-tosyl-1H-indole-6-carboxylate (**24**)

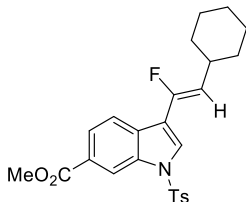

Prepared following the general procedure (**condition A**): 2,6-dichloropyridinium tetrafluoroborate (0.2 mmol, 47 mg, 1.0 equiv),  $\text{LiBF}_4$  (0.25 mmol, 4.7 mg, 0.25 equiv), dry  $\text{CHCl}_3$  (1.0 mL), methyl 3-(cyclohexylethynyl)-1-tosyl-1H-indole-6-carboxylate (0.2 mmol, 87 mg, 1.0 equiv) at 70 °C. The reaction mixture was quenched after 6 h, and the crude residue was purified by flash column chromatography (hexanes/EtOAc = 5 : 1) to provide the title compound **24**. Yellow solid (42 mg, 46% yield,  $Z/E > 50 : 1$ ).

**$^1\text{H NMR}$**  (500 MHz,  $\text{CDCl}_3$ )  $\delta$  8.69 (d,  $J = 1.2$  Hz, 1H), 7.97 (dd,  $J = 8.4, 1.4$  Hz, 1H), 7.83 (s, 1H), 7.82 (d,  $J = 8.4$  Hz, 2H), 7.70 (d,  $J = 8.4$  Hz, 1H), 7.26 (d,  $J = 8.3$  Hz, 2H), 5.21 (dd,  $J = 39.0, 9.3$  Hz, 1H), 3.97 (s, 3H), 2.72 – 2.61 (m, 1H), 2.35 (s, 3H), 1.84 – 1.71 (m, 4H), 1.42 – 1.31 (m, 2H), 1.28 – 1.15 (m, 4H).

**$^{13}\text{C NMR}$**  (126 MHz,  $\text{CDCl}_3$ )  $\delta$  167.0, 150.0 (d,  $J_{\text{C-F}} = 241.2$  Hz), 145.6, 134.8 (d,  $J_{\text{C-F}} = 1.0$  Hz), 134.7, 130.4 (d,  $J_{\text{C-F}} = 5.5$  Hz), 130.1, 127.0, 126.9, 126.1 (d,  $J_{\text{C-F}} = 6.3$  Hz), 124.8, 120.6, 116.1 (d,  $J_{\text{C-F}} = 34.0$  Hz), 115.4, 114.70 (d,  $J_{\text{C-F}} = 15.8$  Hz), 52.3, 33.8 (d,  $J_{\text{C-F}} = 3.2$  Hz), 33.2, 26.0, 25.8, 21.6.

**$^{19}\text{F NMR}$**  (282 MHz,  $\text{CDCl}_3$ )  $\delta$  -114.1 (d,  $J = 39.0$  Hz).

**HRMS** (ESI) calcd for  $\text{C}_{25}\text{H}_{27}\text{FNO}_4\text{S}$   $[\text{M}+\text{H}]^+$ : 456.1645, Found: 456.1633.

**Methyl (Z)-5-(2-cyclohexyl-1-fluorovinyl)furan-2-carboxylate (25)**

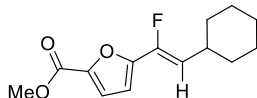

Prepared following the general procedure (**condition A**): 2,6-dichloropyridinium tetrafluoroborate (0.2 mmol, 47 mg, 1.0 equiv), LiBF<sub>4</sub> (0.25 mmol, 4.7 mg, 0.25 equiv), dry CHCl<sub>3</sub> (1.0 mL), methyl 5-(cyclohexylethynyl)furan-2-carboxylate (0.2 mmol, 46 mg, 1.0 equiv) at 70 °C. The reaction mixture was quenched after 6 h, and the crude residue was purified by flash column chromatography (hexanes/EtOAc = 5 : 1) to provide the title compound **25**. Pale yellow oil (18 mg, 35% yield, *Z/E* > 50 : 1).

**<sup>1</sup>H NMR** (500 MHz, CDCl<sub>3</sub>) δ 7.16 (d, *J* = 3.5 Hz, 1H), 6.48 (d, *J* = 2.9 Hz, 1H), 5.53 (dd, *J* = 38.2, 9.6 Hz, 1H), 3.89 (s, 3H), 2.66 – 2.54 (m, 1H), 1.79 – 1.71 (m, 4H), 1.70 – 1.64 (m, 1H), 1.37 – 1.29 (m, 2H), 1.24 – 1.17 (m, 3H).

**<sup>13</sup>C NMR** (126 MHz, CDCl<sub>3</sub>) δ 158.9, 150.7 (d, *J*<sub>C-F</sub> = 52.2 Hz), 147.2 (d, *J*<sub>C-F</sub> = 236.2 Hz), 143.9, 119.4, 114.7 (d, *J*<sub>C-F</sub> = 12.0 Hz), 107.8, 52.0, 33.6 (d, *J*<sub>C-F</sub> = 2.0 Hz), 32.8 (d, *J*<sub>C-F</sub> = 1.2 Hz), 25.9, 25.7.

**<sup>19</sup>F NMR** (471 MHz, CDCl<sub>3</sub>) δ -131.2 (d, *J* = 38.1 Hz).

**HRMS** (ESI) calcd for C<sub>14</sub>H<sub>18</sub>FO<sub>3</sub> [M+H]<sup>+</sup>: 253.1234 Found: 253.1227.

**Methyl (E)-5-(2-cyclohexyl-1-fluorovinyl)furan-2-carboxylate (26)**

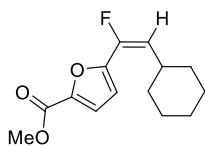

Prepared following the general procedure (**condition B**): methyl 5-(cyclohexylethynyl)furan-2-carboxylate (0.2 mmol, 46 mg, 1.0 equiv), dry CHCl<sub>3</sub> (1.0 mL), HBF<sub>4</sub>·Et<sub>2</sub>O (27 μL, 0.2 mmol, 1.0 equiv) at room temperature. The reaction mixture was quenched after 6 h, and the crude residue was purified by flash column chromatography (hexanes/EtOAc = 5 : 1) to provide the title compound **26**. Pale yellow oil (17 mg, 33% yield, *E/Z* > 20:1).

**<sup>1</sup>H NMR** (500 MHz, CDCl<sub>3</sub>) δ 7.19 (d, *J* = 3.3 Hz, 1H), 6.56 (d, *J* = 3.6 Hz, 1H), 5.39 (dd, *J* = 22.8, 10.3 Hz, 1H), 3.90 (s, 3H), 2.90 – 2.76 (m, 1H), 1.86 – 1.72 (m, 4H), 1.72 – 1.64 (m, 1H), 1.46 – 1.32 (m, 2H), 1.24 – 1.12 (m, 3H).

**<sup>13</sup>C NMR** (126 MHz, CDCl<sub>3</sub>) δ 158.8, 150.2 (d, *J*<sub>C-F</sub> = 50.5 Hz), 146.9 (d, *J*<sub>C-F</sub> = 230.2 Hz), 144.3, 118.7, 117.6 (d, *J*<sub>C-F</sub> = 17.2 Hz), 110.4, 52.0, 34.2 (d, *J*<sub>C-F</sub> = 6.6 Hz), 33.5 (d, *J*<sub>C-F</sub> = 2.1 Hz), 25.9, 25.7.

**<sup>19</sup>F NMR** (471 MHz, CDCl<sub>3</sub>) δ -123.6 (d, *J* = 22.7 Hz).

**HRMS** (ESI) calcd for C<sub>14</sub>H<sub>18</sub>FO<sub>3</sub> [M+H]<sup>+</sup>: 253.1234, Found: 253.1230.

**(Z)-1-Bromo-4-(1-fluoro-3-methylbut-1-en-1-yl)benzene (27)**

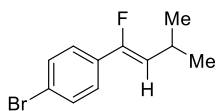

Prepared following the general procedure (**condition A**): 2,6-dichloropyridinium tetrafluoroborate (0.2 mmol, 47 mg, 1.0 equiv), LiBF<sub>4</sub> (0.25 mmol, 4.7 mg, 0.25 equiv), dry CHCl<sub>3</sub> (1.0 mL), 1-bromo-4-(3-methylbut-1-yn-1-yl)benzene (0.2 mmol, 45 mg, 1.0 equiv) at 70 °C. The reaction mixture was quenched after 6 h, and the crude residue was purified by flash column chromatography (hexanes) to provide the title compound **27**. Pale yellow oil (35 mg, 73% yield, *Z/E* > 50 : 1).

<sup>1</sup>H NMR (500 MHz, CDCl<sub>3</sub>) δ 7.47 (d, *J* = 8.5 Hz, 2H), 7.35 (d, *J* = 8.5 Hz, 2H), 5.26 (dd, *J* = 37.7, 9.3 Hz, 1H), 3.02 – 2.85 (m, 1H), 1.08 (d, *J* = 6.7 Hz, 6H).

<sup>13</sup>C NMR (126 MHz, CDCl<sub>3</sub>) δ 154.4 (d, *J*<sub>C-F</sub> = 245.1 Hz), 131.8 (d, *J*<sub>C-F</sub> = 29.9 Hz), 131.5 (d, *J*<sub>C-F</sub> = 1.9 Hz), 125.4 (d, *J*<sub>C-F</sub> = 6.9 Hz), 122.2, 114.2 (d, *J*<sub>C-F</sub> = 17.0 Hz), 24.4 (d, *J*<sub>C-F</sub> = 4.5 Hz), 22.9 (d, *J*<sub>C-F</sub> = 1.3 Hz).

<sup>19</sup>F NMR (471 MHz, CDCl<sub>3</sub>) δ -122.0 (d, *J* = 37.6 Hz).

HRMS (ASAP) calcd for C<sub>11</sub>H<sub>12</sub>BrF [M]<sup>+</sup>: 242.0106, Found: 242.0109.

#### (*E*)-1-Bromo-4-(1-fluoro-3-methylbut-1-en-1-yl)benzene (**28**)

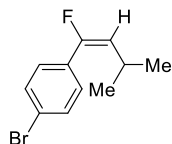

Prepared following the general procedure (**condition B**): 1-bromo-4-(3-methylbut-1-yn-1-yl)benzene (0.2 mmol, 45 mg, 1.0 equiv), dry CHCl<sub>3</sub> (1.0 mL), HBF<sub>4</sub>·Et<sub>2</sub>O (27 μL, 0.2 mmol, 1.0 equiv) at room temperature. The reaction mixture was quenched after 6 h, and the crude residue was purified by flash column chromatography (hexanes) to provide the title compound **28**. Pale yellow oil (23 mg, 47% yield, *E/Z* = 4 : 1).

<sup>1</sup>H NMR (500 MHz, CDCl<sub>3</sub>) δ 7.53 (d, *J* = 8.5 Hz, 2H), 7.32 (d, *J* = 8.5 Hz, 2H), 5.25 (dd, *J* = 22.7, 10.9 Hz, 1H), 2.63 – 2.48 (m, 1H), 1.07 (d, *J* = 6.8 Hz, 6H).

<sup>13</sup>C NMR (126 MHz, CDCl<sub>3</sub>) δ 154.4 (d, *J*<sub>C-F</sub> = 240.1 Hz), 131.5, 131.2 (d, *J*<sub>C-F</sub> = 30.7 Hz), 129.1 (d, *J*<sub>C-F</sub> = 4.8 Hz), 123.0, 116.5 (d, *J*<sub>C-F</sub> = 21.6 Hz), 25.9 (d, *J*<sub>C-F</sub> = 7.9 Hz), 23.5 (d, *J*<sub>C-F</sub> = 2.2 Hz).

<sup>19</sup>F NMR (471 MHz, CDCl<sub>3</sub>) δ (*E*): -104.47 (d, *J* = 22.6 Hz), (*Z*): -122.04 (d, *J* = 37.7 Hz).

HRMS (ASAP) calcd for C<sub>11</sub>H<sub>13</sub>BrF [M+H]<sup>+</sup>: 243.0185, Found: 243.0174.

#### (*Z*)-(2-Cyclobutyl-1-fluorovinyl)benzene (**29**)

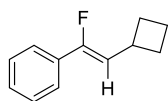

Prepared following the general procedure (**condition A**): 2,6-dichloropyridinium tetrafluoroborate (0.2 mmol, 47 mg, 1.0 equiv), LiBF<sub>4</sub> (0.25 mmol, 4.7 mg, 0.25 equiv), dry CHCl<sub>3</sub> (1.0 mL), (cyclobutylethynyl)benzene (0.2 mmol, 31 mg, 1.0 equiv) at 70 °C. The reaction mixture was quenched after 6 h, and the crude residue was purified by flash column chromatography (hexanes) to provide the title compound **29**. Pale yellow oil (24 mg, 68% yield, *Z/E* > 50 : 1).

<sup>1</sup>H NMR (500 MHz, CDCl<sub>3</sub>) δ 7.52 – 7.46 (m, 2H), 7.35 (m, 2H), 7.29 (m, 1H), 5.50 (dd, *J* = 37.8, 8.8 Hz, 1H), 3.57 – 3.42 (m, 1H), 2.34 – 2.15 (m, 2H), 2.00 – 1.90 (m, 3H), 1.89 – 1.81 (m, 1H).

<sup>13</sup>C NMR (126 MHz, CDCl<sub>3</sub>) δ 155.0 (d, *J*<sub>C-F</sub> = 246.0 Hz), 132.7 (d, *J*<sub>C-F</sub> = 29.1 Hz), 128.4 (d, *J*<sub>C-F</sub> = 2.0 Hz), 128.3, 123.8 (d, *J*<sub>C-F</sub> = 7.0 Hz), 111.3 (d, *J*<sub>C-F</sub> = 17.2 Hz), 31.1 (d, *J*<sub>C-F</sub> = 4.0 Hz), 29.8 (d, *J*<sub>C-F</sub> = 2.2 Hz), 19.1.

<sup>19</sup>F NMR (471 MHz, CDCl<sub>3</sub>) δ -120.9 (d, *J* = 37.8 Hz).

HRMS (ASAP) calcd for C<sub>12</sub>H<sub>14</sub>F [M+H]<sup>+</sup>: 177.1080, Found: 177.1078.

**(*E*)-(2-Cyclobutyl-1-fluorovinyl)benzene (30)**

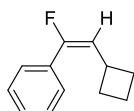

Prepared following the general procedure (**condition B**): (cyclobutylethynyl)benzene (0.2 mmol, 31 mg, 1.0 equiv), dry CHCl<sub>3</sub> (1.0 mL), HBF<sub>4</sub>·Et<sub>2</sub>O (27 μL, 0.2 mmol, 1.0 equiv) at room temperature. The reaction mixture was quenched after 6 h, and the crude residue was purified by flash column chromatography (hexanes) to provide the title compound **30**. Pale yellow oil (14 mg, 40% yield, *E/Z* = 10 : 1).

<sup>1</sup>H NMR (500 MHz, CDCl<sub>3</sub>) δ 7.45 – 7.31 (m, 5H), 5.52 (dd, *J* = 21.8, 9.8 Hz, 1H), 3.26 – 3.09 (m, 1H), 2.30 – 2.14 (m, 2H), 1.99 – 1.80 (m, 4H).

<sup>13</sup>C NMR (126 MHz, CDCl<sub>3</sub>) δ 155.8 (d, *J*<sub>C-F</sub> = 242.0 Hz), 132.2 (d, *J*<sub>C-F</sub> = 29.8 Hz), 128.9 (d, *J*<sub>C-F</sub> = 0.9 Hz), 128.1, 127.4 (d, *J*<sub>C-F</sub> = 5.1 Hz), 113.8 (d, *J*<sub>C-F</sub> = 22.6 Hz), 32.6 (d, *J*<sub>C-F</sub> = 7.5 Hz), 30.1 (d, *J*<sub>C-F</sub> = 2.2 Hz), 18.7 (d, *J*<sub>C-F</sub> = 1.2 Hz).

<sup>19</sup>F NMR (471 MHz, CDCl<sub>3</sub>) δ (*E*): -105.0 (d, *J* = 21.8 Hz), (*Z*): -120.8 (d, *J* = 37.8 Hz).

HRMS (ASAP) calcd for C<sub>12</sub>H<sub>14</sub>F [M+H]<sup>+</sup>: 177.1071, Found: 177.1070.

**(*Z*)-1-Bromo-4-(2-cyclopentyl-1-fluorovinyl)benzene (31)**

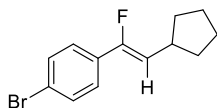

Prepared following the general procedure (**condition A**): 2,6-dichloropyridinium tetrafluoroborate (0.2 mmol, 47 mg, 1.0 equiv), LiBF<sub>4</sub> (0.25 mmol, 4.7 mg, 0.25 equiv), dry CHCl<sub>3</sub> (1.0 mL), 1-bromo-4-(cyclopentylethynyl)benzene (0.2 mmol, 50 mg, 1.0 equiv) at 70 °C. The reaction mixture was quenched after 6 h, and the crude residue was purified by flash column chromatography (hexanes) to provide the title compound **31**. Pale yellow oil (41 mg, 76% yield, *Z/E* > 50 : 1).

<sup>1</sup>H NMR (500 MHz, CDCl<sub>3</sub>) δ 7.46 (d, *J* = 8.4 Hz, 2H), 7.38 – 7.32 (m, 2H), 5.35 (dd, *J* = 37.5, 9.3 Hz, 1H), 3.09 – 2.93 (m, 1H), 1.99 – 1.83 (m, 2H), 1.77 – 1.67 (m, 2H), 1.67 – 1.57 (m, 2H), 1.37 – 1.28 (m, 2H).

<sup>13</sup>C NMR (126 MHz, CDCl<sub>3</sub>) δ 155.0 (d, *J*<sub>C-F</sub> = 244.9 Hz), 131.8 (d, *J*<sub>C-F</sub> = 29.9 Hz), 131.5 (d, *J*<sub>C-F</sub> = 1.9 Hz), 125.4 (d, *J*<sub>C-F</sub> = 6.9 Hz), 122.2, 112.2 (d, *J*<sub>C-F</sub> = 17.0 Hz), 35.5 (d, *J*<sub>C-F</sub> = 3.7 Hz), 33.6 (d, *J*<sub>C-F</sub> = 1.1 Hz), 25.2.

<sup>19</sup>F NMR (471 MHz, CDCl<sub>3</sub>) δ -122.2 (d, *J* = 37.6 Hz).

HRMS (ASAP) calcd for C<sub>13</sub>H<sub>14</sub>BrF [M]<sup>+</sup>: 268.0263, Found: 268.0275.

**(*Z*)-(3-Cyclopentyl-1-fluoroprop-1-en-1-yl)benzene (32)**



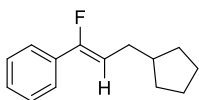

Prepared following the general procedure (**condition A**): 2,6-dichloropyridinium tetrafluoroborate (0.2 mmol, 47 mg, 1.0 equiv), LiBF<sub>4</sub> (0.25 mmol, 4.7 mg, 0.25 equiv), dry CHCl<sub>3</sub> (1.0 mL), (3-cyclopentylprop-1-yn-1-yl)benzene (0.2 mmol, 37 mg, 1.0 equiv) at 70 °C. The reaction mixture was quenched after 6 h, and the crude residue was purified by flash column chromatography (hexanes) to provide the title compound **32**. Pale yellow oil (30 mg, 73% yield, *Z/E* > 50 : 1).

<sup>1</sup>H NMR (500 MHz, CDCl<sub>3</sub>) δ 7.53 – 7.47 (m, 2H), 7.38 – 7.32 (m, 2H), 7.30 (ddd, *J* = 7.3, 3.7, 1.3 Hz, 1H), 5.42 (dt, *J* = 37.5, 7.7 Hz, 1H), 2.29 (td, *J* = 7.5, 1.8 Hz, 2H), 2.00 – 1.89 (m, 1H), 1.85 – 1.73 (m, 2H), 1.70 – 1.59 (m, 2H), 1.59 – 1.49 (m, 2H), 1.28 – 1.17 (m, 2H).

<sup>13</sup>C NMR (126 MHz, CDCl<sub>3</sub>) δ 156.7 (d, *J*<sub>C-F</sub> = 245.3 Hz), 132.9 (d, *J*<sub>C-F</sub> = 29.4 Hz), 128.4 (d, *J*<sub>C-F</sub> = 2.0 Hz), 128.2, 123.8 (d, *J*<sub>C-F</sub> = 6.9 Hz), 105.6 (d, *J*<sub>C-F</sub> = 17.7 Hz), 40.1 (d, *J*<sub>C-F</sub> = 1.5 Hz), 32.3, 30.1 (d, *J*<sub>C-F</sub> = 4.2 Hz), 25.2.

<sup>19</sup>F NMR (471 MHz, CDCl<sub>3</sub>) δ -121.1 (d, *J* = 37.5 Hz).

HRMS (ASAP) calcd for C<sub>14</sub>H<sub>17</sub>F [M]<sup>+</sup>: 204.1314, Found: 204.1326.

#### (*Z*)-4-(2-Fluoro-2-phenylvinyl)-1-tosylpiperidine (**33**)

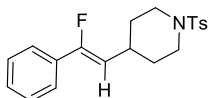

Prepared following the general procedure (**condition A**): 2,6-dichloropyridinium tetrafluoroborate (0.2 mmol, 47 mg, 1.0 equiv), LiBF<sub>4</sub> (0.25 mmol, 4.7 mg, 0.25 equiv), dry CHCl<sub>3</sub> (1.0 mL), 4-(phenylethynyl)-1-tosylpiperidine (0.2 mmol, 68 mg, 1.0 equiv) at 70 °C. The reaction mixture was quenched after 6 h, and the crude residue was purified by flash column chromatography (hexanes/EtOAc = 10 : 1) to provide the title compound **33**. Pale yellow oil (43 mg, 60% yield, *Z/E* = 33 : 1).

<sup>1</sup>H NMR (500 MHz, CDCl<sub>3</sub>) δ 7.69 – 7.64 (m, 2H), 7.48 – 7.43 (m, 2H), 7.36 – 7.29 (m, 5H), 5.21 (dd, *J* = 37.2, 9.0 Hz, 1H), 3.79 (d, *J* = 11.7 Hz, 2H), 2.59 – 2.51 (m, 1H), 2.45 (s, 3H), 2.35 (td, *J* = 11.9, 2.4 Hz, 2H), 1.85 – 1.78 (m, 2H), 1.61 – 1.52 (m, 2H).

<sup>13</sup>C NMR (126 MHz, CDCl<sub>3</sub>) δ 156.68 (d, *J*<sub>C-F</sub> = 247.7 Hz), 143.5, 133.0, 132.1 (d, *J*<sub>C-F</sub> = 28.9 Hz), 129.6, 128.8, 128.4 (d, *J*<sub>C-F</sub> = 1.8 Hz), 127.7, 124.0 (d, *J*<sub>C-F</sub> = 7.0 Hz), 109.0 (d, *J*<sub>C-F</sub> = 16.7 Hz), 46.1, 31.4 (d, *J*<sub>C-F</sub> = 1.0 Hz), 31.3 (d, *J*<sub>C-F</sub> = 4.4 Hz), 21.5.

<sup>19</sup>F NMR (376 MHz, CDCl<sub>3</sub>) δ (*E*): -99.1 (d, *J* = 21.6 Hz), (*Z*): -119.3 (d, *J* = 37.2 Hz).

HRMS (ASAP) calcd for C<sub>20</sub>H<sub>23</sub>FNO<sub>2</sub>S [M+H]<sup>+</sup>: 360.1434, Found: 360.1423.

#### (*Z*)-4-(2-Fluoro-2-phenylvinyl)tetrahydro-2H-pyran (**34**)

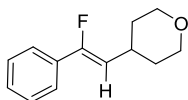

Prepared following the general procedure (**condition A**): 2,6-dichloropyridinium tetrafluoroborate (0.4

mmol, 94 mg, 1.0 equiv), dry  $\text{CHCl}_3$  (1.0 mL), 4-(phenylethynyl)tetrahydro-2H-pyran (0.2 mmol, 37 mg, 1.0 equiv) and  $\text{Et}_2\text{O}\cdot\text{BF}_3$  (0.2 mmol, 25  $\mu\text{L}$ , 1.0 equiv) at 90 °C. The reaction mixture was quenched after 6 h, and the crude residue was purified by flash column chromatography (hexanes) to provide the title compound **34**. Pale yellow oil (26 mg, 64% yield,  $Z/E = 3.6 : 1$ ).

$^1\text{H NMR}$  (500 MHz,  $\text{CDCl}_3$ )  $\delta$  7.45 – 7.31 (m, 3H), 7.30 – 7.21 (m, 2H), 5.30 – 5.07 (m, 1H), 3.94 – 3.84 (m, 2H), 3.43 (td,  $J = 11.7, 1.7$  Hz, 1.6H), 3.31 (td,  $J = 11.6, 1.9$  Hz, 0.4H), 2.91 – 2.70 (m, 0.8H), 2.48 – 2.39 (m, 0.2H), 1.66 – 1.55 (m, 2H), 1.53 – 1.42 (m, 2H).

$^{13}\text{C NMR}$  (126 MHz,  $\text{CDCl}_3$ )  $\delta$  156.6 (d,  $J_{\text{C-F}} = 242.8$  Hz), 156.2 (d,  $J_{\text{C-F}} = 247.0$  Hz), 132.5 (d,  $J_{\text{C-F}} = 29.1$  Hz), 132.0 (d,  $J_{\text{C-F}} = 29.9$  Hz), 129.2 (d,  $J_{\text{C-F}} = 1.2$  Hz), 128.6, 128.41 (d,  $J_{\text{C-F}} = 2.0$  Hz), 128.36, 127.5 (d,  $J_{\text{C-F}} = 4.7$  Hz), 123.9 (d,  $J_{\text{C-F}} = 7.1$  Hz), 112.7 (d,  $J_{\text{C-F}} = 23.4$  Hz), 110.0 (d,  $J_{\text{C-F}} = 16.7$  Hz), 67.6, 67.3, 33.3 (d,  $J_{\text{C-F}} = 2.3$  Hz), 32.7 (d,  $J_{\text{C-F}} = 1.3$  Hz), 32.6 (d,  $J_{\text{C-F}} = 8.1$  Hz), 31.2 (d,  $J_{\text{C-F}} = 4.3$  Hz).

$^{19}\text{F NMR}$  (471 MHz,  $\text{CDCl}_3$ )  $\delta$  (E): -100.9 (dd,  $J = 22.2, 1.7$  Hz, 0.22F), (Z): -120.2 (d,  $J = 37.5$  Hz, 0.79F).

HRMS (ESI) calcd for  $\text{C}_{13}\text{H}_{16}\text{FO}$   $[\text{M}+\text{H}]^+$ : 207.1180, Found: 207.1174.

#### (Z)-1-Fluoroprop-1-ene-1,3-diyl)dibenzene (35)

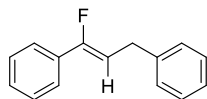

Prepared following the general procedure (**condition A**): 2,6-dichloropyridinium tetrafluoroborate (0.2 mmol, 47 mg, 1.0 equiv),  $\text{LiBF}_4$  (0.25 mmol, 4.7 mg, 0.25 equiv), dry  $\text{CHCl}_3$  (1.0 mL), prop-1-yne-1,3-diyl)dibenzene (0.2 mmol, 39 mg, 1.0 equiv) at 70 °C. The reaction mixture was quenched after 6 h, and the crude residue was purified by flash column chromatography (hexanes) to provide the title compound **35**. Pale yellow oil (32 mg, 76% yield,  $Z/E > 50 : 1$ ).

$^1\text{H NMR}$  (500 MHz,  $\text{CDCl}_3$ )  $\delta$  7.54 (d,  $J = 7.1$  Hz, 2H), 7.39 – 7.26 (m, 7H), 7.25 – 7.20 (m, 1H), 5.60 (dt,  $J = 36.3, 7.7$  Hz, 1H), 3.65 (dd,  $J = 7.7, 1.1$  Hz, 2H).

$^{13}\text{C NMR}$  (126 MHz,  $\text{CDCl}_3$ )  $\delta$  157.0 (d,  $J_{\text{C-F}} = 247.5$  Hz), 140.2, 132.4 (d,  $J_{\text{C-F}} = 29.0$  Hz), 128.6, 128.5, 128.43, 128.42, 126.2, 124.0 (d,  $J_{\text{C-F}} = 7.0$  Hz), 104.9 (d,  $J_{\text{C-F}} = 17.3$  Hz), 30.4 (d,  $J_{\text{C-F}} = 5.8$  Hz).

$^{19}\text{F NMR}$  (471 MHz,  $\text{CDCl}_3$ )  $\delta$  -121.0 (d,  $J = 36.3$  Hz).

HRMS (ASAP) calcd for  $\text{C}_{15}\text{H}_{13}\text{F}$   $[\text{M}]^+$ : 212.1001, Found: 212.1008.

#### (3r,5r,7r)-1-((Z)-3-Fluoro-3-phenylallyl)adamantane (36)

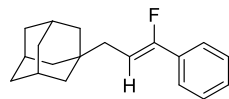

Prepared following the general procedure (**condition A**): 2,6-dichloropyridinium tetrafluoroborate (0.2 mmol, 47 mg, 1.0 equiv),  $\text{LiBF}_4$  (0.25 mmol, 4.7 mg, 0.25 equiv), dry  $\text{CHCl}_3$  (1.0 mL), (3r,5r,7r)-1-(3-phenylprop-2-yn-1-yl)adamantane (0.2 mmol, 50 mg, 1.0 equiv) at 70 °C. The reaction mixture was quenched after 6 h, and the crude residue was purified by flash column chromatography (hexanes) to provide the title compound **36**. Pale yellow oil (36 mg, 67% yield,  $Z/E > 50 : 1$ ).

**<sup>1</sup>H NMR** (500 MHz, CDCl<sub>3</sub>) δ 7.58 – 7.50 (m, 2H), 7.37 (t, *J* = 7.7 Hz, 2H), 7.34 – 7.29 (m, 1H), 5.48 (dt, *J* = 37.3, 8.2 Hz, 1H), 2.06 (dd, *J* = 8.2, 1.8 Hz, 2H), 1.98 (s, 3H), 1.72 (d, *J* = 12.1 Hz, 3H), 1.68 – 1.62 (m, 3H), 1.58 (d, *J* = 2.5 Hz, 6H).

**<sup>13</sup>C NMR** (126 MHz, CDCl<sub>3</sub>) δ 157.3 (d, *J*<sub>C-F</sub> = 245.9 Hz), 132.9 (d, *J*<sub>C-F</sub> = 29.6 Hz), 128.4 (d, *J*<sub>C-F</sub> = 2.0 Hz), 128.2, 123.9 (d, *J*<sub>C-F</sub> = 6.9 Hz), 102.1 (d, *J*<sub>C-F</sub> = 17.4 Hz), 42.3, 38.6 (d, *J*<sub>C-F</sub> = 3.3 Hz), 37.1, 33.6 (d, *J*<sub>C-F</sub> = 1.6 Hz), 28.7.

**<sup>19</sup>F NMR** (471 MHz, CDCl<sub>3</sub>) δ -120.4 (d, *J* = 37.3 Hz).

**HRMS** (ASAP) calcd for C<sub>19</sub>H<sub>23</sub>F [M]<sup>+</sup>: 270.1784, Found: 270.1774.

**(*Z*)-(1-Fluoro-3-methyldec-1-en-1-yl)benzene (37)**

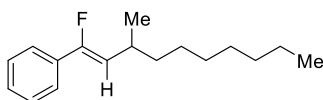

Prepared following the general procedure (**condition A**): 2,6-dichloropyridinium tetrafluoroborate (0.2 mmol, 47 mg, 1.0 equiv), LiBF<sub>4</sub> (0.25 mmol, 4.7 mg, 0.25 equiv), dry CHCl<sub>3</sub> (1.0 mL), (3-methyldec-1-en-1-yl)benzene (0.2 mmol, 46 mg, 1.0 equiv) at 70 °C. The reaction mixture was quenched after 6 h, and the crude residue was purified by flash column chromatography (hexanes) to provide the title compound **37**. Pale yellow oil (36 mg, 73% yield, *Z/E* > 50 : 1).

**<sup>1</sup>H NMR** (500 MHz, CDCl<sub>3</sub>) δ 7.54 – 7.48 (m, 2H), 7.36 (dd, *J* = 11.0, 4.4 Hz, 2H), 7.33 – 7.28 (m, 1H), 5.21 (dd, *J* = 37.8, 9.7 Hz, 1H), 2.88 – 2.74 (m, 1H), 1.44 – 1.22 (m, 12H), 1.08 (d, *J* = 6.8 Hz, 3H), 0.88 (t, *J* = 7.0 Hz, 3H).

**<sup>13</sup>C NMR** (126 MHz, CDCl<sub>3</sub>) δ 155.8 (d, *J*<sub>C-F</sub> = 244.9 Hz), 132.9 (d, *J*<sub>C-F</sub> = 29.5 Hz), 128.3 (d, *J*<sub>C-F</sub> = 2.0 Hz), 128.2, 123.8 (d, *J*<sub>C-F</sub> = 7.0 Hz), 112.5 (d, *J*<sub>C-F</sub> = 17.4 Hz), 37.6 (d, *J*<sub>C-F</sub> = 1.4 Hz), 31.9, 29.7, 29.5 (d, *J*<sub>C-F</sub> = 3.9 Hz), 29.3, 27.5, 22.7, 21.1 (d, *J*<sub>C-F</sub> = 1.3 Hz), 14.1.

**<sup>19</sup>F NMR** (471 MHz, CDCl<sub>3</sub>) δ -121.9 (d, *J* = 37.8 Hz).

**HRMS** (ASAP) calcd for C<sub>17</sub>H<sub>25</sub>F [M]<sup>+</sup>: 248.1940, Found: 248.1946.

**(*Z*)-(1-Fluorohex-1-en-1-yl)benzene (38)**

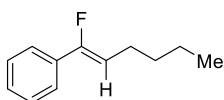

Prepared following the general procedure (**condition A**): 2,6-dichloropyridinium tetrafluoroborate (0.2 mmol, 47 mg, 1.0 equiv), LiBF<sub>4</sub> (0.25 mmol, 4.7 mg, 0.25 equiv), dry CHCl<sub>3</sub> (1.0 mL), hex-1-en-1-ylbenzene (0.2 mmol, 32 mg, 1.0 equiv) at 70 °C. The reaction mixture was quenched after 6 h, and the crude residue was purified by flash column chromatography (hexanes) to provide the title compound **38**. Pale yellow oil (24 mg, 66% yield, *Z/E* > 50 : 1).

**<sup>1</sup>H NMR** (500 MHz, CDCl<sub>3</sub>) δ 7.52 – 7.47 (m, 2H), 7.35 (t, *J* = 7.7 Hz, 2H), 7.32 – 7.27 (m, 1H), 5.40 (dt, *J* = 37.6, 7.6 Hz, 1H), 2.33 – 2.25 (m, 2H), 1.49 – 1.34 (m, 4H), 0.93 (t, *J* = 7.2 Hz, 3H).

**<sup>13</sup>C NMR** (126 MHz, CDCl<sub>3</sub>) δ 156.6 (d, *J*<sub>C-F</sub> = 245.3 Hz), 132.9 (d, *J*<sub>C-F</sub> = 29.4 Hz), 128.4 (d, *J*<sub>C-F</sub> = 2.0 Hz), 128.2, 123.8 (d, *J*<sub>C-F</sub> = 7.0 Hz), 106.3 (d, *J*<sub>C-F</sub> = 17.8 Hz), 31.6 (d, *J*<sub>C-F</sub> = 1.5 Hz), 23.8 (d, *J*<sub>C-F</sub> = 4.9 Hz), 22.3, 13.9.

**<sup>19</sup>F NMR** (471 MHz, CDCl<sub>3</sub>) δ -121.4 (d, *J* = 37.6 Hz).

HRMS (ASAP) calcd for C<sub>12</sub>H<sub>13</sub>F [M]<sup>+</sup>: 178.1158, Found: 178.1152.

**(E)-1-(1-Fluorohex-1-en-1-yl)benzene (39)**

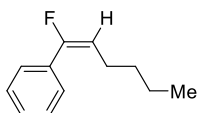

Prepared following the general procedure (**condition B**): hex-1-en-1-ylbenzene (0.2 mmol, 32 mg, 1.0 equiv), dry CHCl<sub>3</sub> (1.0 mL), HBF<sub>4</sub>·Et<sub>2</sub>O (27 μL, 0.2 mmol, 1.0 equiv) at room temperature. The reaction mixture was quenched after 6 h, and the crude residue was purified by flash column chromatography (hexanes) to provide the title compound **39**. Pale yellow oil (14 mg, 40% yield, *E/Z* = 6 : 1).

<sup>1</sup>H NMR (300 MHz, CDCl<sub>3</sub>) δ 7.53 – 7.29 (m, 5H), 5.39 (dt, *J* = 22.8, 7.9 Hz, 1H), 2.20 (q, *J* = 7.0 Hz, 2H), 1.50 – 1.27 (m, 4H), 0.89 (t, *J* = 7.1 Hz, 3H).

<sup>13</sup>C NMR (126 MHz, CDCl<sub>3</sub>) δ 156.5 (d, *J*<sub>C-F</sub> = 239.4 Hz), 132.2 (d, *J*<sub>C-F</sub> = 30.1 Hz), 128.8, 128.2, 127.6 (d, *J*<sub>C-F</sub> = 5.0 Hz), 108.6 (d, *J*<sub>C-F</sub> = 24.2 Hz), 32.3 (d, *J*<sub>C-F</sub> = 1.7 Hz), 25.7 (d, *J*<sub>C-F</sub> = 7.9 Hz), 22.2, 13.8.

<sup>19</sup>F NMR (282 MHz, CDCl<sub>3</sub>) δ (*E*): -102.6 (d, *J* = 22.8 Hz), (*Z*): -121.4 (d, *J* = 37.5 Hz).

HRMS (ASAP) calcd for C<sub>12</sub>H<sub>13</sub>F [M]<sup>+</sup>: 178.1163, Found: 178.1167.

**(Z)-1-Bromo-4-(6-chloro-1-fluorohex-1-en-1-yl)benzene (40)**

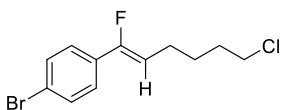

Prepared following the general procedure (**condition A**): 2,6-dichloropyridinium tetrafluoroborate (0.2 mmol, 47 mg, 1.0 equiv), LiBF<sub>4</sub> (0.25 mmol, 4.7 mg, 0.25 equiv), dry DCE (1.0 mL), 1-bromo-4-(6-chlorohex-1-en-1-yl)benzene (0.2 mmol, 54 mg, 1.0 equiv) at 70 °C. The reaction mixture was quenched after 6 h, and the crude residue was purified by flash column chromatography (hexanes) to provide the title compound **40**. Pale yellow oil (39 mg, 67% yield, *Z/E* > 50 : 1).

<sup>1</sup>H NMR (300 MHz, CDCl<sub>3</sub>) δ 7.48 (d, *J* = 8.3 Hz, 2H), 7.35 (d, *J* = 8.6 Hz, 2H), 5.39 (dt, *J* = 36.9, 7.6 Hz, 1H), 3.57 (t, *J* = 6.6 Hz, 2H), 2.31 (qd, *J* = 7.5, 1.8 Hz, 2H), 1.93 – 1.76 (m, 2H), 1.70 – 1.55 (m, 2H).

<sup>13</sup>C NMR (126 MHz, CDCl<sub>3</sub>) δ 156.3 (d, *J*<sub>C-F</sub> = 246.1 Hz), 131.6 (d, *J*<sub>C-F</sub> = 2.0 Hz), 131.4 (d, *J*<sub>C-F</sub> = 3.2 Hz), 125.4 (d, *J*<sub>C-F</sub> = 6.9 Hz), 122.5, 106.1 (d, *J*<sub>C-F</sub> = 17.6 Hz), 44.8, 32.0, 26.5 (d, *J*<sub>C-F</sub> = 1.7 Hz), 23.4 (d, *J*<sub>C-F</sub> = 4.9 Hz).

<sup>19</sup>F NMR (471 MHz, CDCl<sub>3</sub>) δ -120.6 (d, *J* = 36.9 Hz).

HRMS (ASAP) calcd for C<sub>12</sub>H<sub>13</sub>BrClF [M]<sup>+</sup>: 289.9873, Found: 289.9860.

**Methyl (Z)-6-fluoro-6-phenylhex-5-enoate (41)**

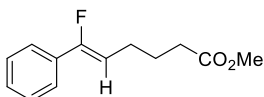

Prepared following the general procedure (**condition A**): 2,6-dichloropyridinium tetrafluoroborate (0.2 mmol, 47 mg, 1.0 equiv), LiBF<sub>4</sub> (0.25 mmol, 4.7 mg, 0.25 equiv), dry CHCl<sub>3</sub> (1.0 mL), methyl 6-phenylhex-5-ynoate (0.2 mmol, 40 mg, 1.0 equiv) at 70 °C. The reaction mixture was quenched after 12 h, and the crude residue was purified by flash column chromatography (hexanes/EtOAc = 10 : 1) to provide the title compound **41**. Pale yellow oil (23 mg, 52% yield, *Z/E* = 33 : 1).

<sup>1</sup>H NMR (300 MHz, CDCl<sub>3</sub>) δ 7.55 – 7.42 (m, 2H), 7.41 – 7.27 (m, 3H), 5.37 (dt, *J* = 37.0, 7.7 Hz, 1H), 3.67 (s, 3H), 2.47 – 2.25 (m, 4H), 1.88 – 1.75 (m, 2H).

<sup>13</sup>C NMR (101 MHz, CDCl<sub>3</sub>) δ 173.9, 157.3 (d, *J* = 246.8 Hz), 132.5 (d, *J* = 29.1 Hz), 128.5, 128.4 (d, *J* = 2.0 Hz), 123.9 (d, *J* = 7.0 Hz), 104.8 (d, *J* = 17.6 Hz), 51.5, 33.4, 24.6 (d, *J* = 1.8 Hz), 23.5 (d, *J* = 5.1 Hz).

<sup>19</sup>F NMR (282 MHz, CDCl<sub>3</sub>) δ (*E*): -100.6 (d, *J* = 22.1 Hz), (*Z*): -120.1 (d, *J* = 37.0 Hz).

HRMS (ASAP) calcd for C<sub>13</sub>H<sub>16</sub>FO<sub>2</sub> [M+H]<sup>+</sup>: 223.1134, Found: 223.1122.

#### (*Z*)-5-Fluoro-5-phenylpent-4-enitrile (**42**)

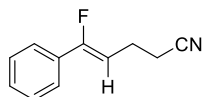

Prepared following the general procedure (**condition A**): 2,6-dichloropyridinium tetrafluoroborate (0.2 mmol, 47 mg, 1.0 equiv), LiBF<sub>4</sub> (0.25 mmol, 4.7 mg, 0.25 equiv), dry CHCl<sub>3</sub> (1.0 mL), 5-phenylpent-4-enitrile (0.2 mmol, 31 mg, 1.0 equiv) at 70 °C. The reaction mixture was quenched after 6 h, and the crude residue was purified by flash column chromatography (hexanes/EtOAc = 10 : 1) to provide the title compound **42**. Pale yellow oil (18 mg, 50% yield, *Z/E* > 50 : 1).

<sup>1</sup>H NMR (400 MHz, CDCl<sub>3</sub>) δ 7.60 – 7.46 (m, 2H), 7.45 – 7.30 (m, 3H), 5.47 (dt, *J* = 35.7, 7.5 Hz, 1H), 2.72 – 2.59 (m, 2H), 2.58 – 2.47 (m, 2H).

<sup>13</sup>C NMR (126 MHz, CDCl<sub>3</sub>) δ 158.8 (d, *J*<sub>C-F</sub> = 250.7 Hz), 131.6 (d, *J*<sub>C-F</sub> = 28.5 Hz), 129.2, 128.5 (d, *J*<sub>C-F</sub> = 1.9 Hz), 124.2 (d, *J*<sub>C-F</sub> = 7.1 Hz), 119.1, 101.3 (d, *J*<sub>C-F</sub> = 16.9 Hz), 20.5 (d, *J*<sub>C-F</sub> = 6.1 Hz), 17.5 (d, *J*<sub>C-F</sub> = 2.2 Hz).

<sup>19</sup>F NMR (376 MHz, CDCl<sub>3</sub>) δ -116.4 (d, *J* = 35.7 Hz).

HRMS (APCI) calcd for C<sub>11</sub>H<sub>11</sub>FN [M+H]<sup>+</sup>: 176.0870, Found: 176.0865.

#### (*Z*)-5-Fluoro-5-phenylpent-4-en-1-yl nicotinate (**43**)

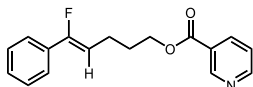

Prepared following the general procedure (**condition A**): 2,6-dichloropyridinium tetrafluoroborate (0.2 mmol, 47 mg, 1.0 equiv), Et<sub>3</sub>O•BF<sub>3</sub> (0.2 mmol, 25 μL, 1.0 equiv), dry CHCl<sub>3</sub> (1.0 mL), 5-phenylpent-4-en-1-yl nicotinate (0.2 mmol, 53 mg, 1.0 equiv) at 70 °C. The reaction mixture was quenched after 6 h, and the crude residue was purified by flash column chromatography (hexanes/EtOAc = 5 : 1) to provide the title compound **43**. Pale yellow oil (19 mg, 33% yield, *Z/E* > 50 : 1).

<sup>1</sup>H NMR (500 MHz, CDCl<sub>3</sub>) δ 9.25 (d, *J* = 1.1 Hz, 1H), 8.77 (dd, *J* = 4.7, 1.3 Hz, 1H), 8.30 (dt, *J* = 7.9, 1.9 Hz, 1H), 7.49 (dd, *J* = 8.1, 1.1 Hz, 2H), 7.40 – 7.29 (m, 4H), 5.44 (dt, *J* = 36.8, 7.7 Hz, 1H), 4.43 (t, *J* = 6.5 Hz, 2H), 2.47 (qd, *J* = 7.6, 1.6 Hz, 2H), 2.02 – 1.92 (m, 2H).

<sup>13</sup>C NMR (126 MHz, CDCl<sub>3</sub>) δ 165.3, 157.5 (d, *J*<sub>C-F</sub> = 247.3 Hz), 153.4, 150.9, 137.0, 132.4 (d, *J*<sub>C-F</sub> = 29.0 Hz), 128.6, 128.4 (d, *J*<sub>C-F</sub> = 1.9 Hz), 126.2, 123.9 (d, *J*<sub>C-F</sub> = 7.0 Hz), 123.2, 104.4 (d, *J*<sub>C-F</sub> = 17.6 Hz), 64.8, 28.4, 20.8 (d, *J*<sub>C-F</sub> = 5.5 Hz).

<sup>19</sup>F NMR (471 MHz, CDCl<sub>3</sub>) δ -119.7 (d, *J* = 36.8 Hz).

HRMS (ESI) calcd for C<sub>17</sub>H<sub>17</sub>FNO<sub>2</sub> [M+H]<sup>+</sup>: 286.1238 Found: 286.1229.

#### (Z)-2-(6-Fluoro-6-phenylhex-5-en-1-yl)isoindoline-1,3-dione (44)

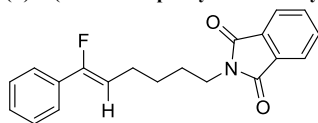

Prepared following the general procedure (**condition A**): 2,6-dichloropyridinium tetrafluoroborate (0.2 mmol, 47 mg, 1.0 equiv), LiBF<sub>4</sub> (0.25 mmol, 4.7 mg, 0.25 equiv), dry CHCl<sub>3</sub> (1.0 mL), 2-(6-phenylhex-5-en-1-yl)isoindoline-1,3-dione (0.2 mmol, 61 mg, 1.0 equiv) at 70 °C. The reaction mixture was quenched after 6 h, and the crude residue was purified by flash column chromatography (hexanes/EtOAc = 10 : 1) to provide the title compound **44**. Yellow solid (47 mg, 72% yield, *Z/E* > 50 : 1).

**Gram scale:** 2,6-dichloropyridinium tetrafluoroborate (16 mmol, 3.76 g, 2.0 equiv), dry CHCl<sub>3</sub> (80 mL), 2-(6-phenylhex-5-en-1-yl)isoindoline-1,3-dione (8.0 mmol, 2.42 g, 1.0 equiv) at 80 °C. The reaction mixture was quenched after 12 h, and the crude residue was purified by flash column chromatography (hexanes/EtOAc = 10 : 1) to provide the title compound **44**. Yellow solid (1.65g, 64% yield, *Z/E* > 20 : 1).

<sup>1</sup>H NMR (500 MHz, CDCl<sub>3</sub>) δ 7.84 (dd, *J* = 5.4, 3.0 Hz, 2H), 7.71 (dd, *J* = 5.4, 3.0 Hz, 2H), 7.54 – 7.41 (m, 2H), 7.39 – 7.26 (m, 3H), 5.37 (dt, *J* = 37.2, 7.6 Hz, 1H), 3.72 (t, *J* = 7.2 Hz, 2H), 2.33 (qd, *J* = 7.5, 1.7 Hz, 2H), 1.81 – 1.66 (m, 2H), 1.56 – 1.46 (m, 2H).

<sup>13</sup>C NMR (126 MHz, CDCl<sub>3</sub>) δ 168.4, 157.0 (d, *J*<sub>C-F</sub> = 246.3 Hz), 133.8, 132.62 (d, *J*<sub>C-F</sub> = 29.2 Hz), 132.2, 128.37 (d, *J*<sub>C-F</sub> = 1.7 Hz), 128.35 (d, *J*<sub>C-F</sub> = 2.0 Hz), 123.9 (d, *J*<sub>C-F</sub> = 6.9 Hz), 123.2, 105.4 (d, *J*<sub>C-F</sub> = 17.7 Hz), 37.8, 28.2, 26.6, 23.7 (d, *J*<sub>C-F</sub> = 5.1 Hz).

<sup>19</sup>F NMR (471 MHz, CDCl<sub>3</sub>) δ -120.6 (d, *J* = 37.2 Hz).

HRMS (ESI) calcd for C<sub>20</sub>H<sub>19</sub>FNO<sub>2</sub> [M+H]<sup>+</sup>: 324.1394, Found: 324.1382.

#### (Z)-1-Chloro-3-(2-cyclopentyl-1-fluorovinyl)benzene (45)

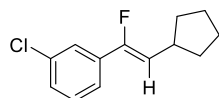

Prepared following the general procedure (**condition A**): 2,6-dichloropyridinium tetrafluoroborate (0.2 mmol, 47 mg, 1.0 equiv), LiBF<sub>4</sub> (0.25 mmol, 4.7 mg, 0.25 equiv), dry CHCl<sub>3</sub> (1.0 mL), 1-chloro-3-(cyclopentylethynyl)benzene (0.2 mmol, 41 mg, 1.0 equiv) at 70 °C. The reaction mixture was quenched after 6 h, and the crude residue was purified by flash column chromatography (hexanes) to provide the title compound **45**. Pale yellow oil (35 mg, 79% yield, *Z/E* > 50 : 1).

<sup>1</sup>H NMR (500 MHz, CDCl<sub>3</sub>) δ 7.47 (s, 1H), 7.38 – 7.34 (m, 1H), 7.29 – 7.22 (m, 2H), 5.37 (dd, *J* = 37.4, 9.3 Hz, 1H), 3.08 – 2.94 (m, 1H), 1.98 – 1.87 (m, 2H), 1.76 – 1.68 (m, 2H), 1.67 – 1.57 (m, 2H), 1.38 – 1.28 (m, 2H).

<sup>13</sup>C NMR (126 MHz, CDCl<sub>3</sub>) δ 154.6 (d, *J*<sub>C-F</sub> = 245.3 Hz), 134.8, 134.5 (d, *J*<sub>C-F</sub> = 2.4 Hz), 129.6 (d, *J*<sub>C-F</sub> = 2.0 Hz), 128.2, 124.0 (d, *J*<sub>C-F</sub> = 7.4 Hz), 121.9 (d, *J*<sub>C-F</sub> = 6.9 Hz), 112.9 (d, *J*<sub>C-F</sub> = 16.8 Hz), 35.5 (d, *J*<sub>C-F</sub> = 3.7 Hz), 33.6 (d, *J*<sub>C-F</sub> = 1.3 Hz), 25.2.

<sup>19</sup>F NMR (471 MHz, CDCl<sub>3</sub>) δ -122.2 (d, *J* = 37.4 Hz).

HRMS (ASAP) calcd for C<sub>13</sub>H<sub>14</sub>ClF [M]<sup>+</sup>: 224.0768, Found: 224.0757.

**(Z)-1-(6-Chloro-1-fluorohex-1-en-1-yl)-2-methoxy-4-nitrobenzene (46)**

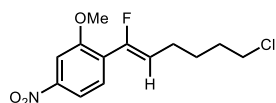

Prepared following the general procedure (**condition D**): 2,6-dichloropyridinium tetrafluoroborate (0.4 mmol, 94 mg, 2.0 equiv), dry DCE (2.0 mL), 1-(6-chlorohex-1-en-1-yl)-2-methoxy-4-nitrobenzene (0.2 mmol, 53 mg, 1.0 equiv) at 70 °C. The reaction mixture was quenched after 12 h, and the crude residue was purified by flash column chromatography (hexanes/EtOAc = 10 : 1) to provide the title compound **46**. Pale yellow oil (28 mg, 49% yield, *Z/E* = 13 : 1)

<sup>1</sup>H NMR (500 MHz, CDCl<sub>3</sub>) δ 7.86 (dd, *J* = 8.6, 2.1 Hz, 1H), 7.80 – 7.76 (m, 1H), 7.65 (d, *J* = 8.6 Hz, 1H), 6.04 (dt, *J* = 39.7, 7.7 Hz, 1H), 4.00 (s, 3H), 3.58 (t, *J* = 6.6 Hz, 2H), 2.38 (qd, *J* = 7.5, 1.7 Hz, 2H), 1.89 – 1.82 (m, 2H), 1.70 – 1.61 (m, 2H).

<sup>13</sup>C NMR (126 MHz, CDCl<sub>3</sub>) δ 156.5 (d, *J*<sub>C-F</sub> = 5.6 Hz), 152.0 (d, *J*<sub>C-F</sub> = 242.9 Hz), 147.8, 127.2 (d, *J*<sub>C-F</sub> = 28.7 Hz), 127.0 (d, *J*<sub>C-F</sub> = 11.2 Hz), 115.7 (d, *J*<sub>C-F</sub> = 1.6 Hz), 115.2 (d, *J*<sub>C-F</sub> = 15.6 Hz), 106.0 (d, *J*<sub>C-F</sub> = 2.5 Hz), 56.1, 44.8, 32.1, 26.4 (d, *J*<sub>C-F</sub> = 1.5 Hz), 23.9 (d, *J*<sub>C-F</sub> = 6.4 Hz).

<sup>19</sup>F NMR (471 MHz, CDCl<sub>3</sub>) δ (*E*): -98.15 (d, *J* = 19.6 Hz), (*Z*): -114.11 (d, *J* = 39.8 Hz).

HRMS (APCI) calcd for C<sub>13</sub>H<sub>15</sub>ClFNO<sub>3</sub> [M]<sup>+</sup>: 287.0719, Found: 287.0715.

**(Z)-1,3-Di-tert-butyl-5-(1-fluoroprop-1-en-1-yl)benzene (47)**

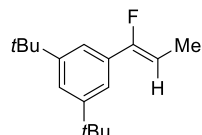

Prepared following the general procedure (**condition A**): 2,6-dichloropyridinium tetrafluoroborate (0.2 mmol, 47 mg, 1.0 equiv), LiBF<sub>4</sub> (0.25 mmol, 4.7 mg, 0.25 equiv), dry CHCl<sub>3</sub> (1.0 mL), 1,3-di-tert-butyl-5-(prop-1-en-1-yl)benzene (0.2 mmol, 46 mg, 1.0 equiv) at 70 °C. The reaction mixture was quenched after 6 h, and the crude residue was purified by flash column chromatography (hexanes) to provide the title compound **47**. Pale yellow oil (26 mg, 52% yield, *Z/E* > 50 : 1).

<sup>1</sup>H NMR (500 MHz, CDCl<sub>3</sub>) δ 7.39 (t, *J* = 1.8 Hz, 1H), 7.34 (d, *J* = 1.7 Hz, 2H), 5.41 (dq, *J* = 37.3, 7.0 Hz, 1H), 1.82 (dd, *J* = 7.0, 2.4 Hz, 3H), 1.34 (s, 18H).

<sup>13</sup>C NMR (126 MHz, CDCl<sub>3</sub>) δ 158.3 (d, *J*<sub>C-F</sub> = 246.1 Hz), 150.8 (d, *J*<sub>C-F</sub> = 1.6 Hz), 132.2 (d, *J*<sub>C-F</sub> = 28.0 Hz), 122.6, 118.2 (d, *J*<sub>C-F</sub> = 6.6 Hz), 100.1 (d, *J*<sub>C-F</sub> = 18.6 Hz), 34.9, 31.4, 9.4 (d, *J*<sub>C-F</sub> = 6.8 Hz).

<sup>19</sup>F NMR (471 MHz, CDCl<sub>3</sub>) δ -120.0 (dd, *J* = 37.3, 2.2 Hz).

HRMS (ASAP) calcd for C<sub>17</sub>H<sub>26</sub>F [M+H]<sup>+</sup>: 249.2019, Found: 249.2025.

**(Z)-1-(1-Fluoroprop-1-en-1-yl)naphthalene (48)**

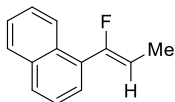

Prepared following the general procedure (**condition A**): 2,6-dichloropyridinium tetrafluoroborate (0.2 mmol, 47 mg, 1.0 equiv),  $\text{LiBF}_4$  (0.25 mmol, 4.7 mg, 0.25 equiv), dry  $\text{CHCl}_3$  (1.0 mL), 1-(prop-1-yn-1-yl)naphthalene (0.2 mmol, 33 mg, 1.0 equiv) at 70 °C. The reaction mixture was quenched after 6 h, and the crude residue was purified by flash column chromatography (hexanes) to provide the title compound **48**. Pale yellow oil (18 mg, 47% yield,  $Z/E > 50 : 1$ ).

$^1\text{H NMR}$  (500 MHz,  $\text{CDCl}_3$ )  $\delta$  8.10 (m, 1H), 7.86 – 7.74 (m, 2H), 7.49 – 7.40 (m, 3H), 7.40 – 7.34 (m, 1H), 5.15 (dq,  $J = 36.0, 7.0$  Hz, 1H), 1.83 (dd,  $J = 7.0, 2.5$  Hz, 3H).

$^{13}\text{C NMR}$  (126 MHz,  $\text{CDCl}_3$ )  $\delta$  158.1 (d,  $J_{\text{C-F}} = 249.7$  Hz), 133.6, 131.5 (d,  $J_{\text{C-F}} = 26.1$  Hz), 131.0, 129.6, 128.3, 127.0 (d,  $J_{\text{C-F}} = 4.5$  Hz), 126.5, 126.0, 125.7 (d,  $J_{\text{C-F}} = 4.3$  Hz), 125.0, 105.6 (d,  $J_{\text{C-F}} = 18.4$  Hz), 9.7 (d,  $J_{\text{C-F}} = 5.4$  Hz).

$^{19}\text{F NMR}$  (471 MHz,  $\text{CDCl}_3$ )  $\delta$  -102.4 (d,  $J = 36.2$  Hz).

**HRMS** (ASAP) calcd for  $\text{C}_{13}\text{H}_{12}\text{F}$   $[\text{M}+\text{H}]^+$ : 187.0923, Found: 187.0934.

**(Z)-(2-Fluoro-2-phenylvinyl)cyclododecane (49)**

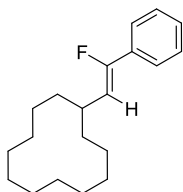

Prepared following the general procedure (**condition A**): 2,6-dichloropyridinium tetrafluoroborate (0.2 mmol, 47 mg, 1.0 equiv),  $\text{LiBF}_4$  (0.25 mmol, 4.7 mg, 0.25 equiv), dry  $\text{CHCl}_3$  (1.0 mL), (phenylethynyl)cyclododecane (0.2 mmol, 54 mg, 1.0 equiv) at 70 °C. The reaction mixture was quenched after 6 h, and the crude residue was purified by flash column chromatography (hexanes) to provide the title compound **49**. Pale yellow oil (36 mg, 62% yield,  $Z/E > 50 : 1$ ).

$^1\text{H NMR}$  (500 MHz,  $\text{CDCl}_3$ )  $\delta$  7.54 – 7.49 (m, 2H), 7.36 (t,  $J = 7.7$  Hz, 2H), 7.33 – 7.28 (m, 1H), 5.26 (dd,  $J = 37.8, 9.8$  Hz, 1H), 2.97 – 2.85 (m, 1H), 1.62 (td,  $J = 13.1, 6.4$  Hz, 2H), 1.54 – 1.49 (m, 2H), 1.47 – 1.25 (m, 18H).

$^{13}\text{C NMR}$  (126 MHz,  $\text{CDCl}_3$ )  $\delta$  155.8 (d,  $J_{\text{C-F}} = 244.6$  Hz), 132.9 (d,  $J_{\text{C-F}} = 29.6$  Hz), 128.3 (d,  $J_{\text{C-F}} = 2.0$  Hz), 128.2, 123.8 (d,  $J_{\text{C-F}} = 7.0$  Hz), 112.0 (d,  $J_{\text{C-F}} = 17.5$  Hz), 30.6 (d,  $J_{\text{C-F}} = 1.0$  Hz), 29.6 (d,  $J_{\text{C-F}} = 3.1$  Hz), 23.9, 23.8, 23.5, 23.3, 22.6.

$^{19}\text{F NMR}$  (471 MHz,  $\text{CDCl}_3$ )  $\delta$  -121.7 (d,  $J = 37.8$  Hz).

**HRMS** (ASAP) calcd for  $\text{C}_{20}\text{H}_{29}\text{F}$   $[\text{M}]^+$ : 288.2253, Found: 288.2251.

**(Z)-6-Fluorododec-6-ene (50)**

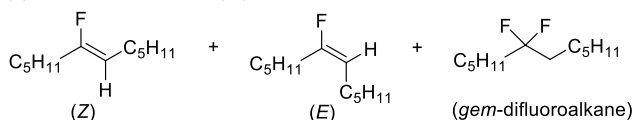



Prepared following the general procedure (**condition A**): 2,6-dichloropyridinium tetrafluoroborate (0.2 mmol, 47 mg, 1.0 equiv), LiBF<sub>4</sub> (0.25 mmol, 4.7 mg, 0.25 equiv), dry CHCl<sub>3</sub> (1.0 mL), dodec-6-yne (0.2 mmol, 33 mg, 1.0 equiv) at 70 °C. The reaction mixture was quenched after 6 h, and the crude residue was purified by flash column chromatography (hexanes) to provide the title compound **50** with spectral properties identical to the reported in the literature<sup>[2]</sup>. Pale yellow oil (26 mg, 70% yield, *Z/E/gem*-difluoroalkane = 4 : 1 : 3).

<sup>1</sup>H NMR (400 MHz, CDCl<sub>3</sub>) δ 4.99 (dt, *J* = 22.4, 7.9 Hz, 0.2H), 4.45 (dt, *J* = 38.3, 7.4 Hz, 0.8H), 2.26 – 2.18 (m, 0.4H), 2.16 – 2.08 (m, 1.6H), 2.07 – 2.00 (m, 1.6H), 1.93 – 1.88 (m, 0.4H), 1.52 – 1.44 (m, 2H), 1.35 – 1.28 (m, 10H), 0.91 – 0.87 (m, 6H).

<sup>19</sup>F NMR (376 MHz, CDCl<sub>3</sub>) δ (*gem*-difluoroalkane): -97.6 (p, *J* = 16.7 Hz), (*E*): -105.3 (qd, *J* = 23.1, 5.7 Hz), (*Z*): -110.1 – -110.4 (m).

#### (*E*)-(2-Chloro-1-fluorovinyl)benzene (**51**)

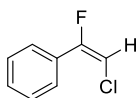

Prepared following the general procedure (**condition C**): 2,6-dichloropyridinium tetrafluoroborate (0.6 mmol, 141 mg, 3.0 equiv), dry CHCl<sub>3</sub> (3.0 mL), (chloroethynyl)benzene (0.2 mmol, 27 mg, 1.0 equiv) at 100 °C. The reaction mixture was quenched after 12 h, and the crude residue was purified by flash column chromatography (hexanes) to provide the title compound **51** with spectral properties identical to the reported in the literature<sup>[3]</sup>. Pale yellow oil (5 mg, 16% yield, *E/Z* > 50 : 1).

<sup>1</sup>H NMR (400 MHz, CDCl<sub>3</sub>) δ 7.85 – 7.78 (m, 2H), 7.45 – 7.40 (m, 3H), 6.26 (d, *J* = 13.4 Hz, 1H).

<sup>19</sup>F NMR (376 MHz, CDCl<sub>3</sub>) δ -110.48 (d, *J* = 13.3 Hz).

#### (*E*)-(2-Bromo-1-fluorovinyl)benzene (**52**)

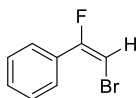

Prepared following the general procedure (**condition C**): 2,6-dichloropyridinium tetrafluoroborate (0.6 mmol, 141 mg, 3.0 equiv), dry CHCl<sub>3</sub> (3.0 mL), (bromoethynyl)benzene (0.2 mmol, 36 mg, 1.0 equiv) at 100 °C. The reaction mixture was quenched after 12 h, and the crude residue was purified by flash column chromatography (hexanes) to provide the title compound **52** with spectral properties identical to the reported in the literature<sup>[4]</sup>. Pale yellow oil (16 mg, 41% yield, *E/Z* > 50 : 1).

<sup>1</sup>H NMR (400 MHz, CDCl<sub>3</sub>) δ 7.87 – 7.78 (m, 2H), 7.45 – 7.41 (m, 3H), 6.24 (d, *J* = 15.8 Hz, 1H).

<sup>19</sup>F NMR (376 MHz, CDCl<sub>3</sub>) δ -96.20 (d, *J* = 15.7 Hz).

#### (*E*)-(1-Fluoro-2-iodovinyl)benzene (**53**)

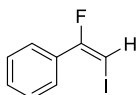

Prepared following the general procedure (**condition C**): 2,6-dichloropyridinium tetrafluoroborate (0.6

mmol, 141 mg, 3.0 equiv), dry  $\text{CHCl}_3$  (3.0 mL), (iodoethynyl)benzene (0.2 mmol, 46 mg, 1.0 equiv) at 100 °C. The reaction mixture was quenched after 12 h, and the crude residue was purified by flash column chromatography (hexanes) to provide the title compound **53** with spectral properties identical to the reported in the literature<sup>[5]</sup>. Pale yellow oil (36 mg, 73% yield,  $E/Z > 50 : 1$ ).

$^1\text{H NMR}$  (400 MHz,  $\text{CDCl}_3$ )  $\delta$  7.84 – 7.77 (m, 2H), 7.46 – 7.39 (m, 3H), 6.14 (d,  $J = 19.5$  Hz, 1H).

$^{13}\text{C NMR}$  (101 MHz,  $\text{CDCl}_3$ )  $\delta$  158.9 (d,  $J_{\text{C-F}} = 256.1$  Hz), 131.1 (d,  $J_{\text{C-F}} = 28.6$  Hz), 130.2 (d,  $J_{\text{C-F}} = 1.2$  Hz), 128.6 (d,  $J_{\text{C-F}} = 5.2$  Hz), 128.2, 53.8 (d,  $J_{\text{C-F}} = 44.7$  Hz).

$^{19}\text{F NMR}$  (376 MHz,  $\text{CDCl}_3$ )  $\delta$  -75.9 (d,  $J = 19.5$  Hz).

#### (*E*)-(3-Fluoro-4-iodobut-3-en-1-yl)benzene (**54**)

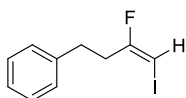

Prepared following the general procedure (**condition C**): 2,6-dichloropyridinium tetrafluoroborate (0.6 mmol, 141 mg, 3.0 equiv), dry  $\text{CHCl}_3$  (3.0 mL), (4-iodobut-3-yn-1-yl)benzene (0.2 mmol, 51 mg, 1.0 equiv) at 100 °C. The reaction mixture was quenched after 12 h, and the crude residue was purified by flash column chromatography (hexanes) to provide the title compound **54** with spectral properties identical to the reported in the literature<sup>[5]</sup>. Pale yellow oil (18 mg, 32% yield,  $E/Z > 50 : 1$ ).

$^1\text{H NMR}$  (500 MHz,  $\text{CDCl}_3$ )  $\delta$  7.34 – 7.28 (m, 2H), 7.25 – 7.20 (m, 3H), 5.71 (d,  $J = 17.6$  Hz, 1H), 2.89 – 2.76 (m, 4H).

$^{19}\text{F NMR}$  (471 MHz,  $\text{CDCl}_3$ )  $\delta$  -82.4 (td,  $J = 21.3, 17.8$  Hz).

#### Ethyl (*E*)-3-fluoro-3-phenylacrylate (**55**)

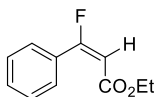

Prepared following the general procedure (**condition C**): 2,6-dichloropyridinium tetrafluoroborate (0.6 mmol, 141 mg, 3.0 equiv), dry  $\text{CHCl}_3$  (3.0 mL), ethyl 3-phenylpropiolate (0.2 mmol, 35 mg, 1.0 equiv) at 100 °C. The reaction mixture was quenched after 12 h, and the crude residue was purified by flash column chromatography (hexanes/ $\text{EtOAc} = 10 : 1$ ) to provide the title compound **55** with spectral properties identical to the reported in the literature<sup>[6]</sup>. Pale yellow oil (14 mg, 36% yield,  $E/Z > 50 : 1$ ).

$^1\text{H NMR}$  (300 MHz,  $\text{CDCl}_3$ )  $\delta$  7.73 – 7.66 (m, 2H), 7.50 – 7.43 (m, 3H), 5.86 (d,  $J = 20.6$  Hz, 1H), 4.13 (q,  $J = 7.1$  Hz, 2H), 1.21 (t,  $J = 7.1$  Hz, 3H).

$^{19}\text{F NMR}$  (282 MHz,  $\text{CDCl}_3$ )  $\delta$  -76.3 (d,  $J = 20.6$  Hz).

#### (5,5-Difluorohexyl)benzene (**56**)

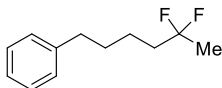

Prepared following the general procedure (**condition C**): 2,6-dichloropyridinium tetrafluoroborate (0.6 mmol, 141 mg, 3.0 equiv), dry  $\text{CHCl}_3$  (3.0 mL), hex-5-yn-1-ylbenzene (0.2 mmol, 32 mg, 1.0 equiv) at

80 °C. The reaction mixture was quenched after 12 h, and the crude residue was purified by flash column chromatography (hexanes) to provide the title compound **56** with spectral properties identical to the reported in the literature<sup>[7]</sup>. Pale yellow oil (20 mg, 51% yield).

<sup>1</sup>H NMR (500 MHz, CDCl<sub>3</sub>) δ 7.31 – 7.26 (m, 2H), 7.22 – 7.16 (m, 3H), 2.64 (t, *J* = 7.5 Hz, 2H), 1.93 – 1.80 (m, 2H), 1.73 – 1.63 (m, 2H), 1.63 – 1.44 (m, 5H).

<sup>13</sup>C NMR (126 MHz, CDCl<sub>3</sub>) δ 142.1, 128.35, 128.32, 125.8, 124.3 (t, *J*<sub>C-F</sub> = 237.6 Hz), 37.8 (t, *J*<sub>C-F</sub> = 25.4 Hz), 35.7, 31.1, 23.2 (t, *J*<sub>C-F</sub> = 28.1 Hz), 22.4 (t, *J*<sub>C-F</sub> = 4.7 Hz).

<sup>19</sup>F NMR (471 MHz, CDCl<sub>3</sub>) δ -90.2 – -90.5 (m, 2F).

#### 2-(5,5-Difluorohexyl)isoindoline-1,3-dione (**57**)

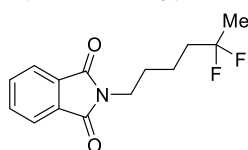

Prepared following the general procedure (**condition C**): 2,6-dichloropyridinium tetrafluoroborate (0.6 mmol, 141 mg, 3.0 equiv), dry CHCl<sub>3</sub> (3.0 mL), 2-(hex-5-yn-1-yl)isoindoline-1,3-dione (0.2 mmol, 45 mg, 1.0 equiv) at 80 °C. The reaction mixture was quenched after 12 h, and the crude residue was purified by flash column chromatography (hexanes/EtOAc = 10 : 1) to provide the title compound **57**. Pale yellow oil (36 mg, 67% yield).

<sup>1</sup>H NMR (500 MHz, CDCl<sub>3</sub>) δ 7.87 – 7.81 (m, 2H), 7.74 – 7.69 (m, 2H), 3.70 (t, *J* = 7.2 Hz, 2H), 1.96 – 1.83 (m, 2H), 1.78 – 1.68 (m, 2H), 1.61 – 1.48 (m, 5H).

<sup>13</sup>C NMR (126 MHz, CDCl<sub>3</sub>) δ 168.4, 133.9, 132.1, 124.0 (t, *J*<sub>C-F</sub> = 237.8 Hz), 123.2, 37.5, 37.4 (t, *J*<sub>C-F</sub> = 25.6 Hz), 28.2, 23.2 (t, *J*<sub>C-F</sub> = 28.0 Hz), 20.0 (t, *J*<sub>C-F</sub> = 4.8 Hz).

<sup>19</sup>F NMR (471 MHz, CDCl<sub>3</sub>) δ -90.6 – -90.9 (m, 2F).

HRMS (ESI) calcd for C<sub>14</sub>H<sub>16</sub>F<sub>2</sub>NO<sub>2</sub> [M+H]<sup>+</sup>: 268.1144, Found: 268.1142.

#### 4,4-Difluoropentyl thiophene-2-carboxylate (**58**)

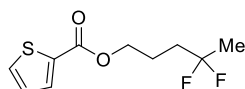

Prepared following the general procedure (**condition C**): 2,6-dichloropyridinium tetrafluoroborate (0.6 mmol, 141 mg, 3.0 equiv), dry CHCl<sub>3</sub> (3.0 mL), pent-4-yn-1-yl thiophene-2-carboxylate (0.2 mmol, 39 mg, 1.0 equiv) at 80 °C. The reaction mixture was quenched after 12 h, and the crude residue was purified by flash column chromatography (hexanes/EtOAc = 10 : 1) to provide the title compound **58** with spectral properties identical to the reported in the literature<sup>[7]</sup>. Pale yellow oil (29 mg, 62% yield).

<sup>1</sup>H NMR (500 MHz, CDCl<sub>3</sub>) δ 7.81 (dd, *J* = 3.7, 1.2 Hz, 1H), 7.56 (dd, *J* = 5.0, 1.1 Hz, 1H), 7.11 (dd, *J* = 4.9, 3.8 Hz, 1H), 4.34 (t, *J* = 6.0 Hz, 2H), 2.05 – 1.92 (m, 4H), 1.63 (t, *J* = 18.4 Hz, 3H).

<sup>13</sup>C NMR (126 MHz, CDCl<sub>3</sub>) δ 162.1, 133.7, 133.5, 132.4, 127.8, 123.8 (t, *J*<sub>C-F</sub> = 238.0 Hz), 64.3, 34.6 (t, *J*<sub>C-F</sub> = 26.1 Hz), 23.4 (t, *J*<sub>C-F</sub> = 27.9 Hz), 22.2 (t, *J*<sub>C-F</sub> = 4.7 Hz).

<sup>19</sup>F NMR (471 MHz, CDCl<sub>3</sub>) δ -91.2 – -91.4 (m, 2F).

#### 1-(1-(4,4-Difluoropentyl)-1H-indol-3-yl)ethan-1-one (**59**)

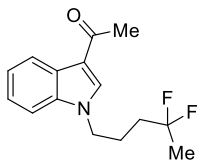

Prepared following the general procedure (**condition C**): 2,6-dichloropyridinium tetrafluoroborate (0.6 mmol, 141 mg, 3.0 equiv), dry  $\text{CHCl}_3$  (3.0 mL), 1-(1-(pent-4-yn-1-yl)-1H-indol-3-yl)ethan-1-one (0.2 mmol, 45 mg, 1.0 equiv) at 80 °C. The reaction mixture was quenched after 12 h, and the crude residue was purified by flash column chromatography (hexanes/EtOAc = 10 : 1) to provide the title compound **59** with spectral properties identical to the reported in the literature<sup>[7]</sup>. Pale yellow oil (39 mg, 73% yield).

**<sup>1</sup>H NMR** (500 MHz,  $\text{CDCl}_3$ )  $\delta$  8.45 – 8.33 (m, 1H), 7.73 (s, 1H), 7.39 – 7.26 (m, 3H), 4.23 (t,  $J = 7.1$  Hz, 2H), 2.53 (s, 3H), 2.18 – 2.06 (m, 2H), 1.94 – 1.79 (m, 2H), 1.59 (t,  $J = 18.4$  Hz, 3H).

**<sup>13</sup>C NMR** (126 MHz,  $\text{CDCl}_3$ )  $\delta$  192.9, 136.6, 134.44, 126.4, 123.6 (t,  $J_{\text{C-F}} = 238.4$  Hz), 123.4, 122.7, 122.6, 117.3, 109.6, 46.3, 34.8 (t,  $J_{\text{C-F}} = 25.9$  Hz), 27.6, 23.6 (t,  $J_{\text{C-F}} = 27.8$  Hz), 23.1 (t,  $J_{\text{C-F}} = 4.1$  Hz).

**<sup>19</sup>F NMR** (471 MHz,  $\text{CDCl}_3$ )  $\delta$  -91.2 – -91.4 (m, 2F).

#### (4,4-Difluoropentyloxy)carbonyl ferrocene (**60**)

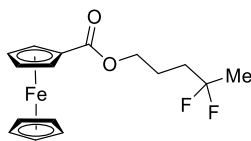

Prepared following the general procedure (**condition C**): 2,6-dichloropyridinium tetrafluoroborate (0.6 mmol, 141 mg, 3.0 equiv), dry  $\text{CHCl}_3$  (3.0 mL), (pent-4-yn-1-yloxy)carbonyl ferrocene (0.2 mmol, 59 mg, 1.0 equiv) at 80 °C. The reaction mixture was quenched after 12 h, and the crude residue was purified by flash column chromatography (hexanes/EtOAc = 10 : 1) to provide the title compound **60**. Pale yellow oil (32 mg, 48% yield).

**<sup>1</sup>H NMR** (500 MHz,  $\text{CDCl}_3$ )  $\delta$  4.81 (s, 2H), 4.40 (s, 2H), 4.26 (t,  $J = 6.2$  Hz, 2H), 4.20 (s, 5H), 2.08 – 1.97 (m, 2H), 1.97 – 1.90 (m, 2H), 1.65 (t,  $J = 18.3$  Hz, 3H).

**<sup>13</sup>C NMR** (126 MHz,  $\text{CDCl}_3$ )  $\delta$  171.6, 123.9 (t,  $J_{\text{C-F}} = 237.9$  Hz), 71.3, 71.1, 70.1, 69.7, 63.3, 34.7 (t,  $J_{\text{C-F}} = 26.0$  Hz), 23.5 (t,  $J_{\text{C-F}} = 28.0$  Hz), 22.4 (t,  $J_{\text{C-F}} = 4.7$  Hz).

**<sup>19</sup>F NMR** (471 MHz,  $\text{CDCl}_3$ )  $\delta$  -91.0 – -91.3 (m, 2F).

**HRMS** (APCI) calcd for  $\text{C}_{16}\text{H}_{19}\text{F}_2\text{FeO}_2$   $[\text{M}+\text{H}]^+$ : 337.0697, Found: 337.0681.

#### (1-Fluorovinyl)benzene (**61**)

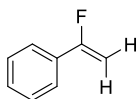

Prepared following the general procedure (**condition A**): 2,6-dichloropyridinium tetrafluoroborate (0.2 mmol, 47 mg, 1.0 equiv),  $\text{LiBF}_4$  (0.25 mmol, 4.7 mg, 0.25 equiv), dry  $\text{CHCl}_3$  (1.0 mL), phenylacetylene (0.2 mmol, 21 mg, 1.0 equiv) at 70 °C. The reaction mixture was quenched after 6 h,

and the crude residue was purified by flash column chromatography (hexanes) to provide the title compound **61** with spectral properties identical to the reported in the literature<sup>[12]</sup>. Pale yellow oil (9 mg, 35% yield).

<sup>1</sup>H NMR (300 MHz, CDCl<sub>3</sub>) δ 7.60 – 7.52 (m, 2H), 7.40 – 7.31 (m, 3H), 5.03 (dd, *J* = 49.8, 3.5 Hz, 1H), 4.84 (dd, *J* = 17.9, 3.5 Hz, 1H).

<sup>19</sup>F NMR (282 MHz, CDCl<sub>3</sub>) δ -107.9 (dd, *J* = 49.7, 17.9 Hz).

#### 1-(1-Fluorovinyl)-4-methylbenzene (**62**)

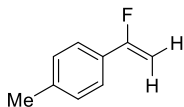

Prepared following the general procedure (**condition A**): 2,6-dichloropyridinium tetrafluoroborate (0.2 mmol, 47 mg, 1.0 equiv), LiBF<sub>4</sub> (0.25 mmol, 4.7 mg, 0.25 equiv), dry CHCl<sub>3</sub> (1.0 mL), 4-ethynyltoluene (0.2 mmol, 23 mg, 1.0 equiv) at 40 °C. The reaction mixture was quenched after 1 h, and the crude residue was purified by flash column chromatography (hexanes) to provide the title compound **62** with spectral properties identical to the reported in the literature<sup>[8]</sup>. Pale yellow oil (7 mg, 27% yield).

<sup>1</sup>H NMR (400 MHz, CDCl<sub>3</sub>) δ 7.43 (d, *J* = 8.1 Hz, 2H), 7.16 (d, *J* = 8.0 Hz, 2H), 4.96 (dd, *J* = 50.0, 3.4 Hz, 1H), 4.77 (dd, *J* = 18.0, 3.4 Hz, 1H), 2.35 (s, 3H).

<sup>19</sup>F NMR (376 MHz, CDCl<sub>3</sub>) δ -107.7 (dd, *J* = 50.1, 18.0 Hz).

#### 1-Fluoro-2-(1-fluorovinyl)benzene (**63**)

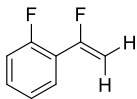

Prepared following the general procedure (**condition A**): 2,6-dichloropyridinium tetrafluoroborate (0.2 mmol, 47 mg, 1.0 equiv), LiBF<sub>4</sub> (0.25 mmol, 4.7 mg, 0.25 equiv), dry CHCl<sub>3</sub> (1.0 mL), 2-fluorophenylacetylene (0.2 mmol, 24 mg, 1.0 equiv) at 70 °C. The reaction mixture was quenched after 6 h, and the crude residue was purified by flash column chromatography (hexanes) to provide the title compound **63** with spectral properties identical to the reported in the literature<sup>[9]</sup>. Pale yellow oil (15 mg, 52% yield).

<sup>1</sup>H NMR (500 MHz, CDCl<sub>3</sub>) δ 7.57 (td, *J* = 7.8, 1.5 Hz, 1H), 7.38 – 7.29 (m, 1H), 7.18 (t, *J* = 7.6 Hz, 1H), 7.11 (dd, *J* = 11.5, 8.3 Hz, 1H), 5.26 (dd, *J* = 52.1, 3.3 Hz, 1H), 5.11 (dt, *J* = 19.9, 3.0 Hz, 1H).

<sup>13</sup>C NMR (126 MHz, CDCl<sub>3</sub>) δ 159.8 (dd, *J*<sub>C-F</sub> = 252.9, 5.9 Hz), 157.3 (dd, *J*<sub>C-F</sub> = 247.1, 4.6 Hz), 130.6 (d, *J*<sub>C-F</sub> = 8.7 Hz), 127.2 (dd, *J*<sub>C-F</sub> = 8.4, 2.0 Hz), 124.1 (dd, *J*<sub>C-F</sub> = 3.7, 1.1 Hz), 120.1 (dd, *J*<sub>C-F</sub> = 31.2, 11.0 Hz), 116.1 (dd, *J*<sub>C-F</sub> = 22.5, 2.8 Hz), 95.6 (dd, *J*<sub>C-F</sub> = 21.0, 13.0 Hz).

<sup>19</sup>F NMR (471 MHz, CDCl<sub>3</sub>) δ -103.6 (ddd, *J* = 52.3, 19.9, 6.7 Hz, 1F), -112.0 – -112.1 (m, 1F).

#### 1-Chloro-2-(1-fluorovinyl)benzene (**64**)

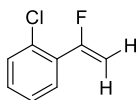

Prepared following the general procedure (**condition A**): 2,6-dichloropyridinium tetrafluoroborate (0.2 mmol, 47 mg, 1.0 equiv),  $\text{LiBF}_4$  (0.25 mmol, 4.7 mg, 0.25 equiv), dry  $\text{CHCl}_3$  (1.0 mL), 2-chlorophenylacetylene (0.2 mmol, 27 mg, 1.0 equiv) at 70 °C. The reaction mixture was quenched after 6 h, and the crude residue was purified by flash column chromatography (hexanes) to provide the title compound **64** with spectral properties identical to the reported in the literature<sup>[10]</sup>. Pale yellow oil (18 mg, 58% yield).

**$^1\text{H}$  NMR** (500 MHz,  $\text{CDCl}_3$ )  $\delta$  7.52 (dd,  $J = 7.1, 2.4$  Hz, 1H), 7.43 (dd,  $J = 7.0, 1.5$  Hz, 1H), 7.34 – 7.27 (m, 2H), 5.14 (q, 3.3 Hz, 1H), 5.07 (dd,  $J = 37.6, 3.3$  Hz, 1H).

**$^{13}\text{C}$  NMR** (126 MHz,  $\text{CDCl}_3$ )  $\delta$  160.5 (d,  $J = 252.0$  Hz), 132.2 (d,  $J = 2.1$  Hz), 131.4 (d,  $J = 28.3$  Hz), 130.5, 130.4 (d,  $J = 0.7$  Hz), 129.8 (d,  $J = 5.6$  Hz), 126.7, 95.9 (d,  $J = 21.8$  Hz).

**$^{19}\text{F}$  NMR** (471 MHz,  $\text{CDCl}_3$ )  $\delta$  -93.6 (dd,  $J = 49.1, 17.9$  Hz).

#### 1-Bromo-2-(1-fluorovinyl)benzene (**65**)

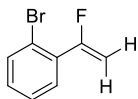

Prepared following the general procedure (**condition A**): 2,6-dichloropyridinium tetrafluoroborate (0.2 mmol, 47 mg, 1.0 equiv),  $\text{LiBF}_4$  (0.25 mmol, 4.7 mg, 0.25 equiv), dry  $\text{CHCl}_3$  (1.0 mL), 1-bromo-2-ethynylbenzene (0.2 mmol, 36 mg, 1.0 equiv) at 70 °C. The reaction mixture was quenched after 6 h, and the crude residue was purified by flash column chromatography (hexanes) to provide the title compound **65** with spectral properties identical to the reported in the literature<sup>[11]</sup>. Pale yellow oil (22 mg, 54% yield).

**$^1\text{H}$  NMR** (500 MHz,  $\text{CDCl}_3$ )  $\delta$  7.63 (d,  $J = 8.0$  Hz, 1H), 7.48 (dd,  $J = 7.7, 1.4$  Hz, 1H), 7.33 (tt,  $J = 7.7, 1.0$  Hz, 1H), 7.26 – 7.21 (m, 1H), 5.09 (dd,  $J = 16.4, 3.3$  Hz, 1H), 4.97 (dd,  $J = 48.4, 3.3$  Hz, 1H).

**$^{13}\text{C}$  NMR** (126 MHz,  $\text{CDCl}_3$ )  $\delta$  161.8 (d,  $J_{\text{C-F}} = 253.6$  Hz), 133.7 (d,  $J_{\text{C-F}} = 29$  Hz, partially superimposed with resonance at 133.6), 133.6, 130.7 (d,  $J_{\text{C-F}} = 1.1$  Hz), 130.5 (d,  $J_{\text{C-F}} = 4.4$  Hz), 127.2, 121.5, 95.6 (d,  $J_{\text{C-F}} = 21.6$  Hz).

**$^{19}\text{F}$  NMR** (471 MHz,  $\text{CDCl}_3$ )  $\delta$  -91.48 (dd,  $J = 48.4, 16.4$  Hz).

**$^{13}\text{C}$  NMR** (126 MHz,  $\text{CDCl}_3$ )  $\delta$  133.74.

#### 1-Fluoro-4-(1-fluorovinyl)benzene (**66**)

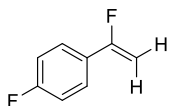

Prepared following the general procedure (**condition A**): 2,6-dichloropyridinium tetrafluoroborate (0.2 mmol, 47 mg, 1.0 equiv),  $\text{LiBF}_4$  (0.25 mmol, 4.7 mg, 0.25 equiv), dry  $\text{CHCl}_3$  (1.0 mL), 4-fluorophenylacetylene (0.2 mmol, 24 mg, 1.0 equiv) at 70 °C. The reaction mixture was quenched after 6 h, and the crude residue was purified by flash column chromatography (hexanes) to provide the

title compound **66** with spectral properties identical to the reported in the literature<sup>[8]</sup>. Pale yellow oil (12 mg, 42% yield).

<sup>1</sup>H NMR (400 MHz, CDCl<sub>3</sub>) δ 7.53 (dd, *J* = 8.8, 5.2 Hz, 2H), 7.06 (t, *J* = 8.8 Hz, 2H), 4.96 (dd, *J* = 49.7, 3.6 Hz, 1H), 4.83 (dd, *J* = 17.9, 3.6 Hz, 1H).

<sup>19</sup>F NMR (376 MHz, CDCl<sub>3</sub>) δ -107.0 (dd, *J* = 49.7, 17.9 Hz, 1F), -111.5 – -111.6 (m, 1F).

#### 1-Chloro-4-(1-fluorovinyl)benzene (**67**)

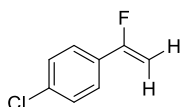

Prepared following the general procedure (**condition A**): 2,6-dichloropyridinium tetrafluoroborate (0.2 mmol, 47 mg, 1.0 equiv), LiBF<sub>4</sub> (0.25 mmol, 4.7 mg, 0.25 equiv), dry CHCl<sub>3</sub> (1.0 mL), 4-chlorophenylacetylene (0.2 mmol, 28 mg, 1.0 equiv) at 70 °C. The reaction mixture was quenched after 6 h, and the crude residue was purified by flash column chromatography (hexanes) to provide the title compound **67** with spectral properties identical to the reported in the literature<sup>[8]</sup>. Pale yellow oil (17 mg, 55% yield).

<sup>1</sup>H NMR (500 MHz, CDCl<sub>3</sub>) δ 7.48 (d, *J* = 8.6 Hz, 2H), 7.35 (d, *J* = 8.3 Hz, 2H), 5.02 (dd, *J* = 49.4, 3.7 Hz, 1H), 4.87 (dd, *J* = 17.7, 3.6 Hz, 1H).

<sup>13</sup>C NMR (126 MHz, CDCl<sub>3</sub>) δ 162.0 (d, *J*<sub>C-F</sub> = 249.9 Hz), 135.3, 130.5 (d, *J*<sub>C-F</sub> = 29.9 Hz), 128.7 (d, *J*<sub>C-F</sub> = 2.0 Hz), 125.9 (d, *J*<sub>C-F</sub> = 6.9 Hz), 90.1 (d, *J*<sub>C-F</sub> = 22.4 Hz).

<sup>19</sup>F NMR (471 MHz, CDCl<sub>3</sub>) δ -107.9 (dd, *J* = 49.4, 17.7 Hz).

#### 1-Bromo-4-(1-fluorovinyl)benzene (**68**)

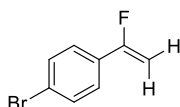

Prepared following the general procedure (**condition A**): 2,6-dichloropyridinium tetrafluoroborate (0.2 mmol, 47 mg, 1.0 equiv), LiBF<sub>4</sub> (0.25 mmol, 4.7 mg, 0.25 equiv), dry CHCl<sub>3</sub> (1.0 mL), 4-bromophenylacetylene (0.2 mmol, 36 mg, 1.0 equiv) at 70 °C. The reaction mixture was quenched after 6 h, and the crude residue was purified by flash column chromatography (hexanes) to provide the title compound **68** with spectral properties identical to the reported in the literature<sup>[12]</sup>. Pale yellow oil (24 mg, 59% yield).

<sup>1</sup>H NMR (500 MHz, CDCl<sub>3</sub>) δ 7.51 (t, *J* = 5.7 Hz, 2H), 7.44 – 7.39 (m, 2H), 5.04 (dd, *J* = 49.4, 3.7 Hz, 1H), 4.88 (dd, *J* = 17.7, 3.7 Hz, 1H).

<sup>13</sup>C NMR (126 MHz, CDCl<sub>3</sub>) δ 162.0 (d, *J*<sub>C-F</sub> = 250.2 Hz), 131.7 (d, *J*<sub>C-F</sub> = 1.9 Hz), 130.9 (d, *J*<sub>C-F</sub> = 29.8 Hz), 126.2 (d, *J*<sub>C-F</sub> = 6.9 Hz), 123.6, 90.2 (d, *J*<sub>C-F</sub> = 22.4 Hz).

<sup>19</sup>F NMR (471 MHz, CDCl<sub>3</sub>) δ -108.0 (dd, *J* = 49.4, 17.7 Hz).

#### 1-(1-Fluorovinyl)-4-(trifluoromethyl)benzene (**69**)

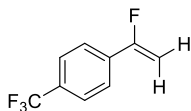

Prepared following the general procedure (**condition A**): 2,6-dichloropyridinium tetrafluoroborate (0.2 mmol, 47 mg, 1.0 equiv), LiBF<sub>4</sub> (0.25 mmol, 4.7 mg, 0.25 equiv), dry CHCl<sub>3</sub> (1.0 mL), 1-ethynyl-4-(trifluoromethyl)benzene (0.2 mmol, 34 mg, 1.0 equiv) at 70 °C. The reaction mixture was quenched after 6 h, and the crude residue was purified by flash column chromatography (hexanes) to provide the title compound **69** with spectral properties identical to the reported in the literature<sup>[13]</sup>. Pale yellow oil (14 mg, 38% yield).

<sup>1</sup>H NMR (400 MHz, CDCl<sub>3</sub>) δ 7.71 – 7.60 (m, 4H), 5.15 (dd, *J* = 49.1, 3.8 Hz, 1H), 4.98 (dd, *J* = 17.5, 3.8 Hz, 1H).

<sup>19</sup>F NMR (376 MHz, CDCl<sub>3</sub>) δ -63.2 (s, 3F), -108.4 (dd, *J* = 49.1, 17.6 Hz, 1F).

#### Methyl 4-(1-fluorovinyl)benzoate (**70**)

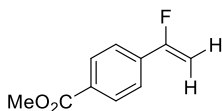

Prepared following the general procedure (**condition A**): 2,6-dichloropyridinium tetrafluoroborate (0.2 mmol, 47 mg, 1.0 equiv), LiBF<sub>4</sub> (0.25 mmol, 4.7 mg, 0.25 equiv), dry CHCl<sub>3</sub> (1.0 mL), methyl 4-ethynylbenzoate (0.2 mmol, 32 mg, 1.0 equiv) at 70 °C. The reaction mixture was quenched after 6 h, and the crude residue was purified by flash column chromatography (hexanes/EtOAc = 10 : 1) to provide the title compound **70** with spectral properties identical to the reported in the literature<sup>[14]</sup>. Pale yellow oil (12 mg, 34% yield).

<sup>1</sup>H NMR (300 MHz, CDCl<sub>3</sub>) δ 8.04 (d, *J* = 8.7 Hz, 2H), 7.61 (d, *J* = 8.5 Hz, 2H), 5.16 (dd, *J* = 49.1, 3.7 Hz, 1H), 4.97 (dd, *J* = 17.6, 3.7 Hz, 1H), 3.93 (s, 3H).

<sup>19</sup>F NMR (282 MHz, CDCl<sub>3</sub>) δ -108.3 (dd, *J* = 49.1, 17.6 Hz).

#### (*Z*)-(1-Fluoroethene-1,2-diyl)dibenzene (**71**)

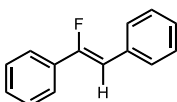

Prepared following the general procedure (**condition D**): 2,6-dichloropyridinium tetrafluoroborate (0.4 mmol, 94 mg, 2.0 equiv) dry DCE (2.0 mL), 1,2-diphenylethyne (0.2 mmol, 36 mg, 1.0 equiv) at 100 °C. The reaction mixture was quenched after 6 h, and the crude residue was purified by flash column chromatography (hexanes) to provide the title compound **71** with spectral properties identical to the reported in the literature<sup>[2]</sup>. Pale yellow oil (23 mg, 59% yield, *Z/E* > 50 : 1).

<sup>1</sup>H NMR (500 MHz, CDCl<sub>3</sub>) δ 7.73 – 7.58 (m, 4H), 7.50 – 7.32 (m, 5H), 7.28 (t, *J* = 7.4 Hz, 1H), 6.33 (d, *J* = 39.5 Hz, 1H).

<sup>13</sup>C NMR (126 MHz, CDCl<sub>3</sub>) δ 157.2 (d, *J*<sub>C-F</sub> = 258.6 Hz), 133.7 (d, *J*<sub>C-F</sub> = 3.0 Hz), 132.9 (d, *J*<sub>C-F</sub> = 27.9 Hz), 129.0 (d, *J*<sub>C-F</sub> = 2.3 Hz), 128.9, 128.6, 128.6, 127.3 (d, *J*<sub>C-F</sub> = 2.5 Hz), 124.3 (d, *J*<sub>C-F</sub> = 7.4 Hz), 105.8 (d, *J*<sub>C-F</sub> = 10.5 Hz).



$^{19}\text{F}$  NMR (471 MHz,  $\text{CDCl}_3$ )  $\delta$  -114.2 (d,  $J$  = 39.6 Hz).

**(Z)-4,4'-(1-Fluoroethene-1,2-diyl)bis(chlorobenzene) (72)**

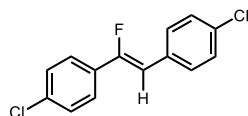

Prepared following the general procedure (**condition D**): 2,6-dichloropyridinium tetrafluoroborate (0.4 mmol, 94 mg, 2.0 equiv) dry DCE (2.0 mL), 1,2-bis(4-chlorophenyl)ethyne (0.2 mmol, 49 mg, 1.0 equiv) at 100 °C. The reaction mixture was quenched after 12 h, and the crude residue was purified by flash column chromatography (hexanes) to provide the title compound **72** with spectral properties identical to the reported in the literature<sup>[2]</sup>. Pale yellow oil (34 mg, 64% yield,  $Z/E > 50 : 1$ ).

$^1\text{H}$  NMR (500 MHz,  $\text{CDCl}_3$ )  $\delta$  7.55 (dd,  $J$  = 8.6, 2.7 Hz, 4H), 7.38 (d,  $J$  = 8.5 Hz, 2H), 7.34 (d,  $J$  = 8.5 Hz, 2H), 6.24 (d,  $J$  = 38.9 Hz, 1H).

$^{13}\text{C}$  NMR (126 MHz,  $\text{CDCl}_3$ )  $\delta$  156.6 (d,  $J_{\text{C-F}}$  = 258.8 Hz), 135.2, 133.2 (d,  $J_{\text{C-F}}$  = 3.6 Hz), 131.8 (d,  $J_{\text{C-F}}$  = 3.1 Hz), 131.0 (d,  $J_{\text{C-F}}$  = 28.4 Hz), 130.1 (d,  $J_{\text{C-F}}$  = 8.3 Hz), 128.9 (d,  $J_{\text{C-F}}$  = 2.0 Hz), 128.8, 125.6 (d,  $J_{\text{C-F}}$  = 7.4 Hz), 105.2 (d,  $J_{\text{C-F}}$  = 10.4 Hz).

$^{19}\text{F}$  NMR (471 MHz,  $\text{CDCl}_3$ )  $\delta$  -113.7 (d,  $J$  = 38.9 Hz).

**(Z)-4,4'-(1-Fluoroethene-1,2-diyl)bis(bromobenzene) (73)**

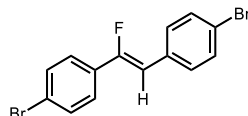

Prepared following the general procedure (**condition D**): 2,6-dichloropyridinium tetrafluoroborate (0.4 mmol, 94 mg, 2.0 equiv) dry DCE (2.0 mL), 1,2-bis(4-bromophenyl)ethyne (0.2 mmol, 67 mg, 1.0 equiv) at 100 °C. The reaction mixture was quenched after 12 h, and the crude residue was purified by flash column chromatography (hexanes) to provide the title compound **73**. Pale yellow oil (48 mg, 68% yield,  $Z/E > 50 : 1$ ).

$^1\text{H}$  NMR (500 MHz,  $\text{CDCl}_3$ )  $\delta$  7.59 – 7.52 (m, 2H), 7.51 – 7.41 (m, 6H), 6.24 (d,  $J$  = 38.8 Hz, 1H).

$^{13}\text{C}$  NMR (126 MHz,  $\text{CDCl}_3$ )  $\delta$  156.7 (d,  $J_{\text{C-F}}$  = 259.0 Hz), 132.2 (d,  $J_{\text{C-F}}$  = 3.0 Hz), 131.9 (d,  $J_{\text{C-F}}$  = 2.0 Hz), 131.8, 131.4 (d,  $J_{\text{C-F}}$  = 28.4 Hz), 130.4 (d,  $J_{\text{C-F}}$  = 8.3 Hz), 125.8 (d,  $J_{\text{C-F}}$  = 7.4 Hz), 123.42, 121.4 (d,  $J_{\text{C-F}}$  = 3.7 Hz), 105.4 (d,  $J_{\text{C-F}}$  = 10.3 Hz).

$^{19}\text{F}$  NMR (471 MHz,  $\text{CDCl}_3$ )  $\delta$  -113.5 (d,  $J$  = 38.8 Hz).

HRMS (ESI) calcd for  $\text{C}_{14}\text{H}_9\text{Br}_2\text{F}$   $[\text{M}]^+$ : 353.9050, Found: 353.9046.

**(Z)-4,4'-(1-Fluoroethene-1,2-diyl)bis(methylbenzene) (74)**

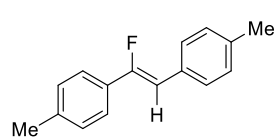

Prepared following the general procedure (**condition D**): 2,6-dichloropyridinium tetrafluoroborate (0.4 mmol, 94 mg, 2.0 equiv) dry  $\text{CHCl}_3$  (2.0 mL), 1,2-di-p-tolyne (0.2 mmol, 41 mg, 1.0 equiv) at 90

°C. The reaction mixture was quenched after 6 h, and the crude residue was purified by flash column chromatography (hexanes) to provide the title compound **74** with spectral properties identical to the reported in the literature<sup>[15]</sup>. Pale yellow oil (21 mg, 47% yield, *Z/E* > 50 : 1).

**<sup>1</sup>H NMR** (500 MHz, CDCl<sub>3</sub>) δ 7.53 (d, *J* = 8.1 Hz, 4H), 7.20 (dd, *J* = 14.3, 8.0 Hz, 4H), 6.24 (d, *J* = 39.9 Hz, 1H), 2.39 (s, 3H), 2.37 (s, 3H).

**<sup>13</sup>C NMR** (126 MHz, CDCl<sub>3</sub>) δ 156.9 (d, *J*<sub>C-F</sub> = 257.1 Hz), 138.9, 137.0 (d, *J*<sub>C-F</sub> = 2.5 Hz), 131.0 (d, *J*<sub>C-F</sub> = 2.9 Hz), 130.3 (d, *J*<sub>C-F</sub> = 28.1 Hz), 129.3, 128.7 (d, *J*<sub>C-F</sub> = 7.9 Hz), 124.1 (d, *J*<sub>C-F</sub> = 7.4 Hz), 104.9 (d, *J*<sub>C-F</sub> = 10.8 Hz), 21.28, 21.26.

**<sup>19</sup>F NMR** (471 MHz, CDCl<sub>3</sub>) δ -114.9 (d, *J* = 39.9 Hz).

#### (*Z*)-1-(2-Fluoro-2-phenylvinyl)-4-(trifluoromethyl)benzene (**75**)

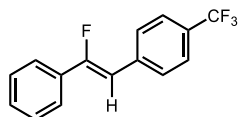

Prepared following the general procedure (**condition D**): 2,6-dichloropyridinium tetrafluoroborate (0.4 mmol, 94 mg, 2.0 equiv) dry DCE (2.0 mL), 1-(phenylethynyl)-4-(trifluoromethyl)benzene (0.2 mmol, 49 mg, 1.0 equiv) at 100 °C. The reaction mixture was quenched after 12 h, and the crude residue was purified by flash column chromatography (hexanes) to provide the title compound **75** with spectral properties identical to the reported in the literature<sup>[1]</sup>. Pale yellow oil (29 mg, 55% yield, r.r. > 50 : 1, *Z/E* > 50 : 1).

**<sup>1</sup>H NMR** (500 MHz, CDCl<sub>3</sub>) δ 7.74 (d, *J* = 8.2 Hz, 2H), 7.68 (d, *J* = 6.9 Hz, 2H), 7.63 (d, *J* = 8.1 Hz, 2H), 7.48 – 7.37 (m, 3H), 6.35 (d, *J* = 38.7 Hz, 1H).

**<sup>13</sup>C NMR** (126 MHz, CDCl<sub>3</sub>) δ 158.7 (d, *J*<sub>C-F</sub> = 261.6 Hz), 137.2, 132.2 (d, *J*<sub>C-F</sub> = 27.6 Hz), 131.8 (d, *J*<sub>C-F</sub> = 6.9 Hz), 129.6, 129.0 (d, *J*<sub>C-F</sub> = 8.3 Hz), 128.7 (d, *J*<sub>C-F</sub> = 2.0 Hz), 125.4 (q, *J*<sub>C-F</sub> = 3.7 Hz), 124.6 (d, *J*<sub>C-F</sub> = 7.6 Hz), 124.2 (q, *J*<sub>C-F</sub> = 271.7 Hz), 104.6 (d, *J*<sub>C-F</sub> = 10.2 Hz).

**<sup>19</sup>F NMR** (471 MHz, CDCl<sub>3</sub>) δ -62.6 (s, 3F), -111.0 (d, *J* = 38.6 Hz, 1F).

#### Methyl (*Z*)-4-(2-fluoro-2-phenylvinyl)benzoate (**76**)

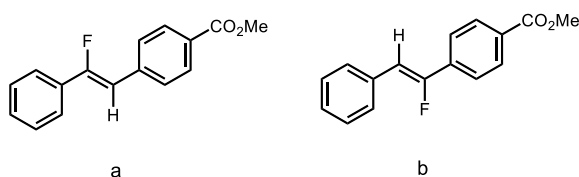

a : b = 17 : 1

Prepared following the general procedure (**condition D**): 2,6-dichloropyridinium tetrafluoroborate (0.4 mmol, 94 mg, 2.0 equiv) dry DCE (2.0 mL), methyl 4-(phenylethynyl)benzoate (0.2 mmol, 47 mg, 1.0 equiv) at 100 °C. The reaction mixture was quenched after 12 h, and the crude residue was purified by flash column chromatography (hexanes/EtOAc = 10 : 1) to provide the title compound **76** with spectral properties identical to the reported in the literature<sup>[16]</sup>. Pale yellow oil (22 mg, 43% yield, r.r. = 17 : 1, *Z/E* > 50 : 1).

**<sup>1</sup>H NMR** (500 MHz, CDCl<sub>3</sub>) δ 8.04 (d, *J* = 8.4 Hz, 2H), 7.73 – 7.63 (m, 4H), 7.46 – 7.36 (m, 3H), 6.35 (d, *J* = 38.9 Hz, 1H), 3.93 (s, 3H).

<sup>13</sup>C NMR (126 MHz, CDCl<sub>3</sub>) δ 166.8, 158.7 (d, *J*<sub>C-F</sub> = 262.1 Hz), 138.2 (d, *J*<sub>C-F</sub> = 3.1 Hz), 132.3 (d, *J*<sub>C-F</sub> = 27.6 Hz), 129.8, 129.6, 128.73, 128.68, 128.67, 124.5 (d, *J*<sub>C-F</sub> = 7.6 Hz), 105.1 (d, *J*<sub>C-F</sub> = 10.1 Hz), 52.0.

<sup>19</sup>F NMR (471 MHz, CDCl<sub>3</sub>) δ (a): -110.5 (d, *J* = 38.9 Hz), (b): -115.1 (d, *J* = 39.2 Hz).

**(Z)-1-(4-(2-Fluoro-2-phenylvinyl)phenyl)ethan-1-one (77)**

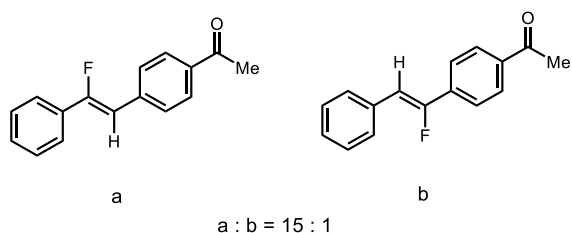

Prepared following the general procedure (**condition D**): 2,6-dichloropyridinium tetrafluoroborate (0.4 mmol, 94 mg, 2.0 equiv) dry DCE (2.0 mL), 1-(4-(phenylethynyl)phenyl)ethan-1-one (0.2 mmol, 44 mg, 1.0 equiv) at 100 °C. The reaction mixture was quenched after 12 h, and the crude residue was purified by flash column chromatography (hexanes/EtOAc = 10 : 1) to provide the title compound **77** with spectral properties identical to the reported in the literature<sup>[2]</sup>. Pale yellow oil (15 mg, 32% yield, r.r. = 15 : 1, *Z/E* = 17 : 1).

<sup>1</sup>H NMR (500 MHz, CDCl<sub>3</sub>) δ 7.97 (d, *J* = 8.4 Hz, 2H), 7.72 (d, *J* = 8.3 Hz, 2H), 7.68 (d, *J* = 6.9 Hz, 2H), 7.46 – 7.39 (m, 3H), 6.37 (d, *J* = 38.9 Hz, 1H), 2.62 (s, 3H).

<sup>19</sup>F NMR (471 MHz, CDCl<sub>3</sub>) δ (a-*E*): -91.0 (d, *J* = 20.7 Hz), (a-*Z*): -110.2 (d, *J* = 38.9 Hz), (b): -115.2 (d, *J* = 39.1 Hz).

**(Z)-4-(2-Fluoro-2-phenylvinyl)benzotrile (78)**

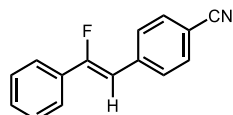

Prepared following the general procedure (**condition D**): 2,6-dichloropyridinium tetrafluoroborate (0.4 mmol, 94 mg, 2.0 equiv) dry DCE (2.0 mL), 4-(phenylethynyl)benzotrile (0.2 mmol, 41 mg, 1.0 equiv) at 100 °C. The reaction mixture was quenched after 12 h, and the crude residue was purified by flash column chromatography (hexanes/EtOAc = 10 : 1) to provide the title compound **78** with spectral properties identical to the reported in the literature<sup>[1]</sup>. Pale yellow oil (24 mg, 54% yield, r.r. > 50 : 1, *Z/E* > 50 : 1).

<sup>1</sup>H NMR (500 MHz, CDCl<sub>3</sub>) δ 7.71 (d, *J* = 8.4 Hz, 2H), 7.69 – 7.60 (m, 4H), 7.51 – 7.37 (m, 3H), 6.33 (d, *J* = 38.3 Hz, 1H).

<sup>13</sup>C NMR (126 MHz, CDCl<sub>3</sub>) δ 159.5 (d, *J*<sub>C-F</sub> = 263.6 Hz), 138.3 (d, *J*<sub>C-F</sub> = 3.1 Hz), 132.3, 131.9 (d, *J*<sub>C-F</sub> = 27.4 Hz), 130.0, 129.2 (d, *J*<sub>C-F</sub> = 8.6 Hz), 128.8 (d, *J*<sub>C-F</sub> = 2.1 Hz), 124.7 (d, *J*<sub>C-F</sub> = 7.7 Hz), 119.0, 110.3 (d, *J*<sub>C-F</sub> = 3.1 Hz), 104.4 (d, *J*<sub>C-F</sub> = 9.9 Hz).

<sup>19</sup>F NMR (471 MHz, CDCl<sub>3</sub>) δ -108.9 (d, *J* = 38.4 Hz).

**(Z)-1-(2-Fluoro-2-phenylvinyl)-4-nitrobenzene (79)**

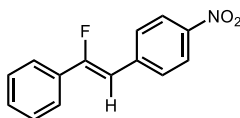

Prepared following the general procedure (**condition D**): 2,6-dichloropyridinium tetrafluoroborate (0.4 mmol, 94 mg, 2.0 equiv) dry DCE (2.0 mL), 1-nitro-4-(phenylethynyl)benzene (0.2 mmol, 45 mg, 1.0 equiv) at 100 °C. The reaction mixture was quenched after 12 h, and the crude residue was purified by flash column chromatography (hexanes/EtOAc = 10 : 1) to provide the title compound **79** with spectral properties identical to the reported in the literature<sup>[2]</sup>. Pale yellow oil (19 mg, 38% yield, r.r. > 50 : 1, *Z/E* > 50 : 1).

**<sup>1</sup>H NMR** (500 MHz, CDCl<sub>3</sub>) δ 8.23 (d, *J* = 8.9 Hz, 2H), 7.77 (d, *J* = 8.8 Hz, 2H), 7.73 – 7.64 (m, 2H), 7.51 – 7.38 (m, 3H), 6.39 (d, *J* = 38.2 Hz, 1H).

**<sup>13</sup>C NMR** (126 MHz, CDCl<sub>3</sub>) δ 159.9 (d, *J*<sub>C-F</sub> = 264.7 Hz), 146.3, 140.4 (d, *J*<sub>C-F</sub> = 3.1 Hz), 131.8 (d, *J*<sub>C-F</sub> = 27.3 Hz), 130.2, 129.3 (d, *J*<sub>C-F</sub> = 8.8 Hz), 128.8 (d, *J*<sub>C-F</sub> = 2.0 Hz), 124.8 (d, *J*<sub>C-F</sub> = 7.7 Hz), 123.9, 104.1 (d, *J*<sub>C-F</sub> = 9.9 Hz).

**<sup>19</sup>F NMR** (471 MHz, CDCl<sub>3</sub>) δ -108.2 (d, *J* = 38.2 Hz).

**(Z)-1-Chloro-2-(2-fluoro-2-phenylvinyl)benzene (80)**

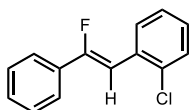

Prepared following the general procedure (**condition D**): 2,6-dichloropyridinium tetrafluoroborate (0.4 mmol, 94 mg, 2.0 equiv) dry DCE (2.0 mL), 1-chloro-2-(phenylethynyl)benzene (0.2 mmol, 42 mg, 1.0 equiv) at 100 °C. The reaction mixture was quenched after 12 h, and the crude residue was purified by flash column chromatography (hexanes) to provide the title compound **80** with spectral properties identical to the reported in the literature<sup>[1]</sup>. Pale yellow oil (24 mg, 51% yield, r.r. > 20 : 1, *Z/E* > 20 : 1).

**<sup>1</sup>H NMR** (500 MHz, CDCl<sub>3</sub>) δ 7.98 (dd, *J* = 7.9, 1.4 Hz, 1H), 7.75 – 7.64 (m, 2H), 7.50 – 7.34 (m, 4H), 7.30 (t, *J* = 7.5 Hz, 1H), 7.20 (td, *J* = 7.8, 1.5 Hz, 1H), 6.76 (d, *J* = 38.6 Hz, 1H).

**<sup>13</sup>C NMR** (126 MHz, CDCl<sub>3</sub>) δ 158.2 (d, *J*<sub>C-F</sub> = 260.9 Hz), 133.2 (d, *J*<sub>C-F</sub> = 0.6 Hz), 132.6 (d, *J*<sub>C-F</sub> = 27.9 Hz), 131.5 (d, *J*<sub>C-F</sub> = 3.4 Hz), 130.5 (d, *J*<sub>C-F</sub> = 13.4 Hz), 129.5, 129.4, 128.6 (d, *J*<sub>C-F</sub> = 2.1 Hz), 128.3 (d, *J*<sub>C-F</sub> = 1.6 Hz), 126.8, 124.6 (d, *J*<sub>C-F</sub> = 7.4 Hz), 101.7 (d, *J*<sub>C-F</sub> = 8.9 Hz).

**<sup>19</sup>F NMR** (471 MHz, CDCl<sub>3</sub>) δ -113.8 (d, *J* = 38.6 Hz).

**(E)-1-Fluoroethene-1,2-diyl)dibenzene (81)**

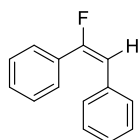

Prepared following the general procedure (**condition C**): 2,6-dichloropyridinium tetrafluoroborate (0.6 mmol, 141 mg, 3.0 equiv), dry CHCl<sub>3</sub> (3.0 mL), 1,2-diphenylethyne (0.2 mmol, 36 mg, 1.0 equiv) at 80

°C. The reaction mixture was quenched after 12 h, and the crude residue was purified by flash column chromatography (hexanes) to provide the title compound **81** with spectral properties identical to the reported in the literature<sup>[15]</sup>. Pale yellow oil (24 mg, 60% yield, *E/Z* = 10 : 1).

<sup>1</sup>H NMR (500 MHz, CDCl<sub>3</sub>) δ 7.43 (d, *J* = 7.0 Hz, 2H), 7.34 – 7.27 (m, 3H), 7.24 – 7.13 (m, 5H), 6.46 (d, *J* = 21.6 Hz, 1H).

<sup>19</sup>F NMR (471 MHz, CDCl<sub>3</sub>) δ -96.0 (d, *J* = 21.6 Hz).

**(*E*)-4,4'-(1-Fluoroethene-1,2-diyl)bis(chlorobenzene) (82)**

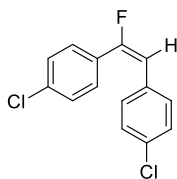

Prepared following the general procedure (**condition C**): 2,6-dichloropyridinium tetrafluoroborate (0.6 mmol, 141 mg, 3.0 equiv), dry CHCl<sub>3</sub> (3.0 mL), 1,2-bis(4-chlorophenyl)ethyne (0.2 mmol, 49 mg, 1.0 equiv) at 100 °C. The reaction mixture was quenched after 12 h, and the crude residue was purified by flash column chromatography (hexanes) to provide the title compound **82** with spectral properties identical to the reported in the literature<sup>[17]</sup>. Pale yellow oil (22 mg, 41% yield, *E/Z* = 10 : 1).

<sup>1</sup>H NMR (500 MHz, CDCl<sub>3</sub>) δ 7.33 (d, *J* = 8.5 Hz, 2H), 7.28 (d, *J* = 8.4 Hz, 2H), 7.21 (d, *J* = 8.5 Hz, 2H), 7.08 (d, *J* = 8.3 Hz, 2H), 6.41 (d, *J* = 20.8 Hz, 1H).

<sup>19</sup>F NMR (471 MHz, CDCl<sub>3</sub>) δ -95.9 (d, *J* = 20.8 Hz).

**(*E*)-1-Chloro-2-(2-fluoro-2-phenylvinyl)benzene (83)**

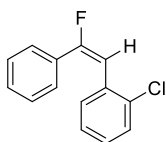

Prepared following the general procedure (**condition C**): 2,6-dichloropyridinium tetrafluoroborate (0.6 mmol, 141 mg, 3.0 equiv), dry CHCl<sub>3</sub> (3.0 mL), 1-chloro-2-(phenylethynyl)benzene (0.2 mmol, 42 mg, 1.0 equiv) at 100 °C. The reaction mixture was quenched after 12 h, and the crude residue was purified by flash column chromatography (hexanes) to provide the title compound **83** with spectral properties identical to the reported in the literature<sup>[1]</sup>. Pale yellow oil (19 mg, 40% yield, r.r. = 9 : 1, *E/Z* = 4 : 1).

<sup>1</sup>H NMR (500 MHz, CDCl<sub>3</sub>) δ 7.98 (dd, *J* = 7.9, 1.6 Hz, 0.2H), 7.73 – 7.66 (m, 0.8H), 7.48 – 7.23 (m, 6H), 7.23 – 7.12 (m, 1H), 7.11 – 7.01 (m, 1H), 6.75 (d, *J* = 38.6 Hz, 0.2H), 6.54 (d, *J* = 20.5 Hz, 0.8H).

<sup>19</sup>F NMR (471 MHz, CDCl<sub>3</sub>) δ (*E*): -96.4 (d, *J* = 20.5 Hz, 0.8F), (*Z*): -113.9 (d, *J* = 38.5 Hz, 0.2F).

**(*E*)-1-(2-Fluoro-2-phenylvinyl)-4-(trifluoromethyl)benzene (84)**

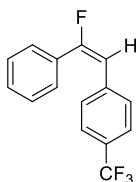

Prepared following the general procedure (**condition C**): 2,6-dichloropyridinium tetrafluoroborate (0.6 mmol, 141 mg, 3.0 equiv), dry  $\text{CHCl}_3$  (3.0 mL), 1-(phenylethynyl)-4-(trifluoromethyl)benzene (0.2 mmol, 49 mg, 1.0 equiv) at 100 °C. The reaction mixture was quenched after 12 h, and the crude residue was purified by flash column chromatography (hexanes) to provide the title compound **84** with spectral properties identical to the reported in the literature<sup>[1]</sup>. Pale yellow oil (12 mg, 23% yield, r.r. > 20 : 1, *E/Z* > 20 : 1).

**<sup>1</sup>H NMR** (500 MHz,  $\text{CDCl}_3$ )  $\delta$  7.47 (d, *J* = 8.2 Hz, 2H), 7.42 (d, *J* = 7.6 Hz, 2H), 7.37 – 7.30 (m, 3H), 7.26 (d, *J* = 7.9 Hz, 2H), 6.46 (d, *J* = 20.6 Hz, 1H).

**<sup>19</sup>F NMR** (471 MHz,  $\text{CDCl}_3$ )  $\delta$  -62.6 (s, 3F), -91.6 (d, *J* = 20.7 Hz, 1F).

**(1*S*,2*R*,4*R*)-2-((*Z*)-2-Fluoro-2-phenylvinyl)bicyclo[2.2.1]heptane (**85**)**

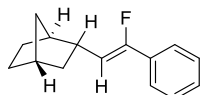

Prepared following the general procedure (**condition A**): 2,6-dichloropyridinium tetrafluoroborate (0.2 mmol, 47 mg, 1.0 equiv),  $\text{LiBF}_4$  (0.25 mmol, 4.7 mg, 0.25 equiv), dry  $\text{CHCl}_3$  (1.0 mL), (1*S*,2*R*,4*R*)-2-(phenylethynyl)bicyclo[2.2.1]heptane (0.2 mmol, 39 mg, 1.0 equiv) at 70 °C. The reaction mixture was quenched after 6 h, and the crude residue was purified by flash column chromatography (hexanes) to provide the title compound **85**. Pale yellow oil (33 mg, 77% yield, *Z/E* > 50 : 1).

**<sup>1</sup>H NMR** (500 MHz,  $\text{CDCl}_3$ )  $\delta$  7.53 – 7.45 (m, 2H), 7.38 – 7.31 (m, 2H), 7.31 – 7.26 (m, 1H), 5.29 (dd, *J* = 37.6, 9.4 Hz, 1H), 2.75 – 2.66 (m, 1H), 2.33 – 2.26 (m, 1H), 2.15 – 2.08 (m, 1H), 1.73 – 1.64 (m, 1H), 1.60 – 1.48 (m, 2H), 1.46 – 1.41 (m, 1H), 1.37 – 1.26 (m, 2H), 1.25 – 1.18 (m, 2H).

**<sup>13</sup>C NMR** (126 MHz,  $\text{CDCl}_3$ )  $\delta$  154.7 (d,  $J_{\text{C-F}}$  = 245.3 Hz), 132.9 (d,  $J_{\text{C-F}}$  = 29.2 Hz), 128.3 (d,  $J_{\text{C-F}}$  = 2.0 Hz), 128.2, 123.8 (d,  $J_{\text{C-F}}$  = 7.0 Hz), 112.7 (d,  $J_{\text{C-F}}$  = 16.9 Hz), 42.9 (d,  $J_{\text{C-F}}$  = 1.0 Hz), 39.2 (d,  $J_{\text{C-F}}$  = 1.3 Hz), 37.2 (d,  $J_{\text{C-F}}$  = 3.7 Hz), 36.5, 36.1, 29.6, 28.8.

**<sup>19</sup>F NMR** (471 MHz,  $\text{CDCl}_3$ )  $\delta$  -121.2 (d, *J* = 37.6 Hz).

**HRMS** (ASAP) calcd for  $\text{C}_{15}\text{H}_{17}\text{F}$  [ $\text{M}]^+$ : 216.1314, Found: 216.1326.

**((*Z*)-5-Fluoro-5-phenylpent-4-en-1-yloxy)carbonyl ferrocene (**86**)**

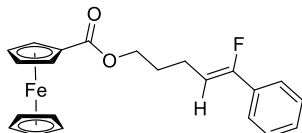

Prepared following the general procedure (**condition A**): 2,6-dichloropyridinium tetrafluoroborate (0.4

mmol, 94 mg, 2.0 equiv), Et<sub>2</sub>O•BF<sub>3</sub> (0.2 mmol, 25 μL, 1.0 equiv), dry CHCl<sub>3</sub> (2.0 mL), (5-phenylpent-4-yn-1-yloxy)carbonyl ferrocene (0.2 mmol, 74 mg, 1.0 equiv) at 70 °C. The reaction mixture was quenched after 6 h, and the crude residue was purified by flash column chromatography (hexanes/EtOAc = 10 : 1) to provide the title compound **86**. Pale yellow oil (with Et<sub>2</sub>O•BF<sub>3</sub>: 48 mg, 61% yield, Z/E = 9 : 1; without Et<sub>2</sub>O•BF<sub>3</sub>: 53 mg, 68% yield, Z/E = 3 : 1).

<sup>1</sup>H NMR (500 MHz, CDCl<sub>3</sub>) δ 7.55 – 7.47 (m, 2H), 7.43 – 7.29 (m, 3H), 5.46 (dt, *J* = 36.9, 7.6 Hz, 1H), 4.83 (t, *J* = 1.9 Hz, 2H), 4.43 – 4.35 (m, 2H), 4.28 (t, *J* = 6.4 Hz, 2H), 4.21 (s, 4H), 4.15 (s, 1H), 2.52 – 2.33 (m, 2H), 1.98 – 1.83 (m, 2H).

<sup>13</sup>C NMR (126 MHz, CDCl<sub>3</sub>) δ 171.7, 157.4 (d, *J*<sub>C-F</sub> = 247.0 Hz), 132.5 (d, *J*<sub>C-F</sub> = 29.1 Hz), 128.5, 128.4 (d, *J*<sub>C-F</sub> = 1.9 Hz), 123.9 (d, *J*<sub>C-F</sub> = 6.9 Hz), 104.7 (d, *J*<sub>C-F</sub> = 17.6 Hz), 71.2, 70.1, 69.7, 63.5, 28.7 (d, *J*<sub>C-F</sub> = 1.5 Hz), 20.8 (d, *J*<sub>C-F</sub> = 5.4 Hz).

<sup>19</sup>F NMR (471 MHz, CDCl<sub>3</sub>) δ (*E*): -100.5 (d, *J* = 22.1 Hz), (*Z*): -119.8 (d, *J* = 36.9 Hz).

HRMS (APCI) calcd for C<sub>22</sub>H<sub>21</sub>FFeO<sub>2</sub> [M]<sup>+</sup>: 392.0875, Found: 392.0891.

#### (*Z*)-5-Fluoro-5-phenylpent-4-en-1-yl

#### ((1*S*,4*R*)-7,7-dimethyl-2-oxobicyclo[2.2.1]heptan-1-yl)methanesulfonate (**87**)

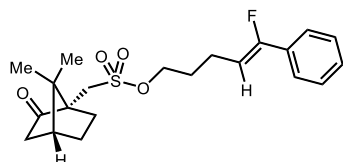

Prepared following the general procedure (**condition A**): 2,6-dichloropyridinium tetrafluoroborate (0.4 mmol, 94 mg, 2.0 equiv), Et<sub>2</sub>O•BF<sub>3</sub> (0.2 mmol, 25 μL, 1.0 equiv), dry CHCl<sub>3</sub> (2.0 mL), 5-phenylpent-4-yn-1-yl ((1*S*,4*R*)-7,7-dimethyl-2-oxobicyclo[2.2.1]heptan-1-yl)methanesulfonate (0.2 mmol, 75 mg, 1.0 equiv) at 70 °C. The reaction mixture was quenched after 6 h, and the crude residue was purified by flash column chromatography (hexanes/EtOAc = 5 : 1) to provide the title compound **87**. Pale yellow oil (with Et<sub>2</sub>O•BF<sub>3</sub>: 50 mg, 64% yield, Z/E = 9 : 1; without Et<sub>2</sub>O•BF<sub>3</sub>: 55 mg, 70% yield, Z/E = 2.8 : 1).

<sup>1</sup>H NMR (500 MHz, CDCl<sub>3</sub>) δ 7.49 (d, *J* = 7.3 Hz, 2H), 7.38 – 7.27 (m, 3H), 5.40 (dt, *J* = 36.8, 7.6 Hz, 1H), 4.41 – 4.26 (m, 2H), 3.61 (d, *J* = 15.1 Hz, 1H), 2.99 (d, *J* = 15.1 Hz, 1H), 2.52 – 2.35 (m, 4H), 2.11 (t, *J* = 4.3 Hz, 1H), 2.07 – 2.01 (m, 1H), 1.96 – 1.89 (m, 3H), 1.71 – 1.62 (m, 1H), 1.47 – 1.38 (m, 1H), 1.10 (s, 3H), 0.86 (s, 3H).

<sup>13</sup>C NMR (126 MHz, CDCl<sub>3</sub>) δ 214.4, 157.6 (d, *J*<sub>C-F</sub> = 247.6 Hz), 132.2 (d, *J*<sub>C-F</sub> = 29.0 Hz), 128.6, 128.4 (d, *J*<sub>C-F</sub> = 1.9 Hz), 123.9 (d, *J*<sub>C-F</sub> = 6.9 Hz), 103.9 (d, *J*<sub>C-F</sub> = 17.5 Hz), 69.8, 57.8, 47.9, 46.6, 42.7, 42.4, 28.9 (d, *J*<sub>C-F</sub> = 1.6 Hz), 26.8, 24.8, 20.2 (d, *J*<sub>C-F</sub> = 5.5 Hz), 19.7, 19.6.

<sup>19</sup>F NMR (282 MHz, CDCl<sub>3</sub>) δ (*E*): -99.9 (d, *J* = 21.7 Hz), (*Z*): -119.2 (d, *J* = 36.8 Hz).

HRMS (ESI) calcd for C<sub>21</sub>H<sub>28</sub>FO<sub>4</sub>S [M+H]<sup>+</sup>: 395.1689, Found: 395.1674.

#### (8*R*,9*S*,13*S*,14*S*)-3-((*Z*)-2-Cyclohexyl-1-fluorovinyl)-13-methyl-6,7,8,9,11,12,13,14,15,16-decahydro-17H-cyclopenta[*a*]phenanthren-17-one (**88**)

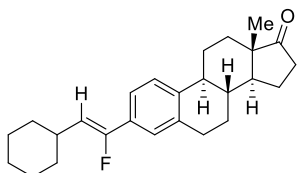

Prepared following the general procedure (**condition A**): 2,6-dichloropyridinium tetrafluoroborate (0.2 mmol, 47 mg, 1.0 equiv), LiBF<sub>4</sub> (0.25 mmol, 4.7 mg, 0.25 equiv), dry CHCl<sub>3</sub> (1.0 mL), (8*R*,9*S*,13*S*,14*S*)-3-(cyclohexylethynyl)-13-methyl-6,7,8,9,11,12,13,14,15,16-decahydro-17*H*-cyclopenta[*a*]phenanthren-17-one (0.2 mmol, 72 mg, 1.0 equiv) at 70 °C. The reaction mixture was quenched after 6 h, and the crude residue was purified by flash column chromatography (hexanes/EtOAc = 10 : 1) to provide the title compound **88**. Pale yellow oil (55 mg, 72% yield, *Z/E* > 50 : 1).

**<sup>1</sup>H NMR** (500 MHz, CDCl<sub>3</sub>) δ 7.26 (m, 2H), 7.22 (s, 1H), 5.21 (dd, *J* = 38.4, 9.2 Hz, 1H), 2.98 – 2.85 (m, 2H), 2.62 (m, 1H), 2.51 (dd, *J* = 18.9, 8.6 Hz, 1H), 2.46 – 2.38 (m, 1H), 2.30 (td, *J* = 10.8, 4.2 Hz, 1H), 2.20 – 2.10 (m, 1H), 2.10 – 2.00 (m, 2H), 1.99 – 1.93 (m, 1H), 1.81 – 1.69 (m, 4H), 1.68 – 1.57 (m, 3H), 1.55 – 1.42 (m, 4H), 1.40 – 1.30 (m, 2H), 1.23 – 1.11 (m, 3H), 0.91 (s, 3H).

**<sup>13</sup>C NMR** (126 MHz, CDCl<sub>3</sub>) δ 220.7, 155.4 (d, *J*<sub>C-F</sub> = 245.2 Hz), 140.0, 136.5, 130.5 (d, *J*<sub>C-F</sub> = 29.5 Hz), 125.4 (d, *J*<sub>C-F</sub> = 1.8 Hz), 124.3 (d, *J*<sub>C-F</sub> = 6.6 Hz), 121.4 (d, *J*<sub>C-F</sub> = 6.8 Hz), 111.4 (d, *J*<sub>C-F</sub> = 17.1 Hz), 50.5, 47.9, 44.4, 38.1, 35.8, 33.8 (d, *J*<sub>C-F</sub> = 3.8 Hz), 33.2, 31.6, 29.4, 26.4, 26.0, 25.8, 25.7, 21.6, 13.8.

**<sup>19</sup>F NMR** (471 MHz, CDCl<sub>3</sub>) δ -121.8 (d, *J* = 38.3 Hz).

**HRMS** (ASAP) calcd for C<sub>26</sub>H<sub>34</sub>FO [M+H]<sup>+</sup>: 381.2588, Found: 381.2578.

**(8*R*,9*S*,13*S*,14*S*)-3-((*E*)-2-cyclohexyl-1-fluorovinyl)-13-methyl-6,7,8,9,11,12,13,14,15,16-decahydro-17*H*-cyclopenta[*a*]phenanthren-17-one (**89**)**

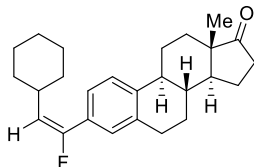

Prepared following the general procedure (**condition B**): (8*R*,9*S*,13*S*,14*S*)-3-(cyclohexylethynyl)-13-methyl-6,7,8,9,11,12,13,14,15,16-decahydro-17*H*-cyclopenta[*a*]phenanthren-17-one (0.2 mmol, 72 mg, 1.0 equiv), dry CHCl<sub>3</sub> (1.0 mL), HBF<sub>4</sub>·Et<sub>2</sub>O (27 μL, 0.2 mmol, 1.0 equiv) at room temperature. The reaction mixture was quenched after 6 h, and the crude residue was purified by flash column chromatography (hexanes/EtOAc = 10 : 1) to provide the title compound **89**. Pale yellow oil (37 mg, 49% yield, *E/Z* = 13:1).

**<sup>1</sup>H NMR** (500 MHz, CDCl<sub>3</sub>) δ 7.32 (d, *J* = 8.1 Hz, 1H), 7.23 (d, *J* = 7.8 Hz, 1H), 7.19 (s, 1H), 5.21 (dd, *J* = 23.0, 10.7 Hz, 1H), 2.94 (dd, *J* = 8.7, 3.9 Hz, 2H), 2.52 (dd, *J* = 19.0, 8.7 Hz, 1H), 2.47 – 2.42 (m, 1H), 2.37 – 2.24 (m, 2H), 2.18 – 2.11 (m, 1H), 2.09 – 2.02 (m, 2H), 2.01 – 1.96 (m, 1H), 1.78 – 1.69 (m, 4H), 1.67 – 1.61 (m, 3H), 1.57 – 1.46 (m, 4H), 1.27 – 1.16 (m, 5H), 0.92 (s, 3H).

**<sup>13</sup>C NMR** (126 MHz, CDCl<sub>3</sub>) δ 220.6, 155.8 (d, *J*<sub>C-F</sub> = 239.9 Hz), 140.6, 136.4, 123.0 (d, *J*<sub>C-F</sub> = 30.3 Hz), 127.9 (d, *J*<sub>C-F</sub> = 4.7 Hz), 125.2, 124.9 (d, *J*<sub>C-F</sub> = 5.2 Hz), 114.0 (d, *J*<sub>C-F</sub> = 22.2 Hz), 50.5, 47.9, 44.5, 38.0, 35.8, 35.2 (d, *J*<sub>C-F</sub> = 7.6 Hz), 33.8 (d, *J*<sub>C-F</sub> = 0.8 Hz), 31.6, 29.4, 26.4, 25.9, 25.7, 25.6, 21.6, 13.8.



$^{19}\text{F}$  NMR (471 MHz,  $\text{CDCl}_3$ )  $\delta$  (E): -103.5 (d,  $J = 23.0$  Hz), (Z): -121.7 (d,  $J = 38.3$  Hz).

HRMS (ESI) calcd for  $\text{C}_{26}\text{H}_{34}\text{FO}$   $[\text{M}+\text{H}]^+$ : 381.2594, Found: 381.2577.

**(Z)-5-Fluoro-5-phenylpent-4-en-1-yl 4-(*N,N*-dipropylsulfamoyl)benzoate (90)**

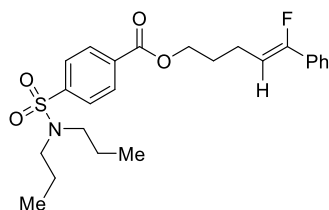

Prepared following the general procedure (**condition A**): 2,6-dichloropyridinium tetrafluoroborate (0.4 mmol, 94 mg, 2.0 equiv), dry  $\text{CHCl}_3$  (2.0 mL), 5-phenylpent-4-en-1-yl 4-(*N,N*-dipropylsulfamoyl)benzoate (0.2 mmol, 85 mg, 1.0 equiv) at 80 °C. The reaction mixture was quenched after 12 h, and the crude residue was purified by flash column chromatography (hexanes/EtOAc = 5 : 1) to provide the title compound **90**. Pale yellow oil (63 mg, 70% yield,  $Z/E = 33 : 1$ ).

$^1\text{H}$  NMR (500 MHz,  $\text{CDCl}_3$ )  $\delta$  8.15 (d,  $J = 8.5$  Hz, 2H), 7.85 (d,  $J = 8.5$  Hz, 2H), 7.53 – 7.44 (m, 2H), 7.39 – 7.29 (m, 3H), 5.44 (dt,  $J = 36.8, 7.7$  Hz, 1H), 4.42 (t,  $J = 6.4$  Hz, 2H), 3.14 – 3.05 (m, 4H), 2.47 (qd,  $J = 7.5, 1.5$  Hz, 2H), 2.03 – 1.92 (m, 2H), 1.58 – 1.52 (m, 4H), 0.87 (t,  $J = 7.4$  Hz, 6H).

$^{13}\text{C}$  NMR (126 MHz,  $\text{CDCl}_3$ )  $\delta$  165.3, 157.5 (d,  $J_{\text{C-F}} = 247.3$  Hz), 144.2, 133.6, 132.4 (d,  $J_{\text{C-F}} = 29.0$  Hz), 130.2, 128.6, 128.4 (d,  $J_{\text{C-F}} = 2.0$  Hz), 127.0, 123.9 (d,  $J_{\text{C-F}} = 7.0$  Hz), 104.5 (d,  $J_{\text{C-F}} = 17.6$  Hz), 65.0, 49.9, 28.4 (d,  $J_{\text{C-F}} = 1.4$  Hz), 21.9, 20.9 (d,  $J_{\text{C-F}} = 5.5$  Hz), 11.1.

$^{19}\text{F}$  NMR (376 MHz,  $\text{CDCl}_3$ )  $\delta$  -119.8 (d,  $J = 36.9$  Hz).

HRMS (ESI) calcd for  $\text{C}_{24}\text{H}_{31}\text{FNO}_4\text{S}$   $[\text{M}+\text{H}]^+$ : 448.1952, Found: 448.1934.

**4,4-Difluoropentyl 4-(*N,N*-dipropylsulfamoyl)benzoate (91)**

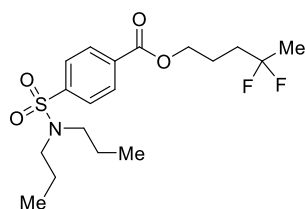

Prepared following the general procedure (**condition C**): 2,6-dichloropyridinium tetrafluoroborate (0.6 mmol, 141 mg, 3.0 equiv), dry  $\text{CHCl}_3$  (3.0 mL), pent-4-en-1-yl 4-(*N,N*-dipropylsulfamoyl)benzoate (0.2 mmol, 70 mg, 1.0 equiv) at 80 °C. The reaction mixture was quenched after 12 h, and the crude residue was purified by flash column chromatography (hexanes/EtOAc = 5 : 1) to provide the title compound **91** with spectral properties identical to the reported in the literature<sup>[7]</sup>. Pale yellow oil (44 mg, 56% yield).

$^1\text{H}$  NMR (500 MHz,  $\text{CDCl}_3$ )  $\delta$  8.15 (d,  $J = 8.5$  Hz, 2H), 7.88 (d,  $J = 8.5$  Hz, 2H), 4.40 (t,  $J = 6.0$  Hz, 2H), 3.15 – 3.05 (m, 4H), 2.09 – 1.92 (m, 4H), 1.64 (t,  $J = 18.4$  Hz, 3H), 1.58 – 1.51 (m, 4H), 0.87 (t,  $J = 7.4$  Hz, 6H).

$^{13}\text{C}$  NMR (126 MHz,  $\text{CDCl}_3$ )  $\delta$  165.1, 144.4, 133.4, 130.2, 127.0, 123.7 (t,  $J_{\text{C-F}} = 238.1$  Hz), 64.8, 49.9, 34.6 (t,  $J_{\text{C-F}} = 26.1$  Hz), 23.5 (t,  $J_{\text{C-F}} = 27.9$  Hz), 22.2 (t,  $J_{\text{C-F}} = 4.7$  Hz), 21.9, 11.1.

$^{19}\text{F}$  NMR (471 MHz,  $\text{CDCl}_3$ )  $\delta$  -91.2 – -91.6 (m, 2F).

**(Z)-5-Fluoro-5-phenylpent-4-en-1-yl**

**2-(3-cyano-4-isobutoxyphenyl)-4-methylthiazole-5-carboxylate (92)**

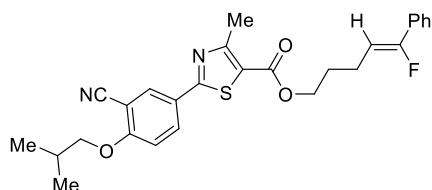

Prepared following the general procedure (**condition A**): 2,6-dichloropyridinium tetrafluoroborate (0.4 mmol, 94 mg, 2.0 equiv), dry  $\text{CHCl}_3$  (2.0 mL), 5-phenylpent-4-en-1-yl 2-(3-cyano-4-isobutoxyphenyl)-4-methylthiazole-5-carboxylate (0.2 mmol, 92 mg, 1.0 equiv) at 80 °C. The reaction mixture was quenched after 12 h, and the crude residue was purified by flash column chromatography (hexanes/EtOAc = 5 : 1) to provide the title compound **92**. Pale yellow oil (50 mg, 52% yield,  $Z/E > 20 : 1$ ).

$^1\text{H}$  NMR (500 MHz,  $\text{CDCl}_3$ )  $\delta$  8.13 (d,  $J = 2.2$  Hz, 1H), 8.06 (dd,  $J = 8.8, 2.3$  Hz, 1H), 7.50 (d,  $J = 7.0$  Hz, 2H), 7.40 – 7.27 (m, 3H), 7.00 (d,  $J = 8.9$  Hz, 1H), 5.44 (dt,  $J = 36.8, 7.7$  Hz, 1H), 4.37 (t,  $J = 6.3$  Hz, 2H), 3.90 (d,  $J = 6.5$  Hz, 2H), 2.77 (s, 3H), 2.46 (dd,  $J = 13.4, 7.1$  Hz, 2H), 2.28 – 2.14 (m, 1H), 2.01 – 1.86 (m, 2H), 1.09 (d,  $J = 6.7$  Hz, 6H).

$^{13}\text{C}$  NMR (126 MHz,  $\text{CDCl}_3$ )  $\delta$  167.2, 162.5, 162.0, 161.2, 157.4 (d,  $J_{\text{C-F}} = 247.2$  Hz), 132.5, 132.4 (d,  $J_{\text{C-F}} = 28.7$  Hz), 132.1, 128.6, 128.4 (d,  $J_{\text{C-F}} = 1.9$  Hz), 126.0, 123.9 (d,  $J_{\text{C-F}} = 7.0$  Hz), 121.8, 115.4, 112.6, 104.5 (d,  $J_{\text{C-F}} = 17.6$  Hz), 103.0, 75.7, 64.8, 28.4, 28.2, 21.0 (d,  $J_{\text{C-F}} = 5.5$  Hz), 19.0, 17.5.

$^{19}\text{F}$  NMR (471 MHz,  $\text{CDCl}_3$ )  $\delta$  -119.8 (d,  $J = 36.9$  Hz).

HRMS (ESI) calcd for  $\text{C}_{27}\text{H}_{28}\text{FN}_2\text{O}_3\text{S}$   $[\text{M}+\text{H}]^+$ : 479.1799, Found: 479.1784.

**4,4-Difluoropentyl 2-(3-cyano-4-isobutoxyphenyl)-4-methylthiazole-5-carboxylate (93)**

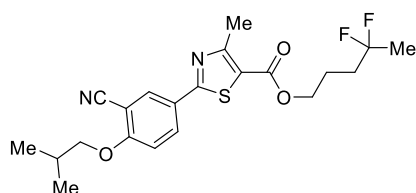

Prepared following the general procedure (**condition C**): 2,6-dichloropyridinium tetrafluoroborate (0.6 mmol, 141 mg, 3.0 equiv), dry  $\text{CHCl}_3$  (3.0 mL), pent-4-en-1-yl 2-(3-cyano-4-isobutoxyphenyl)-4-methylthiazole-5-carboxylate (0.2 mmol, 76 mg, 1.0 equiv) at 80 °C. The reaction mixture was quenched after 12 h, and the crude residue was purified by flash column chromatography (hexanes/EtOAc = 5 : 1) to provide the title compound **93** with spectral properties identical to the reported in the literature<sup>[7]</sup>. Pale yellow oil (36 mg, 43% yield).

**<sup>1</sup>H NMR** (500 MHz, CDCl<sub>3</sub>) δ 8.18 (d, *J* = 2.3 Hz, 1H), 8.10 (dd, *J* = 8.8, 2.3 Hz, 1H), 7.01 (d, *J* = 8.9 Hz, 1H), 4.34 (t, *J* = 6.0 Hz, 2H), 3.90 (d, *J* = 6.5 Hz, 2H), 2.77 (s, 3H), 2.26 – 2.14 (m, 1H), 2.06 – 1.90 (m, 4H), 1.65 (t, *J* = 18.4 Hz, 3H), 1.09 (d, *J* = 6.7 Hz, 6H).

**<sup>13</sup>C NMR** (126 MHz, CDCl<sub>3</sub>) δ 167.4, 162.5, 161.9, 161.4, 132.6, 132.1, 126.0, 123.7 (t, *J*<sub>C-F</sub> = 238.1 Hz), 121.5, 115.4, 112.6, 103.0, 75.7, 64.5, 34.6 (t, *J*<sub>C-F</sub> = 26.0 Hz), 28.2, 23.5 (t, *J*<sub>C-F</sub> = 27.9 Hz), 22.2 (t, *J*<sub>C-F</sub> = 4.6 Hz), 19.0, 17.5.

**<sup>19</sup>F NMR** (471 MHz, CDCl<sub>3</sub>) δ -91.3 – -91.6 (m, 2F).

#### (*Z*)-5-Fluoro-5-phenylpent-4-en-1-yl

4'-((1,7'-dimethyl-2'-propyl-1H,3'H-[2,5'-bibenzo[d]imidazol]-3'-yl)methyl)-[1,1'-biphenyl]-2-carboxylate (**94**)

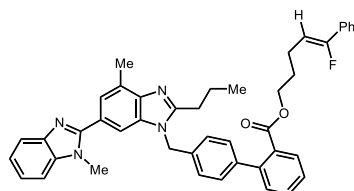

Prepared following the general procedure (**condition A**): 2,6-dichloropyridinium tetrafluoroborate (0.4 mmol, 94 mg, 2.0 equiv), Et<sub>3</sub>O • BF<sub>4</sub> (0.2 mmol, 25 μL, 1.0 equiv), dry CHCl<sub>3</sub> (2.0 mL), 5-phenylpent-4-en-1-yl 4'-((1,7'-dimethyl-2'-propyl-1H,3'H-[2,5'-bibenzo[d]imidazol]-3'-yl)methyl)-[1,1'-biphenyl]-2-carboxylate (0.2 mmol, 131 mg, 1.0 equiv) at 70 °C. The reaction mixture was quenched after 6 h, and the crude residue was purified by flash column chromatography (EtOAc) to provide the title compound **94**. Pale yellow oil (43 mg, 32% yield, *Z/E* > 20 : 1).

**<sup>1</sup>H NMR** (500 MHz, CDCl<sub>3</sub>) δ 7.83 (dd, *J* = 7.7, 1.0 Hz, 1H), 7.80 (dd, *J* = 5.9, 3.1 Hz, 1H), 7.50 (td, *J* = 7.6, 1.2 Hz, 1H), 7.47 – 7.40 (m, 4H), 7.38 (td, *J* = 7.6, 1.0 Hz, 1H), 7.35 – 7.25 (m, 9H), 7.09 (d, *J* = 8.1 Hz, 2H), 5.41 (s, 2H), 5.22 (dt, *J* = 37.2, 7.6 Hz, 1H), 4.06 (t, *J* = 6.3 Hz, 2H), 3.76 (s, 3H), 2.94 – 2.89 (m, 2H), 2.76 (s, 3H), 2.10 – 2.03 (m, 2H), 1.90 – 1.82 (m, 2H), 1.60 – 1.49 (m, 2H), 1.04 (t, *J* = 7.3 Hz, 3H).

**<sup>13</sup>C NMR** (126 MHz, CDCl<sub>3</sub>) δ 168.3, 157.1 (d, *J*<sub>C-F</sub> = 246.9 Hz), 156.4, 154.7, 143.2, 142.9, 141.7, 141.3, 136.6, 135.0, 134.8, 132.3 (d, *J*<sub>C-F</sub> = 29.0 Hz), 131.3, 130.8, 130.7, 129.9, 129.4, 129.0, 128.6, 128.4 (d, *J*<sub>C-F</sub> = 1.9 Hz), 127.4, 125.9, 123.9, 123.8, 123.8, 122.4, 122.2, 119.6, 109.5, 108.9, 104.6 (d, *J*<sub>C-F</sub> = 17.5 Hz), 64.4, 47.0, 31.7, 29.8, 28.0, 21.8, 20.6 (d, *J*<sub>C-F</sub> = 5.3 Hz), 16.8, 14.0.

**<sup>19</sup>F NMR** (471 MHz, CDCl<sub>3</sub>) δ -119.8 (d, *J* = 37.2 Hz).

**HRMS** (ESI) calcd for C<sub>44</sub>H<sub>42</sub>FN<sub>4</sub>O<sub>2</sub> [M+H]<sup>+</sup>: 677.3286 Found: 677.3261.

#### (*Z*)-(1-Fluoroprop-1-en-1-yl)benzene (**95**)

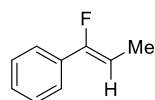

Prepared following the general procedure (**condition A**): 2,6-dichloropyridinium tetrafluoroborate (5.0 mmol, 1.18 g, 1.0 equiv), LiBF<sub>4</sub> (1.25 mmol, 117 mg, 0.25 equiv), dry CHCl<sub>3</sub> (25 mL), 1-phenyl-1-propyne (5.0 mmol, 580 mg, 1.0 equiv) at 70 °C. The reaction mixture was quenched after

12 h, and the crude residue was purified by flash column chromatography (hexanes) to provide the title compound **95** with spectral properties identical to the reported in the literature<sup>[18]</sup>. Pale yellow oil (394 mg, 58% yield, *Z/E* > 50 : 1).

<sup>1</sup>H NMR (500 MHz, CDCl<sub>3</sub>) δ 7.49 (d, *J* = 7.4 Hz, 2H), 7.35 (t, *J* = 7.7 Hz, 2H), 7.32 – 7.27 (m, 1H), 5.44 (dq, *J* = 37.2, 7.1 Hz, 1H), 1.82 (dd, *J* = 7.1, 2.5 Hz, 3H).

<sup>13</sup>C NMR (126 MHz, CDCl<sub>3</sub>) δ 157.3 (d, *J*<sub>C-F</sub> = 245.5 Hz), 132.9 (d, *J*<sub>C-F</sub> = 29.1 Hz), 128.4 (d, *J*<sub>C-F</sub> = 2.0 Hz), 128.2, 123.7 (d, *J*<sub>C-F</sub> = 6.9 Hz), 100.6 (d, *J*<sub>C-F</sub> = 18.2 Hz), 9.4 (d, *J*<sub>C-F</sub> = 6.7 Hz).

<sup>19</sup>F NMR (471 MHz, CDCl<sub>3</sub>) δ -121.6 (d, *J* = 37.2 Hz).

#### (*Z*)-(3-Bromo-1-fluoroprop-1-en-1-yl)benzene (**96**)

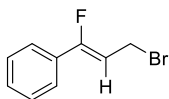

A solution of (*Z*)-(1-fluoroprop-1-en-1-yl)benzene **95** (300 mg, 2.2 mmol, 1.0 equiv), NBS (432 mg, 2.4 mmol, 1.1 equiv) and AIBN (36 mg, 0.22 mmol, 0.1 equiv) in dry CCl<sub>4</sub> (10 mL) was refluxed for 12 h under a nitrogen atmosphere. After completion of the reaction monitored by TLC, the reaction mixture was then cooled to room temperature. The floated succinimide was filtered off and the filtrate was washed with H<sub>2</sub>O and brine and dried with Na<sub>2</sub>SO<sub>4</sub>. The solution was filtered and concentrated. The residue was purified by column chromatography on silica gel (hexanes) to provide product **96** with spectral properties identical to the reported in the literature<sup>[19]</sup>. Pale yellow oil (433 mg, 92% yield, *Z/E* > 50 : 1).

<sup>1</sup>H NMR (500 MHz, CDCl<sub>3</sub>) δ 7.60 – 7.50 (m, 2H), 7.46 – 7.34 (m, 3H), 5.79 (dt, *J* = 33.0, 8.6 Hz, 1H), 4.27 (dd, *J* = 8.6, 1.7 Hz, 2H).

<sup>13</sup>C NMR (126 MHz, CDCl<sub>3</sub>) δ 159.9 (d, *J*<sub>C-F</sub> = 256.0 Hz), 131.3 (d, *J*<sub>C-F</sub> = 27.8 Hz), 130.0, 128.5, 124.8 (d, *J*<sub>C-F</sub> = 7.2 Hz), 102.7 (d, *J*<sub>C-F</sub> = 15.4 Hz), 24.5 (d, *J*<sub>C-F</sub> = 9.1 Hz).

<sup>19</sup>F NMR (471 MHz, CDCl<sub>3</sub>) δ -115.0 (d, *J* = 33.0 Hz)

#### (*Z*)-1-Benzhydryl-4-(3-fluoro-3-phenylallyl)piperazine (**97**)

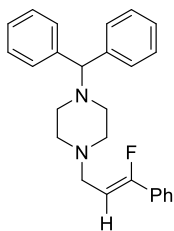

A solution of the (*Z*)-(3-bromo-1-fluoroprop-1-en-1-yl)benzene **96** (43 mg, 0.2 mmol, 1 equiv) in THF (0.5 M) was added dropwise to a solution of 1-(diphenylmethyl)piperazine (101 mg, 0.4 mmol, 2.0 equiv) in THF (2.5 M) at room temperature. 1 M aq NaOH (0.4 ml, 0.4 mmol, 2 equiv) was then added in one portion, and the reaction was stirred at room temperature for 6 h. The reaction was diluted with Et<sub>2</sub>O (10 ml). The organic layer was separated and the aqueous layer was extracted with Et<sub>2</sub>O (2 × 10 ml). The combined organics were washed with brine, dried (MgSO<sub>4</sub>) and concentrated in vacuo. The

residue was purified by flash column chromatography (hexane/EtOAc = 5 : 1) to afford the product **97**. Pale yellow oil (68 mg, 88% yield, *Z/E* > 50 : 1).

**<sup>1</sup>H NMR** (500 MHz, CDCl<sub>3</sub>) δ 7.47 – 7.40 (m, 2H), 7.34 (d, *J* = 7.2 Hz, 4H), 7.31 – 7.22 (m, 3H), 7.18 (dd, *J* = 8.4, 6.8 Hz, 4H), 7.09 (t, *J* = 7.3 Hz, 2H), 5.46 (dt, *J* = 36.7, 7.4 Hz, 1H), 4.16 (s, 1H), 3.22 (dd, *J* = 7.4, 1.8 Hz, 2H), 2.81 – 2.06 (m, 8H).

**<sup>13</sup>C NMR** (126 MHz, CDCl<sub>3</sub>) δ 158.6 (d, *J*<sub>C-F</sub> = 249.9 Hz), 142.7, 132.1 (d, *J*<sub>C-F</sub> = 28.9 Hz), 128.9, 128.5, 128.4, 127.9, 126.9, 124.2 (d, *J*<sub>C-F</sub> = 7.1 Hz), 102.0 (d, *J*<sub>C-F</sub> = 15.1 Hz), 76.1, 53.2, 51.9 (d, *J*<sub>C-F</sub> = 4.6 Hz), 51.8.

**<sup>19</sup>F NMR** (471 MHz, CDCl<sub>3</sub>) δ -117.7 (d, *J* = 36.2 Hz).

**HRMS** (APCI) calcd for C<sub>26</sub>H<sub>28</sub>FN<sub>2</sub> [M+H]<sup>+</sup>: 387.2231, Found: 387.2212.

**(*Z*)-1-(Bis(4-fluorophenyl)methyl)-4-(3-fluoro-3-phenylallyl)piperazine (**98**)**

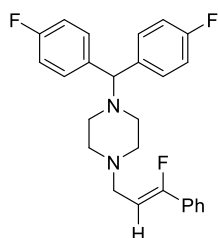

A solution of the (*Z*)-(3-bromo-1-fluoroprop-1-en-1-yl)benzene **96** (43 mg, 0.2 mmol, 1 equiv) in THF (0.5 M) was added dropwise to a solution of 4,4'-difluorobenzhydrylpiperazine (115 mg, 0.4 mmol, 2.0 equiv) in THF (2.5 M) at room temperature. 1 M aq NaOH (0.4 ml, 0.4 mmol, 2 equiv) was then added in one portion, and the reaction was stirred at room temperature for 6 h. The reaction was diluted with Et<sub>2</sub>O (10 ml). The organic layer was separated and the aqueous layer was extracted with Et<sub>2</sub>O (2 × 10 ml). The combined organics were washed with brine, dried (MgSO<sub>4</sub>) and concentrated in vacuo. The residue was purified by flash column chromatography (hexane/EtOAc = 1 : 1) to afford the product **98**. Pale yellow oil (73 mg, 86% yield, *Z/E* > 50 : 1).

**<sup>1</sup>H NMR** (500 MHz, CDCl<sub>3</sub>) δ 7.51 (d, *J* = 6.9 Hz, 2H), 7.34 (t, *J* = 6.8 Hz, 7H), 6.96 (t, *J* = 8.6 Hz, 4H), 5.53 (dt, *J* = 36.6, 7.3 Hz, 1H), 4.23 (s, 1H), 3.30 (d, *J* = 6.6 Hz, 2H), 2.87 – 2.51 (m, 4H), 2.51 – 2.13 (m, 4H).

**<sup>13</sup>C NMR** (126 MHz, CDCl<sub>3</sub>) δ 161.8 (d, *J*<sub>C-F</sub> = 245.5 Hz), 158.7 (d, *J*<sub>C-F</sub> = 250.1 Hz), 138.2 (d, *J*<sub>C-F</sub> = 3.1 Hz), 132.0 (d, *J*<sub>C-F</sub> = 28.9 Hz), 129.2 (d, *J*<sub>C-F</sub> = 7.8 Hz), 129.0, 128.5 (d, *J*<sub>C-F</sub> = 1.8 Hz), 124.2 (d, *J*<sub>C-F</sub> = 7.1 Hz), 115.4 (d, *J*<sub>C-F</sub> = 21.2 Hz), 101.8 (d, *J*<sub>C-F</sub> = 15.2 Hz), 74.4, 53.1, 51.8 (d, *J*<sub>C-F</sub> = 4.6 Hz), 51.6.

**<sup>19</sup>F NMR** (471 MHz, CDCl<sub>3</sub>) δ -115.7 (s, 2F), -117.5 (d, *J* = 35.3 Hz, 1F).

**HRMS** (ESI) calcd for C<sub>26</sub>H<sub>26</sub>F<sub>3</sub>N<sub>2</sub> [M+H]<sup>+</sup>: 423.2043, Found: 423.2023.

**(*Z*)-3-Fluoro-N-methyl-N-(naphthalen-1-ylmethyl)-3-phenylprop-2-en-1-amine (**99**)**

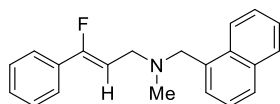

A solution of the (Z)-(3-bromo-1-fluoroprop-1-en-1-yl)benzene **96** (43 mg, 0.2 mmol, 1 equiv) in THF (0.5 M) was added dropwise to a solution of 1-methyl-aminomethyl naphthalene (68 mg, 0.4 mmol, 2.0 equiv) in THF (2.5 M) at room temperature. 1 M aq NaOH (0.4 ml, 0.4 mmol, 2 equiv) was then added in one portion, and the reaction was stirred at room temperature for 6 h. The reaction was diluted with Et<sub>2</sub>O (10 ml). The organic layer was separated and the aqueous layer was extracted with Et<sub>2</sub>O (2 × 10 ml). The combined organics were washed with brine, dried (MgSO<sub>4</sub>) and concentrated in vacuo. The residue was purified by flash column chromatography (hexane/EtOAc = 5 : 1) to afford the product **99** with spectral properties identical to the reported in the literature<sup>[20]</sup>. Pale yellow oil (48 mg, 79% yield, *Z/E* > 50 : 1).

**<sup>1</sup>H NMR** (500 MHz, CDCl<sub>3</sub>) δ 8.31 (d, *J* = 8.3 Hz, 1H), 7.82 (dd, *J* = 35.1, 8.0 Hz, 2H), 7.57 – 7.52 (m, 3H), 7.51 – 7.45 (m, 2H), 7.44 – 7.40 (m, 1H), 7.39 – 7.31 (m, 3H), 5.64 (dt, *J* = 37.1, 7.3 Hz, 1H), 3.99 (s, 2H), 3.43 (dd, *J* = 7.2, 1.6 Hz, 2H), 2.32 (s, 3H).

**<sup>13</sup>C NMR** (126 MHz, CDCl<sub>3</sub>) δ 158.4 (d, *J*<sub>C-F</sub> = 249.2 Hz), 134.7, 133.8, 132.5, 132.2 (d, *J*<sub>C-F</sub> = 28.9 Hz), 128.9, 128.46, 128.45, 128.0, 127.5, 125.9, 125.6, 125.1, 124.6, 124.2 (d, *J*<sub>C-F</sub> = 7.1 Hz), 103.0 (d, *J*<sub>C-F</sub> = 15.3 Hz), 60.0, 51.4 (d, *J*<sub>C-F</sub> = 4.4 Hz), 42.4.

**<sup>19</sup>F NMR** (471 MHz, CDCl<sub>3</sub>) δ -117.8 (d, *J* = 37.0 Hz).

#### (Z)-4-Bromo-2-fluoro-1-(2-fluoro-2-phenylvinyl)benzene (**100**)

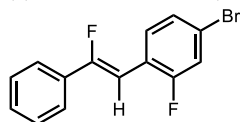

Prepared following the general procedure (**condition D**): 2,6-dichloropyridinium tetrafluoroborate (0.4 mmol, 94 mg, 2.0 equiv) dry DCE (2.0 mL), 4-bromo-2-fluoro-1-(phenylethynyl)benzene (0.2 mmol, 55 mg, 1.0 equiv) at 100 °C. The reaction mixture was quenched after 12 h, and the crude residue was purified by flash column chromatography (hexanes) to provide the title compound **100**. Pale yellow oil (28 mg, 47% yield, r.r. > 50 : 1, *Z/E* > 50 : 1).

**<sup>1</sup>H NMR** (500 MHz, CDCl<sub>3</sub>) δ 7.85 (t, *J* = 8.3 Hz, 1H), 7.70 – 7.61 (m, 2H), 7.46 – 7.36 (m, 3H), 7.32 – 7.28 (m, 1H), 7.26 (dd, *J* = 9.8, 1.8 Hz, 1H), 6.50 (d, *J* = 39.0 Hz, 1H).

**<sup>13</sup>C NMR** (126 MHz, CDCl<sub>3</sub>) δ 159.4 (dd, *J*<sub>C-F</sub> = 253.7, 1.0 Hz), 158.7 (dd, *J*<sub>C-F</sub> = 261.1, 2.3 Hz), 132.3 (d, *J*<sub>C-F</sub> = 27.5 Hz), 130.9 (dd, *J*<sub>C-F</sub> = 14.9, 3.1 Hz), 129.6, 128.7 (d, *J*<sub>C-F</sub> = 2.1 Hz), 127.6 (d, *J*<sub>C-F</sub> = 3.6 Hz), 124.5 (d, *J*<sub>C-F</sub> = 7.6 Hz), 120.9 (dd, *J*<sub>C-F</sub> = 10.0, 3.2 Hz), 120.8 (dd, *J*<sub>C-F</sub> = 11.9, 3.2 Hz), 118.9 (d, *J*<sub>C-F</sub> = 25.6 Hz), 96.2 (dd, *J*<sub>C-F</sub> = 9.4, 7.1 Hz).

**<sup>19</sup>F NMR** (471 MHz, CDCl<sub>3</sub>) δ -111.3 (dd, *J* = 39.0, 3.5 Hz, 1F), -113.9 – -114.1 (m, 1F).

**HRMS** (APCI) calcd for C<sub>14</sub>H<sub>9</sub>BrF<sub>2</sub> [M]<sup>+</sup>: 293.9850, Found: 293.9864.

## 9. X-ray structures of product 22

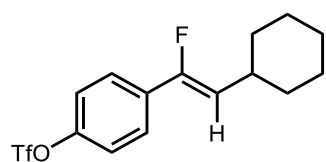

≡

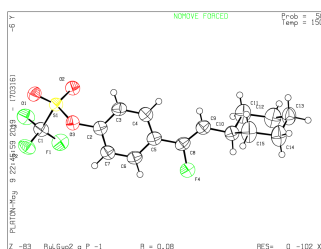

### Datablock: RuiGuo2\_a

Bond precision: C-C = 0.0077 Å

Wavelength=1.54178

Cell: a=5.6338(4) b=9.0435(7) c=16.2254(14)  
 alpha=74.325(6) beta=89.146(6) gamma=82.210(5)  
 Temperature: 150 K

|                        | Calculated      | Reported        |
|------------------------|-----------------|-----------------|
| Volume                 | 788.38(11)      | 788.38(11)      |
| Space group            | P -1            | P -1            |
| Hall group             | -P 1            | -P 1            |
| Moiety formula         | C15 H16 F4 O3 S | ?               |
| Sum formula            | C15 H16 F4 O3 S | C15 H16 F4 O3 S |
| Mr                     | 352.34          | 352.34          |
| Dx, g cm <sup>-3</sup> | 1.484           | 1.484           |
| Z                      | 2               | 2               |
| Mu (mm <sup>-1</sup> ) | 2.342           | 2.342           |
| F000                   | 364.0           | 364.0           |
| F000'                  | 366.06          |                 |
| h, k, lmax             | 6, 10, 19       | 6, 10, 19       |
| Nref                   | 2886            | 2770            |
| Tmin, Tmax             | 0.932, 0.988    | 0.650, 0.880    |
| Tmin'                  | 0.626           |                 |

Correction method= # Reported T Limits: Tmin=0.650 Tmax=0.880  
 AbsCorr = MULTI-SCAN

Data completeness= 0.960

Theta(max)= 68.331

R(reflections)= 0.0791( 1917)

wR2(reflections)= 0.2040( 2770)

S = 1.223

Npar= 212

## 10. Cartesian coordinates (Å) and energies of optimized structures

### 2,6-dichloropyridinium-tetrafluoroborate F

M06-2X SCF energy in solution: -1592.51622503 a.u.  
M06-2X enthalpy in solution: -1592.403628 a.u.  
M06-2X free energy in solution: -1592.460383 a.u.  
M06-2X free energy in solution after quasi-harmonic correction: -1592.456444 a.u.

#### Cartesian coordinates

| ATOM | X         | Y         | Z         |
|------|-----------|-----------|-----------|
| B    | 2.487699  | 0.129212  | 0.252608  |
| F    | 1.493814  | -0.045602 | 1.233381  |
| F    | 3.334145  | -0.970251 | 0.207487  |
| F    | 1.791677  | 0.230042  | -1.010268 |
| F    | 3.190017  | 1.307244  | 0.467682  |
| C    | -1.520308 | 1.091930  | -0.103642 |
| C    | -1.249743 | -1.244879 | -0.122188 |
| C    | -2.518176 | -1.432283 | 0.395625  |
| C    | -3.289382 | -0.302808 | 0.660825  |
| C    | -2.797156 | 0.977225  | 0.413716  |
| H    | -2.881153 | -2.435343 | 0.584860  |
| H    | -4.287998 | -0.421090 | 1.069025  |
| H    | -3.378836 | 1.867929  | 0.618481  |
| N    | -0.787377 | -0.005114 | -0.361583 |
| H    | 0.194316  | 0.106720  | -0.706423 |
| Cl   | -0.784128 | 2.594186  | -0.443721 |
| Cl   | -0.193016 | -2.532802 | -0.488542 |

#### 101

M06-2X SCF energy in solution: -539.37926831 a.u.



M06-2X enthalpy in solution: -539.173770 a.u.  
M06-2X free energy in solution: -539.224038 a.u.  
M06-2X free energy in solution after quasi-harmonic correction: -539.221504 a.u.

Cartesian coordinates

| ATOM | X         | Y         | Z         |
|------|-----------|-----------|-----------|
| C    | -2.040586 | 0.000084  | 0.000022  |
| C    | -2.748722 | 1.213047  | 0.000020  |
| C    | -2.748722 | -1.212879 | -0.000006 |
| C    | -4.140432 | 1.208276  | -0.000010 |
| H    | -2.200056 | 2.150201  | 0.000042  |
| C    | -4.140432 | -1.208108 | -0.000033 |
| H    | -2.200056 | -2.150034 | -0.000003 |
| C    | -4.839484 | 0.000084  | -0.000037 |
| H    | -4.680914 | 2.150316  | -0.000011 |
| H    | -4.680914 | -2.150148 | -0.000054 |
| H    | -5.925634 | 0.000084  | -0.000060 |
| C    | -0.606903 | 0.000083  | 0.000058  |
| C    | 0.606903  | -0.000083 | 0.000058  |
| C    | 2.040586  | -0.000084 | 0.000022  |
| C    | 2.748722  | 1.212879  | -0.000006 |
| C    | 2.748722  | -1.213047 | 0.000020  |
| C    | 4.140432  | 1.208108  | -0.000033 |
| H    | 2.200056  | 2.150034  | -0.000003 |
| C    | 4.140432  | -1.208276 | -0.000010 |
| H    | 2.200056  | -2.150201 | 0.000042  |
| C    | 4.839484  | -0.000084 | -0.000037 |
| H    | 4.680914  | 2.150148  | -0.000054 |
| H    | 4.680914  | -2.150316 | -0.000011 |
| H    | 5.925634  | -0.000084 | -0.000060 |

**TS-1**

M06-2X SCF energy in solution: -2131.87055224 a.u.  
M06-2X enthalpy in solution: -2131.557413 a.u.  
M06-2X free energy in solution: -2131.639127 a.u.  
M06-2X free energy in solution after quasi-harmonic correction: -2131.633758 a.u.  
Imaginary frequency: -993.3685 cm-1

## Cartesian coordinates

| ATOM | X         | Y         | Z         |
|------|-----------|-----------|-----------|
| C    | -1.532541 | -2.115855 | -0.016755 |
| C    | -2.198126 | -2.334267 | 1.210115  |
| C    | -2.196589 | -2.332192 | -1.244902 |
| C    | -3.512896 | -2.770210 | 1.200245  |
| H    | -1.673821 | -2.141177 | 2.140707  |
| C    | -3.511150 | -2.768639 | -1.237640 |
| H    | -1.670806 | -2.137634 | -2.174331 |
| C    | -4.165669 | -2.979712 | -0.019276 |
| H    | -4.039770 | -2.931906 | 2.134854  |
| H    | -4.036585 | -2.929231 | -2.173249 |
| H    | -5.200836 | -3.308835 | -0.020215 |
| C    | -0.204926 | -1.680022 | -0.015860 |
| C    | 0.957912  | -1.209016 | -0.016658 |
| B    | -2.382163 | 1.102267  | -0.009443 |
| F    | -3.659601 | 0.527631  | -0.019374 |
| F    | -1.663934 | 0.684970  | -1.148974 |
| F    | -2.478413 | 2.503368  | -0.013867 |
| F    | -1.684854 | 0.689476  | 1.144483  |
| C    | 0.731777  | 2.158340  | 1.172569  |
| C    | 0.739209  | 2.192094  | -1.122331 |

|    |          |           |           |
|----|----------|-----------|-----------|
| C  | 0.479405 | 3.553432  | -1.164534 |
| C  | 0.334436 | 4.212160  | 0.053528  |
| C  | 0.471359 | 3.517970  | 1.252549  |
| H  | 0.389206 | 4.068303  | -2.113522 |
| H  | 0.118494 | 5.275760  | 0.068436  |
| H  | 0.375051 | 4.005048  | 2.215496  |
| N  | 0.848776 | 1.514491  | 0.015806  |
| H  | 0.786221 | 0.060607  | -0.006863 |
| Cl | 0.975731 | 1.213012  | 2.600293  |
| Cl | 0.993019 | 1.287808  | -2.575244 |
| C  | 2.367483 | -1.613430 | -0.013466 |
| C  | 3.378938 | -0.651787 | -0.111538 |
| C  | 2.705315 | -2.971547 | 0.086929  |
| C  | 4.716089 | -1.044396 | -0.112281 |
| H  | 3.124185 | 0.401394  | -0.188593 |
| C  | 4.041495 | -3.355992 | 0.086555  |
| H  | 1.917564 | -3.715564 | 0.166465  |
| C  | 5.049682 | -2.394089 | -0.013734 |
| H  | 5.496031 | -0.292929 | -0.190342 |
| H  | 4.297470 | -4.408527 | 0.164505  |
| H  | 6.092231 | -2.698081 | -0.014113 |

**TS-1a**

M06-2X SCF energy in solution: -2131.86519752 a.u.  
M06-2X enthalpy in solution: -2131.552472 a.u.  
M06-2X free energy in solution: -2131.642231 a.u.  
M06-2X free energy in solution after quasi-harmonic correction: -2131.63056 a.u.  
Imaginary frequency: -892.0643 cm<sup>-1</sup>

Cartesian coordinates

| ATOM | X         | Y         | Z         |
|------|-----------|-----------|-----------|
| C    | 1.123860  | -1.560260 | 0.045977  |
| C    | 1.345068  | -2.230780 | 1.265563  |
| C    | 1.387896  | -2.193690 | -1.184427 |
| C    | 1.808387  | -3.537909 | 1.246268  |
| H    | 1.165105  | -1.709496 | 2.200726  |
| C    | 1.851532  | -3.501078 | -1.187707 |
| H    | 1.242482  | -1.643882 | -2.109116 |
| C    | 2.059457  | -4.167366 | 0.023339  |
| H    | 1.989644  | -4.064066 | 2.177860  |
| H    | 2.066592  | -3.998915 | -2.127633 |
| H    | 2.433145  | -5.187302 | 0.014514  |
| C    | 0.662128  | -0.230700 | 0.057083  |
| C    | 0.023221  | 0.839001  | 0.060703  |
| B    | 3.911111  | 0.248584  | -0.048835 |
| F    | 4.336287  | -1.086892 | -0.078427 |
| F    | 3.092520  | 0.509786  | -1.168896 |
| F    | 3.157382  | 0.480364  | 1.122140  |
| F    | 5.018720  | 1.107922  | -0.069252 |
| C    | -3.084184 | -0.707696 | 1.097975  |
| C    | -3.032975 | -0.605010 | -1.195717 |
| C    | -4.295402 | -1.168926 | -1.309678 |
| C    | -4.953498 | -1.505226 | -0.129341 |
| C    | -4.349967 | -1.275497 | 1.104573  |
| H    | -4.740203 | -1.333575 | -2.284091 |
| H    | -5.944008 | -1.947004 | -0.170588 |
| H    | -4.838676 | -1.524427 | 2.039191  |
| N    | -2.444279 | -0.382901 | -0.022790 |
| H    | -1.104692 | 0.192035  | 0.028985  |
| Cl   | -2.248894 | -0.377426 | 2.576204  |

|    |           |           |           |
|----|-----------|-----------|-----------|
| Cl | -2.135129 | -0.143363 | -2.600023 |
| C  | -0.041385 | 2.291920  | 0.072133  |
| C  | -1.279410 | 2.943998  | 0.115850  |
| C  | 1.148531  | 3.032436  | 0.038345  |
| C  | -1.328148 | 4.335499  | 0.127375  |
| H  | -2.198516 | 2.363422  | 0.140861  |
| C  | 1.088652  | 4.422222  | 0.049868  |
| H  | 2.100262  | 2.512141  | 0.002534  |
| C  | -0.145371 | 5.074562  | 0.094513  |
| H  | -2.288167 | 4.841532  | 0.162018  |
| H  | 2.009630  | 4.996738  | 0.023781  |
| H  | -0.184359 | 6.159976  | 0.103340  |

## 102

M06-2X SCF energy in solution: -964.41616323 a.u.  
M06-2X enthalpy in solution: -964.177906 a.u.  
M06-2X free energy in solution: -964.246903 a.u.  
M06-2X free energy in solution after quasi-harmonic correction: -964.2347879 a.u.

## Cartesian coordinates

| ATOM | X        | Y         | Z         |
|------|----------|-----------|-----------|
| C    | 0.869874 | -1.054748 | 0.025923  |
| C    | 1.465178 | -1.379205 | -1.230569 |
| C    | 1.432237 | -1.536403 | 1.246857  |
| C    | 2.583115 | -2.185075 | -1.253991 |
| H    | 1.031248 | -0.973074 | -2.138409 |
| C    | 2.552265 | -2.337260 | 1.198494  |
| H    | 0.972343 | -1.249241 | 2.187185  |
| C    | 3.119303 | -2.654232 | -0.045736 |
| H    | 3.058639 | -2.440150 | -2.194603 |

|   |           |           |           |
|---|-----------|-----------|-----------|
| H | 3.004175  | -2.709047 | 2.111379  |
| H | 4.008891  | -3.277568 | -0.072814 |
| C | -0.212005 | -0.229672 | 0.062640  |
| C | -1.230384 | 0.565282  | 0.090988  |
| B | 2.282216  | 1.885826  | -0.002658 |
| F | 3.229446  | 0.852947  | 0.084687  |
| F | 1.392770  | 1.795076  | 1.092940  |
| F | 2.918600  | 3.129745  | 0.006759  |
| F | 1.535447  | 1.735784  | -1.190594 |
| H | -0.947044 | 1.621759  | 0.164594  |
| C | -2.664780 | 0.219186  | 0.038004  |
| C | -3.104187 | -1.111077 | -0.012759 |
| C | -3.597066 | 1.261753  | 0.040525  |
| C | -4.465363 | -1.388374 | -0.062783 |
| H | -2.384304 | -1.926206 | -0.010755 |
| C | -4.960375 | 0.976978  | -0.010135 |
| H | -3.251632 | 2.291004  | 0.081006  |
| C | -5.395971 | -0.345805 | -0.061981 |
| H | -4.802844 | -2.419695 | -0.101754 |
| H | -5.679585 | 1.790443  | -0.008579 |
| H | -6.458381 | -0.567423 | -0.100945 |

#### 102a

M06-2X SCF energy in solution: -964.40841636 a.u.  
M06-2X enthalpy in solution: -964.170289 a.u.  
M06-2X free energy in solution: -964.238669 a.u.  
M06-2X free energy in solution after quasi-harmonic correction: -964.2324213 a.u.

#### Cartesian coordinates

| ATOM | X | Y | Z |
|------|---|---|---|
|------|---|---|---|

S82

|   |           |           |           |
|---|-----------|-----------|-----------|
| C | 1.478305  | -1.428117 | -0.197537 |
| C | 2.035789  | -1.881843 | 1.039504  |
| C | 2.273646  | -0.687091 | -1.126087 |
| C | 3.350140  | -1.592611 | 1.330074  |
| H | 1.405208  | -2.431783 | 1.731124  |
| C | 3.588960  | -0.417445 | -0.815897 |
| H | 1.819793  | -0.336883 | -2.046329 |
| C | 4.115072  | -0.862307 | 0.405661  |
| H | 3.792175  | -1.913897 | 2.266738  |
| H | 4.207586  | 0.154952  | -1.498042 |
| H | 5.148404  | -0.629429 | 0.647903  |
| C | 0.158235  | -1.637238 | -0.443671 |
| C | -1.095488 | -1.884721 | -0.645270 |
| B | 0.736519  | 2.048952  | -0.121072 |
| F | 1.895632  | 2.621236  | -0.666029 |
| F | -0.158830 | 3.047805  | 0.281013  |
| F | 0.121880  | 1.227579  | -1.091671 |
| F | 1.083953  | 1.254095  | 0.993110  |
| H | -1.288470 | -2.810495 | -1.199009 |
| C | -2.260152 | -1.084094 | -0.216385 |
| C | -3.531160 | -1.473008 | -0.653033 |
| C | -2.112861 | 0.032329  | 0.617394  |
| C | -4.651901 | -0.741754 | -0.265432 |
| H | -3.638204 | -2.341599 | -1.297320 |
| C | -3.235862 | 0.757641  | 0.998194  |
| H | -1.125608 | 0.335987  | 0.954761  |
| C | -4.505146 | 0.373672  | 0.558188  |
| H | -5.636963 | -1.043582 | -0.608517 |
| H | -3.117151 | 1.629271  | 1.634664  |
| H | -5.378535 | 0.945761  | 0.857355  |

**103**

M06-2X SCF energy in solution: -1167.45474965 a.u.  
M06-2X enthalpy in solution: -1167.377050 a.u.  
M06-2X free energy in solution: -1167.416368 a.u.  
M06-2X free energy in solution after quasi-harmonic correction: -1167.416368 a.u.

## Cartesian coordinates

| ATOM | X         | Y         | Z         |
|------|-----------|-----------|-----------|
| C    | -0.000107 | 0.007883  | 1.126557  |
| C    | -0.000107 | 0.007883  | -1.126557 |
| C    | 0.000225  | 1.396731  | -1.204520 |
| C    | 0.000384  | 2.093988  | 0.000000  |
| C    | 0.000225  | 1.396731  | 1.204520  |
| H    | 0.000382  | 1.903073  | -2.162426 |
| H    | 0.000656  | 3.179640  | 0.000000  |
| H    | 0.000382  | 1.903073  | 2.162426  |
| N    | -0.000215 | -0.683646 | 0.000000  |
| Cl   | -0.000107 | -0.929987 | 2.598735  |
| Cl   | -0.000107 | -0.929987 | -2.598735 |

**TS-2**

M06-2X SCF energy in solution: -964.40352766 a.u.  
M06-2X enthalpy in solution: -964.166138 a.u.  
M06-2X free energy in solution: -964.230824 a.u.  
M06-2X free energy in solution after quasi-harmonic correction: -964.226443 a.u.  
Imaginary frequency: -298.9906 cm-1

## Cartesian coordinates

| ATOM | X | Y | Z |
|------|---|---|---|
|------|---|---|---|



|   |           |           |           |
|---|-----------|-----------|-----------|
| C | 0.781630  | 0.881718  | -0.188517 |
| C | 1.171834  | 1.306299  | 1.102188  |
| C | 1.178676  | 1.599151  | -1.340710 |
| C | 1.934316  | 2.456137  | 1.231802  |
| H | 0.869345  | 0.725922  | 1.967745  |
| C | 1.949519  | 2.739012  | -1.193105 |
| H | 0.878038  | 1.241144  | -2.320612 |
| C | 2.323707  | 3.161232  | 0.088637  |
| H | 2.239940  | 2.799117  | 2.214615  |
| H | 2.266732  | 3.300345  | -2.065632 |
| H | 2.931999  | 4.054760  | 0.196733  |
| C | -0.011899 | -0.261181 | -0.319628 |
| C | -1.081828 | -1.004849 | -0.328497 |
| B | 2.476120  | -1.784826 | 0.126614  |
| F | 3.375219  | -0.769400 | -0.165824 |
| F | 1.333334  | -1.638444 | -0.788220 |
| F | 3.015654  | -3.038585 | -0.099135 |
| F | 1.972012  | -1.659898 | 1.417697  |
| H | -0.960552 | -2.072620 | -0.497195 |
| C | -2.456380 | -0.494592 | -0.129199 |
| C | -3.505332 | -1.415920 | -0.230995 |
| C | -2.739587 | 0.849185  | 0.152602  |
| C | -4.823577 | -0.999758 | -0.055917 |
| H | -3.283831 | -2.457519 | -0.447364 |
| C | -4.056871 | 1.258858  | 0.326594  |
| H | -1.934865 | 1.574421  | 0.239911  |
| C | -5.101650 | 0.337049  | 0.222760  |
| H | -5.630472 | -1.721899 | -0.136566 |
| H | -4.269746 | 2.300861  | 0.545815  |
| H | -6.128495 | 0.662499  | 0.360719  |

**TS-2a**

M06-2X SCF energy in solution: -964.40227439 a.u.  
M06-2X enthalpy in solution: -964.165129 a.u.  
M06-2X free energy in solution: -964.228789 a.u.  
M06-2X free energy in solution after quasi-harmonic correction: -964.2250332 a.u.  
Imaginary frequency: -292.5851 cm-1

## Cartesian coordinates

| ATOM | X         | Y         | Z         |
|------|-----------|-----------|-----------|
| C    | 1.712099  | -0.998451 | 0.056276  |
| C    | 2.392291  | -0.746661 | 1.267958  |
| C    | 2.424716  | -1.214180 | -1.144658 |
| C    | 3.778516  | -0.742189 | 1.275884  |
| H    | 1.820884  | -0.557336 | 2.170830  |
| C    | 3.808272  | -1.197686 | -1.121002 |
| H    | 1.876399  | -1.379196 | -2.067063 |
| C    | 4.478123  | -0.961887 | 0.085813  |
| H    | 4.317001  | -0.553958 | 2.198682  |
| H    | 4.371522  | -1.358621 | -2.034142 |
| H    | 5.564321  | -0.944501 | 0.096004  |
| C    | 0.311570  | -1.006421 | 0.046051  |
| C    | -0.879740 | -1.483084 | 0.244170  |
| B    | 0.598209  | 1.935971  | -0.178101 |
| F    | -0.024945 | 0.772315  | -0.815334 |
| F    | 1.918346  | 1.994878  | -0.599582 |
| F    | -0.123748 | 3.051378  | -0.567077 |
| F    | 0.515525  | 1.726623  | 1.199247  |
| H    | -0.780189 | -2.536038 | 0.541233  |
| C    | -2.250681 | -0.950152 | 0.147460  |

|   |           |           |           |
|---|-----------|-----------|-----------|
| C | -2.564010 | 0.378318  | 0.458797  |
| C | -3.267954 | -1.839470 | -0.221545 |
| C | -3.884092 | 0.811912  | 0.373011  |
| H | -1.786159 | 1.060601  | 0.780987  |
| C | -4.583988 | -1.395279 | -0.317019 |
| H | -3.023892 | -2.875501 | -0.441874 |
| C | -4.893248 | -0.067655 | -0.021465 |
| H | -4.122542 | 1.842688  | 0.617193  |
| H | -5.366123 | -2.086882 | -0.615280 |
| H | -5.920118 | 0.279451  | -0.089737 |

**E-81**

M06-2X SCF energy in solution: -639.85885185 a.u.  
M06-2X enthalpy in solution: -639.637084 a.u.  
M06-2X free energy in solution: -639.689604 a.u.  
M06-2X free energy in solution after quasi-harmonic correction: -639.6874278 a.u.

Cartesian coordinates

| ATOM | X         | Y         | Z         |
|------|-----------|-----------|-----------|
| C    | -1.535580 | 0.403490  | -0.099976 |
| C    | -1.183347 | -0.686935 | -0.906020 |
| C    | -2.739908 | 0.373415  | 0.614401  |
| C    | -2.013365 | -1.802157 | -0.973266 |
| H    | -0.264636 | -0.655223 | -1.484799 |
| C    | -3.567119 | -0.745736 | 0.544972  |
| H    | -3.023047 | 1.223768  | 1.228000  |
| C    | -3.204045 | -1.836648 | -0.244682 |
| H    | -1.735263 | -2.641970 | -1.603299 |
| H    | -4.495739 | -0.764446 | 1.107859  |
| H    | -3.850289 | -2.707986 | -0.299509 |

|   |           |           |           |
|---|-----------|-----------|-----------|
| C | -0.671683 | 1.595066  | -0.021181 |
| C | 0.657490  | 1.727658  | 0.002226  |
| F | -1.402725 | 2.748116  | 0.012455  |
| H | 1.037153  | 2.747046  | -0.039612 |
| C | 1.658269  | 0.646449  | 0.092359  |
| C | 1.479199  | -0.472682 | 0.919214  |
| C | 2.853893  | 0.762791  | -0.630422 |
| C | 2.455877  | -1.462294 | 0.992828  |
| H | 0.574323  | -0.561531 | 1.514459  |
| C | 3.831200  | -0.228584 | -0.557507 |
| H | 3.012630  | 1.635788  | -1.259136 |
| C | 3.633254  | -1.347702 | 0.250822  |
| H | 2.301360  | -2.321438 | 1.639576  |
| H | 4.748405  | -0.124005 | -1.130216 |
| H | 4.394812  | -2.119838 | 0.311974  |

#### Z-71

M06-2X SCF energy in solution: -639.86258720 a.u.  
M06-2X enthalpy in solution: -639.640351 a.u.  
M06-2X free energy in solution: -639.694215 a.u.  
M06-2X free energy in solution after quasi-harmonic correction: -639.6907399 a.u.

#### Cartesian coordinates

| ATOM | X         | Y         | Z         |
|------|-----------|-----------|-----------|
| C    | -1.943555 | -0.076036 | -0.023333 |
| C    | -2.846005 | -1.113410 | 0.249923  |
| C    | -2.442233 | 1.210332  | -0.281575 |
| C    | -4.216762 | -0.864521 | 0.282062  |
| H    | -2.474406 | -2.114207 | 0.443527  |
| C    | -3.811003 | 1.453246  | -0.245017 |

|   |           |           |           |
|---|-----------|-----------|-----------|
| H | -1.764488 | 2.021334  | -0.530564 |
| C | -4.704649 | 0.418062  | 0.038618  |
| H | -4.903311 | -1.677669 | 0.499079  |
| H | -4.182678 | 2.452953  | -0.450194 |
| H | -5.773203 | 0.610778  | 0.061982  |
| C | -0.499371 | -0.355748 | -0.035126 |
| C | 0.513423  | 0.517344  | 0.041938  |
| F | -0.231310 | -1.684999 | -0.112165 |
| H | 0.222964  | 1.558359  | 0.149014  |
| C | 1.959902  | 0.271347  | 0.023037  |
| C | 2.558255  | -0.984935 | -0.186329 |
| C | 2.801702  | 1.380387  | 0.221841  |
| C | 3.945134  | -1.114290 | -0.190038 |
| H | 1.946315  | -1.862968 | -0.351026 |
| C | 4.186807  | 1.247158  | 0.219377  |
| H | 2.355459  | 2.359190  | 0.380789  |
| C | 4.766514  | -0.004829 | 0.013650  |
| H | 4.386793  | -2.093171 | -0.354760 |
| H | 4.812392  | 2.121109  | 0.377393  |
| H | 5.847003  | -0.115349 | 0.010075  |

### BF3

M06-2X SCF energy in solution: -324.56269572 a.u.  
M06-2X enthalpy in solution: -324.546035 a.u.  
M06-2X free energy in solution: -324.576705 a.u.  
M06-2X free energy in solution after quasi-harmonic correction: -324.5767052 a.u.

### Cartesian coordinates

| ATOM | X         | Y        | Z         |
|------|-----------|----------|-----------|
| B    | -0.000001 | 0.000130 | -0.000102 |

|   |           |           |          |
|---|-----------|-----------|----------|
| F | -1.150308 | 0.643185  | 0.000019 |
| F | 1.132233  | 0.674490  | 0.000019 |
| F | 0.018076  | -1.317747 | 0.000019 |

### TS-1b

M06-2X SCF energy in solution: -2131.86614792 a.u.  
M06-2X enthalpy in solution: -2131.552661 a.u.  
M06-2X free energy in solution: -2131.639469 a.u.  
M06-2X free energy in solution after quasi-harmonic correction: -2131.630094 a.u.  
Imaginary frequency: -202.0959 cm-1

### Cartesian coordinates

| ATOM | X         | Y         | Z         |
|------|-----------|-----------|-----------|
| C    | -3.724356 | 0.200553  | 0.100745  |
| C    | -4.425915 | -0.183080 | -1.067397 |
| C    | -4.277210 | -0.029735 | 1.383520  |
| C    | -5.663200 | -0.792903 | -0.944519 |
| H    | -3.981950 | 0.005316  | -2.040251 |
| C    | -5.515933 | -0.640137 | 1.487490  |
| H    | -3.720032 | 0.272979  | 2.264995  |
| C    | -6.201828 | -1.018494 | 0.327537  |
| H    | -6.212563 | -1.095081 | -1.829937 |
| H    | -5.952523 | -0.825406 | 2.463302  |
| H    | -7.172621 | -1.497603 | 0.416748  |
| C    | -2.474886 | 0.810204  | -0.010714 |
| C    | -1.274679 | 1.179146  | -0.094706 |
| B    | 3.958708  | -0.255703 | -0.019658 |
| F    | 2.925417  | -0.408662 | -0.968858 |
| F    | 3.400730  | 0.201404  | 1.187848  |
| F    | 4.588252  | -1.495056 | 0.189270  |

|    |           |           |           |
|----|-----------|-----------|-----------|
| F  | 4.892890  | 0.678445  | -0.492047 |
| C  | 0.398775  | -1.972067 | -1.021661 |
| C  | 0.860373  | -1.454351 | 1.152568  |
| C  | 1.809590  | -2.458923 | 1.258098  |
| C  | 2.025609  | -3.249054 | 0.133247  |
| C  | 1.305654  | -3.019831 | -1.036093 |
| H  | 2.369285  | -2.596012 | 2.175423  |
| H  | 2.770972  | -4.037239 | 0.163826  |
| H  | 1.458824  | -3.608177 | -1.932673 |
| N  | 0.171238  | -1.214000 | 0.042891  |
| H  | -0.739550 | 0.079232  | -0.045525 |
| Cl | -0.516838 | -1.575087 | -2.444943 |
| Cl | 0.498507  | -0.431193 | 2.505729  |
| C  | -0.378631 | 2.329117  | -0.199312 |
| C  | 1.003643  | 2.122671  | -0.251904 |
| C  | -0.905537 | 3.628675  | -0.238692 |
| C  | 1.859798  | 3.217985  | -0.344773 |
| H  | 1.416664  | 1.117697  | -0.228970 |
| C  | -0.042996 | 4.714483  | -0.331349 |
| H  | -1.980867 | 3.777057  | -0.196389 |
| C  | 1.339170  | 4.510502  | -0.383816 |
| H  | 2.932094  | 3.052384  | -0.384572 |
| H  | -0.447484 | 5.721866  | -0.361862 |
| H  | 2.008934  | 5.362531  | -0.454961 |

**TS-1c**

|                                                                 |                     |
|-----------------------------------------------------------------|---------------------|
| M06-2X SCF energy in solution:                                  | -2131.86454140 a.u. |
| M06-2X enthalpy in solution:                                    | -2131.551715 a.u.   |
| M06-2X free energy in solution:                                 | -2131.640038 a.u.   |
| M06-2X free energy in solution after quasi-harmonic correction: | -2131.629656 a.u.   |

Imaginary frequency: -636.7487 cm-1

Cartesian coordinates

| ATOM | X         | Y         | Z         |
|------|-----------|-----------|-----------|
| C    | 0.873374  | -1.821826 | -0.650960 |
| C    | 1.343452  | -2.414239 | 0.538662  |
| C    | 0.668886  | -2.594885 | -1.812600 |
| C    | 1.593917  | -3.779017 | 0.560073  |
| H    | 1.519424  | -1.790928 | 1.409402  |
| C    | 0.921819  | -3.957854 | -1.773294 |
| H    | 0.321610  | -2.112206 | -2.721043 |
| C    | 1.383077  | -4.544232 | -0.590158 |
| H    | 1.965527  | -4.246639 | 1.465991  |
| H    | 0.770239  | -4.564740 | -2.660059 |
| H    | 1.587973  | -5.610826 | -0.567502 |
| C    | 0.610115  | -0.438942 | -0.680865 |
| C    | 0.130394  | 0.711014  | -0.644915 |
| B    | 3.739834  | 0.081124  | 0.631857  |
| F    | 4.330637  | -1.143129 | 0.975408  |
| F    | 3.289686  | 0.026962  | -0.707202 |
| F    | 2.635112  | 0.323578  | 1.472484  |
| F    | 4.668867  | 1.122560  | 0.764131  |
| C    | -2.553426 | -0.012731 | 1.609912  |
| C    | -3.326285 | -0.534418 | -0.485064 |
| C    | -4.583973 | -0.871667 | -0.007291 |
| C    | -4.795035 | -0.758636 | 1.364861  |
| C    | -3.770465 | -0.323838 | 2.200875  |
| H    | -5.360383 | -1.208095 | -0.683957 |
| H    | -5.763398 | -1.011691 | 1.784729  |
| H    | -3.903673 | -0.226999 | 3.271777  |



|    |           |           |           |
|----|-----------|-----------|-----------|
| N  | -2.338737 | -0.115385 | 0.300596  |
| H  | -0.994506 | 0.235859  | -0.263196 |
| Cl | -1.218676 | 0.536098  | 2.561948  |
| Cl | -2.960512 | -0.645478 | -2.174600 |
| C  | 0.227579  | 2.160182  | -0.731545 |
| C  | -0.934618 | 2.931140  | -0.856672 |
| C  | 1.485223  | 2.776173  | -0.676178 |
| C  | -0.838718 | 4.317668  | -0.936351 |
| H  | -1.906448 | 2.446038  | -0.897916 |
| C  | 1.568920  | 4.162849  | -0.754768 |
| H  | 2.376392  | 2.166463  | -0.570723 |
| C  | 0.412067  | 4.933774  | -0.884914 |
| H  | -1.739582 | 4.915463  | -1.036908 |
| H  | 2.542585  | 4.641280  | -0.710662 |
| H  | 0.485926  | 6.015731  | -0.944532 |

#### 104

M06-2X SCF energy in solution: -2131.87748267 a.u.  
M06-2X enthalpy in solution: -2131.559682 a.u.  
M06-2X free energy in solution: -2131.649353 a.u.  
M06-2X free energy in solution after quasi-harmonic correction: -2131.638942 a.u.

#### Cartesian coordinates

| ATOM | X        | Y         | Z         |
|------|----------|-----------|-----------|
| C    | 2.744147 | 0.306918  | -0.069280 |
| C    | 3.294321 | -0.057903 | 1.194608  |
| C    | 3.437273 | 0.010769  | -1.279548 |
| C    | 4.522159 | -0.684612 | 1.235982  |
| H    | 2.727686 | 0.154329  | 2.095690  |
| C    | 4.661844 | -0.619695 | -1.214497 |

|    |           |           |           |
|----|-----------|-----------|-----------|
| H  | 2.978342  | 0.275228  | -2.227046 |
| C  | 5.194284  | -0.962927 | 0.037133  |
| H  | 4.958940  | -0.977412 | 2.184409  |
| H  | 5.204556  | -0.863710 | -2.121178 |
| H  | 6.155115  | -1.468520 | 0.078350  |
| C  | 1.515198  | 0.898358  | -0.120489 |
| C  | 0.336204  | 1.415802  | -0.156497 |
| B  | 0.765807  | -2.308978 | -0.080416 |
| F  | 2.126852  | -2.654944 | -0.141328 |
| F  | 0.435107  | -1.510674 | -1.196183 |
| F  | -0.020038 | -3.466881 | -0.074054 |
| F  | 0.525986  | -1.558019 | 1.089011  |
| C  | -2.373800 | -0.928543 | 1.237836  |
| C  | -2.635012 | -1.208355 | -0.987526 |
| C  | -3.117878 | -2.502885 | -0.845609 |
| C  | -3.213774 | -2.998652 | 0.451781  |
| C  | -2.837933 | -2.204927 | 1.531173  |
| H  | -3.392246 | -3.094556 | -1.710713 |
| H  | -3.573064 | -4.009014 | 0.620464  |
| H  | -2.890676 | -2.559045 | 2.553713  |
| N  | -2.271677 | -0.429262 | 0.017865  |
| H  | -0.456363 | 0.648390  | -0.220702 |
| Cl | -1.889228 | 0.134601  | 2.533614  |
| Cl | -2.496351 | -0.507429 | -2.578590 |
| C  | -0.078254 | 2.830793  | -0.117821 |
| C  | 0.853830  | 3.873020  | -0.023987 |
| C  | -1.445938 | 3.117321  | -0.177175 |
| C  | 0.414657  | 5.191533  | 0.008484  |
| H  | 1.917129  | 3.650401  | 0.023806  |
| C  | -1.879168 | 4.441713  | -0.144318 |

|   |           |          |           |
|---|-----------|----------|-----------|
| H | -2.159877 | 2.300587 | -0.246201 |
| C | -0.951975 | 5.478387 | -0.051946 |
| H | 1.138071  | 5.998212 | 0.081182  |
| H | -2.941651 | 4.660985 | -0.190681 |
| H | -1.290683 | 6.509908 | -0.026305 |

#### 104a

M06-2X SCF energy in solution: -2131.87108908 a.u.  
M06-2X enthalpy in solution: -2131.553028 a.u.  
M06-2X free energy in solution: -2131.645117 a.u.  
M06-2X free energy in solution after quasi-harmonic correction: -2131.632398 a.u.

#### Cartesian coordinates

| ATOM | X         | Y         | Z         |
|------|-----------|-----------|-----------|
| C    | 1.661303  | -1.458025 | 0.291382  |
| C    | 2.131365  | -1.873821 | 1.571205  |
| C    | 2.008164  | -2.187866 | -0.883454 |
| C    | 2.905924  | -3.010705 | 1.664852  |
| H    | 1.872466  | -1.284043 | 2.444720  |
| C    | 2.777434  | -3.326130 | -0.765529 |
| H    | 1.657830  | -1.830163 | -1.846507 |
| C    | 3.221764  | -3.728074 | 0.501919  |
| H    | 3.278400  | -3.344660 | 2.627031  |
| H    | 3.052495  | -3.897688 | -1.645191 |
| H    | 3.837093  | -4.619756 | 0.585086  |
| C    | 0.856711  | -0.358851 | 0.183869  |
| C    | -0.041240 | 0.559920  | 0.077666  |
| B    | 4.233708  | 0.474692  | -0.107926 |
| F    | 4.675977  | -0.855471 | -0.063914 |
| F    | 3.602287  | 0.797284  | 1.114195  |

|    |           |           |           |
|----|-----------|-----------|-----------|
| F  | 5.314496  | 1.337908  | -0.320805 |
| F  | 3.294646  | 0.622177  | -1.152220 |
| C  | -3.978964 | -0.308873 | 1.022932  |
| C  | -3.567107 | -1.160612 | -1.030068 |
| C  | -4.881805 | -1.576494 | -1.205498 |
| C  | -5.767888 | -1.315898 | -0.163443 |
| C  | -5.321834 | -0.667120 | 0.985013  |
| H  | -5.191873 | -2.078854 | -2.114176 |
| H  | -6.807037 | -1.618659 | -0.246551 |
| H  | -5.982403 | -0.447130 | 1.815394  |
| N  | -3.114345 | -0.543593 | 0.049024  |
| H  | -1.049702 | 0.106087  | 0.147984  |
| Cl | -3.338181 | 0.507819  | 2.423199  |
| Cl | -2.394311 | -1.444930 | -2.289291 |
| C  | 0.003403  | 2.018381  | -0.123595 |
| C  | 1.195431  | 2.747747  | -0.036072 |
| C  | -1.203401 | 2.670600  | -0.404650 |
| C  | 1.170791  | 4.124336  | -0.236923 |
| H  | 2.126378  | 2.238928  | 0.190004  |
| C  | -1.217938 | 4.048225  | -0.607331 |
| H  | -2.123816 | 2.094450  | -0.465410 |
| C  | -0.030825 | 4.775819  | -0.524023 |
| H  | 2.095555  | 4.689420  | -0.168904 |
| H  | -2.154546 | 4.551563  | -0.827909 |
| H  | -0.040999 | 5.850644  | -0.680348 |

**TS-2b**

M06-2X SCF energy in solution: -2131.86995998 a.u.

M06-2X enthalpy in solution: -2131.552879 a.u.

M06-2X free energy in solution: -2131.639721 a.u.

M06-2X free energy in solution after quasi-harmonic correction: -2131.630141 a.u.

Imaginary frequency: -286.3257 cm-1

Cartesian coordinates

| ATOM | X         | Y         | Z         |
|------|-----------|-----------|-----------|
| C    | 0.871012  | 1.932124  | 0.051591  |
| C    | 1.166765  | 3.003822  | -0.820408 |
| C    | 0.675614  | 2.155349  | 1.433573  |
| C    | 1.277529  | 4.284555  | -0.303122 |
| H    | 1.297986  | 2.807879  | -1.879564 |
| C    | 0.786163  | 3.441302  | 1.933922  |
| H    | 0.445021  | 1.314119  | 2.080416  |
| C    | 1.082392  | 4.498306  | 1.065213  |
| H    | 1.504790  | 5.118837  | -0.958313 |
| H    | 0.640403  | 3.630628  | 2.992249  |
| H    | 1.162074  | 5.506276  | 1.462405  |
| C    | 0.771497  | 0.631446  | -0.453836 |
| C    | 1.141211  | -0.564590 | -0.812697 |
| B    | -1.956042 | 1.547313  | -1.327322 |
| F    | -2.118035 | 2.487234  | -0.316934 |
| F    | -1.168479 | 0.438677  | -0.773143 |
| F    | -3.167904 | 1.016792  | -1.736069 |
| F    | -1.231000 | 2.065979  | -2.394213 |
| C    | -2.485428 | -2.061762 | 0.032986  |
| C    | -1.115083 | -1.454767 | 1.711391  |
| C    | -2.017877 | -0.528621 | 2.219445  |
| C    | -3.232506 | -0.402302 | 1.549271  |
| C    | -3.489855 | -1.186233 | 0.430311  |
| H    | -1.781750 | 0.061341  | 3.097635  |
| H    | -3.972988 | 0.312248  | 1.894856  |

|    |           |           |           |
|----|-----------|-----------|-----------|
| H  | -4.415097 | -1.108330 | -0.127352 |
| N  | -1.324057 | -2.209493 | 0.646685  |
| H  | 0.380221  | -1.260822 | -1.160244 |
| Cl | -2.723183 | -3.042071 | -1.391314 |
| Cl | 0.427170  | -1.674613 | 2.508610  |
| C  | 2.537382  | -1.047325 | -0.721926 |
| C  | 3.636518  | -0.180499 | -0.673762 |
| C  | 2.739373  | -2.431989 | -0.683171 |
| C  | 4.923713  | -0.699399 | -0.573366 |
| H  | 3.488843  | 0.894994  | -0.730918 |
| C  | 4.030369  | -2.944936 | -0.580233 |
| H  | 1.882931  | -3.100157 | -0.725301 |
| C  | 5.123301  | -2.080579 | -0.523397 |
| H  | 5.773752  | -0.024311 | -0.541768 |
| H  | 4.180850  | -4.019821 | -0.547777 |
| H  | 6.130030  | -2.480894 | -0.448023 |

#### TS-2c

M06-2X SCF energy in solution: -2131.86989076 a.u.  
M06-2X enthalpy in solution: -2131.553127 a.u.  
M06-2X free energy in solution: -2131.640090 a.u.  
M06-2X free energy in solution after quasi-harmonic correction: -2131.630167 a.u.  
Imaginary frequency: -285.2250 cm<sup>-1</sup>

#### Cartesian coordinates

| ATOM | X         | Y        | Z         |
|------|-----------|----------|-----------|
| C    | -0.568602 | 1.175429 | 0.307291  |
| C    | -1.161784 | 1.442510 | -0.945304 |
| C    | -1.064264 | 1.772048 | 1.487373  |
| C    | -2.259056 | 2.288716 | -1.006475 |

|    |           |           |           |
|----|-----------|-----------|-----------|
| H  | -0.745633 | 0.987297  | -1.839137 |
| C  | -2.158391 | 2.617332  | 1.408463  |
| H  | -0.575841 | 1.564539  | 2.434612  |
| C  | -2.748267 | 2.873807  | 0.164817  |
| H  | -2.728647 | 2.502177  | -1.961379 |
| H  | -2.551245 | 3.085708  | 2.304910  |
| H  | -3.600776 | 3.545189  | 0.109278  |
| C  | 0.535590  | 0.310690  | 0.370158  |
| C  | 1.146519  | -0.832698 | 0.374350  |
| B  | 2.095035  | 2.701262  | -0.406134 |
| F  | 1.995760  | 1.656158  | 0.616367  |
| F  | 1.178228  | 3.693105  | -0.090141 |
| F  | 3.397844  | 3.170134  | -0.387311 |
| F  | 1.786937  | 2.096210  | -1.625107 |
| C  | -2.806100 | -1.285213 | 0.887963  |
| C  | -2.254426 | -1.822239 | -1.233530 |
| C  | -3.398432 | -1.233196 | -1.762126 |
| C  | -4.271849 | -0.635090 | -0.858450 |
| C  | -3.980718 | -0.648026 | 0.503248  |
| H  | -3.588421 | -1.238883 | -2.829030 |
| H  | -5.176546 | -0.152467 | -1.215507 |
| H  | -4.633291 | -0.188459 | 1.236513  |
| N  | -1.954401 | -1.860175 | 0.054140  |
| H  | 0.365319  | -1.609648 | 0.419476  |
| Cl | -2.379946 | -1.354561 | 2.577797  |
| Cl | -1.092718 | -2.558916 | -2.305351 |
| C  | 2.546537  | -1.287203 | 0.347141  |
| C  | 2.844215  | -2.499579 | 0.982488  |
| C  | 3.554950  | -0.584084 | -0.323118 |
| C  | 4.148625  | -2.986106 | 0.983787  |

|   |          |           |           |
|---|----------|-----------|-----------|
| H | 2.052336 | -3.052631 | 1.480974  |
| C | 4.854353 | -1.083485 | -0.327856 |
| H | 3.322501 | 0.333931  | -0.849586 |
| C | 5.156204 | -2.276799 | 0.330072  |
| H | 4.375071 | -3.920557 | 1.488457  |
| H | 5.633067 | -0.536170 | -0.850503 |
| H | 6.173480 | -2.657342 | 0.325014  |

### 105

M06-2X SCF energy in solution: -542.99356576 a.u.  
M06-2X enthalpy in solution: -542.716477 a.u.  
M06-2X free energy in solution: -542.770712 a.u.  
M06-2X free energy in solution after quasi-harmonic correction: -542.7671996 a.u.

### Cartesian coordinates

| ATOM | X         | Y         | Z         |
|------|-----------|-----------|-----------|
| C    | -0.388307 | -0.281549 | -0.282741 |
| C    | 0.815604  | -0.175611 | -0.179298 |
| C    | 2.243893  | -0.058579 | -0.063999 |
| C    | 2.814938  | 1.031509  | 0.611840  |
| C    | 3.083277  | -1.033746 | -0.626065 |
| C    | 4.198550  | 1.141001  | 0.721320  |
| H    | 2.166622  | 1.786420  | 1.047013  |
| C    | 4.465978  | -0.917591 | -0.512623 |
| H    | 2.642665  | -1.877586 | -1.148877 |
| C    | 5.027575  | 0.168384  | 0.160476  |
| H    | 4.630525  | 1.988303  | 1.246056  |
| H    | 5.106624  | -1.677370 | -0.951012 |
| H    | 6.106621  | 0.256522  | 0.247627  |
| C    | -1.848687 | -0.384011 | -0.380431 |

S100



|   |           |           |           |
|---|-----------|-----------|-----------|
| C | -2.465194 | -0.837442 | 0.957689  |
| C | -2.470589 | 0.950015  | -0.837386 |
| H | -2.085469 | -1.146042 | -1.137970 |
| C | -3.987582 | -0.943497 | 0.849541  |
| H | -2.197585 | -0.103761 | 1.730807  |
| H | -2.029727 | -1.797126 | 1.257250  |
| C | -3.992975 | 0.837104  | -0.938204 |
| H | -2.203045 | 1.726979  | -0.107684 |
| H | -2.039090 | 1.246899  | -1.799696 |
| C | -4.606420 | 0.377339  | 0.386338  |
| H | -4.406513 | -1.243642 | 1.817004  |
| H | -4.244241 | -1.735838 | 0.131523  |
| H | -4.415681 | 1.802127  | -1.240887 |
| H | -4.250020 | 0.115244  | -1.726922 |
| H | -5.692960 | 0.272391  | 0.285098  |
| H | -4.429094 | 1.146522  | 1.151932  |

#### 106

M06-2X SCF energy in solution: -968.02975983 a.u.  
M06-2X enthalpy in solution: -967.719948 a.u.  
M06-2X free energy in solution: -967.791208 a.u.  
M06-2X free energy in solution after quasi-harmonic correction: -967.7847027 a.u.

#### Cartesian coordinates

| ATOM | X         | Y         | Z         |
|------|-----------|-----------|-----------|
| C    | -1.171873 | -1.109432 | 0.003127  |
| C    | -1.795030 | -1.301123 | 1.269409  |
| C    | -1.753179 | -1.641921 | -1.183242 |
| C    | -2.964401 | -2.030448 | 1.338988  |
| H    | -1.343516 | -0.858802 | 2.151309  |

S101

|   |           |           |           |
|---|-----------|-----------|-----------|
| C | -2.926692 | -2.360680 | -1.092045 |
| H | -1.268324 | -1.457801 | -2.136913 |
| C | -3.523707 | -2.549437 | 0.163219  |
| H | -3.459823 | -2.185420 | 2.291148  |
| H | -3.393752 | -2.767427 | -1.982254 |
| H | -4.452755 | -3.109421 | 0.224580  |
| C | -0.031335 | -0.357966 | -0.080295 |
| C | 1.058878  | 0.317199  | -0.142442 |
| B | -2.323901 | 1.965338  | -0.077933 |
| F | -3.376354 | 1.042369  | -0.182710 |
| F | -1.411448 | 1.748703  | -1.136950 |
| F | -2.815908 | 3.272225  | -0.138915 |
| F | -1.643435 | 1.765535  | 1.141298  |
| C | 2.451458  | -0.279877 | -0.000541 |
| C | 3.243787  | -0.032310 | -1.292267 |
| C | 3.152294  | 0.351534  | 1.211165  |
| H | 2.360075  | -1.361400 | 0.162351  |
| C | 4.676136  | -0.555501 | -1.153739 |
| H | 3.263011  | 1.048462  | -1.492664 |
| H | 2.736847  | -0.510080 | -2.138171 |
| C | 4.584962  | -0.173846 | 1.337878  |
| H | 3.168946  | 1.442827  | 1.080079  |
| H | 2.580790  | 0.143318  | 2.122610  |
| C | 5.380538  | 0.067527  | 0.053352  |
| H | 5.232176  | -0.344667 | -2.074140 |
| H | 4.652978  | -1.648376 | -1.037551 |
| H | 5.076206  | 0.308010  | 2.190632  |
| H | 4.557873  | -1.251764 | 1.552073  |
| H | 6.392793  | -0.340548 | 0.152951  |
| H | 5.485876  | 1.149757  | -0.108605 |

H 0.963409 1.394842 -0.307685

**106a**

M06-2X SCF energy in solution: -968.03079736 a.u.

M06-2X enthalpy in solution: -967.720899 a.u.

M06-2X free energy in solution: -967.793033 a.u.

M06-2X free energy in solution after quasi-harmonic correction: -967.785393 a.u.

Cartesian coordinates

| ATOM | X         | Y         | Z         |
|------|-----------|-----------|-----------|
| C    | 1.800695  | -1.186699 | 0.001977  |
| C    | 2.490618  | -1.054081 | 1.240664  |
| C    | 2.494912  | -1.061099 | -1.235039 |
| C    | 3.850570  | -0.822923 | 1.231078  |
| H    | 1.930123  | -1.128526 | 2.166992  |
| C    | 3.854763  | -0.829614 | -1.222038 |
| H    | 1.937600  | -1.140809 | -2.162846 |
| C    | 4.522136  | -0.710353 | 0.005363  |
| H    | 4.396022  | -0.713003 | 2.161925  |
| H    | 4.403409  | -0.724764 | -2.151594 |
| H    | 5.591354  | -0.517208 | 0.006657  |
| C    | 0.451049  | -1.413499 | 0.000348  |
| C    | -0.803941 | -1.685638 | -0.000226 |
| B    | 0.798636  | 1.898808  | -0.007144 |
| F    | 2.200922  | 1.892130  | 0.000482  |
| F    | 0.317717  | 3.211897  | -0.013933 |
| F    | 0.333750  | 1.215828  | -1.154121 |
| F    | 0.321384  | 1.223015  | 1.138957  |
| H    | -1.061603 | -2.751243 | 0.003936  |
| C    | -1.952958 | -0.687460 | -0.003996 |

|   |           |           |           |
|---|-----------|-----------|-----------|
| C | -2.803731 | -0.896524 | -1.263693 |
| C | -2.786288 | -0.868856 | 1.271658  |
| H | -1.530259 | 0.319569  | -0.017630 |
| C | -3.997993 | 0.062185  | -1.259717 |
| H | -3.164183 | -1.935699 | -1.289630 |
| H | -2.187727 | -0.738765 | -2.156256 |
| C | -3.980717 | 0.089593  | 1.263042  |
| H | -3.145667 | -1.907349 | 1.325468  |
| H | -2.157799 | -0.691080 | 2.151637  |
| C | -4.837394 | -0.101222 | 0.009402  |
| H | -4.611059 | -0.112340 | -2.151322 |
| H | -3.627696 | 1.094691  | -1.321594 |
| H | -4.581444 | -0.065204 | 2.166600  |
| H | -3.609462 | 1.123040  | 1.297343  |
| H | -5.668182 | 0.613649  | 0.007314  |
| H | -5.280885 | -1.107691 | 0.023334  |

### TS-3

M06-2X SCF energy in solution: -2135.48898352 a.u.  
M06-2X enthalpy in solution: -2135.104668 a.u.  
M06-2X free energy in solution: -2135.191873 a.u.  
M06-2X free energy in solution after quasi-harmonic correction: -2135.184517 a.u.  
Imaginary frequency: -634.7545 cm<sup>-1</sup>

### Cartesian coordinates

| ATOM | X        | Y         | Z         |
|------|----------|-----------|-----------|
| C    | 1.010856 | -2.386669 | -0.027562 |
| C    | 1.863932 | -2.551474 | -1.139204 |
| C    | 1.360140 | -2.917915 | 1.233179  |
| C    | 3.056530 | -3.240422 | -0.981670 |

|    |           |           |           |
|----|-----------|-----------|-----------|
| H  | 1.586884  | -2.115306 | -2.092690 |
| C  | 2.554806  | -3.605622 | 1.374118  |
| H  | 0.688525  | -2.778975 | 2.074929  |
| C  | 3.399264  | -3.760732 | 0.269625  |
| H  | 3.729553  | -3.358319 | -1.824498 |
| H  | 2.838116  | -4.014427 | 2.338539  |
| H  | 4.340071  | -4.290764 | 0.388052  |
| C  | -0.185118 | -1.668425 | -0.164901 |
| C  | -1.174035 | -0.909672 | -0.242352 |
| B  | 2.613959  | 0.729450  | -0.972443 |
| F  | 3.713717  | 0.199605  | -1.664600 |
| F  | 2.577629  | 0.210714  | 0.334003  |
| F  | 2.713728  | 2.130491  | -0.911099 |
| F  | 1.424264  | 0.380859  | -1.644574 |
| C  | -0.309457 | 2.580566  | -0.464181 |
| C  | 0.421852  | 1.812976  | 1.562510  |
| C  | 0.994101  | 3.033746  | 1.889152  |
| C  | 0.882837  | 4.059432  | 0.954756  |
| C  | 0.211656  | 3.846907  | -0.245509 |
| H  | 1.504383  | 3.167737  | 2.835500  |
| H  | 1.320176  | 5.030440  | 1.164629  |
| H  | 0.104658  | 4.624192  | -0.992652 |
| N  | -0.204079 | 1.589757  | 0.413491  |
| H  | -0.612731 | 0.190094  | 0.033202  |
| Cl | -1.181695 | 2.225880  | -1.917906 |
| Cl | 0.456088  | 0.494939  | 2.687700  |
| C  | -2.653032 | -0.810768 | -0.467059 |
| C  | -3.284383 | -2.202482 | -0.610499 |
| C  | -3.321261 | -0.008434 | 0.660706  |
| H  | -2.789805 | -0.259505 | -1.408347 |

|   |           |           |           |
|---|-----------|-----------|-----------|
| C | -4.792728 | -2.088544 | -0.841689 |
| H | -3.091435 | -2.770260 | 0.310723  |
| H | -2.803584 | -2.741564 | -1.434658 |
| C | -4.830339 | 0.093050  | 0.425936  |
| H | -3.124957 | -0.513890 | 1.617146  |
| H | -2.877196 | 0.992251  | 0.725628  |
| C | -5.466758 | -1.290807 | 0.277010  |
| H | -5.230041 | -3.090717 | -0.915684 |
| H | -4.974058 | -1.589717 | -1.804394 |
| H | -5.295255 | 0.641938  | 1.252499  |
| H | -5.012057 | 0.676938  | -0.487870 |
| H | -6.540335 | -1.193534 | 0.079087  |
| H | -5.364058 | -1.839371 | 1.224394  |

**TS-3a**

M06-2X SCF energy in solution: -2135.48335228 a.u.  
M06-2X enthalpy in solution: -2135.098994 a.u.  
M06-2X free energy in solution: -2135.189850 a.u.  
M06-2X free energy in solution after quasi-harmonic correction: -2135.179334 a.u.  
Imaginary frequency: -851.6812 cm<sup>-1</sup>

Cartesian coordinates

| ATOM | X         | Y         | Z         |
|------|-----------|-----------|-----------|
| C    | -1.723587 | -1.322367 | 0.000005  |
| C    | -2.147255 | -1.873810 | -1.223691 |
| C    | -2.147242 | -1.873947 | 1.223644  |
| C    | -2.979135 | -2.984716 | -1.216234 |
| H    | -1.834064 | -1.410891 | -2.154447 |
| C    | -2.979122 | -2.984852 | 1.216071  |
| H    | -1.834037 | -1.411138 | 2.154450  |

|    |           |           |           |
|----|-----------|-----------|-----------|
| C  | -3.390480 | -3.536982 | -0.000110 |
| H  | -3.319529 | -3.414000 | -2.152978 |
| H  | -3.319506 | -3.414242 | 2.152770  |
| H  | -4.049716 | -4.400404 | -0.000155 |
| C  | -0.903487 | -0.171844 | 0.000061  |
| C  | -0.025162 | 0.701907  | 0.000113  |
| B  | -3.793834 | 1.371053  | 0.000078  |
| F  | -4.634865 | 0.247127  | -0.000049 |
| F  | -2.973523 | 1.344960  | 1.147796  |
| F  | -2.973413 | 1.345142  | -1.147568 |
| F  | -4.561624 | 2.545073  | 0.000134  |
| C  | 2.642926  | -1.445468 | -1.147765 |
| C  | 2.642972  | -1.445500 | 1.147740  |
| C  | 3.834100  | -2.154288 | 1.207914  |
| C  | 4.432535  | -2.502953 | -0.000063 |
| C  | 3.834052  | -2.154256 | -1.208006 |
| H  | 4.267969  | -2.421998 | 2.164036  |
| H  | 5.365973  | -3.056602 | -0.000088 |
| H  | 4.267880  | -2.421941 | -2.164154 |
| N  | 2.068698  | -1.091457 | 0.000003  |
| H  | 0.887143  | -0.242251 | 0.000055  |
| Cl | 1.810762  | -0.992703 | -2.595508 |
| Cl | 1.810861  | -0.992777 | 2.595525  |
| C  | 0.458652  | 2.110255  | 0.000111  |
| C  | 1.279173  | 2.411602  | 1.263777  |
| C  | 1.278776  | 2.411689  | -1.263793 |
| H  | -0.442996 | 2.737522  | 0.000274  |
| C  | 1.743025  | 3.869820  | 1.262127  |
| H  | 2.156274  | 1.747105  | 1.283234  |
| H  | 0.682797  | 2.192402  | 2.156196  |

|   |          |          |           |
|---|----------|----------|-----------|
| C | 1.742629 | 3.869906 | -1.262196 |
| H | 2.155870 | 1.747191 | -1.283558 |
| H | 0.682122 | 2.192538 | -2.156039 |
| C | 2.544558 | 4.196930 | -0.000149 |
| H | 2.341634 | 4.066993 | 2.158645  |
| H | 0.862805 | 4.525487 | 1.314846  |
| H | 2.340957 | 4.067136 | -2.158888 |
| H | 0.862393 | 4.525577 | -1.314596 |
| H | 2.835916 | 5.253459 | -0.000158 |
| H | 3.474078 | 3.608691 | -0.000315 |

#### TS-4

M06-2X SCF energy in solution: -968.02286715 a.u.  
M06-2X enthalpy in solution: -967.713853 a.u.  
M06-2X free energy in solution: -967.781386 a.u.  
M06-2X free energy in solution after quasi-harmonic correction: -967.7764615 a.u.  
Imaginary frequency: -299.5191 cm-1

#### Cartesian coordinates

| ATOM | X         | Y         | Z         |
|------|-----------|-----------|-----------|
| C    | -1.068905 | -0.946393 | -0.154582 |
| C    | -1.444630 | -1.273913 | 1.165141  |
| C    | -1.574170 | -1.672938 | -1.253573 |
| C    | -2.302622 | -2.342786 | 1.378389  |
| H    | -1.060550 | -0.683016 | 1.990556  |
| C    | -2.440322 | -2.729360 | -1.024974 |
| H    | -1.284901 | -1.387847 | -2.260570 |
| C    | -2.800065 | -3.059774 | 0.286873  |
| H    | -2.597586 | -2.610613 | 2.387540  |
| H    | -2.841961 | -3.295602 | -1.858788 |



|   |           |           |           |
|---|-----------|-----------|-----------|
| H | -3.482749 | -3.887004 | 0.459211  |
| C | -0.184942 | 0.126682  | -0.365456 |
| C | 0.946383  | 0.754619  | -0.400975 |
| B | -2.510044 | 1.880705  | 0.023646  |
| F | -3.513844 | 0.942982  | -0.168758 |
| F | -1.417989 | 1.558270  | -0.908982 |
| F | -2.931253 | 3.163326  | -0.279380 |
| F | -1.976397 | 1.797381  | 1.306278  |
| H | 0.989751  | 1.819902  | -0.617121 |
| C | 2.240770  | 0.009335  | -0.125934 |
| C | 3.179797  | 0.149313  | -1.333233 |
| C | 2.889187  | 0.570154  | 1.149209  |
| H | 2.019023  | -1.054927 | 0.029946  |
| C | 4.523130  | -0.530757 | -1.055053 |
| H | 3.342860  | 1.218468  | -1.531922 |
| H | 2.706603  | -0.278168 | -2.224651 |
| C | 4.233800  | -0.112189 | 1.415972  |
| H | 3.043311  | 1.651477  | 1.023011  |
| H | 2.210573  | 0.436932  | 1.999618  |
| C | 5.172810  | 0.022481  | 0.215290  |
| H | 5.187366  | -0.395642 | -1.916065 |
| H | 4.363908  | -1.612403 | -0.940684 |
| H | 4.692257  | 0.320262  | 2.312392  |
| H | 4.062837  | -1.177493 | 1.626478  |
| H | 6.117569  | -0.496323 | 0.413834  |
| H | 5.415921  | 1.083992  | 0.063997  |

**TS-4a**

M06-2X SCF energy in solution: -968.02320645 a.u.

M06-2X enthalpy in solution: -967.714204 a.u.  
S109

M06-2X free energy in solution: -967.781631 a.u.

M06-2X free energy in solution after quasi-harmonic correction: -967.7766189 a.u.

Imaginary frequency: -302.9303 cm-1

Cartesian coordinates

| ATOM | X         | Y         | Z         |
|------|-----------|-----------|-----------|
| C    | 2.119698  | -0.843507 | 0.123053  |
| C    | 2.805227  | -0.197033 | 1.172490  |
| C    | 2.825886  | -1.523163 | -0.891646 |
| C    | 4.190624  | -0.253181 | 1.210346  |
| H    | 2.239508  | 0.335447  | 1.929753  |
| C    | 4.210517  | -1.567146 | -0.841669 |
| H    | 2.275729  | -2.002200 | -1.695772 |
| C    | 4.886417  | -0.933270 | 0.206221  |
| H    | 4.732162  | 0.235953  | 2.013252  |
| H    | 4.767161  | -2.087928 | -1.613862 |
| H    | 5.971687  | -0.968106 | 0.238993  |
| C    | 0.711254  | -0.825760 | 0.092547  |
| C    | -0.490703 | -1.235083 | 0.339284  |
| B    | 0.269785  | 2.086445  | -0.392599 |
| F    | 0.435856  | 0.774918  | -1.036467 |
| F    | 1.209320  | 2.937772  | -0.947577 |
| F    | -1.027994 | 2.506672  | -0.646310 |
| F    | 0.484862  | 1.900891  | 0.970588  |
| H    | -0.457609 | -2.146097 | 0.952379  |
| C    | -1.850998 | -0.697702 | -0.018329 |
| C    | -2.714101 | -1.815698 | -0.622293 |
| C    | -2.515400 | -0.109189 | 1.238162  |
| H    | -1.726513 | 0.099702  | -0.755869 |
| C    | -4.117027 | -1.295664 | -0.945239 |

|   |           |           |           |
|---|-----------|-----------|-----------|
| H | -2.786392 | -2.642747 | 0.099665  |
| H | -2.233898 | -2.211881 | -1.524588 |
| C | -3.919465 | 0.403591  | 0.908500  |
| H | -2.578828 | -0.889886 | 2.010668  |
| H | -1.894308 | 0.699949  | 1.637012  |
| C | -4.786020 | -0.698214 | 0.294658  |
| H | -4.725617 | -2.109535 | -1.355790 |
| H | -4.044190 | -0.525027 | -1.725324 |
| H | -4.387671 | 0.799062  | 1.817050  |
| H | -3.835879 | 1.240323  | 0.201218  |
| H | -5.775138 | -0.302631 | 0.036771  |
| H | -4.942994 | -1.492794 | 1.038833  |

**E-1**

M06-2X SCF energy in solution: -643.47375760 a.u.  
M06-2X enthalpy in solution: -643.180238 a.u.  
M06-2X free energy in solution: -643.234627 a.u.  
M06-2X free energy in solution after quasi-harmonic correction: -643.2329134 a.u.

Cartesian coordinates

| ATOM | X         | Y         | Z         |
|------|-----------|-----------|-----------|
| C    | 0.431752  | 1.469311  | -0.315552 |
| C    | -0.899881 | 1.431676  | -0.342161 |
| C    | -1.846309 | 0.322825  | -0.120693 |
| C    | -1.581734 | -0.968203 | -0.595605 |
| C    | -3.046807 | 0.568647  | 0.560661  |
| C    | -2.488715 | -2.001120 | -0.366135 |
| H    | -0.678651 | -1.159146 | -1.167971 |
| C    | -3.951613 | -0.465322 | 0.785853  |
| H    | -3.265152 | 1.570868  | 0.917531  |

|   |           |           |           |
|---|-----------|-----------|-----------|
| C | -3.673072 | -1.753973 | 0.327726  |
| H | -2.275216 | -2.997065 | -0.743301 |
| H | -4.875853 | -0.264479 | 1.319929  |
| H | -4.380739 | -2.559344 | 0.501912  |
| C | 1.367592  | 0.344153  | 0.021668  |
| C | 2.121787  | -0.145851 | -1.227364 |
| C | 2.370707  | 0.798769  | 1.096156  |
| H | 0.796459  | -0.499312 | 0.433135  |
| C | 3.116185  | -1.257260 | -0.883134 |
| H | 2.661380  | 0.705786  | -1.668510 |
| H | 1.405575  | -0.490390 | -1.983625 |
| C | 3.366431  | -0.311091 | 1.441485  |
| H | 2.917986  | 1.676234  | 0.719516  |
| H | 1.828418  | 1.120812  | 1.993319  |
| C | 4.103778  | -0.803073 | 0.194024  |
| H | 3.652910  | -1.571670 | -1.785980 |
| H | 2.562737  | -2.135403 | -0.519156 |
| H | 4.081308  | 0.048827  | 2.190767  |
| H | 2.824715  | -1.152643 | 1.896934  |
| H | 4.786492  | -1.620897 | 0.453175  |
| H | 4.721390  | 0.014468  | -0.205658 |
| F | -1.554896 | 2.611281  | -0.586646 |
| H | 0.889701  | 2.434903  | -0.533782 |

## Z-2

M06-2X SCF energy in solution: -643.47617263 a.u.  
M06-2X enthalpy in solution: -643.182459 a.u.  
M06-2X free energy in solution: -643.238851 a.u.  
M06-2X free energy in solution after quasi-harmonic correction: -643.2351597 a.u.

Cartesian coordinates

| ATOM | X         | Y         | Z         |
|------|-----------|-----------|-----------|
| C    | -0.340134 | -0.303439 | 0.067806  |
| C    | 0.735753  | 0.460501  | -0.121442 |
| C    | 2.163855  | 0.104346  | -0.038108 |
| C    | 2.573209  | -1.232284 | 0.086914  |
| C    | 3.138257  | 1.109643  | -0.083425 |
| C    | 3.923828  | -1.550092 | 0.175573  |
| H    | 1.837039  | -2.030200 | 0.104631  |
| C    | 4.491982  | 0.785551  | 0.003650  |
| H    | 2.838012  | 2.147112  | -0.184477 |
| C    | 4.890789  | -0.542570 | 0.135093  |
| H    | 4.223835  | -2.589804 | 0.269799  |
| H    | 5.234583  | 1.577530  | -0.031860 |
| H    | 5.945213  | -0.794273 | 0.201534  |
| C    | -1.766667 | 0.147186  | -0.044626 |
| C    | -2.503118 | -0.660260 | -1.128503 |
| C    | -2.488202 | -0.000032 | 1.307042  |
| H    | -1.788456 | 1.206752  | -0.331455 |
| C    | -3.975993 | -0.256066 | -1.228178 |
| H    | -2.434823 | -1.730256 | -0.879089 |
| H    | -2.001024 | -0.524312 | -2.093800 |
| C    | -3.961098 | 0.403671  | 1.205451  |
| H    | -2.418722 | -1.049448 | 1.632021  |
| H    | -1.975424 | 0.603753  | 2.065216  |
| C    | -4.683273 | -0.399230 | 0.121241  |
| H    | -4.478889 | -0.863441 | -1.990004 |
| H    | -4.040801 | 0.789879  | -1.561170 |
| H    | -4.453692 | 0.266198  | 2.175289  |
| H    | -4.025056 | 1.474696  | 0.964792  |

|   |           |           |           |
|---|-----------|-----------|-----------|
| H | -5.727505 | -0.075064 | 0.039692  |
| H | -4.699729 | -1.460688 | 0.409023  |
| H | -0.173201 | -1.345638 | 0.332765  |
| F | 0.549281  | 1.777296  | -0.430425 |

### 107

M06-2X SCF energy in solution: -347.66381256 a.u.  
M06-2X enthalpy in solution: -347.515112 a.u.  
M06-2X free energy in solution: -347.557987 a.u.  
M06-2X free energy in solution after quasi-harmonic correction: -347.5572986 a.u.

### Cartesian coordinates

| ATOM | X         | Y         | Z         |
|------|-----------|-----------|-----------|
| C    | 0.042875  | -0.000006 | 0.000164  |
| C    | 0.752427  | 1.211413  | 0.000032  |
| C    | 0.752407  | -1.211428 | 0.000067  |
| C    | 2.144780  | 1.207463  | -0.000003 |
| H    | 0.204739  | 2.149250  | 0.000103  |
| C    | 2.144778  | -1.207476 | -0.000006 |
| H    | 0.204712  | -2.149260 | 0.000129  |
| C    | 2.844598  | -0.000015 | -0.000049 |
| H    | 2.684738  | 2.149932  | 0.000000  |
| H    | 2.684731  | -2.149947 | -0.000054 |
| H    | 3.930834  | -0.000019 | -0.000056 |
| C    | -1.395057 | 0.000039  | -0.000023 |
| C    | -2.606953 | 0.000059  | -0.000370 |
| C    | -4.069785 | -0.000001 | -0.000012 |
| H    | -4.457182 | -0.154210 | 1.012081  |
| H    | -4.456272 | 0.953647  | -0.371995 |
| H    | -4.456722 | -0.799682 | -0.639004 |

**108**

M06-2X SCF energy in solution: -772.69740850 a.u.  
M06-2X enthalpy in solution: -772.515862 a.u.  
M06-2X free energy in solution: -772.575496 a.u.  
M06-2X free energy in solution after quasi-harmonic correction: -772.5723547 a.u.

## Cartesian coordinates

| ATOM | X         | Y         | Z         |
|------|-----------|-----------|-----------|
| C    | -0.650503 | -1.008706 | -0.002891 |
| C    | -1.230239 | -0.625626 | 1.241608  |
| C    | -1.376631 | -0.863572 | -1.220977 |
| C    | -2.517041 | -0.128731 | 1.257967  |
| H    | -0.642703 | -0.721380 | 2.148683  |
| C    | -2.658930 | -0.358801 | -1.181970 |
| H    | -0.898622 | -1.139624 | -2.155647 |
| C    | -3.219238 | 0.004790  | 0.051980  |
| H    | -2.977895 | 0.174274  | 2.191660  |
| H    | -3.227768 | -0.229581 | -2.096148 |
| H    | -4.227118 | 0.410074  | 0.072192  |
| C    | 0.634224  | -1.472414 | -0.032704 |
| C    | 1.837721  | -1.925352 | -0.046632 |
| C    | 2.234034  | -3.373470 | 0.104642  |
| H    | 2.792211  | -3.681885 | -0.783472 |
| H    | 2.890580  | -3.469972 | 0.973583  |
| H    | 1.364576  | -4.019522 | 0.231360  |
| B    | 1.072323  | 1.777976  | -0.033451 |
| F    | -0.298023 | 2.023745  | -0.213167 |
| F    | 1.521971  | 0.900938  | -1.049093 |
| F    | 1.791799  | 2.974583  | -0.091838 |

|   |          |           |           |
|---|----------|-----------|-----------|
| F | 1.276576 | 1.152381  | 1.214052  |
| H | 2.613815 | -1.165783 | -0.180686 |

**108a**

M06-2X SCF energy in solution: -772.69800641 a.u.

M06-2X enthalpy in solution: -772.516367 a.u.

M06-2X free energy in solution: -772.574832 a.u.

M06-2X free energy in solution after quasi-harmonic correction: -772.5725091 a.u.

Cartesian coordinates

| ATOM | X         | Y         | Z         |
|------|-----------|-----------|-----------|
| C    | -0.833727 | -1.076037 | -0.000017 |
| C    | -1.444101 | -0.724569 | -1.238564 |
| C    | -1.443810 | -0.724236 | 1.238588  |
| C    | -2.651738 | -0.058636 | -1.227125 |
| H    | -0.940383 | -0.980046 | -2.165367 |
| C    | -2.651486 | -0.058369 | 1.227268  |
| H    | -0.939841 | -0.979437 | 2.165330  |
| C    | -3.245343 | 0.270250  | 0.000099  |
| H    | -3.133862 | 0.223209  | -2.156751 |
| H    | -3.133425 | 0.223665  | 2.156934  |
| H    | -4.191678 | 0.804002  | 0.000142  |
| C    | 0.370171  | -1.723349 | -0.000016 |
| C    | 1.460736  | -2.405402 | 0.000119  |
| C    | 2.878259  | -1.891547 | 0.000050  |
| H    | 2.900837  | -0.804163 | -0.000330 |
| H    | 3.389150  | -2.276820 | 0.886962  |
| H    | 3.389241  | -2.277313 | -0.886604 |
| B    | 1.139687  | 1.474394  | -0.000066 |
| F    | -0.194090 | 1.907245  | -0.000002 |



|   |          |           |           |
|---|----------|-----------|-----------|
| F | 2.005689 | 2.571286  | -0.000216 |
| F | 1.373522 | 0.679510  | 1.145195  |
| F | 1.373311 | 0.679329  | -1.145266 |
| H | 1.301871 | -3.490023 | 0.000212  |

#### TS-5

M06-2X SCF energy in solution: -1940.15662007 a.u.  
M06-2X enthalpy in solution: -1939.900421 a.u.  
M06-2X free energy in solution: -1939.977209 a.u.  
M06-2X free energy in solution after quasi-harmonic correction: -1939.972733 a.u.  
Imaginary frequency: -751.0513 cm-1

#### Cartesian coordinates

| ATOM | X         | Y         | Z         |
|------|-----------|-----------|-----------|
| C    | -2.478431 | 0.920583  | -0.008104 |
| C    | -3.061967 | 0.528361  | -1.231232 |
| C    | -3.066251 | 0.553163  | 1.220639  |
| C    | -4.232264 | -0.213820 | -1.218041 |
| H    | -2.577929 | 0.802390  | -2.163337 |
| C    | -4.236735 | -0.188896 | 1.218063  |
| H    | -2.585715 | 0.846057  | 2.148744  |
| C    | -4.814062 | -0.569536 | 0.002743  |
| H    | -4.687627 | -0.528955 | -2.151132 |
| H    | -4.695882 | -0.484705 | 2.155606  |
| H    | -5.726338 | -1.159278 | 0.006990  |
| C    | -1.304293 | 1.686982  | -0.014409 |
| C    | -0.212672 | 2.290890  | -0.020838 |
| C    | 0.493570  | 3.603082  | -0.031773 |
| H    | -0.220696 | 4.428148  | -0.048668 |
| H    | 1.124106  | 3.683820  | 0.858459  |

|    |           |           |           |
|----|-----------|-----------|-----------|
| H  | 1.140365  | 3.661228  | -0.912011 |
| B  | -0.462885 | -1.721315 | 0.031851  |
| F  | -1.703739 | -2.371366 | 0.036661  |
| F  | -0.353456 | -0.895664 | 1.169839  |
| F  | 0.580819  | -2.661087 | 0.044024  |
| F  | -0.350948 | -0.922090 | -1.124414 |
| C  | 2.330988  | 0.036403  | -1.153809 |
| C  | 2.344145  | 0.068944  | 1.136417  |
| C  | 3.261395  | -0.968610 | 1.208688  |
| C  | 3.702803  | -1.512785 | 0.005846  |
| C  | 3.247439  | -1.003036 | -1.206930 |
| H  | 3.606179  | -1.334406 | 2.168306  |
| H  | 4.410763  | -2.335575 | 0.013574  |
| H  | 3.581285  | -1.396003 | -2.159610 |
| N  | 1.882321  | 0.548251  | -0.013064 |
| H  | 0.629903  | 1.347980  | -0.015548 |
| Cl | 1.741625  | 0.771363  | -2.606379 |
| Cl | 1.772710  | 0.846262  | 2.574160  |

**TS-5a**

M06-2X SCF energy in solution: -1940.15080370 a.u.  
M06-2X enthalpy in solution: -1939.894878 a.u.  
M06-2X free energy in solution: -1939.976304 a.u.  
M06-2X free energy in solution after quasi-harmonic correction: -1939.967893 a.u.  
Imaginary frequency: -638.9062 cm<sup>-1</sup>

Cartesian coordinates

| ATOM | X        | Y        | Z         |
|------|----------|----------|-----------|
| C    | 1.091725 | 0.922057 | 0.008436  |
| C    | 1.290358 | 1.663609 | -1.171380 |

S118

|   |           |           |           |
|---|-----------|-----------|-----------|
| C | 1.350358  | 1.489863  | 1.270127  |
| C | 1.731179  | 2.976501  | -1.081117 |
| H | 1.113419  | 1.193634  | -2.134057 |
| C | 1.791649  | 2.803430  | 1.344939  |
| H | 1.220772  | 0.887285  | 2.163763  |
| C | 1.979994  | 3.541217  | 0.173008  |
| H | 1.896223  | 3.556886  | -1.983076 |
| H | 2.003222  | 3.250740  | 2.310760  |
| H | 2.335679  | 4.565592  | 0.237173  |
| C | 0.665947  | -0.422614 | -0.075032 |
| C | 0.086361  | -1.515412 | -0.133106 |
| C | -0.004450 | -2.987042 | -0.230545 |
| H | 1.003617  | -3.404494 | -0.285702 |
| H | -0.518529 | -3.388993 | 0.646782  |
| H | -0.565640 | -3.268781 | -1.125757 |
| B | 3.881720  | -1.018462 | -0.032069 |
| F | 4.309250  | 0.317775  | -0.050444 |
| F | 3.120272  | -1.254659 | 1.131547  |
| F | 3.072943  | -1.268681 | -1.161394 |
| F | 4.991102  | -1.875866 | -0.050240 |
| C | -3.084039 | -0.074006 | -1.130371 |
| C | -3.055445 | -0.225493 | 1.157222  |
| C | -4.356829 | 0.243121  | 1.266356  |
| C | -5.022567 | 0.558043  | 0.084514  |
| C | -4.387511 | 0.401086  | -1.144858 |
| H | -4.824564 | 0.355044  | 2.237342  |
| H | -6.042468 | 0.927219  | 0.121708  |
| H | -4.879643 | 0.636788  | -2.081140 |
| N | -2.435430 | -0.377717 | -0.009570 |
| H | -1.033220 | -0.870460 | -0.063430 |

|    |           |           |           |
|----|-----------|-----------|-----------|
| Cl | -2.207194 | -0.303526 | -2.605669 |
| Cl | -2.144096 | -0.650441 | 2.566175  |

### TS-6

M06-2X SCF energy in solution: -772.69054680 a.u.  
M06-2X enthalpy in solution: -772.509873 a.u.  
M06-2X free energy in solution: -772.566737 a.u.  
M06-2X free energy in solution after quasi-harmonic correction: -772.5638336 a.u.  
Imaginary frequency: -306.1641 cm<sup>-1</sup>

### Cartesian coordinates

| ATOM | X         | Y         | Z         |
|------|-----------|-----------|-----------|
| C    | 0.912982  | 0.500825  | -0.085483 |
| C    | 1.281097  | -0.014209 | 1.176200  |
| C    | 1.652516  | 0.177342  | -1.244347 |
| C    | 2.400104  | -0.827075 | 1.273951  |
| H    | 0.682143  | 0.230547  | 2.047316  |
| C    | 2.760028  | -0.645967 | -1.131705 |
| H    | 1.336062  | 0.570770  | -2.205498 |
| C    | 3.128245  | -1.144173 | 0.123712  |
| H    | 2.699449  | -1.227865 | 2.236602  |
| H    | 3.336532  | -0.908721 | -2.012469 |
| H    | 3.995468  | -1.793376 | 0.204370  |
| C    | -0.213197 | 1.332422  | -0.186487 |
| C    | -0.919174 | 2.417885  | -0.123390 |
| C    | -0.277638 | 3.732783  | 0.246372  |
| H    | -0.429659 | 4.444989  | -0.569846 |
| H    | -0.768921 | 4.126038  | 1.141046  |
| H    | 0.791520  | 3.628146  | 0.439595  |
| B    | -1.814499 | -1.135940 | -0.003119 |

|   |           |           |           |
|---|-----------|-----------|-----------|
| F | -0.805487 | -2.040152 | -0.301667 |
| F | -1.588878 | 0.064820  | -0.821783 |
| F | -3.065086 | -1.623737 | -0.339141 |
| F | -1.755600 | -0.729036 | 1.326668  |
| H | -1.984424 | 2.383123  | -0.335146 |

**TS-6a**

M06-2X SCF energy in solution: -772.69137669 a.u.  
M06-2X enthalpy in solution: -772.510914 a.u.  
M06-2X free energy in solution: -772.569025 a.u.  
M06-2X free energy in solution after quasi-harmonic correction: -772.5652408 a.u.  
Imaginary frequency: -297.7995 cm<sup>-1</sup>

Cartesian coordinates

| ATOM | X         | Y         | Z         |
|------|-----------|-----------|-----------|
| C    | -1.095505 | 0.719225  | 0.052795  |
| C    | -1.516660 | -0.024255 | 1.175663  |
| C    | -1.921519 | 0.843856  | -1.084905 |
| C    | -2.771566 | -0.614777 | 1.163724  |
| H    | -0.852324 | -0.125648 | 2.028158  |
| C    | -3.170117 | 0.243836  | -1.083301 |
| H    | -1.565514 | 1.404649  | -1.943701 |
| C    | -3.589624 | -0.480832 | 0.038333  |
| H    | -3.111541 | -1.186827 | 2.020617  |
| H    | -3.818214 | 0.330524  | -1.949123 |
| H    | -4.568501 | -0.951722 | 0.032218  |
| C    | 0.170260  | 1.330623  | 0.069927  |
| C    | 1.062725  | 2.227747  | 0.339858  |
| C    | 2.544223  | 2.276760  | 0.136921  |
| H    | 2.803948  | 3.190999  | -0.404196 |

|   |          |           |           |
|---|----------|-----------|-----------|
| H | 3.030885 | 2.315876  | 1.116363  |
| H | 2.901010 | 1.407294  | -0.411123 |
| B | 1.632673 | -1.230573 | -0.126838 |
| F | 1.211162 | -0.059330 | -0.905099 |
| F | 0.621882 | -2.176276 | -0.213617 |
| F | 2.818372 | -1.681388 | -0.682717 |
| F | 1.811008 | -0.799698 | 1.186249  |
| H | 0.581760 | 3.084858  | 0.827546  |

**E-95**

M06-2X SCF energy in solution: -448.14319944 a.u.  
M06-2X enthalpy in solution: -447.977904 a.u.  
M06-2X free energy in solution: -448.021817 a.u.  
M06-2X free energy in solution after quasi-harmonic correction: -448.0212987 a.u.

Cartesian coordinates

| ATOM | X         | Y         | Z         |
|------|-----------|-----------|-----------|
| C    | 0.089204  | 0.222236  | -0.079377 |
| C    | 0.538236  | -1.039535 | -0.490367 |
| C    | 1.019299  | 1.163123  | 0.385067  |
| C    | 1.891223  | -1.363976 | -0.409470 |
| H    | -0.166952 | -1.757693 | -0.898036 |
| C    | 2.370150  | 0.835499  | 0.462537  |
| H    | 0.679652  | 2.148609  | 0.689810  |
| C    | 2.809260  | -0.430251 | 0.070652  |
| H    | 2.229207  | -2.343555 | -0.734994 |
| H    | 3.081553  | 1.569461  | 0.829855  |
| H    | 3.863756  | -0.683832 | 0.130308  |
| C    | -1.337961 | 0.580897  | -0.147834 |
| C    | -2.431043 | -0.148001 | 0.073197  |

|   |           |           |           |
|---|-----------|-----------|-----------|
| C | -2.472743 | -1.575522 | 0.531567  |
| H | -3.285179 | -1.705373 | 1.253566  |
| H | -2.671712 | -2.260389 | -0.302051 |
| H | -1.539709 | -1.884748 | 1.010129  |
| H | -3.381798 | 0.361537  | -0.070600 |
| F | -1.518063 | 1.898796  | -0.475979 |

### Z-95

M06-2X SCF energy in solution: -448.14595773 a.u.  
M06-2X enthalpy in solution: -447.980767 a.u.  
M06-2X free energy in solution: -448.025667 a.u.  
M06-2X free energy in solution after quasi-harmonic correction: -448.0249025 a.u.

### Cartesian coordinates

| ATOM | X         | Y         | Z         |
|------|-----------|-----------|-----------|
| C    | 0.253328  | 0.035832  | -0.021565 |
| C    | 1.065817  | 1.169671  | 0.108504  |
| C    | 0.858347  | -1.224942 | -0.133791 |
| C    | 2.453887  | 1.042570  | 0.142388  |
| H    | 0.611309  | 2.151715  | 0.187921  |
| C    | 2.243338  | -1.347020 | -0.094878 |
| H    | 0.248421  | -2.113434 | -0.267772 |
| C    | 3.047998  | -0.214060 | 0.044954  |
| H    | 3.070109  | 1.931019  | 0.246254  |
| H    | 2.696997  | -2.329753 | -0.185566 |
| H    | 4.129332  | -0.312139 | 0.070254  |
| C    | -1.213055 | 0.182029  | -0.035730 |
| C    | -2.155007 | -0.741849 | 0.151333  |
| C    | -3.629578 | -0.487412 | 0.107650  |
| H    | -4.093537 | -0.747826 | 1.065985  |

|   |           |           |           |
|---|-----------|-----------|-----------|
| H | -3.855909 | 0.557902  | -0.112263 |
| H | -4.103653 | -1.112667 | -0.657825 |
| F | -1.603497 | 1.471212  | -0.257649 |
| H | -1.822052 | -1.754642 | 0.358660  |

**TS-7**

M06-2X SCF energy in solution: -2232.35208945 a.u.  
M06-2X enthalpy in solution: -2232.021755 a.u.  
M06-2X free energy in solution: -2232.107110 a.u.  
M06-2X free energy in solution after quasi-harmonic correction: -2232.100588 a.u.  
Imaginary frequency: -1319.4377 cm-1

Cartesian coordinates

| ATOM | X         | Y         | Z         |
|------|-----------|-----------|-----------|
| C    | -1.935099 | 1.515827  | -0.393332 |
| C    | -2.771342 | 0.964956  | 0.597934  |
| C    | -1.912878 | 2.910412  | -0.590884 |
| C    | -3.573727 | 1.799516  | 1.364127  |
| H    | -2.796074 | -0.103486 | 0.774269  |
| C    | -2.718328 | 3.734430  | 0.182764  |
| H    | -1.252594 | 3.341187  | -1.335079 |
| C    | -3.550046 | 3.180761  | 1.157678  |
| H    | -4.218385 | 1.372120  | 2.125492  |
| H    | -2.692478 | 4.808555  | 0.030696  |
| H    | -4.179970 | 3.827387  | 1.761808  |
| C    | -1.060293 | 0.698387  | -1.209458 |
| C    | -0.736014 | -0.660326 | -1.166690 |
| F    | -0.426031 | 1.381123  | -2.139330 |
| H    | -0.175625 | -0.945805 | -2.062358 |



|    |           |           |           |
|----|-----------|-----------|-----------|
| C  | -1.713564 | -1.701003 | -0.686420 |
| C  | -1.435403 | -2.555644 | 0.383685  |
| C  | -2.926983 | -1.846690 | -1.373072 |
| C  | -2.362030 | -3.524258 | 0.773839  |
| H  | -0.497777 | -2.470731 | 0.925018  |
| C  | -3.851896 | -2.811575 | -0.983321 |
| H  | -3.146160 | -1.191123 | -2.212988 |
| C  | -3.572806 | -3.651876 | 0.096173  |
| H  | -2.133296 | -4.178123 | 1.610444  |
| H  | -4.789605 | -2.908071 | -1.523046 |
| H  | -4.293290 | -4.404465 | 0.402877  |
| B  | 2.293307  | 1.796819  | -0.888554 |
| F  | 2.415470  | 2.964794  | -1.649310 |
| F  | 1.142333  | 1.882902  | -0.071648 |
| F  | 2.166186  | 0.681016  | -1.737392 |
| F  | 3.420633  | 1.627306  | -0.068236 |
| C  | 1.471486  | -0.305549 | 1.714211  |
| C  | 2.475341  | -1.541993 | 0.058824  |
| C  | 3.686460  | -1.567355 | 0.733237  |
| C  | 3.754050  | -0.906208 | 1.955995  |
| C  | 2.629551  | -0.271550 | 2.475184  |
| H  | 4.539119  | -2.084688 | 0.309934  |
| H  | 4.685946  | -0.893955 | 2.512110  |
| H  | 2.643829  | 0.237804  | 3.431268  |
| N  | 1.402618  | -0.909640 | 0.530348  |
| H  | 0.300674  | -0.664398 | -0.309022 |
| Cl | 0.006208  | 0.401571  | 2.296186  |
| Cl | 2.280535  | -2.398904 | -1.429167 |

**102b**

M06-2X SCF energy in solution: -2232.36525031 a.u.  
M06-2X enthalpy in solution: -2232.029260 a.u.  
M06-2X free energy in solution: -2232.121761 a.u.  
M06-2X free energy in solution after quasi-harmonic correction: -2232.110398 a.u.

## Cartesian coordinates

| ATOM | X        | Y         | Z         |
|------|----------|-----------|-----------|
| C    | 2.656846 | -1.017866 | 0.673368  |
| C    | 2.404991 | -1.426273 | -0.661258 |
| C    | 3.791098 | -1.502191 | 1.377389  |
| C    | 3.284375 | -2.300133 | -1.275529 |
| H    | 1.527090 | -1.072139 | -1.193109 |
| C    | 4.654208 | -2.375262 | 0.747203  |
| H    | 3.973426 | -1.184727 | 2.398654  |
| C    | 4.400639 | -2.769414 | -0.575264 |
| H    | 3.102371 | -2.622072 | -2.295069 |
| H    | 5.525442 | -2.754525 | 1.270103  |
| H    | 5.084767 | -3.457355 | -1.063984 |
| C    | 1.771145 | -0.121914 | 1.301461  |
| C    | 0.610751 | 0.586970  | 0.749825  |
| F    | 2.048904 | 0.196475  | 2.536694  |
| H    | 0.173349 | 0.059945  | -0.099405 |
| C    | 1.161144 | 1.948457  | 0.306434  |
| C    | 1.278331 | 2.997019  | 1.221348  |
| C    | 1.554602 | 2.125023  | -1.021259 |
| C    | 1.774332 | 4.229888  | 0.800431  |
| H    | 0.965098 | 2.855804  | 2.253099  |
| C    | 2.044633 | 3.360595  | -1.439248 |
| H    | 1.447956 | 1.308763  | -1.731606 |

|    |           |           |           |
|----|-----------|-----------|-----------|
| C  | 2.158892  | 4.411691  | -0.528634 |
| H  | 1.852742  | 5.049130  | 1.509084  |
| H  | 2.327598  | 3.502178  | -2.478012 |
| H  | 2.540170  | 5.374470  | -0.856276 |
| B  | -1.247770 | 0.226617  | -2.462285 |
| F  | -2.338223 | -0.359396 | -3.115274 |
| F  | -1.671523 | 0.896002  | -1.302868 |
| F  | -0.330255 | -0.789366 | -2.080378 |
| F  | -0.597525 | 1.123267  | -3.322456 |
| C  | -2.050139 | -1.771990 | 0.554197  |
| C  | -3.306008 | -0.055850 | 1.285674  |
| C  | -4.249401 | -0.215972 | 0.277320  |
| C  | -4.021986 | -1.237725 | -0.638631 |
| C  | -2.895271 | -2.045464 | -0.512110 |
| H  | -5.107643 | 0.441535  | 0.205741  |
| H  | -4.712344 | -1.395546 | -1.460878 |
| H  | -2.670832 | -2.836052 | -1.218088 |
| N  | -2.231699 | -0.809001 | 1.440715  |
| H  | -0.140527 | 0.704047  | 1.537088  |
| Cl | -0.616235 | -2.751938 | 0.786166  |
| Cl | -3.511378 | 1.224649  | 2.458029  |

**TS-8**

M06-2X SCF energy in solution: -2232.35818854 a.u.  
M06-2X enthalpy in solution: -2232.027955 a.u.  
M06-2X free energy in solution: -2232.113587 a.u.  
M06-2X free energy in solution after quasi-harmonic correction: -2232.106919 a.u.  
Imaginary frequency: -939.0572 cm-1  
S127

Cartesian coordinates

| ATOM | X         | Y         | Z         |
|------|-----------|-----------|-----------|
| C    | 1.840685  | 1.903294  | -0.088014 |
| C    | 2.282758  | 2.010613  | -1.420040 |
| C    | 2.771591  | 1.883222  | 0.967668  |
| C    | 3.641145  | 2.085249  | -1.687416 |
| H    | 1.573696  | 2.056386  | -2.239817 |
| C    | 4.127736  | 1.952065  | 0.687016  |
| H    | 2.427928  | 1.772993  | 1.990214  |
| C    | 4.561792  | 2.049197  | -0.636842 |
| H    | 3.986092  | 2.170467  | -2.712687 |
| H    | 4.848533  | 1.911228  | 1.497044  |
| H    | 5.625264  | 2.096602  | -0.852485 |
| C    | 0.438365  | 1.788624  | 0.214284  |
| C    | -0.601869 | 1.413543  | -0.645491 |
| F    | 0.123813  | 2.004121  | 1.471165  |
| H    | -0.304247 | 1.388729  | -1.693923 |
| C    | -2.044006 | 1.758931  | -0.423087 |
| C    | -2.490253 | 2.719033  | 0.491406  |
| C    | -2.985781 | 1.067799  | -1.196824 |
| C    | -3.854602 | 2.971147  | 0.631700  |
| H    | -1.783990 | 3.279631  | 1.094438  |
| C    | -4.347491 | 1.320664  | -1.054186 |
| H    | -2.645689 | 0.326906  | -1.917885 |
| C    | -4.787266 | 2.271281  | -0.132802 |
| H    | -4.187278 | 3.721088  | 1.343559  |
| H    | -5.063620 | 0.774951  | -1.661784 |
| H    | -5.848632 | 2.469760  | -0.015926 |
| B    | 2.011184  | -1.399121 | 0.968438  |

|    |           |           |           |
|----|-----------|-----------|-----------|
| F  | 1.507329  | -2.705489 | 1.079207  |
| F  | 1.084838  | -0.500377 | 1.545570  |
| F  | 3.237952  | -1.295917 | 1.637608  |
| F  | 2.172744  | -1.075966 | -0.389540 |
| C  | -0.497914 | -2.138465 | -1.314700 |
| C  | -1.422041 | -1.829945 | 0.756345  |
| C  | -1.583591 | -3.193845 | 0.953237  |
| C  | -1.151405 | -4.042554 | -0.060447 |
| C  | -0.600863 | -3.518681 | -1.226346 |
| H  | -2.023646 | -3.568262 | 1.869603  |
| H  | -1.247663 | -5.117328 | 0.056515  |
| H  | -0.261762 | -4.149680 | -2.039196 |
| N  | -0.887265 | -1.316187 | -0.346999 |
| H  | -0.579772 | 0.145353  | -0.413607 |
| Cl | 0.114403  | -1.400467 | -2.760274 |
| Cl | -1.954537 | -0.701551 | 1.954032  |

**The following coordinates are obtained through geometry optimization in dichloroethane (DCE):**

**2,6-dichloropyridinium tetrafluoroborate F (optimized in DCE)**

M06-2X SCF energy in DCE: -1592.52187456 a.u.  
M06-2X enthalpy in DCE: -1592.409256 a.u.  
M06-2X free energy in DCE: -1592.465853 a.u.  
M06-2X free energy in DCE after quasi-harmonic correction: -1592.462163 a.u.

Cartesian coordinates

| ATOM | X        | Y         | Z        |
|------|----------|-----------|----------|
| B    | 2.506561 | 0.127879  | 0.247439 |
| F    | 1.522610 | -0.044584 | 1.236201 |
| F    | 3.356696 | -0.973233 | 0.204039 |

S129

|    |           |           |           |
|----|-----------|-----------|-----------|
| F  | 1.816307  | 0.230873  | -1.009585 |
| F  | 3.219356  | 1.303303  | 0.465158  |
| C  | -1.535368 | 1.092640  | -0.102509 |
| C  | -1.265241 | -1.244577 | -0.121615 |
| C  | -2.531810 | -1.432048 | 0.398262  |
| C  | -3.302143 | -0.301868 | 0.664686  |
| C  | -2.810399 | 0.978544  | 0.417273  |
| H  | -2.896368 | -2.434490 | 0.587913  |
| H  | -4.300269 | -0.420184 | 1.073822  |
| H  | -3.392863 | 1.868490  | 0.623326  |
| N  | -0.802474 | -0.004660 | -0.361882 |
| H  | 0.169121  | 0.106239  | -0.720170 |
| Cl | -0.797378 | 2.595346  | -0.443893 |
| Cl | -0.206156 | -2.532418 | -0.489509 |

**101** (optimized in DCE)

M06-2X SCF energy in DCE: -539.37941602 a.u.  
M06-2X enthalpy in DCE: -539.173959 a.u.  
M06-2X free energy in DCE: -539.224576 a.u.  
M06-2X free energy in DCE after quasi-harmonic correction: -539.2217063 a.u.

Cartesian coordinates

| ATOM | X        | Y         | Z         |
|------|----------|-----------|-----------|
| C    | 2.040586 | 0.000084  | -0.000022 |
| C    | 2.748722 | 1.213047  | -0.000020 |
| C    | 2.748722 | -1.212879 | 0.000006  |
| C    | 4.140432 | 1.208276  | 0.000010  |
| H    | 2.200056 | 2.150201  | -0.000042 |

|   |           |           |           |
|---|-----------|-----------|-----------|
| C | 4.140432  | -1.208108 | 0.000033  |
| H | 2.200056  | -2.150034 | 0.000003  |
| C | 4.839484  | 0.000084  | 0.000037  |
| H | 4.680914  | 2.150316  | 0.000011  |
| H | 4.680914  | -2.150148 | 0.000054  |
| H | 5.925634  | 0.000084  | 0.000060  |
| C | 0.606903  | 0.000083  | -0.000058 |
| C | -0.606903 | -0.000083 | -0.000058 |
| C | -2.040586 | -0.000084 | -0.000022 |
| C | -2.748722 | 1.212879  | 0.000006  |
| C | -2.748722 | -1.213047 | -0.000020 |
| C | -4.140432 | 1.208108  | 0.000033  |
| H | -2.200056 | 2.150034  | 0.000003  |
| C | -4.140432 | -1.208276 | 0.000010  |
| H | -2.200056 | -2.150201 | -0.000042 |
| C | -4.839484 | -0.000084 | 0.000037  |
| H | -4.680914 | 2.150148  | 0.000054  |
| H | -4.680914 | -2.150316 | 0.000011  |
| H | -5.925634 | -0.000084 | 0.000060  |

**TS-1** (optimized in DCE)

M06-2X SCF energy in DCE: -2131.87485070 a.u.

M06-2X enthalpy in DCE: -2131.561986 a.u.

M06-2X free energy in DCE: -2131.647965 a.u.

M06-2X free energy in DCE after quasi-harmonic correction: -2131.639669 a.u.

Imaginary frequency: -1004.9973 cm<sup>-1</sup>

Cartesian coordinates

S131

| ATOM | X         | Y         | Z         |
|------|-----------|-----------|-----------|
| C    | -1.493253 | -2.134346 | -0.010655 |
| C    | -2.157009 | -2.372219 | 1.214119  |
| C    | -2.147839 | -2.361869 | -1.242337 |
| C    | -3.461396 | -2.838785 | 1.198435  |
| H    | -1.637949 | -2.176108 | 2.147187  |
| C    | -3.452270 | -2.828513 | -1.240498 |
| H    | -1.621639 | -2.158079 | -2.169730 |
| C    | -4.103062 | -3.063393 | -0.024435 |
| H    | -3.986207 | -3.020972 | 2.130464  |
| H    | -3.970003 | -3.002812 | -2.177978 |
| H    | -5.128051 | -3.423031 | -0.029793 |
| C    | -0.171127 | -1.684143 | -0.004795 |
| C    | 0.986182  | -1.199161 | -0.003357 |
| B    | -2.452546 | 1.100911  | -0.006759 |
| F    | -3.720830 | 0.498861  | -0.014103 |
| F    | -1.734678 | 0.708018  | -1.151885 |
| F    | -2.589893 | 2.500304  | -0.003897 |
| F    | -1.745557 | 0.701769  | 1.142947  |
| C    | 0.719369  | 2.181291  | 1.163810  |
| C    | 0.733511  | 2.189313  | -1.130686 |
| C    | 0.489642  | 3.553119  | -1.189849 |
| C    | 0.350472  | 4.227452  | 0.020887  |
| C    | 0.474478  | 3.544807  | 1.228556  |
| H    | 0.411418  | 4.060126  | -2.144245 |
| H    | 0.151395  | 5.294421  | 0.023322  |
| H    | 0.384199  | 4.045512  | 2.185230  |
| N    | 0.832522  | 1.523200  | 0.014932  |
| H    | 0.797367  | 0.065249  | 0.004787  |
| Cl   | 0.943395  | 1.247337  | 2.603501  |



|    |          |           |           |
|----|----------|-----------|-----------|
| Cl | 0.976416 | 1.263548  | -2.573086 |
| C  | 2.399545 | -1.590743 | -0.002068 |
| C  | 3.402562 | -0.619596 | -0.095391 |
| C  | 2.747575 | -2.947057 | 0.090433  |
| C  | 4.743065 | -1.001591 | -0.099185 |
| H  | 3.139975 | 0.432359  | -0.165319 |
| C  | 4.087097 | -3.320442 | 0.087194  |
| H  | 1.965564 | -3.697535 | 0.165814  |
| C  | 5.087436 | -2.349456 | -0.008445 |
| H  | 5.516884 | -0.243452 | -0.173427 |
| H  | 4.351677 | -4.371273 | 0.159174  |
| H  | 6.132426 | -2.644986 | -0.011211 |

**TS-1a** (optimized in DCE)

M06-2X SCF energy in DCE: -2131.87151209 a.u.  
M06-2X enthalpy in DCE: -2131.558930 a.u.  
M06-2X free energy in DCE: -2131.649741 a.u.  
M06-2X free energy in DCE after quasi-harmonic correction: -2131.636975 a.u.  
Imaginary frequency: -728.9253 cm<sup>-1</sup>

Cartesian coordinates

| ATOM | X        | Y         | Z         |
|------|----------|-----------|-----------|
| C    | 1.126706 | -1.576244 | -0.001026 |
| C    | 1.349981 | -2.217664 | 1.235336  |
| C    | 1.383950 | -2.241332 | -1.218174 |
| C    | 1.815589 | -3.523923 | 1.245821  |
| H    | 1.164327 | -1.676881 | 2.158364  |
| C    | 1.850320 | -3.547025 | -1.190665 |

|    |           |           |           |
|----|-----------|-----------|-----------|
| H  | 1.223771  | -1.718380 | -2.156118 |
| C  | 2.064599  | -4.181947 | 0.037004  |
| H  | 1.995347  | -4.029815 | 2.188803  |
| H  | 2.057125  | -4.070412 | -2.118447 |
| H  | 2.436896  | -5.202277 | 0.051952  |
| C  | 0.660393  | -0.251611 | -0.020011 |
| C  | 0.015532  | 0.817943  | -0.035619 |
| B  | 3.959162  | 0.256967  | 0.023593  |
| F  | 4.407667  | -1.072429 | 0.033095  |
| F  | 3.185959  | 0.487557  | -1.132194 |
| F  | 3.162337  | 0.496170  | 1.161458  |
| F  | 5.058778  | 1.130163  | 0.031837  |
| C  | -3.104338 | -0.575178 | 1.163831  |
| C  | -3.100638 | -0.699430 | -1.124867 |
| C  | -4.377281 | -1.240768 | -1.160334 |
| C  | -5.016000 | -1.445962 | 0.060288  |
| C  | -4.380030 | -1.112355 | 1.253755  |
| H  | -4.848275 | -1.489260 | -2.104184 |
| H  | -6.016026 | -1.867082 | 0.081233  |
| H  | -4.852576 | -1.259986 | 2.217774  |
| N  | -2.480830 | -0.376238 | 0.006269  |
| H  | -1.101699 | 0.199677  | -0.022812 |
| Cl | -2.229572 | -0.117562 | 2.587850  |
| Cl | -2.217616 | -0.403937 | -2.585875 |
| C  | -0.030216 | 2.272959  | -0.052148 |
| C  | -1.262721 | 2.934760  | -0.107392 |
| C  | 1.165349  | 3.004396  | -0.012350 |
| C  | -1.299561 | 4.326923  | -0.123518 |
| H  | -2.186332 | 2.361690  | -0.137291 |
| C  | 1.117541  | 4.394711  | -0.028316 |

|   |           |          |           |
|---|-----------|----------|-----------|
| H | 2.113320  | 2.477844 | 0.031451  |
| C | -0.111219 | 5.056891 | -0.083928 |
| H | -2.255322 | 4.840210 | -0.166797 |
| H | 2.042632  | 4.962434 | 0.002814  |
| H | -0.141382 | 6.142530 | -0.096057 |

**102** (optimized in DCE)

M06-2X SCF energy in DCE: -964.41617572 a.u.

M06-2X enthalpy in DCE: -964.178142 a.u.

M06-2X free energy in DCE: -964.247052 a.u.

M06-2X free energy in DCE after quasi-harmonic correction: -964.240557 a.u.

Cartesian coordinates

| ATOM | X         | Y         | Z         |
|------|-----------|-----------|-----------|
| C    | -0.861073 | -1.074337 | -0.009951 |
| C    | -1.438581 | -1.458425 | 1.238886  |
| C    | -1.425431 | -1.519973 | -1.244351 |
| C    | -2.545066 | -2.279959 | 1.240485  |
| H    | -0.997837 | -1.087664 | 2.158792  |
| C    | -2.532809 | -2.339557 | -1.217137 |
| H    | -0.974237 | -1.196125 | -2.176944 |
| C    | -3.084903 | -2.711356 | 0.018839  |
| H    | -3.005691 | -2.582613 | 2.174367  |
| H    | -2.983860 | -2.687870 | -2.139673 |
| H    | -3.962788 | -3.351513 | 0.029792  |
| C    | 0.214324  | -0.241012 | -0.024670 |
| C    | 1.224674  | 0.564588  | -0.037109 |
| B    | -2.300540 | 1.910103  | 0.000692  |
| F    | -3.248879 | 0.874779  | -0.018926 |

|   |           |           |           |
|---|-----------|-----------|-----------|
| F | -1.469411 | 1.805626  | -1.134118 |
| F | -2.948105 | 3.152733  | -0.001659 |
| F | -1.501524 | 1.792391  | 1.156112  |
| H | 0.937519  | 1.622143  | -0.067090 |
| C | 2.662325  | 0.226509  | -0.016157 |
| C | 3.109716  | -1.102102 | 0.002043  |
| C | 3.588228  | 1.275006  | -0.014452 |
| C | 4.473442  | -1.371850 | 0.022813  |
| H | 2.394223  | -1.921048 | -0.000946 |
| C | 4.954097  | 0.997472  | 0.006682  |
| H | 3.235990  | 2.302631  | -0.029073 |
| C | 5.398163  | -0.323682 | 0.025393  |
| H | 4.817199  | -2.401739 | 0.036752  |
| H | 5.668474  | 1.815252  | 0.008338  |
| H | 6.462354  | -0.539679 | 0.041673  |

**102a** (optimized in DCE)

M06-2X SCF energy in DCE: -964.41458078 a.u.  
M06-2X enthalpy in DCE: -964.176562 a.u.  
M06-2X free energy in DCE: -964.244189 a.u.  
M06-2X free energy in DCE after quasi-harmonic correction: -964.2387448 a.u.

Cartesian coordinates

| ATOM | X        | Y         | Z         |
|------|----------|-----------|-----------|
| C    | 1.497944 | -1.425317 | -0.203080 |
| C    | 2.059290 | -1.913449 | 1.018976  |
| C    | 2.289611 | -0.657725 | -1.113352 |
| C    | 3.374433 | -1.629805 | 1.313921  |

|   |           |           |           |
|---|-----------|-----------|-----------|
| H | 1.432689  | -2.487821 | 1.694155  |
| C | 3.605689  | -0.395918 | -0.800072 |
| H | 1.834721  | -0.289195 | -2.026102 |
| C | 4.136563  | -0.874905 | 0.407267  |
| H | 3.820804  | -1.980012 | 2.238041  |
| H | 4.224569  | 0.189410  | -1.471109 |
| H | 5.171914  | -0.652323 | 0.650301  |
| C | 0.180413  | -1.640610 | -0.458396 |
| C | -1.069966 | -1.890100 | -0.674489 |
| B | 0.692856  | 2.090231  | -0.119152 |
| F | 1.836286  | 2.671395  | -0.692078 |
| F | -0.201388 | 3.092407  | 0.287910  |
| F | 0.066150  | 1.259853  | -1.069814 |
| F | 1.069793  | 1.317562  | 0.997377  |
| H | -1.254741 | -2.799438 | -1.257945 |
| C | -2.240205 | -1.107774 | -0.226207 |
| C | -3.504996 | -1.470930 | -0.701322 |
| C | -2.104750 | -0.033435 | 0.663536  |
| C | -4.630296 | -0.754667 | -0.297337 |
| H | -3.602830 | -2.307880 | -1.387462 |
| C | -3.231978 | 0.676379  | 1.061678  |
| H | -1.122556 | 0.247721  | 1.034047  |
| C | -4.495125 | 0.318911  | 0.582175  |
| H | -5.610357 | -1.036837 | -0.670131 |
| H | -3.123706 | 1.512716  | 1.745864  |
| H | -5.372118 | 0.877630  | 0.895757  |

M06-2X SCF energy in DCE: -1167.45510816 a.u.  
M06-2X enthalpy in DCE: -1167.377451 a.u.  
M06-2X free energy in DCE: -1167.416780 a.u.  
M06-2X free energy in DCE after quasi-harmonic correction: -1167.41678 a.u.

Cartesian coordinates

| ATOM | X         | Y         | Z         |
|------|-----------|-----------|-----------|
| C    | 0.000076  | 0.008688  | 1.126415  |
| C    | 0.000076  | 0.008688  | -1.126415 |
| C    | -0.000161 | 1.397277  | -1.204782 |
| C    | -0.000275 | 2.094506  | 0.000000  |
| C    | -0.000161 | 1.397277  | 1.204782  |
| H    | -0.000275 | 1.904281  | -2.162393 |
| H    | -0.000468 | 3.180063  | 0.000000  |
| H    | -0.000275 | 1.904281  | 2.162393  |
| N    | 0.000155  | -0.683456 | 0.000000  |
| Cl   | 0.000076  | -0.930678 | 2.598721  |
| Cl   | 0.000076  | -0.930678 | -2.598721 |

**TS-2** (optimized in DCE)

M06-2X SCF energy in DCE: -964.40696850 a.u.  
M06-2X enthalpy in DCE: -964.169660 a.u.  
M06-2X free energy in DCE: -964.234826 a.u.  
M06-2X free energy in DCE after quasi-harmonic correction: -964.2299108 a.u.  
Imaginary frequency: -319.0149 cm-1

Cartesian coordinates

| ATOM | X | Y | Z |
|------|---|---|---|
|------|---|---|---|

|   |           |           |           |
|---|-----------|-----------|-----------|
| C | 0.767894  | 0.877235  | -0.186249 |
| C | 1.133168  | 1.322112  | 1.103843  |
| C | 1.153116  | 1.597368  | -1.339589 |
| C | 1.863589  | 2.493562  | 1.231883  |
| H | 0.834415  | 0.743744  | 1.972338  |
| C | 1.891632  | 2.759697  | -1.193927 |
| H | 0.867831  | 1.226974  | -2.319558 |
| C | 2.243621  | 3.201731  | 0.087284  |
| H | 2.147783  | 2.853368  | 2.215171  |
| H | 2.197621  | 3.324695  | -2.068171 |
| H | 2.824384  | 4.113495  | 0.194121  |
| C | 0.003606  | -0.290115 | -0.316241 |
| C | -1.066556 | -1.035173 | -0.323925 |
| B | 2.504831  | -1.767134 | 0.128198  |
| F | 3.388755  | -0.738420 | -0.161299 |
| F | 1.346039  | -1.621588 | -0.769341 |
| F | 3.055644  | -3.010420 | -0.133042 |
| F | 2.022419  | -1.675111 | 1.427712  |
| H | -0.951634 | -2.104083 | -0.490333 |
| C | -2.440294 | -0.521333 | -0.127209 |
| C | -3.489208 | -1.444309 | -0.218989 |
| C | -2.723748 | 0.825579  | 0.140460  |
| C | -4.807748 | -1.026880 | -0.047262 |
| H | -3.266734 | -2.487665 | -0.425712 |
| C | -4.041473 | 1.236309  | 0.311186  |
| H | -1.919828 | 1.552626  | 0.218597  |
| C | -5.086204 | 0.312932  | 0.217851  |
| H | -5.614480 | -1.750063 | -0.120425 |
| H | -4.254490 | 2.280600  | 0.519166  |
| H | -6.113113 | 0.639540  | 0.352861  |

TS-2a (optimized in DCE)

M06-2X SCF energy in DCE: -964.40586170 a.u.  
M06-2X enthalpy in DCE: -964.168836 a.u.  
M06-2X free energy in DCE: -964.232826 a.u.  
M06-2X free energy in DCE after quasi-harmonic correction: -964.2287611 a.u.  
Imaginary frequency: -321.5740 cm-1

Cartesian coordinates

| ATOM | X         | Y         | Z         |
|------|-----------|-----------|-----------|
| C    | 1.719640  | -0.984530 | 0.051822  |
| C    | 2.399066  | -0.747586 | 1.265655  |
| C    | 2.431676  | -1.206018 | -1.147125 |
| C    | 3.786084  | -0.759340 | 1.277152  |
| H    | 1.828324  | -0.561145 | 2.169746  |
| C    | 3.816160  | -1.205521 | -1.120429 |
| H    | 1.884378  | -1.366791 | -2.071002 |
| C    | 4.486751  | -0.982050 | 0.088257  |
| H    | 4.323975  | -0.585135 | 2.203146  |
| H    | 4.379095  | -1.373641 | -2.032570 |
| H    | 5.572997  | -0.979495 | 0.101436  |
| C    | 0.314707  | -0.977091 | 0.039311  |
| C    | -0.869375 | -1.469348 | 0.246756  |
| B    | 0.589447  | 1.949625  | -0.175351 |
| F    | -0.025390 | 0.766832  | -0.792408 |
| F    | 1.904402  | 2.019384  | -0.609680 |
| F    | -0.150424 | 3.047001  | -0.584760 |
| F    | 0.517452  | 1.766835  | 1.202888  |

S140



|   |           |           |           |
|---|-----------|-----------|-----------|
| H | -0.755670 | -2.519408 | 0.548294  |
| C | -2.245820 | -0.951138 | 0.149661  |
| C | -2.575240 | 0.372486  | 0.466518  |
| C | -3.252779 | -1.849520 | -0.226037 |
| C | -3.899768 | 0.793063  | 0.379489  |
| H | -1.806150 | 1.061237  | 0.796780  |
| C | -4.573496 | -1.418579 | -0.323141 |
| H | -2.996342 | -2.881904 | -0.448713 |
| C | -4.898436 | -0.095612 | -0.022412 |
| H | -4.150938 | 1.819414  | 0.629903  |
| H | -5.347328 | -2.117428 | -0.626178 |
| H | -5.928947 | 0.240400  | -0.091314 |

**E-81** (optimized in DCE)

M06-2X SCF energy in DCE: -639.85890833 a.u.  
M06-2X enthalpy in DCE: -639.637213 a.u.  
M06-2X free energy in DCE: -639.689786 a.u.  
M06-2X free energy in DCE after quasi-harmonic correction: -639.6875768 a.u.

Cartesian coordinates

| ATOM | X         | Y         | Z         |
|------|-----------|-----------|-----------|
| C    | -1.536071 | 0.405861  | -0.099797 |
| C    | -1.192460 | -0.678741 | -0.917563 |
| C    | -2.733126 | 0.371569  | 0.626792  |
| C    | -2.024134 | -1.793069 | -0.984927 |
| H    | -0.279295 | -0.643441 | -1.505029 |
| C    | -3.562056 | -0.746634 | 0.557174  |
| H    | -3.009093 | 1.216391  | 1.251343  |

|   |           |           |           |
|---|-----------|-----------|-----------|
| C | -3.207678 | -1.832027 | -0.244477 |
| H | -1.753074 | -2.628477 | -1.623824 |
| H | -4.484654 | -0.769148 | 1.129732  |
| H | -3.855009 | -2.702552 | -0.299108 |
| C | -0.669254 | 1.595229  | -0.021376 |
| C | 0.659979  | 1.725827  | 0.001465  |
| F | -1.398696 | 2.750900  | 0.010627  |
| H | 1.042810  | 2.743993  | -0.042787 |
| C | 1.658778  | 0.642887  | 0.092064  |
| C | 1.473446  | -0.482609 | 0.909323  |
| C | 2.860332  | 0.765451  | -0.620243 |
| C | 2.450161  | -1.472558 | 0.983266  |
| H | 0.564638  | -0.576454 | 1.497840  |
| C | 3.837478  | -0.226458 | -0.547196 |
| H | 3.024035  | 1.643954  | -1.239930 |
| C | 3.633430  | -1.352101 | 0.251013  |
| H | 2.291078  | -2.336536 | 1.622461  |
| H | 4.759185  | -0.117057 | -1.111738 |
| H | 4.394695  | -2.124536 | 0.312293  |

**Z-71** (optimized in DCE)

M06-2X SCF energy in DCE: -639.86286416 a.u.  
M06-2X enthalpy in DCE: -639.640694 a.u.  
M06-2X free energy in DCE: -639.694316 a.u.  
M06-2X free energy in DCE after quasi-harmonic correction: -639.6910937 a.u.

Cartesian coordinates

| ATOM | X | Y | Z |
|------|---|---|---|
|------|---|---|---|

S142

|   |           |           |           |
|---|-----------|-----------|-----------|
| C | -1.943630 | -0.075727 | -0.022660 |
| C | -2.845166 | -1.112782 | 0.256239  |
| C | -2.443043 | 1.209329  | -0.287516 |
| C | -4.216476 | -0.864961 | 0.286716  |
| H | -2.473715 | -2.112465 | 0.456146  |
| C | -3.812386 | 1.450900  | -0.252568 |
| H | -1.766050 | 2.020270  | -0.538694 |
| C | -4.705431 | 0.416147  | 0.036113  |
| H | -4.902227 | -1.677595 | 0.508135  |
| H | -4.184786 | 2.449345  | -0.462497 |
| H | -5.774153 | 0.608119  | 0.058323  |
| C | -0.499075 | -0.353689 | -0.032913 |
| C | 0.513369  | 0.520692  | 0.033650  |
| F | -0.229478 | -1.684231 | -0.095115 |
| H | 0.224068  | 1.563161  | 0.129737  |
| C | 1.959816  | 0.272608  | 0.017871  |
| C | 2.557658  | -0.982044 | -0.204343 |
| C | 2.801832  | 1.378949  | 0.232200  |
| C | 3.944722  | -1.113049 | -0.204380 |
| H | 1.946075  | -1.857689 | -0.383444 |
| C | 4.187112  | 1.243886  | 0.233787  |
| H | 2.355348  | 2.356087  | 0.400218  |
| C | 4.766486  | -0.006584 | 0.015870  |
| H | 4.386100  | -2.090248 | -0.379588 |
| H | 4.813031  | 2.115280  | 0.404189  |
| H | 5.846885  | -0.118212 | 0.015108  |

M06-2X SCF energy in DCE: -324.56306263 a.u.  
M06-2X enthalpy in DCE: -324.546476 a.u.  
M06-2X free energy in DCE: -324.577164 a.u.  
M06-2X free energy in DCE after quasi-harmonic correction: -324.5771643 a.u.

Cartesian coordinates

| ATOM | X         | Y         | Z         |
|------|-----------|-----------|-----------|
| B    | 0.000042  | -0.000047 | -0.000150 |
| F    | -0.458337 | -1.236108 | 0.000028  |
| F    | 1.299718  | 0.221162  | 0.000028  |
| F    | -0.841404 | 1.014973  | 0.000028  |

**H2O** (optimized in DCE)

M06-2X SCF energy in DCE: -76.42887078 a.u.  
M06-2X enthalpy in DCE: -76.404022 a.u.  
M06-2X free energy in DCE: -76.425467 a.u.  
M06-2X free energy in DCE after quasi-harmonic correction: -76.425467 a.u.

Cartesian coordinates

| ATOM | X        | Y         | Z         |
|------|----------|-----------|-----------|
| O    | 0.000000 | 0.000000  | 0.117933  |
| H    | 0.000000 | 0.770127  | -0.471733 |
| H    | 0.000000 | -0.770127 | -0.471733 |

**BF3-H2O** (optimized in DCE)

M06-2X SCF energy in DCE: -401.02217209 a.u.  
M06-2X enthalpy in DCE: -400.977854 a.u.  
S144

M06-2X free energy in DCE: -401.012686 a.u.

M06-2X free energy in DCE after quasi-harmonic correction: -401.0126861 a.u.

#### Cartesian coordinates

| ATOM | X         | Y         | Z         |
|------|-----------|-----------|-----------|
| B    | -0.182457 | 0.000104  | 0.002762  |
| F    | -0.572835 | -1.152027 | -0.626452 |
| F    | -0.426534 | -0.003286 | 1.354724  |
| F    | -0.570745 | 1.156225  | -0.620464 |
| O    | 1.416157  | -0.000752 | -0.173999 |
| H    | 1.857619  | 0.790692  | 0.204539  |
| H    | 1.856440  | -0.793408 | 0.203371  |

## 11. References

- [1] Zhao, Y., Jiang, F. & Hu, J. Spontaneous Resolution of Julia-Kocienski Intermediates Facilitates Phase Separation to Produce Z- and E-Monofluoroalkenes. *J. Am. Chem. Soc.* **137**, 5199–5203 (2015).
- [2] Gauthier, R., Mamone, M. & Paquin, J.-F. Gold-Catalyzed Hydrofluorination of Internal Alkynes Using Aqueous HF. *Org. Lett.* **21**, 9024–9027 (2019).
- [3] Dolenc, D. & Šket, B. Chlorofluorination of Alkenes and Alkynes Using a New Reagent N-Chlorosaccharin - HF/Pyridine System. *Synlett* **4**, 327-328 (1995).
- [4] Eddartr, S., Mestdagh, H. & Rolando, C. Synthesis of fluorinated enynes and dienes via 1-bromo 2-fluoro alkenes. *Tetrahedron Letters* **32**, 69-72 (1991).
- [5] Pfeifer, L. & Gouverneur, V. Controlled Single and Double Iodofluorination of Alkynes with DIH and HF-Based Reagents. *Org. Lett.* **20**, 1576–1579 (2018).
- [6] Metternich, J. B. & Gilmour, R. A Bio-Inspired, Catalytic E → Z Isomerization of Activated Olefins. *J. Am. Chem. Soc.* **137**, 11254–11257 (2015).
- [7] Lu, Z., Bajwa, B. S., Liu, S., Lee, S., Hammond, G. B. & Xu, B. Solventless and metal-free regioselective hydrofluorination of functionalized alkynes and allenes: an efficient protocol for the synthesis of gem-difluorides. *Green Chem.*, **21**, 1467-1471 (2019).
- [8] Rosen, T. C., Yoshida, S., Fröhlich, R., Kirk, K. L. & Haufe, G. Fluorinated Phenylcyclopropylamines. 2. Effects of Aromatic Ring Substitution and of Absolute Configuration on Inhibition of Microbial Tyramine Oxidase. *J. Med. Chem.* **47**, 5860-5871 (2004).
- [9] Heitz, W. & Knebelkamp, A. Synthesis of fluorostyrenes via palladium-catalyzed reactions of aromatic halides with fluoroolefins. *Makromol. Chem., Rapid Commun.* **12**, 69-75 (1991).
- [10] Knebelkamp, A. & Heitz, W. Synthesis and properties of poly(α-fluorostyrene)s. *Makromol.*

*Chem., Rapid Commun.* **12**, 597–606 (1991).

[11] Mandal, S. K., Ghosh, A. K., Kumar, R. & Zaje, B. Expedient synthesis of  $\alpha$ -substituted fluoroethenes. *Org. Biomol. Chem.*, **10**, 3164–3167 (2012).

[12] Thomson, C. J., Zhang, Q., Al-Maharik, N., Buhl, M., Cordes, D. B., Slawin, A. M. Z. & O'Hagan, D. Fluorinated cyclopropanes: synthesis and chemistry of the aryl a,b,b-trifluorocyclopropane motif. *Chem. Commun.*, **54**, 8415–8418 (2018).

[13] Okoromoba, O. E., Han, J., Hammond, G. B. & Xu, B. Designer HF-Based Fluorination Reagent: Highly Regioselective Synthesis of Fluoroalkenes and gem-Difluoromethylene Compounds from Alkynes. *J. Am. Chem. Soc.* **136**, 14381–14384 (2014).

[14] Qiu, J., Gyorokos, A., Tarasow, T. M. & Guiles, J. Grignard Cross-Coupling Amenable to Large Scale Production of  $\alpha$ -Fluorostyryl and  $\alpha$ -Fluorovinylthiophenes. *J. Org. Chem.* **73**, 9775–9777 (2008).

[15] Mandal, D., Gupta, R. & Young, R. D. Selective Monodefluorination and Wittig Functionalization of gem-Difluoromethyl Groups to Generate Monofluoroalkenes. *J. Am. Chem. Soc.* **140**, 10682–10686 (2018).

[16] Thornbury, R. T. & Toste, F. D. Palladium-Catalyzed Defluorinative Coupling of 1-Aryl-2,2-Difluoroalkenes and Boronic Acids: Stereoselective Synthesis of Monofluorostilbenes. *Angew. Chem. Int. Ed.* **55**, 11629–11632 (2016).

[17] Shintani, S., Furukawa, Y., Yokokoji, O., Myajima, T., Ko, H., Machida, K. Jpn. Kokai Tokkyo Koho (1993), JP 05070382 A 19930323.

[18] Wong, O. A. & Shi, Y. Asymmetric Epoxidation of Fluoroolefins by Chiral Dioxirane. Fluorine Effect on Enantioselectivity. *J. Org. Chem.* **74**, 8377–8380 (2009).

[19] Kasten, K., Slawin, A. M. Z. & Smith, A. D. Enantioselective Synthesis of  $\beta$ -Fluoro- $\beta$ -aryl- $\alpha$ -aminopentenamides by Organocatalytic [2,3]-Sigmatropic Rearrangement. *Org. Lett.* **19**, 5182–5185 (2017).

[20] O'Connor, T. J. & Toste, F. D. Gold-Catalyzed Hydrofluorination of Electron-Deficient Alkynes: Stereoselective Synthesis of  $\beta$ -Fluoro Michael Acceptors. *ACS Catal.* **8**, 5947–5951 (2018).

[21] Frisch, M. J., Trucks, G. W., Schlegel, H. B., Scuseria, G. E., Robb, M. A., Cheeseman, J. R., Scalmani, G., Barone, V., Mennucci, B., Petersson, G. A., Nakatsuji, H., Caricato, M., Li, X., Hratchian, H. P., Izmaylov, A. F., Bloino, J., Zheng, G., Sonnenberg, J. L., Hada, M., Ehara, M., Toyota, K., Fukuda, R., Hasegawa, J., Ishida, M., Nakajima, T., Honda, Y., Kitao, O., Nakai, H., Vreven, T., Montgomery, J. A., Jr., Peralta, J. E., Ogliaro, F., Bearpark, M., Heyd, J. J., Brothers, E., Kudin, K. N., Staroverov, V. N., Kobayashi, R., Normand, J., Raghavachari, K., Rendell, A., Burant, J. C., Iyengar, S. S., Tomasi, J., Cossi, M., Rega, N., Millam, N. J., Klene, M., Knox, J. E., Cross, J. B., Bakken, V., Adamo, C., Jaramillo, J., Gomperts, R., Stratmann, R. E., Yazyev, O., Austin, A. J., Cammi, R., Pomelli, C., Ochterski, J. W., Martin, R. L., Morokuma, K., Zakrzewski, V. G., Voth, G. A., Salvador, P., Dannenberg, J. J., Dapprich, S., Daniels, A. D., Farkas, O., Foresman, J. B., Ortiz, J. V., Cioslowski, J., Fox, D. J. *Gaussian 16*, Revision A.03, Gaussian, Inc.: Wallingford, CT, 2016.

[22] Towns, J., Cockerill, T., Dahan, M., Foster, I., Gaither, K., Grimshaw, A., Hazlewood, V., Lathrop, S., Lifka, D., Peterson, G. D., Roskies, R., Scott, J. R., Wilkins-Diehr, N. XSEDE: Accelerating Scientific Discovery. *Computing in Science & Engineering* **16**, 62–74 (2014).

[23] Marenich, A. V., Cramer, C. J., Truhlar, D. G. Universal solvation model based on solute electron density and on a continuum model of the solvent defined by the bulk dielectric constant and atomic surface tensions. *J. Phys. Chem. B* **113**, 6378–6396 (2009).

[24] Zhao, Y., Truhlar, D. G. The M06 suite of density functionals for main group thermochemistry,

thermochemical kinetics, noncovalent interactions, excited states, and transition elements: two new functionals and systematic testing of four M06-class functionals and 12 other functionals. *Theor. Chem. Acc.* **120**, 215-241 (2007).

[25] Ribeiro, R. F., Marenich, A. V., Cramer, C. J., Truhlar, D. G. Use of solution-phase vibrational frequencies in continuum models for the free energy of solvation, *J. Phys. Chem. B* **115**, 14556-14562 (2011).

[26] Funes-Ardoiz, I., Paton, R. S. *GoodVibes: GoodVibes* v1.0.2. <http://doi.org/10.5281/zenodo.595246>, 2016.

## 12. Copies of NMR Spectra

<sup>1</sup>H NMR (500 MHz, DMSO)

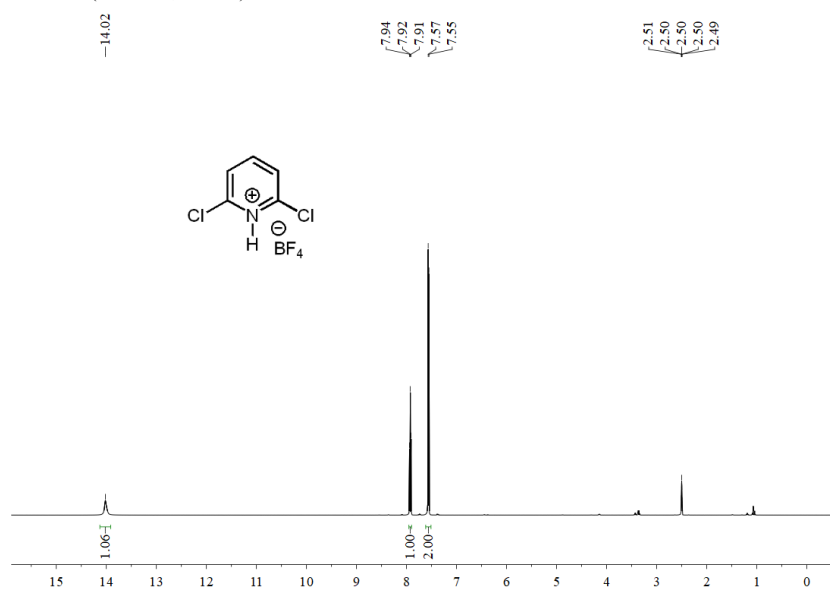

<sup>13</sup>C NMR (126 MHz, DMSO)

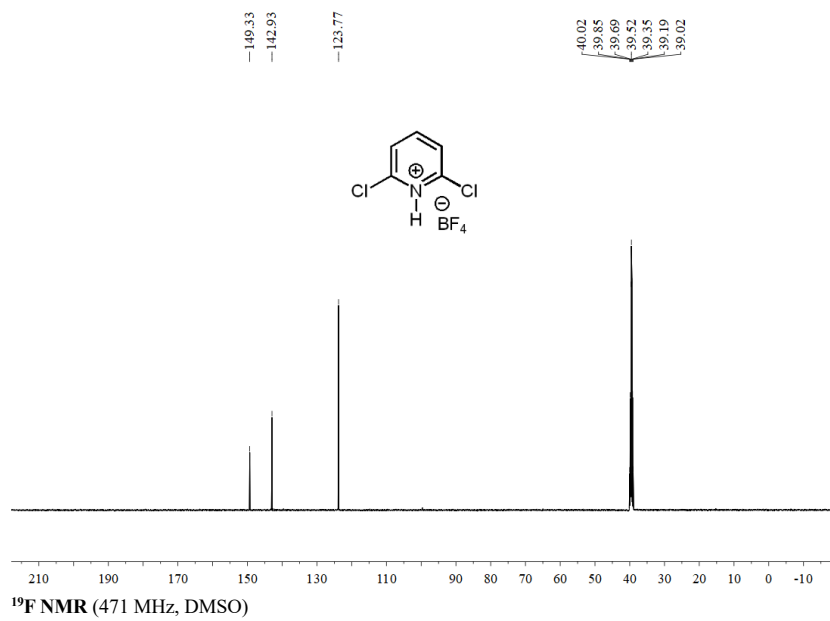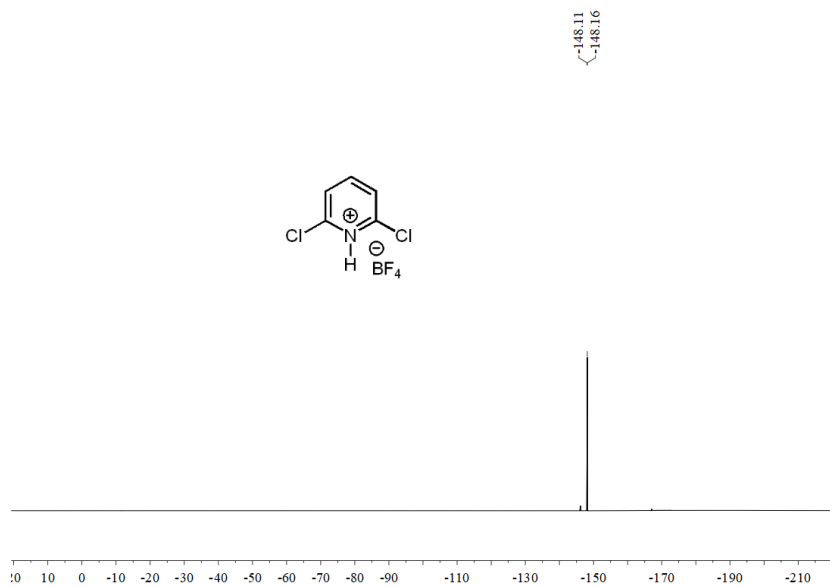



**<sup>1</sup>H NMR (400 MHz, CDCl<sub>3</sub>)**

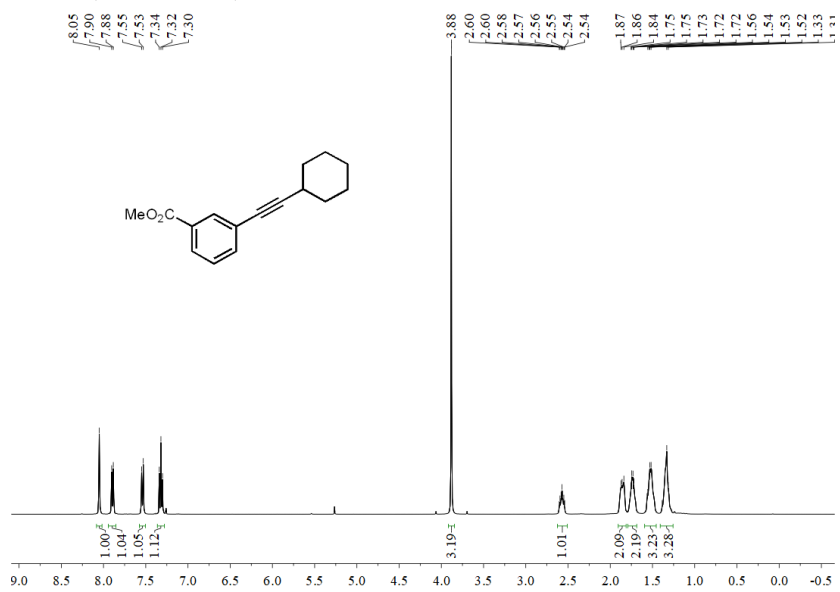

**<sup>13</sup>C NMR (101 MHz, CDCl<sub>3</sub>)**

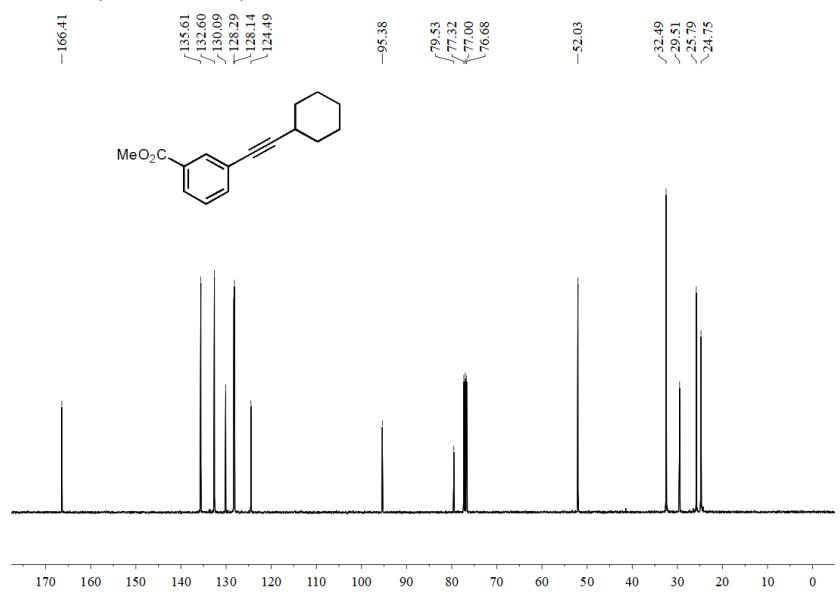

**<sup>1</sup>H NMR (500 MHz, CDCl<sub>3</sub>)**

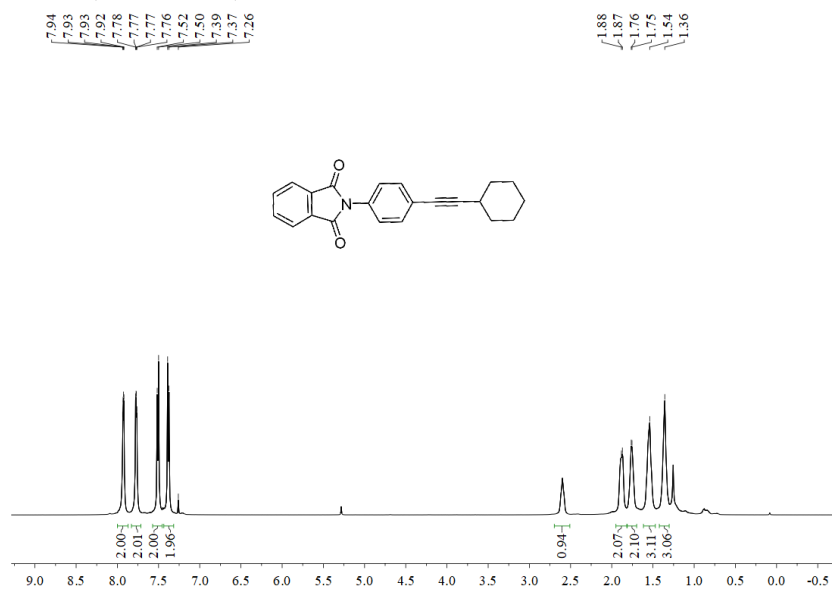

**<sup>13</sup>C NMR (126 MHz, CDCl<sub>3</sub>)**

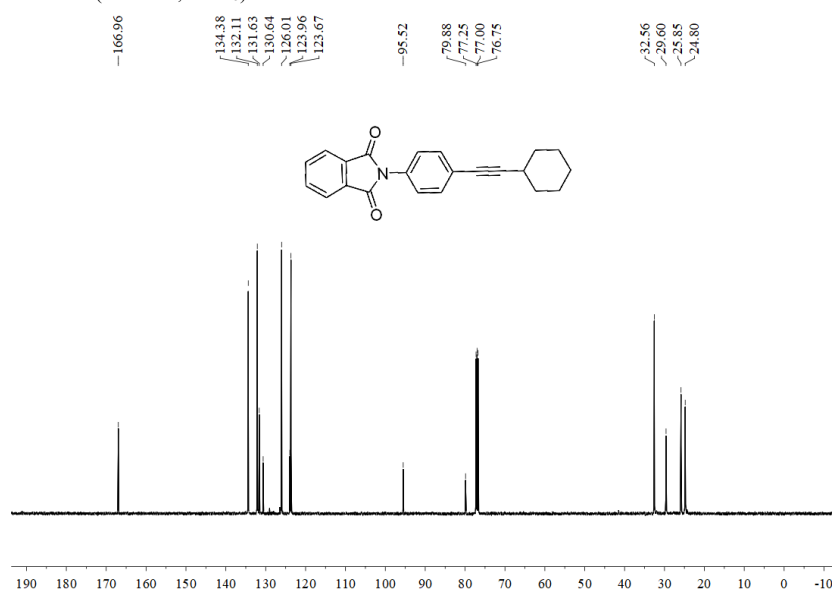

**<sup>1</sup>H NMR (400 MHz, CDCl<sub>3</sub>)**

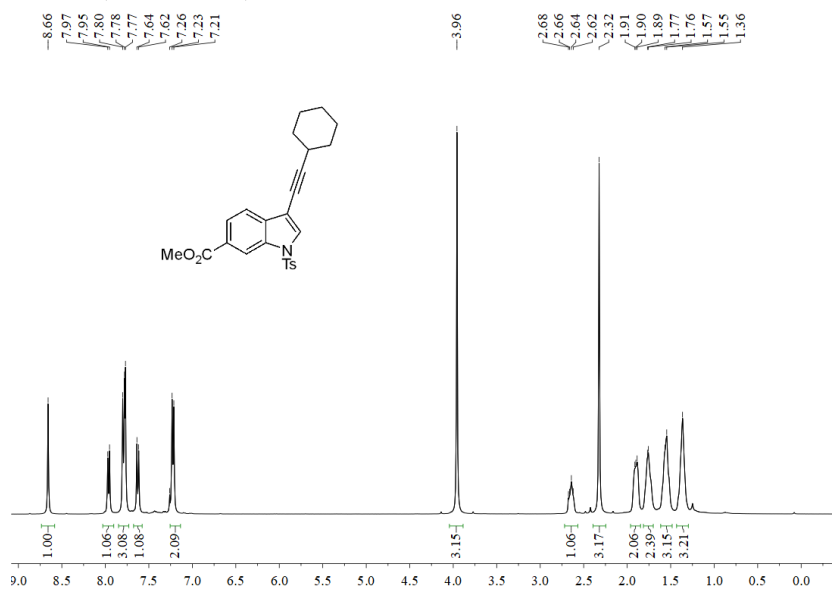

**<sup>13</sup>C NMR (101 MHz, CDCl<sub>3</sub>)**

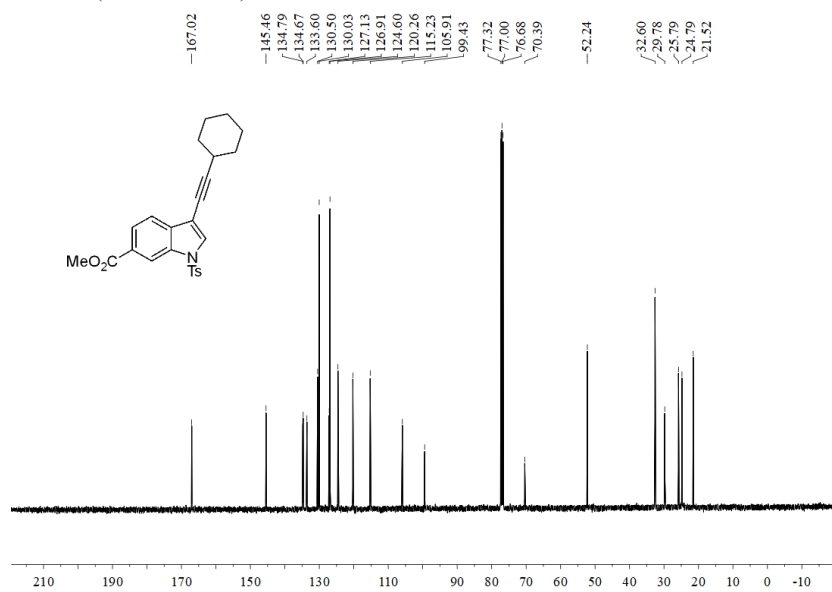

**<sup>1</sup>H NMR (400 MHz, CDCl<sub>3</sub>)**

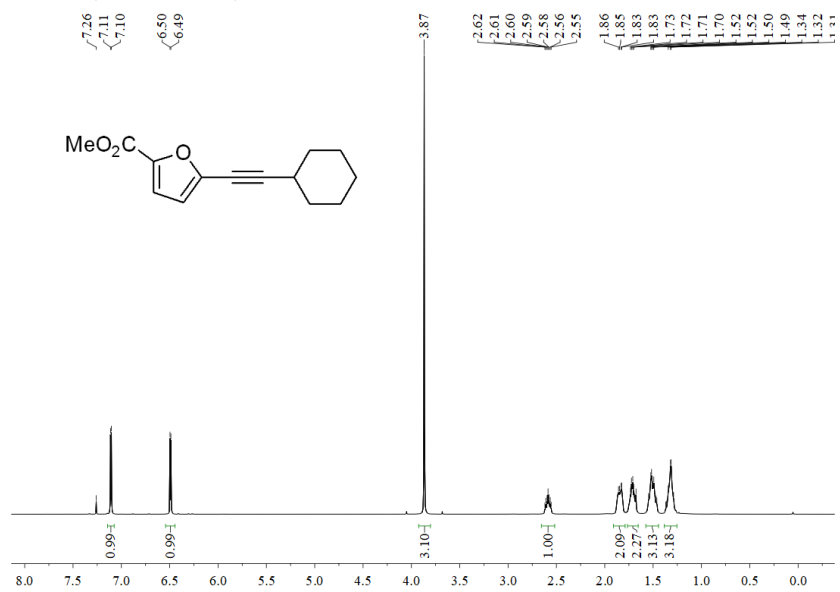

**<sup>13</sup>C NMR (101 MHz, CDCl<sub>3</sub>)**

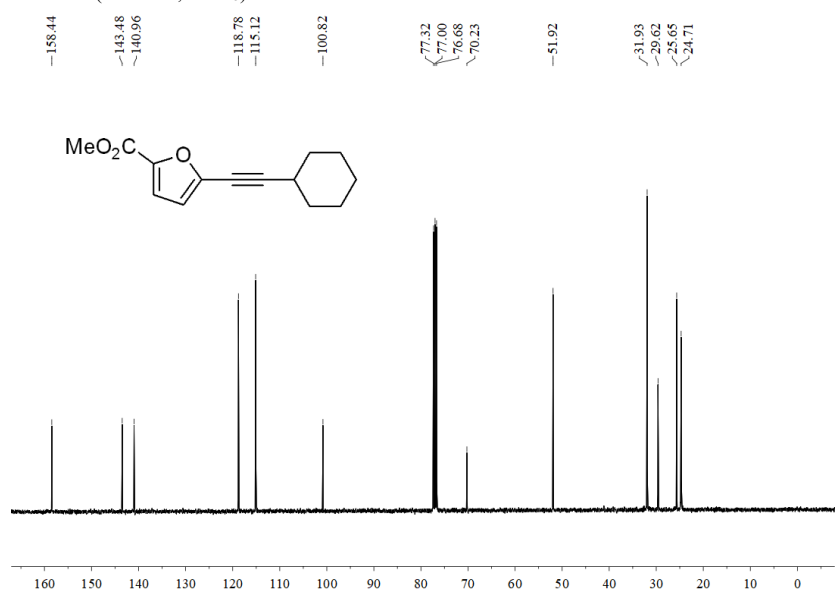

**<sup>1</sup>H NMR (400 MHz, CDCl<sub>3</sub>)**

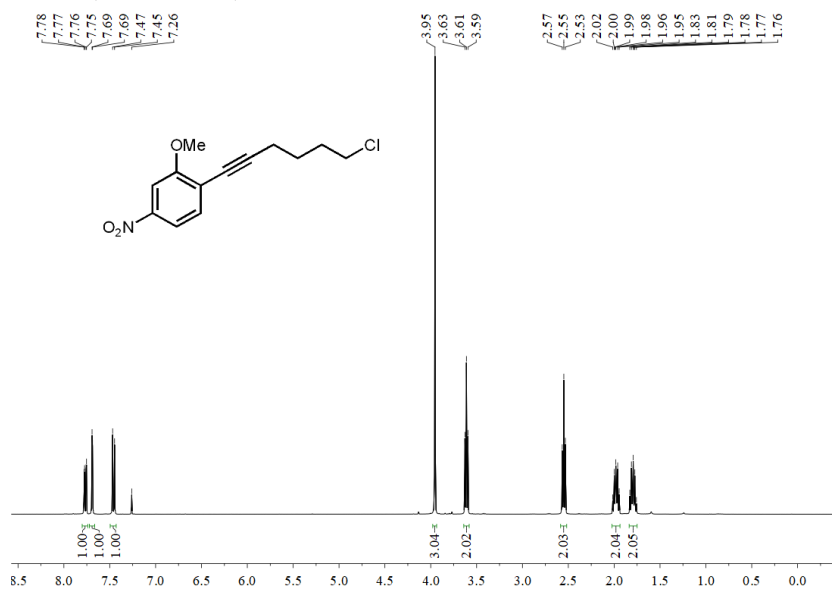

**<sup>13</sup>C NMR (101 MHz, CDCl<sub>3</sub>)**

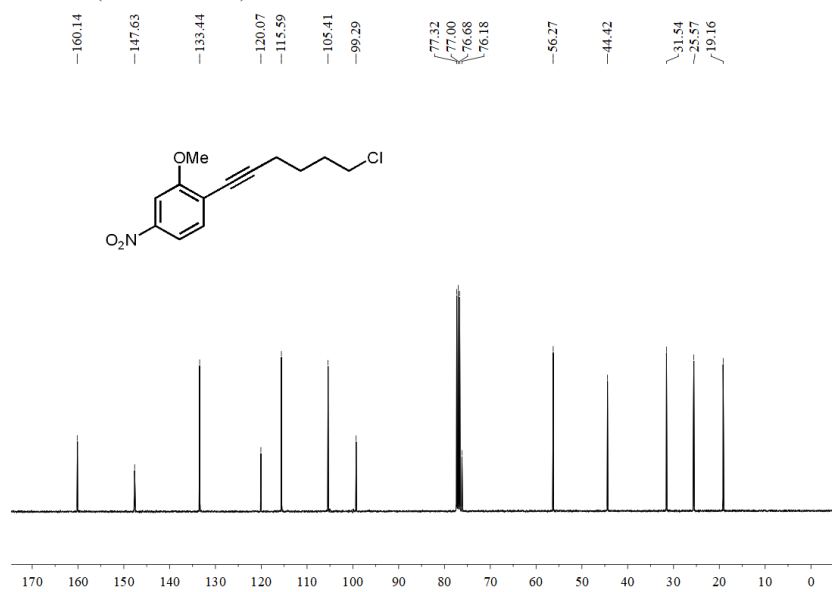

**<sup>1</sup>H NMR (500 MHz, CDCl<sub>3</sub>)**

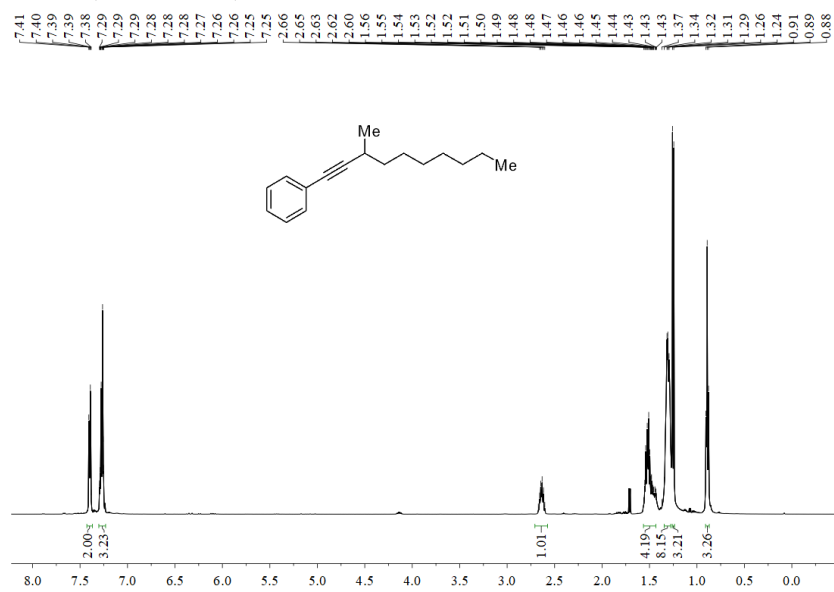

**<sup>13</sup>C NMR (126 MHz, CDCl<sub>3</sub>)**

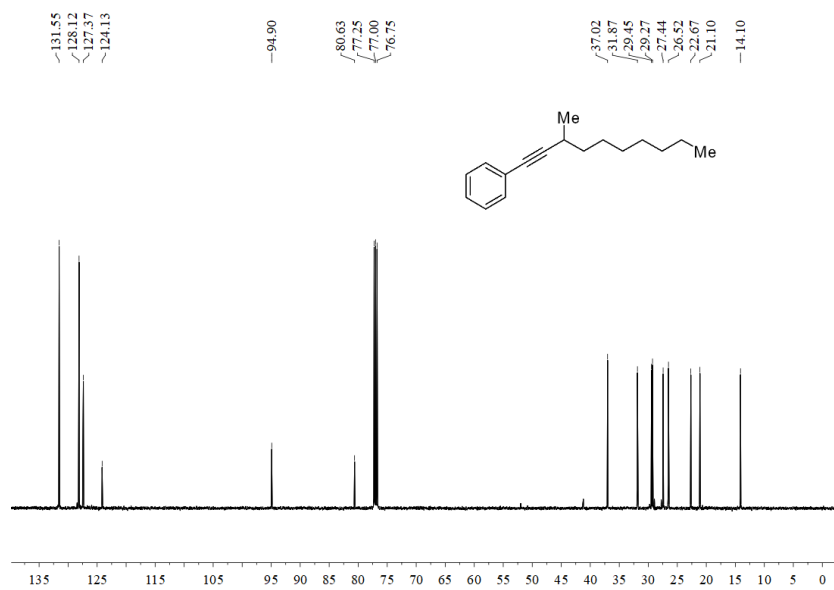

**<sup>1</sup>H NMR (400 MHz, CDCl<sub>3</sub>)**

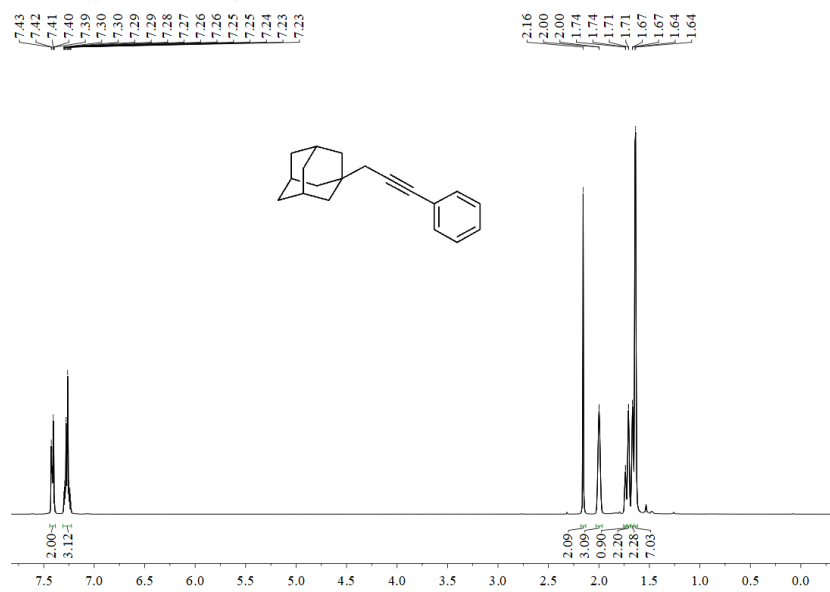

**<sup>13</sup>C NMR (101 MHz, CDCl<sub>3</sub>)**

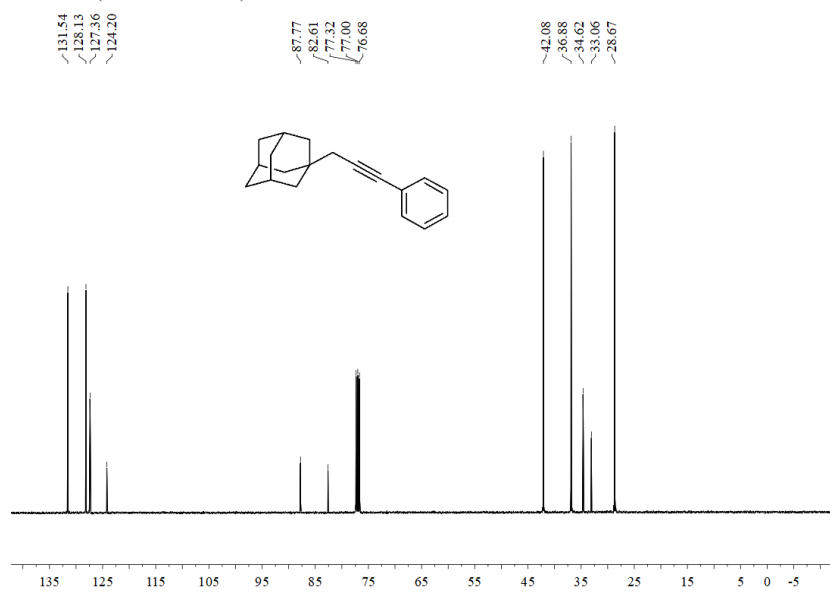

**<sup>1</sup>H NMR (400 MHz, CDCl<sub>3</sub>)**

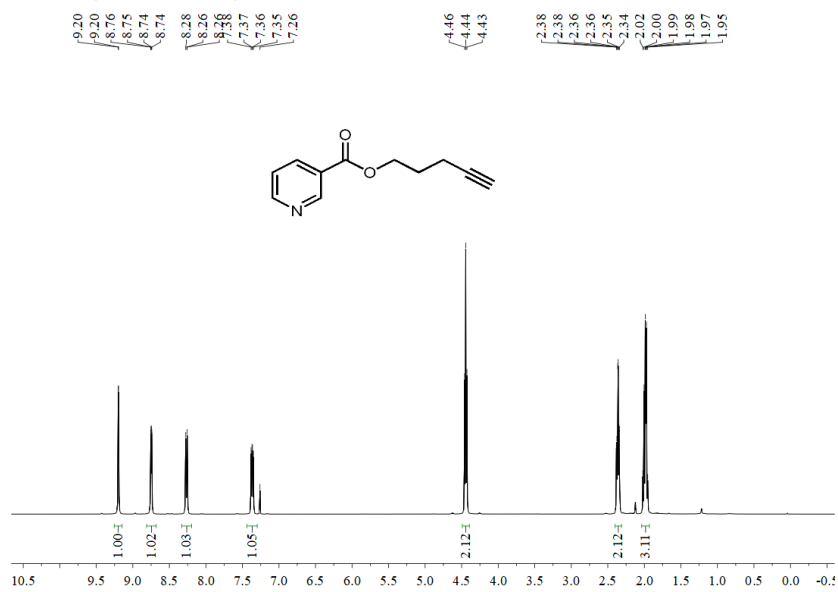

**<sup>13</sup>C NMR (101 MHz, CDCl<sub>3</sub>)**

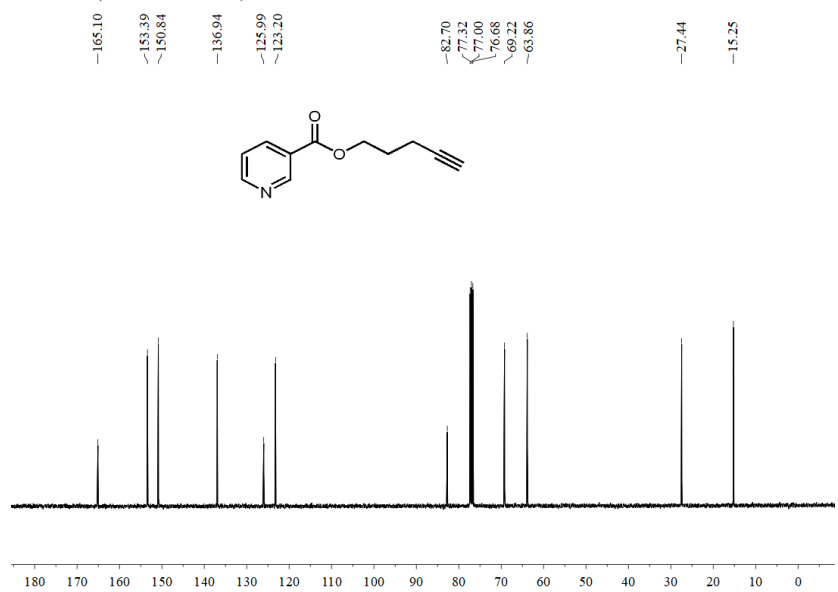



**<sup>1</sup>H NMR (400 MHz, CDCl<sub>3</sub>)**

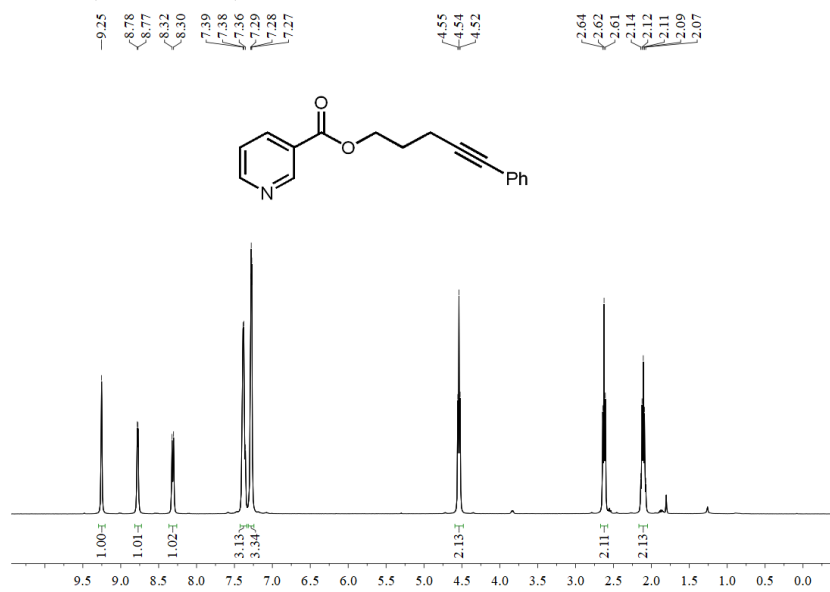

**<sup>13</sup>C NMR (101 MHz, CDCl<sub>3</sub>)**

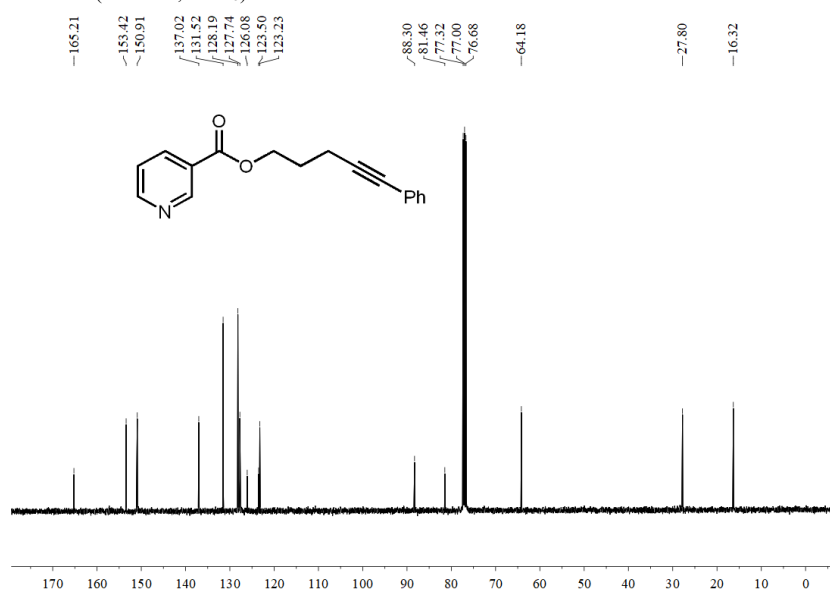

**<sup>1</sup>H NMR (400 MHz, CDCl<sub>3</sub>)**

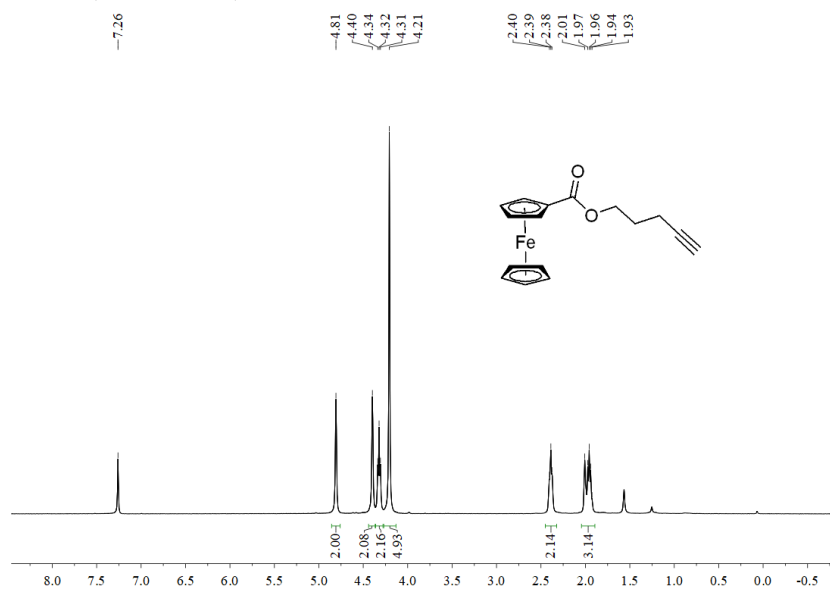

**<sup>13</sup>C NMR (101 MHz, CDCl<sub>3</sub>)**

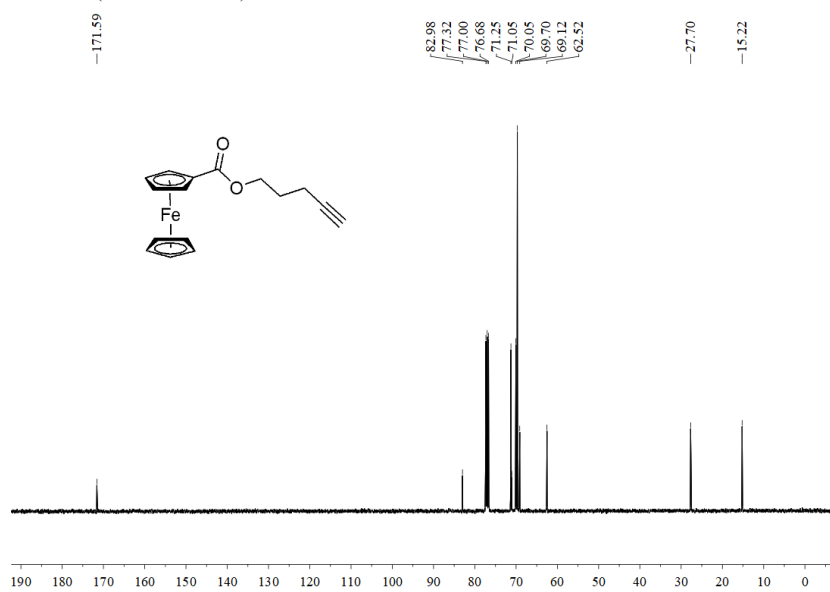

**<sup>1</sup>H NMR (400 MHz, CDCl<sub>3</sub>)**

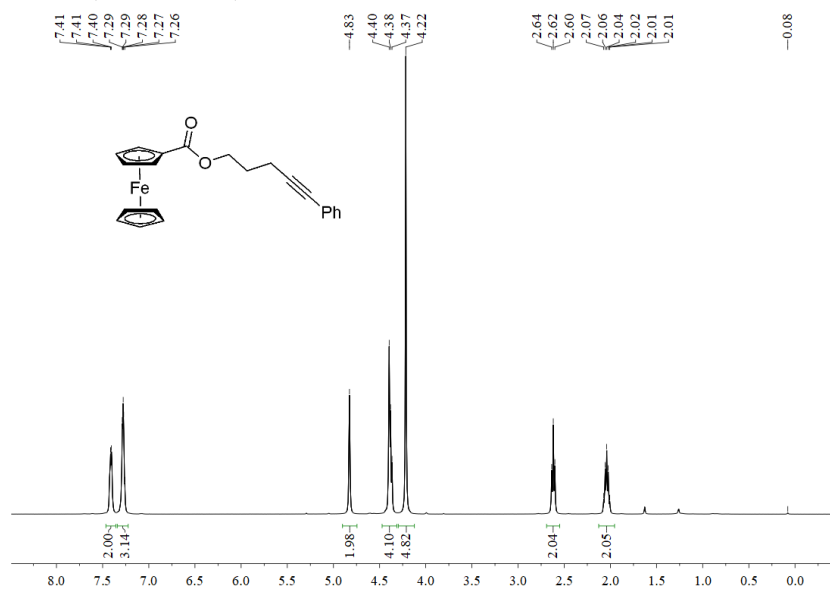

**<sup>13</sup>C NMR (101 MHz, CDCl<sub>3</sub>)**

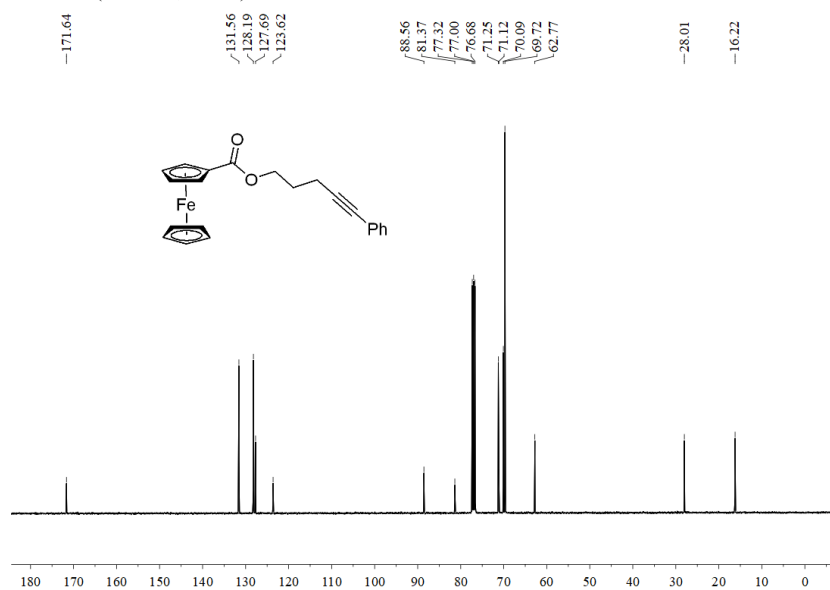

**<sup>1</sup>H NMR (400 MHz, CDCl<sub>3</sub>)**

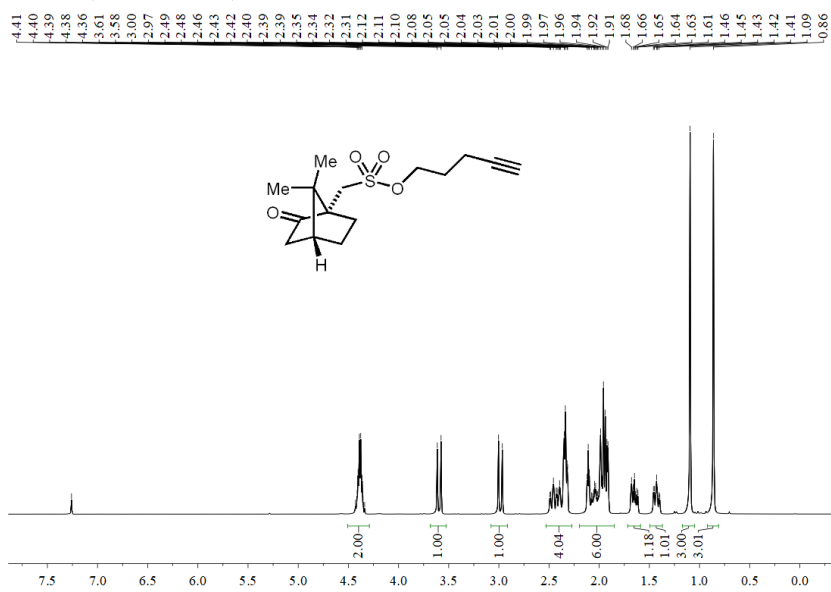

**<sup>13</sup>C NMR (101 MHz, CDCl<sub>3</sub>)**

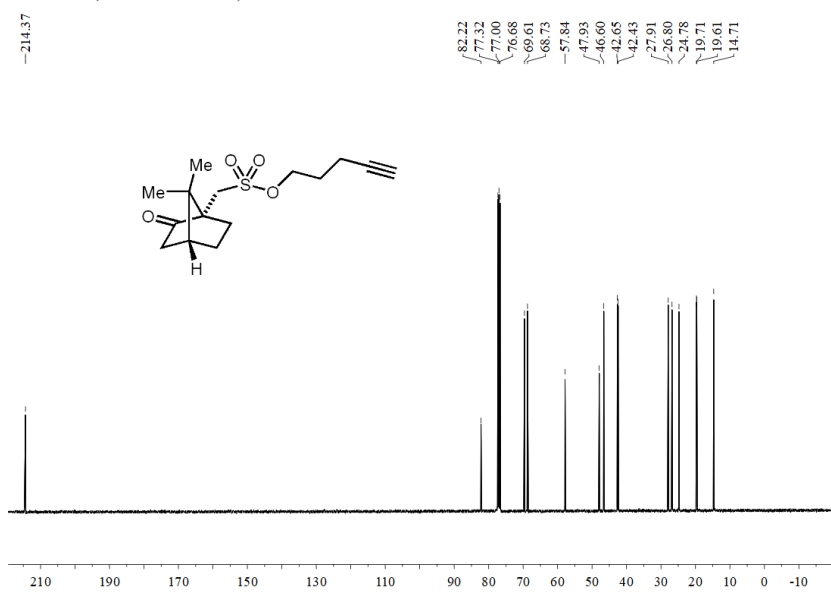

**<sup>1</sup>H NMR (400 MHz, CDCl<sub>3</sub>)**

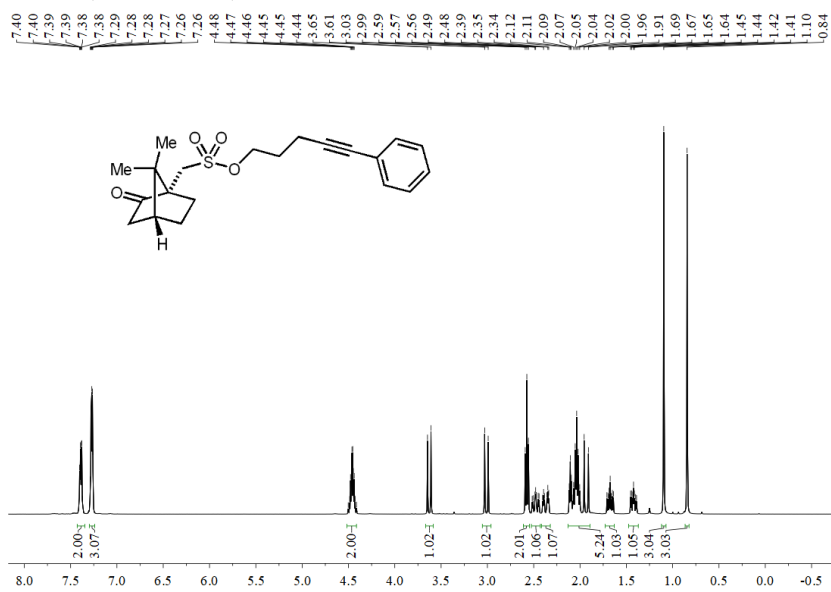

**<sup>13</sup>C NMR (101 MHz, CDCl<sub>3</sub>)**

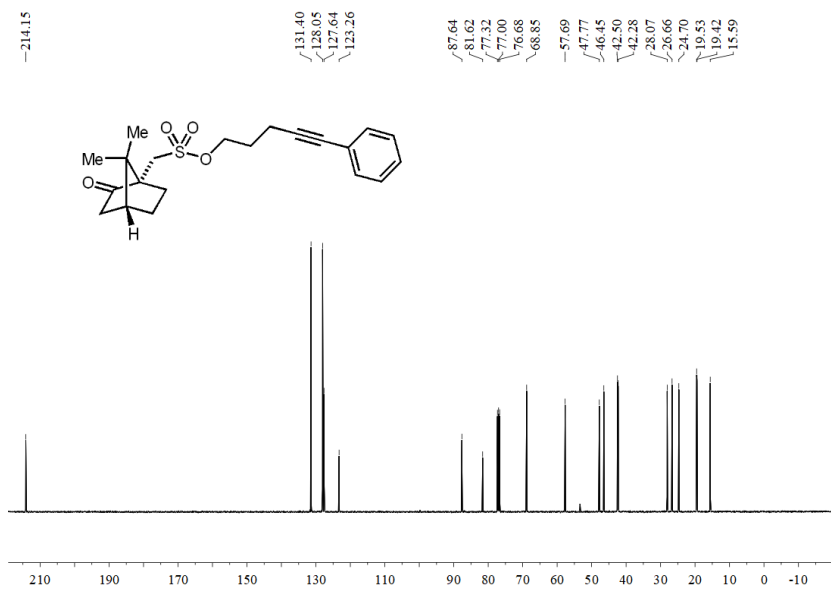

**<sup>1</sup>H NMR (400 MHz, CDCl<sub>3</sub>)**

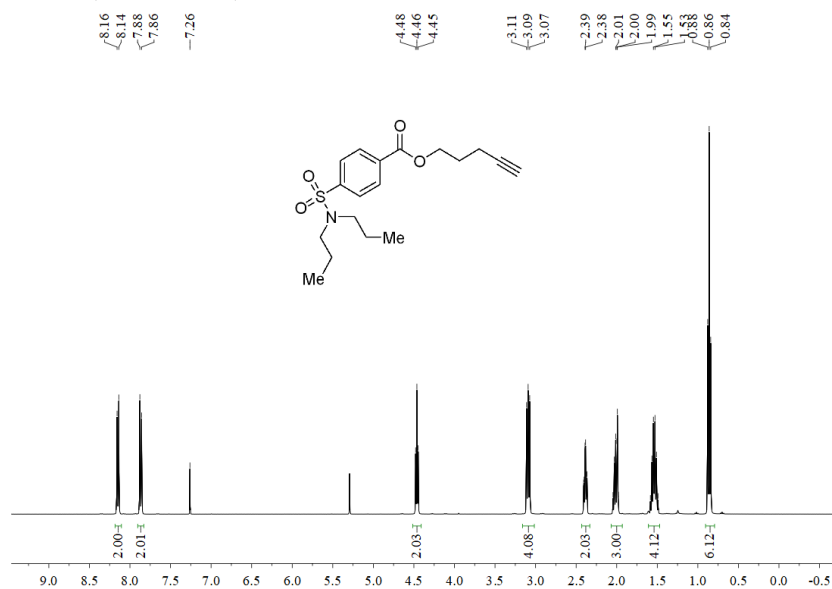

**<sup>13</sup>C NMR (101 MHz, CDCl<sub>3</sub>)**

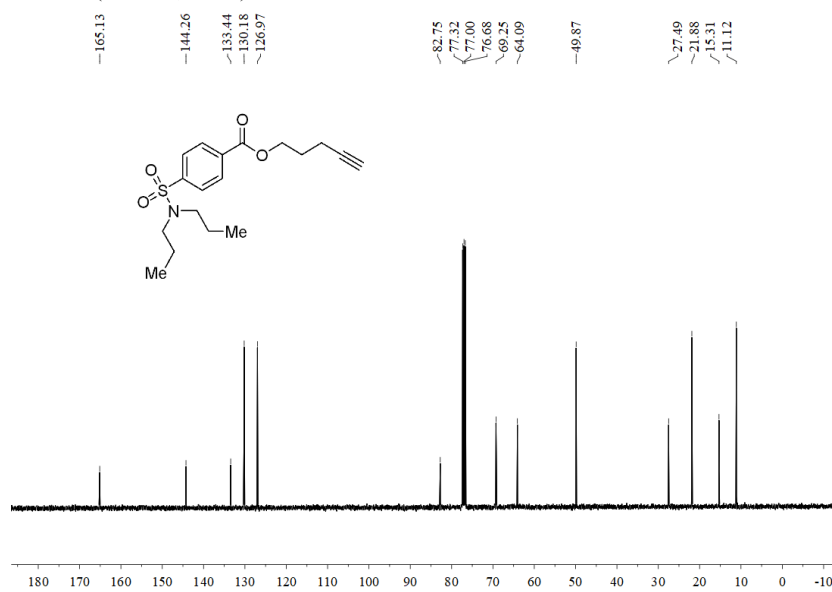

**<sup>1</sup>H NMR (400 MHz, CDCl<sub>3</sub>)**

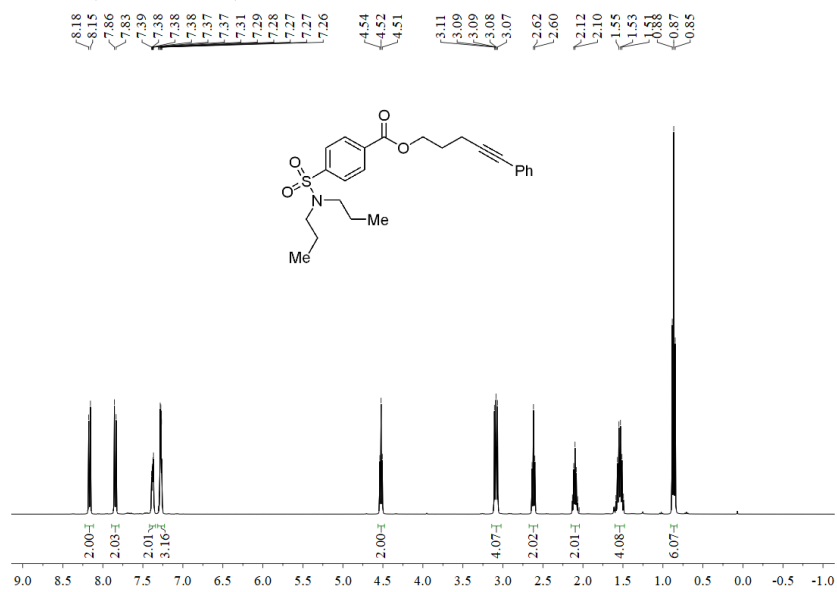

**<sup>13</sup>C NMR (101 MHz, CDCl<sub>3</sub>)**

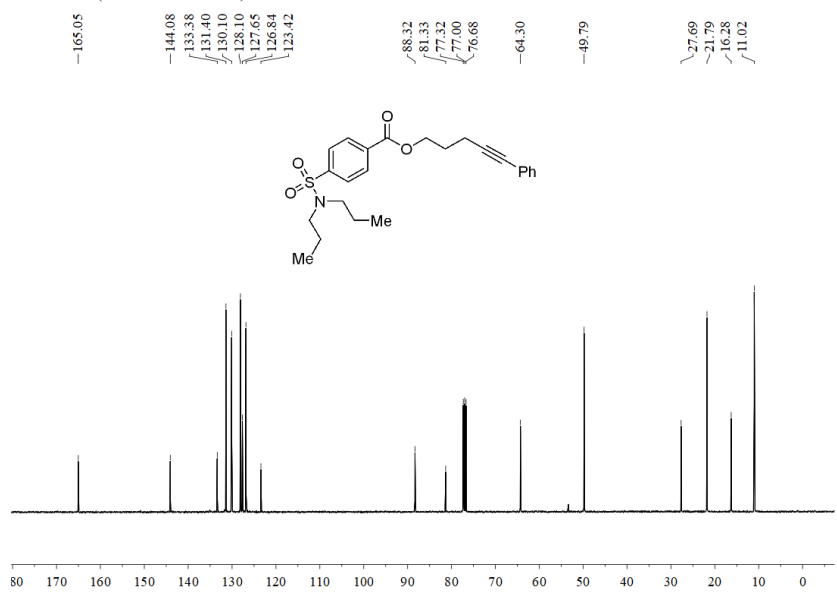

**<sup>1</sup>H NMR (400 MHz, CDCl<sub>3</sub>)**

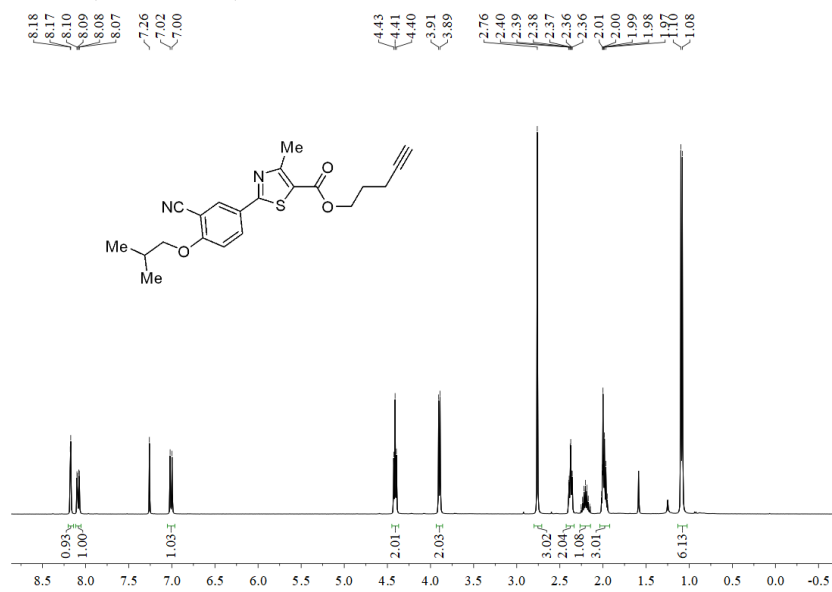

**<sup>13</sup>C NMR (101 MHz, CDCl<sub>3</sub>)**

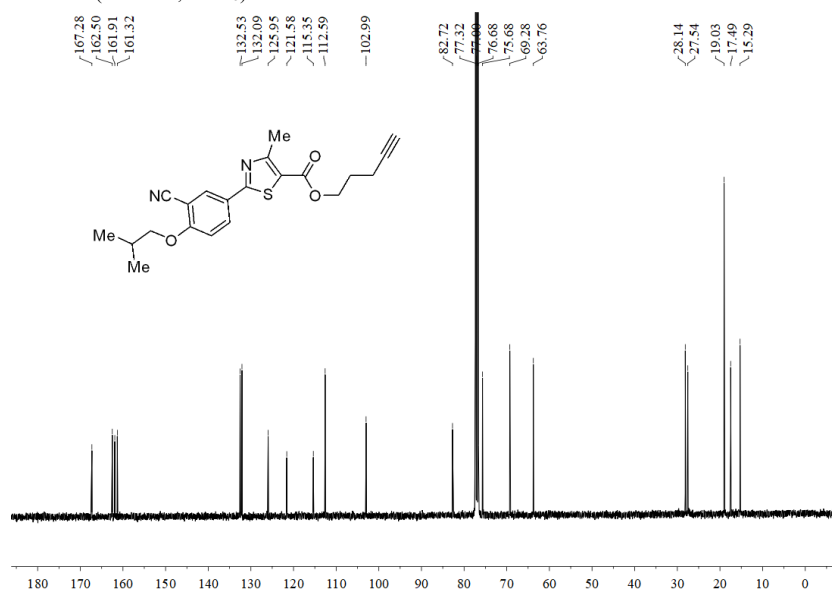



**<sup>1</sup>H NMR (400 MHz, CDCl<sub>3</sub>)**

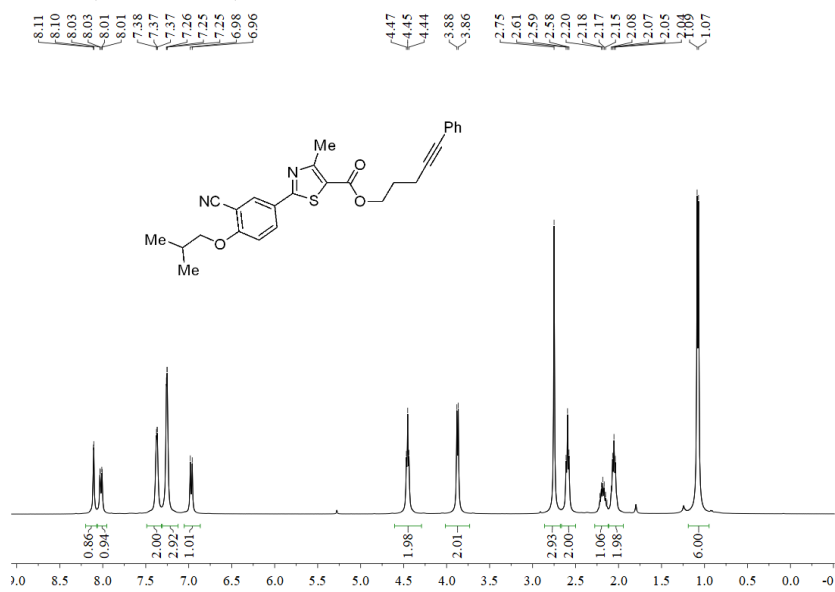

**<sup>13</sup>C NMR (101 MHz, CDCl<sub>3</sub>)**

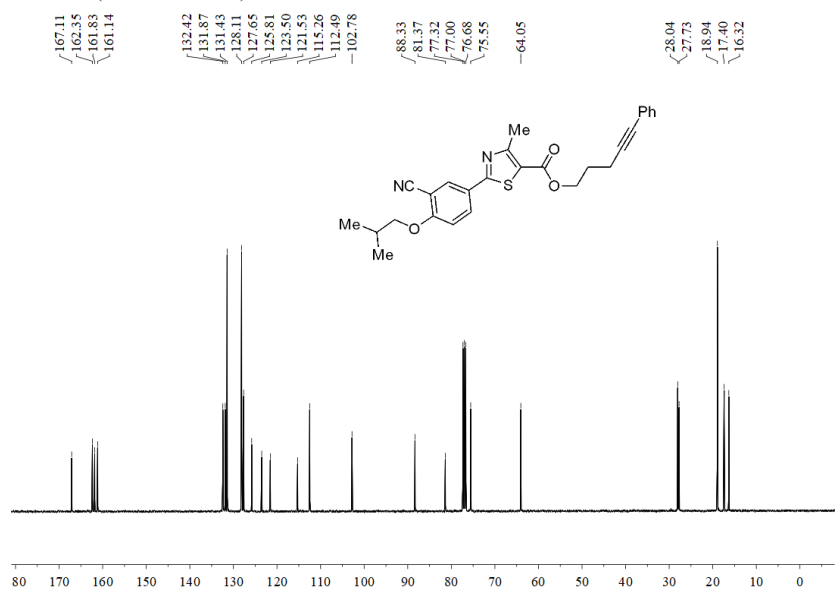

**<sup>1</sup>H NMR (400 MHz, CDCl<sub>3</sub>)**

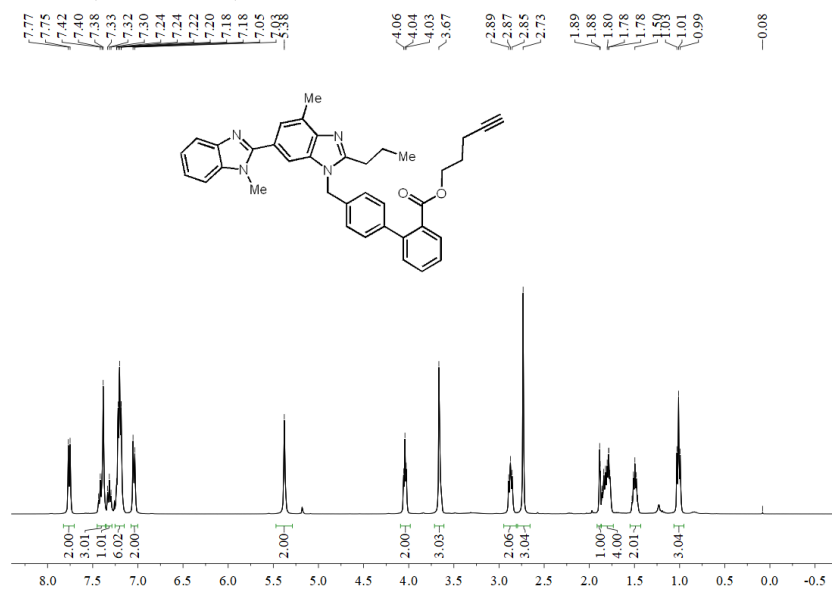

**<sup>13</sup>C NMR (101 MHz, CDCl<sub>3</sub>)**

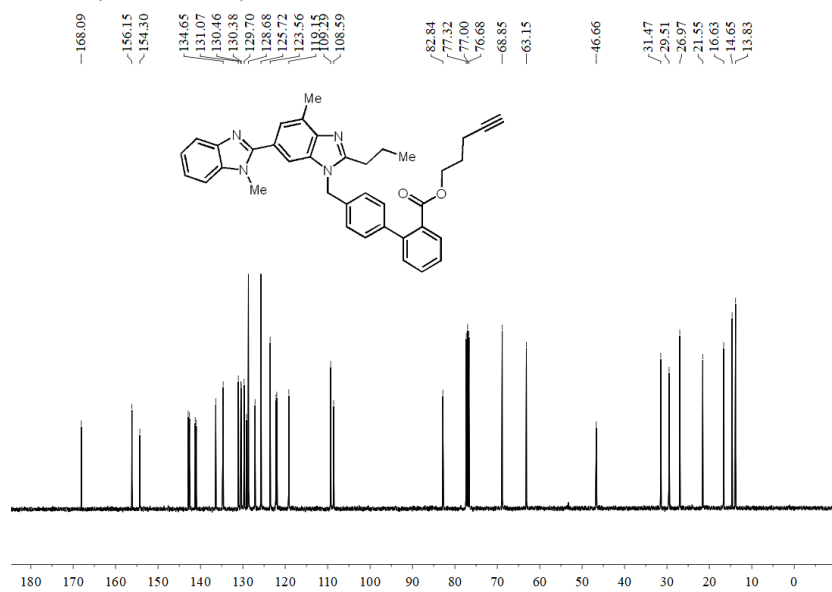

**<sup>1</sup>H NMR (500 MHz, CDCl<sub>3</sub>)**

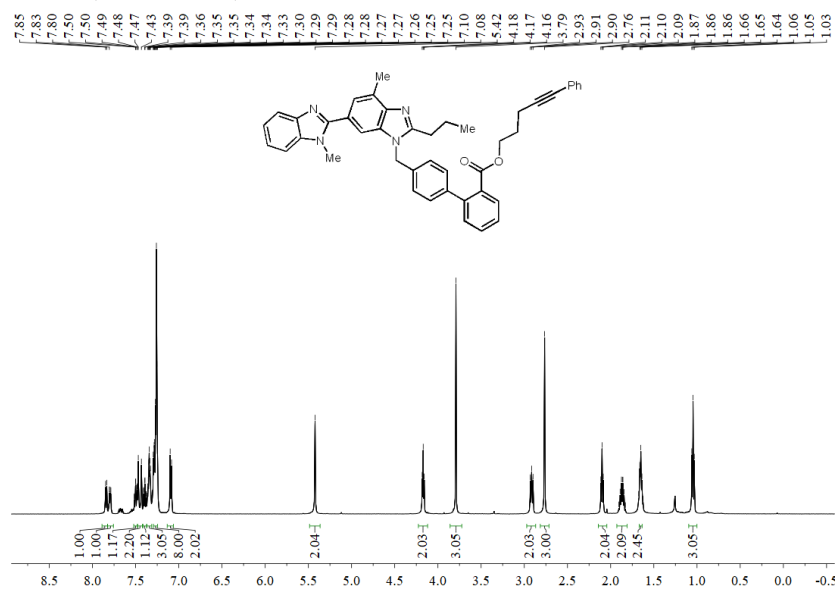

**<sup>13</sup>C NMR (126 MHz, CDCl<sub>3</sub>)**

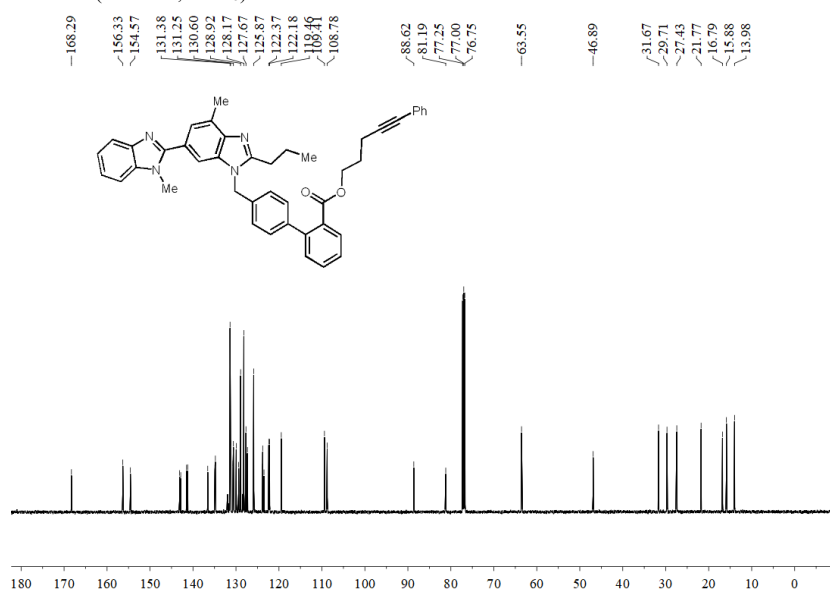

**<sup>1</sup>H NMR (500 MHz, CDCl<sub>3</sub>) (1)**

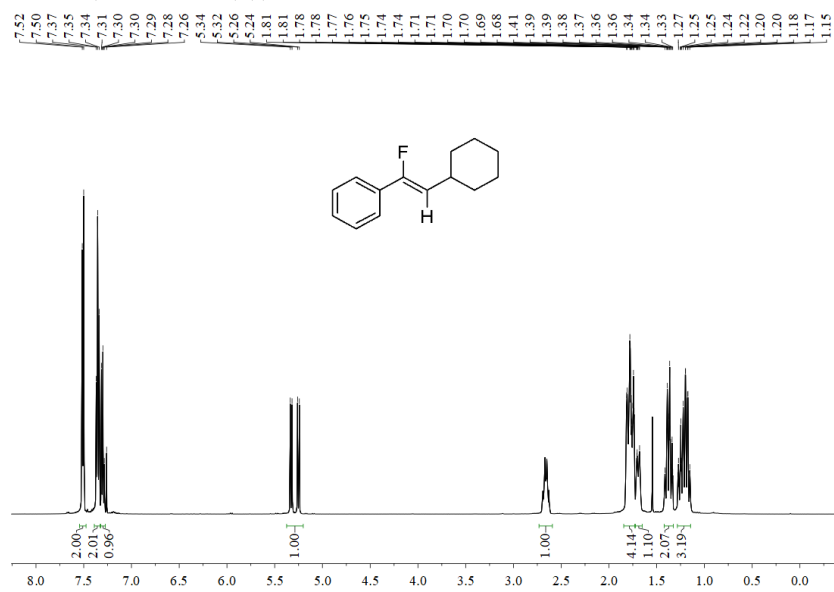

**<sup>13</sup>C NMR (126 MHz, CDCl<sub>3</sub>) (1)**

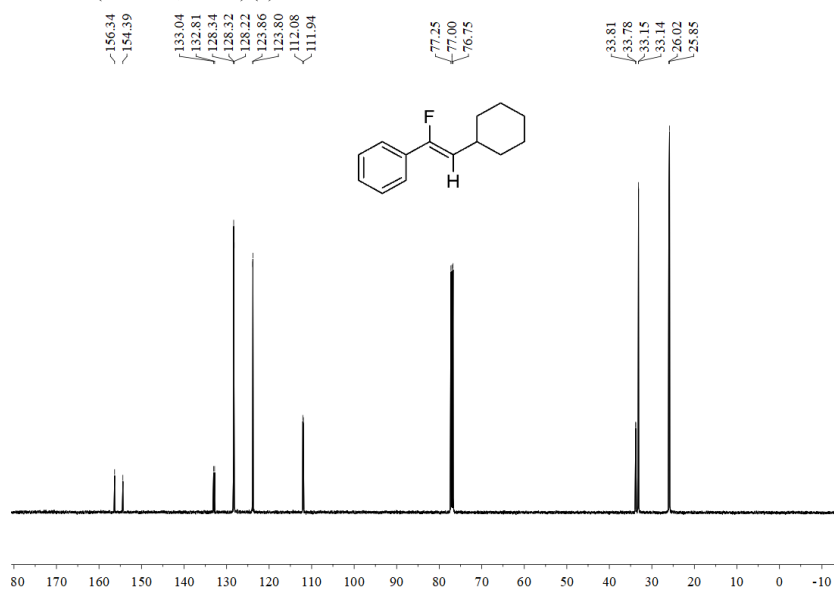

$^{19}\text{F}$  NMR (471 MHz,  $\text{CDCl}_3$ ) (1)

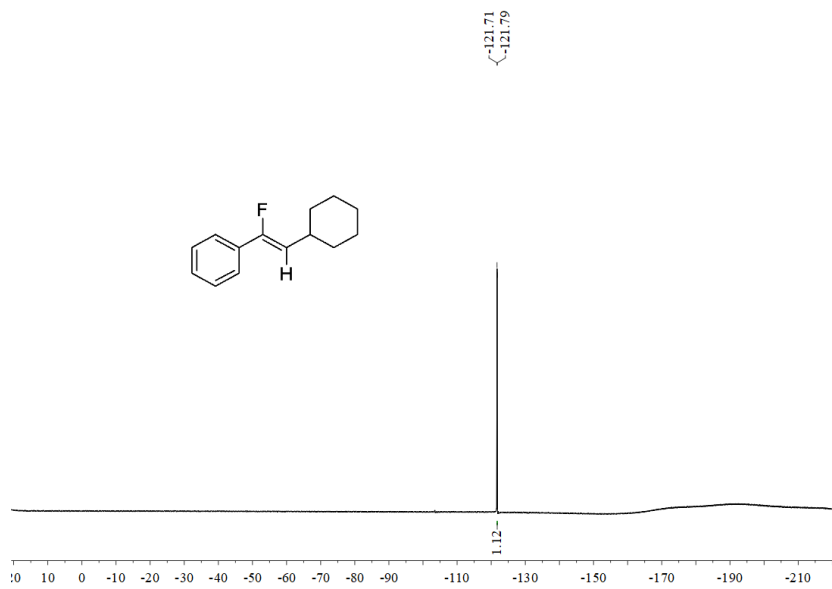

$^1\text{H}$  NMR (500 MHz,  $\text{CDCl}_3$ ) (2)

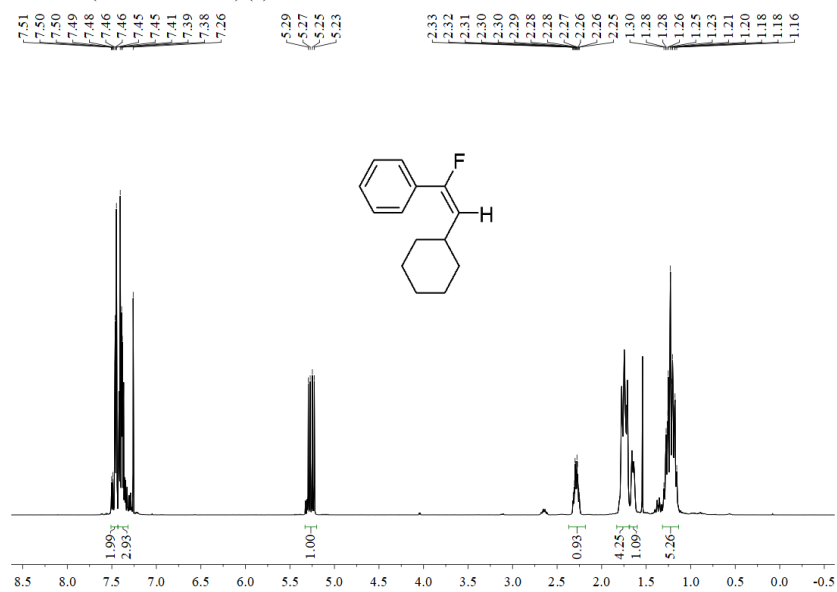

<sup>13</sup>C NMR (126 MHz, CDCl<sub>3</sub>) (2)

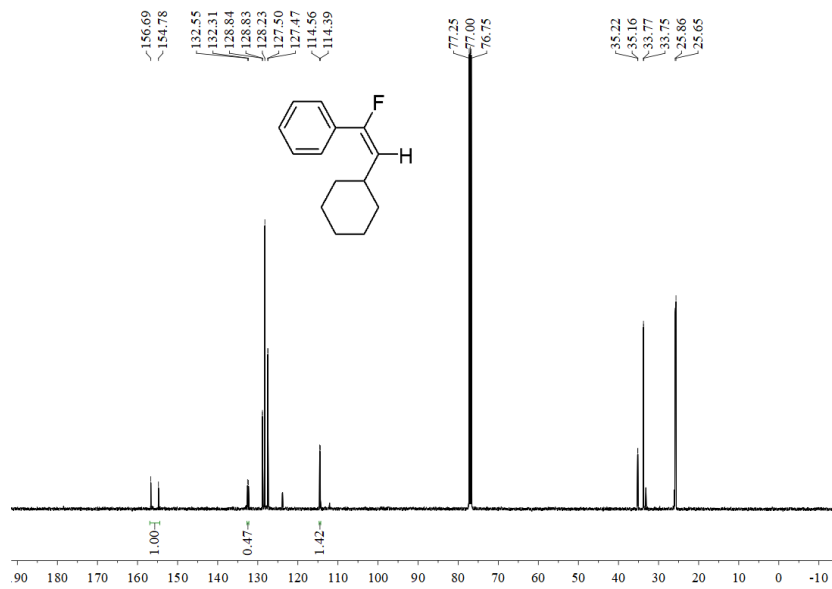

<sup>19</sup>F NMR (471 MHz, CDCl<sub>3</sub>) (2)

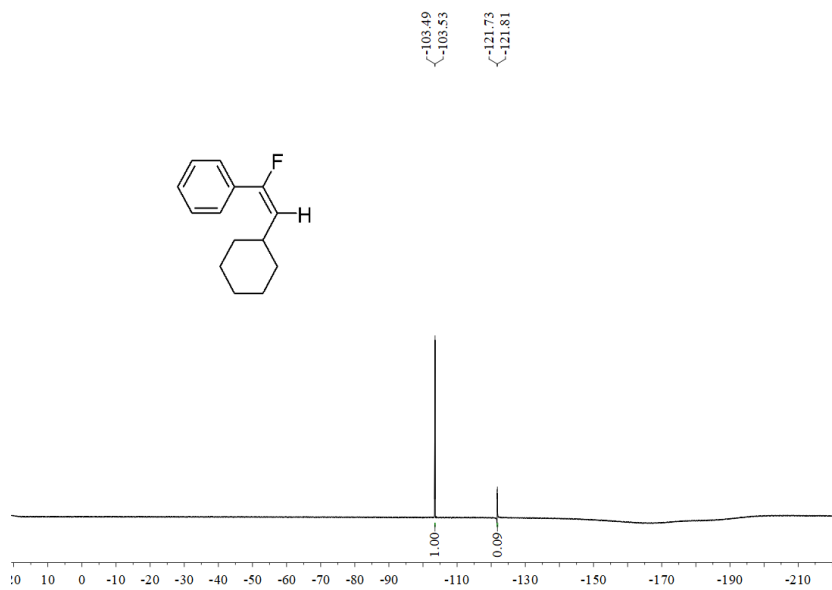

<sup>1</sup>H NMR (500 MHz, CDCl<sub>3</sub>) (3)

7.47  
7.47  
7.46  
7.46  
7.46  
7.45  
7.45  
7.26  
7.26  
7.05  
7.03  
7.01  
5.24  
5.22  
5.16  
5.14  
2.63  
2.61  
1.79  
1.78  
1.76  
1.73  
1.73  
1.72  
1.70  
1.69  
1.69  
1.69  
1.69  
1.67  
1.67  
1.66  
1.66  
1.38  
1.37  
1.36  
1.35  
1.35  
1.34  
1.34  
1.25  
1.25  
1.24  
1.23  
1.22  
1.20  
1.20  
1.18  
1.17  
1.15  
1.13

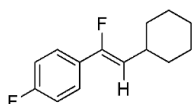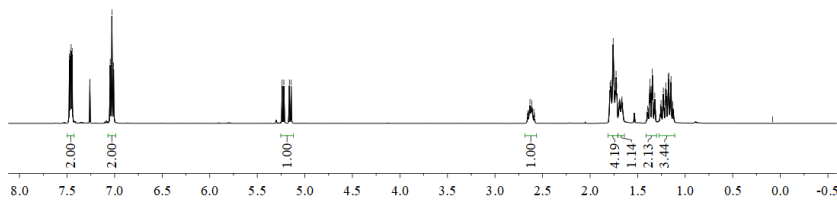

<sup>13</sup>C NMR (126 MHz, CDCl<sub>3</sub>) (3)

163.69  
161.72  
155.64  
153.69  
129.31  
129.28  
129.04  
125.81  
125.75  
125.75  
115.92  
115.41  
115.25  
115.24  
111.85  
111.83  
111.71  
111.70  
77.25  
77.00  
76.75  
33.81  
33.78  
33.15  
33.14  
26.00  
25.83

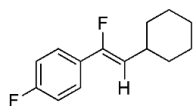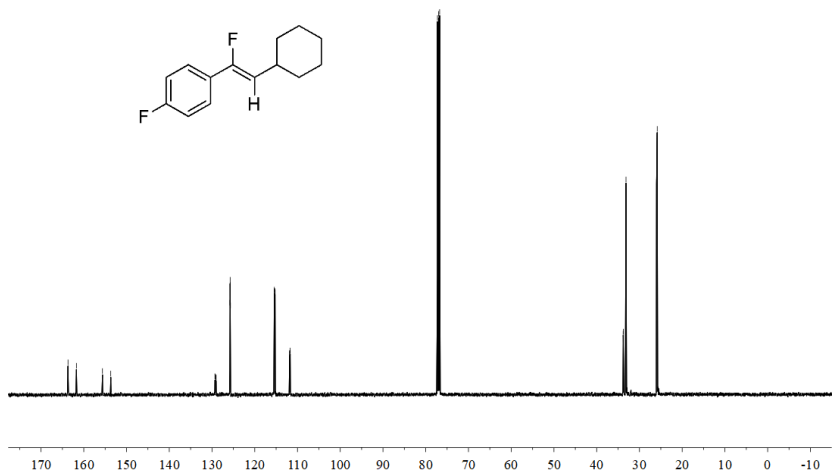

<sup>19</sup>F NMR (471 MHz, CDCl<sub>3</sub>) (3)

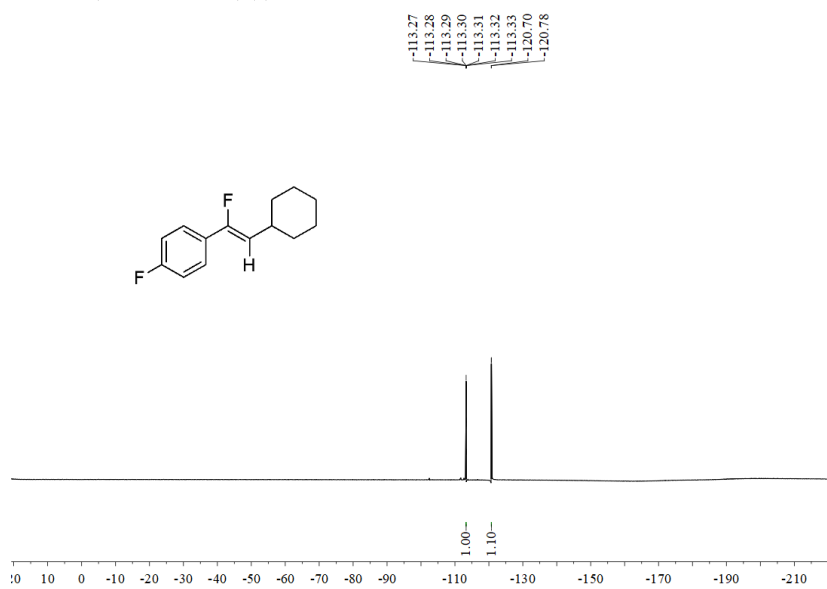

<sup>1</sup>H NMR (500 MHz, CDCl<sub>3</sub>) (4)

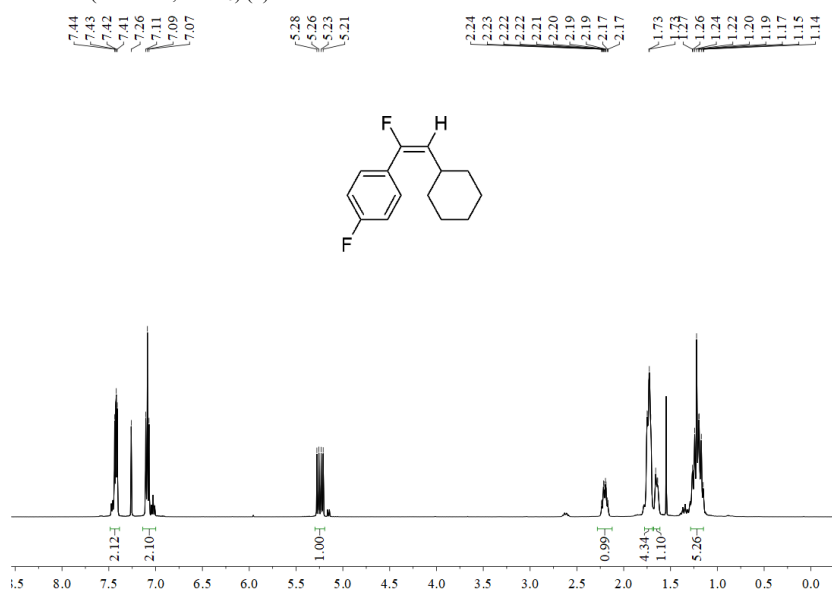



<sup>13</sup>C NMR (126 MHz, CDCl<sub>3</sub>) (4)

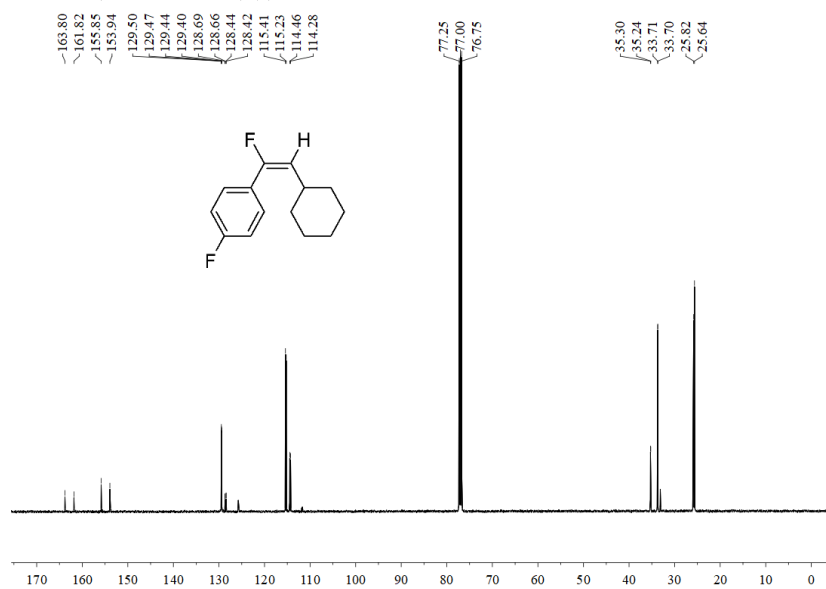

<sup>19</sup>F NMR (471 MHz, CDCl<sub>3</sub>) (4)

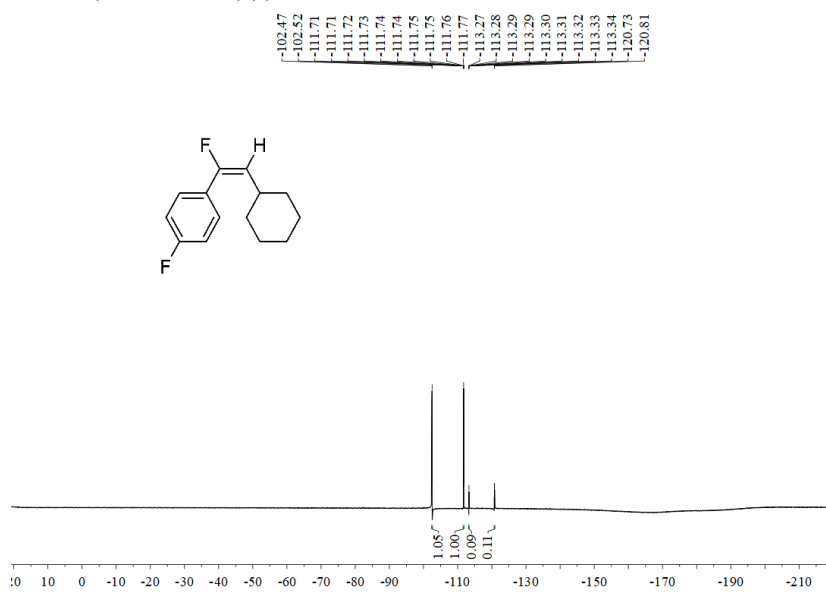

**<sup>1</sup>H NMR (500 MHz, CDCl<sub>3</sub>) (5)**

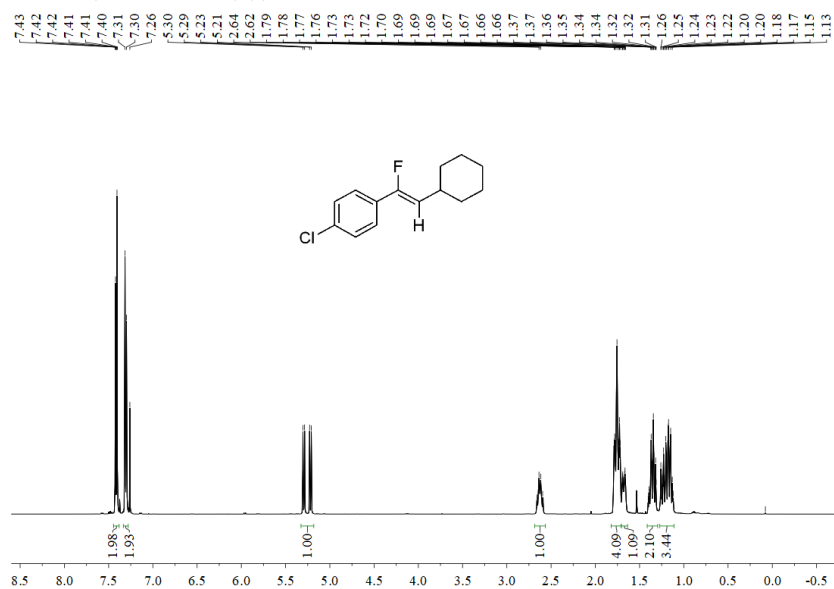

**<sup>13</sup>C NMR (126 MHz, CDCl<sub>3</sub>) (5)**

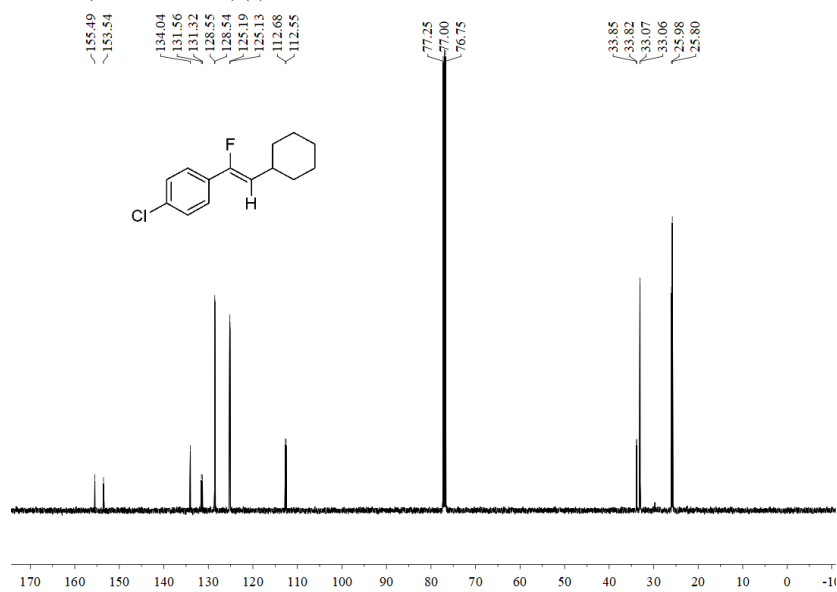

<sup>19</sup>F NMR (471 MHz, CDCl<sub>3</sub>) (5)

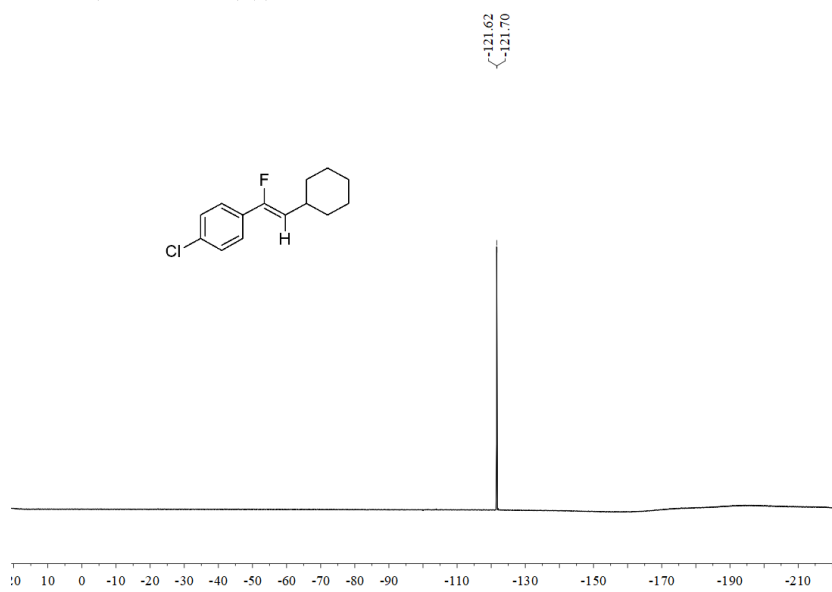

<sup>1</sup>H NMR (500 MHz, CDCl<sub>3</sub>) (6)

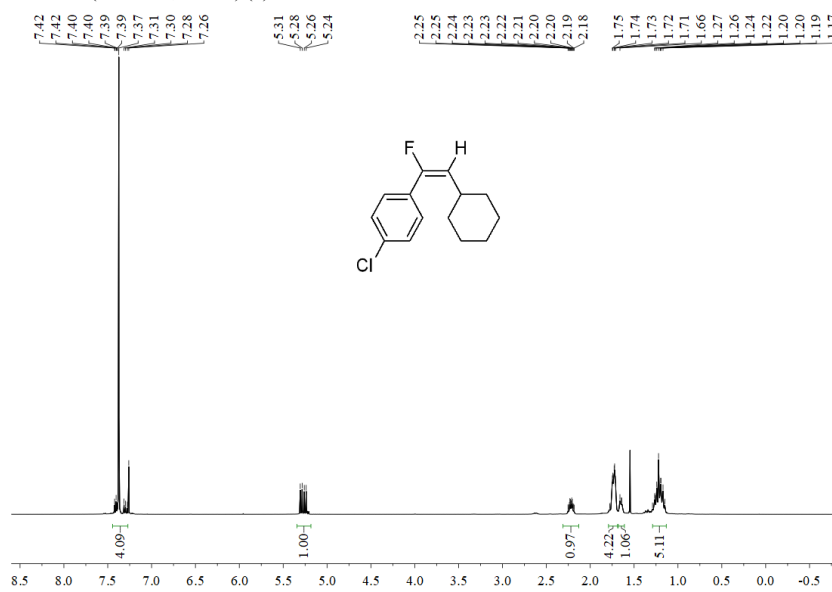

<sup>13</sup>C NMR (126 MHz, CDCl<sub>3</sub>) (6)

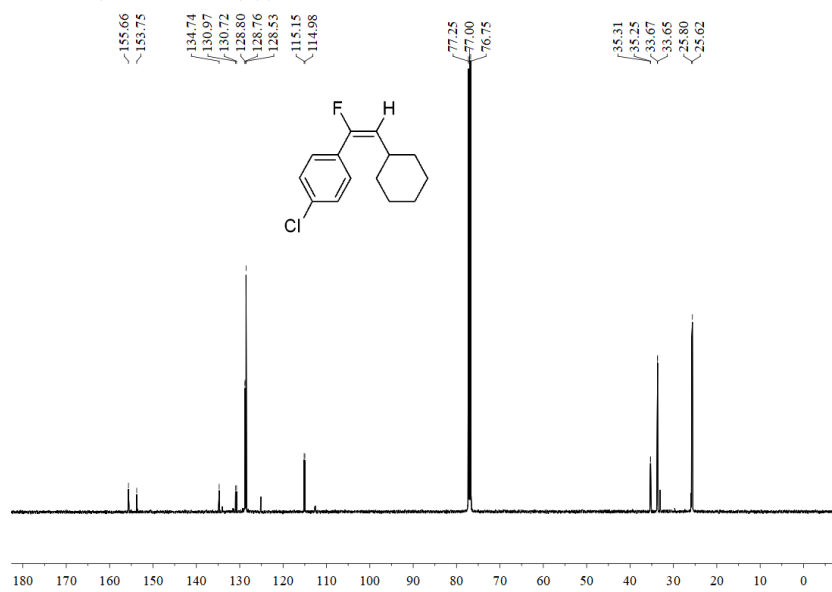

<sup>19</sup>F NMR (471 MHz, CDCl<sub>3</sub>) (6)

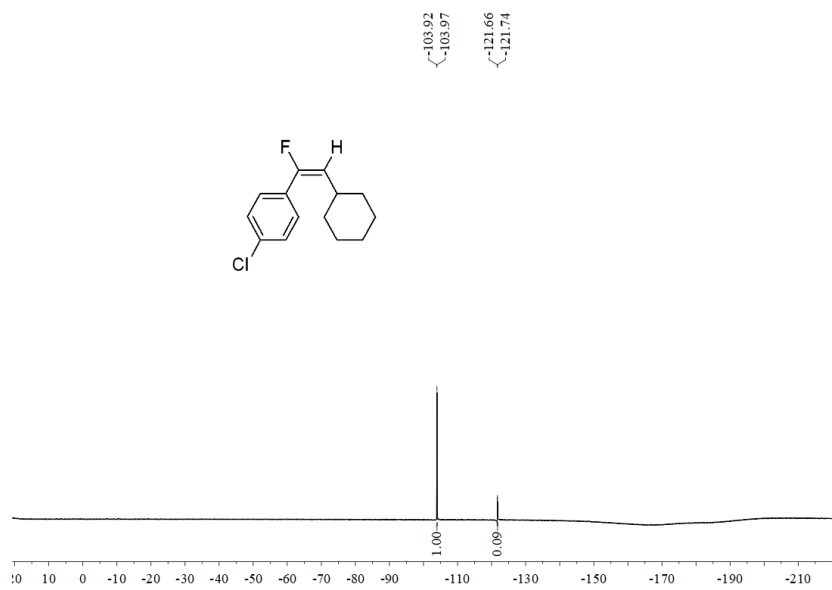

**<sup>1</sup>H NMR (500 MHz, CDCl<sub>3</sub>) (7)**

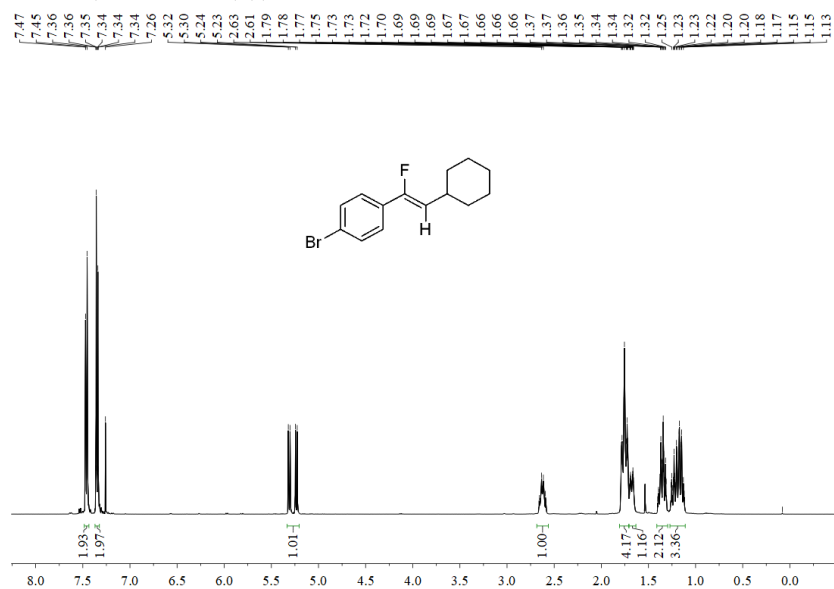

**<sup>13</sup>C NMR (126 MHz, CDCl<sub>3</sub>) (7)**

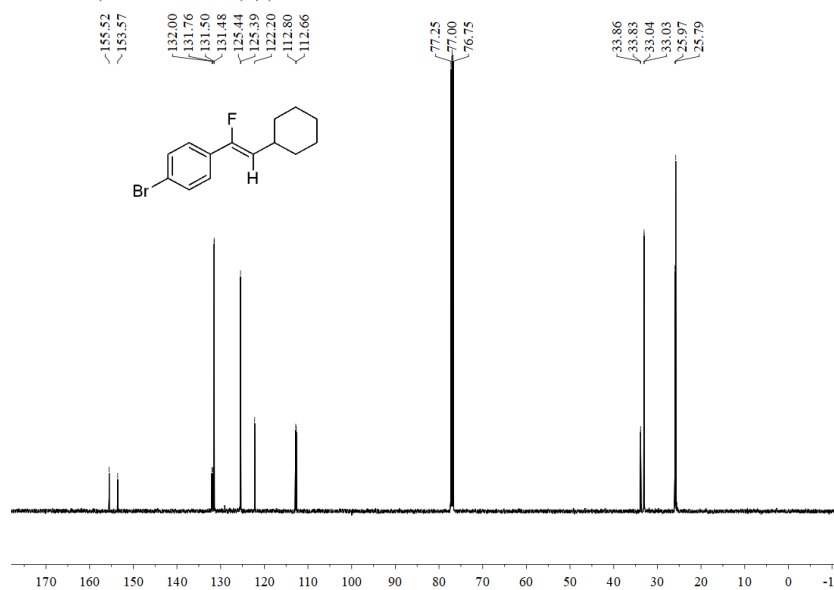

$^{19}\text{F}$  NMR (471 MHz,  $\text{CDCl}_3$ ) (7)

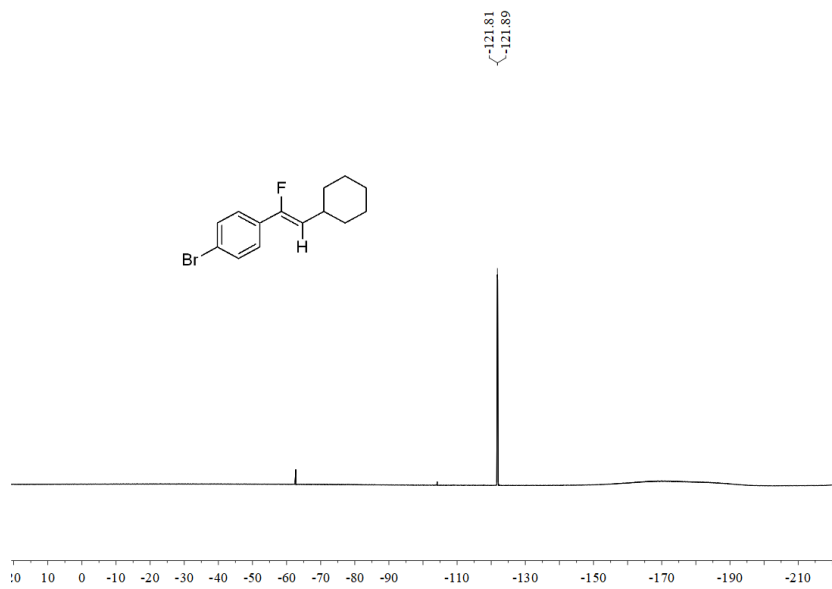

$^1\text{H}$  NMR (500 MHz,  $\text{CDCl}_3$ ) (8)

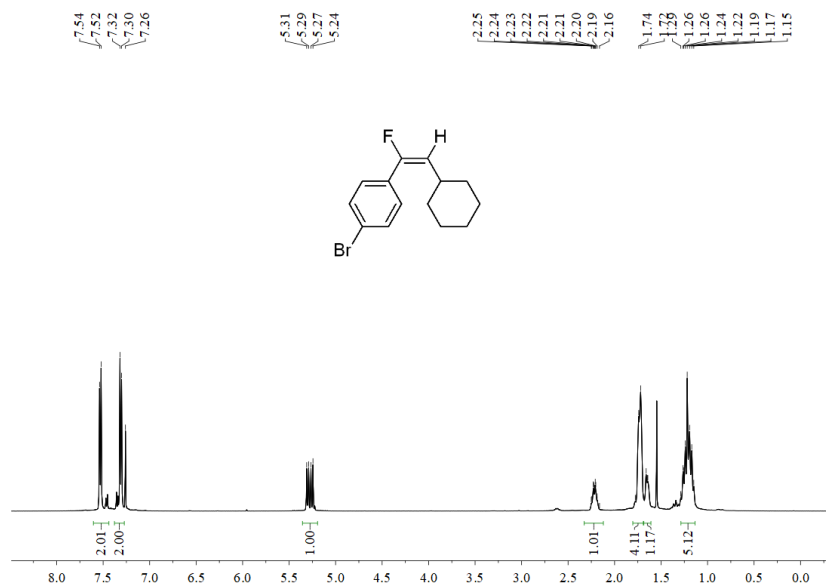

**<sup>13</sup>C NMR (126 MHz, CDCl<sub>3</sub>) (8)**

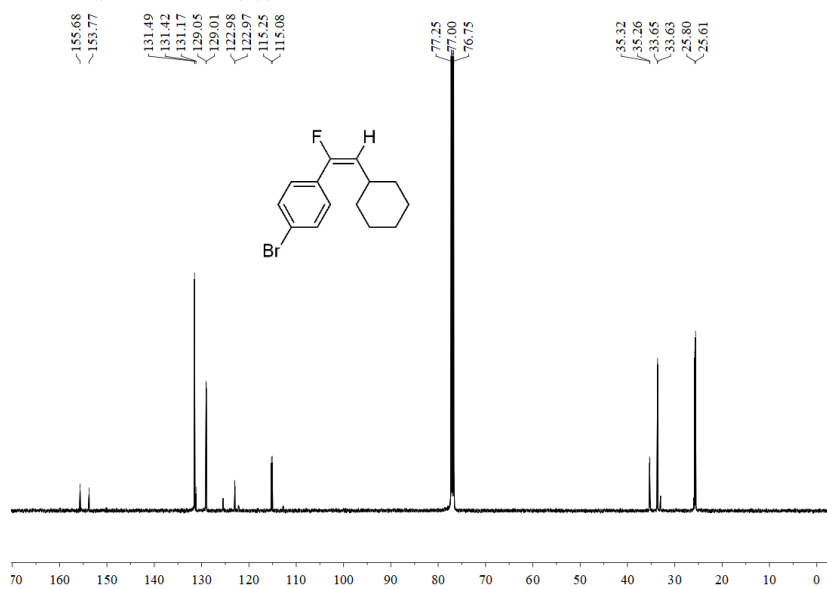

**<sup>19</sup>F NMR (471 MHz, CDCl<sub>3</sub>) (8)**

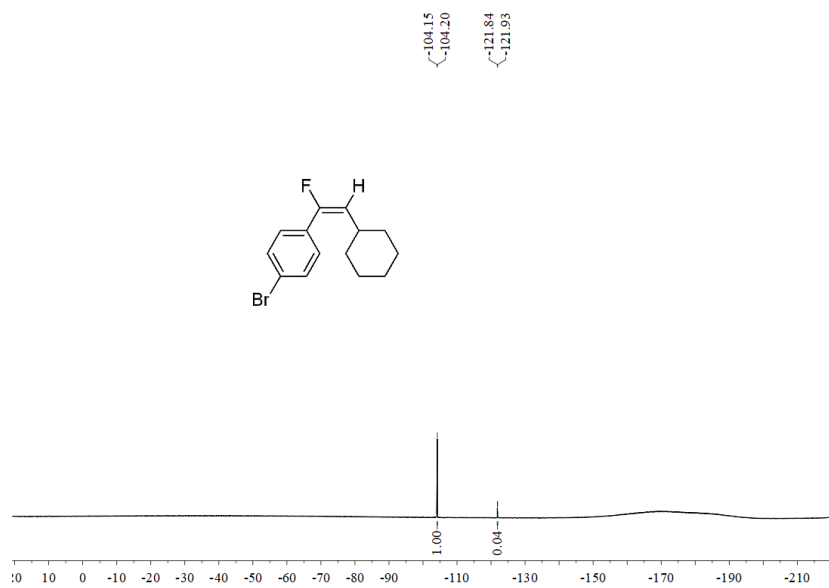

**<sup>1</sup>H NMR (500 MHz, CDCl<sub>3</sub>) (9)**

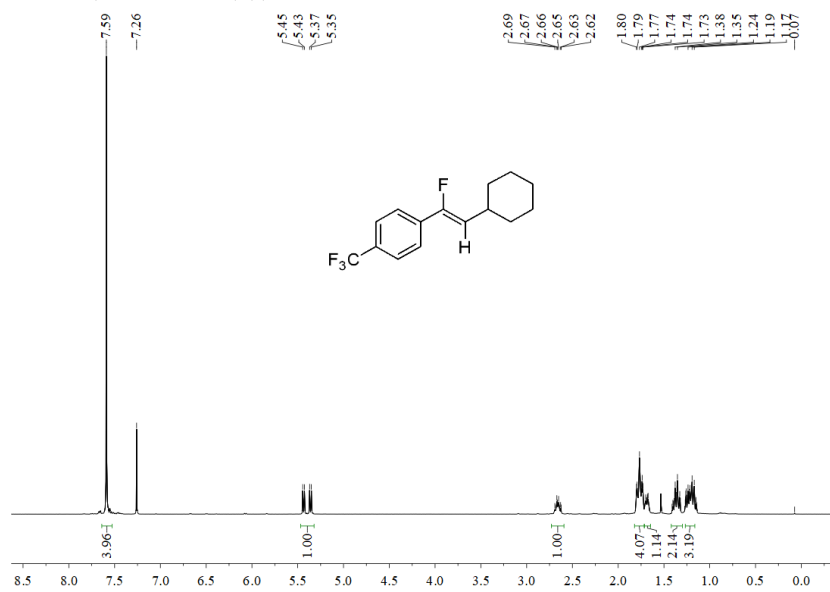

**<sup>13</sup>C NMR (126 MHz, CDCl<sub>3</sub>) (9)**

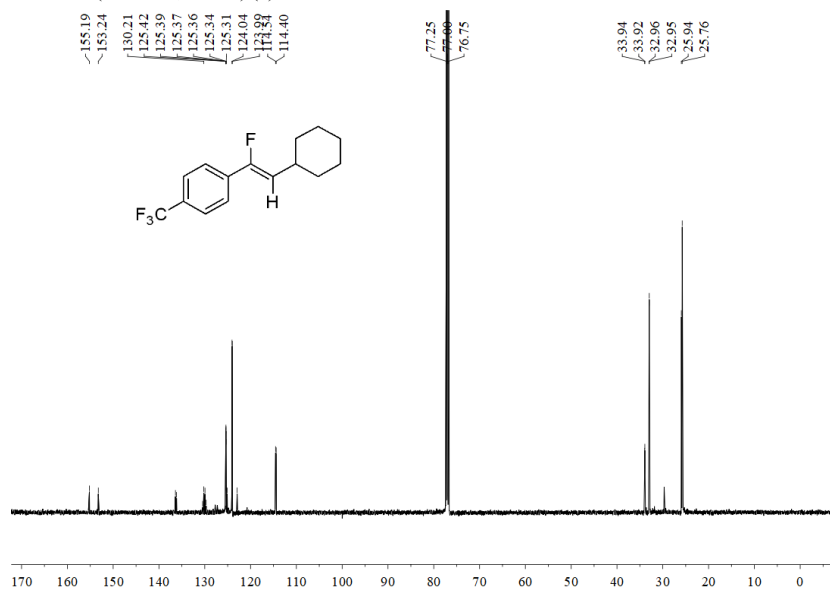



<sup>19</sup>F NMR (471 MHz, CDCl<sub>3</sub>) (9)

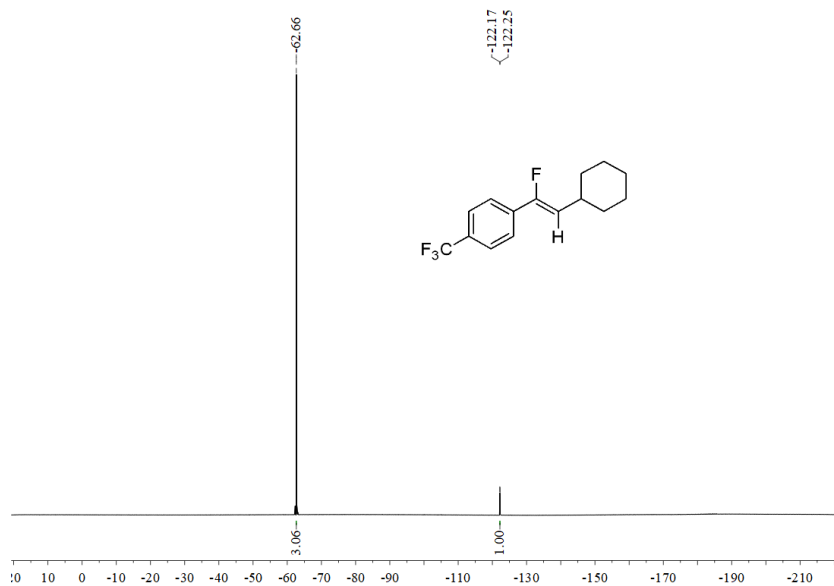

<sup>1</sup>H NMR (500 MHz, CDCl<sub>3</sub>) (10)

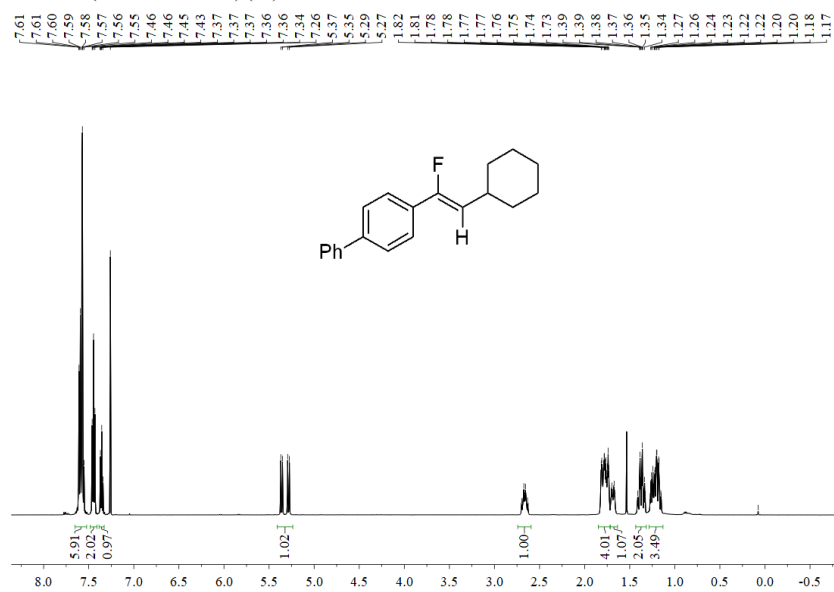

**<sup>13</sup>C NMR (126 MHz, CDCl<sub>3</sub>) (10)**

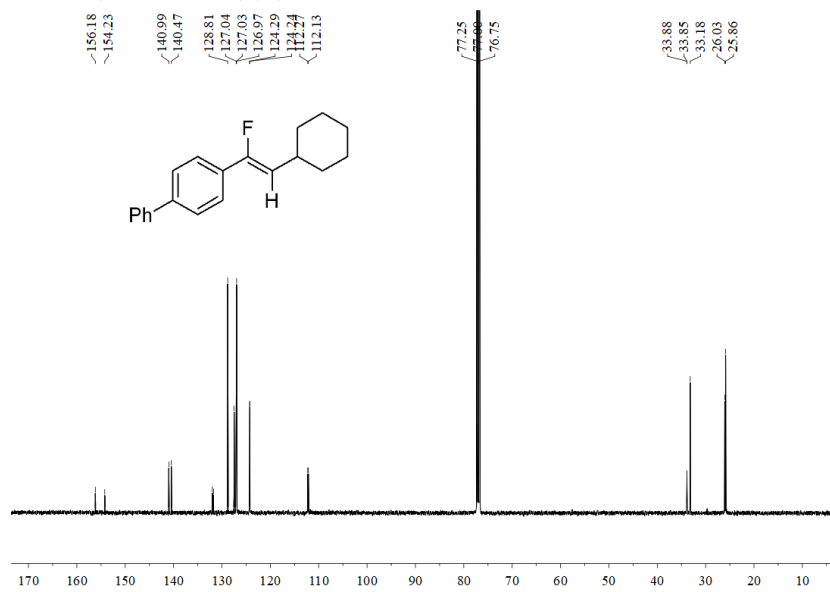

**<sup>19</sup>F NMR (471 MHz, CDCl<sub>3</sub>) (10)**

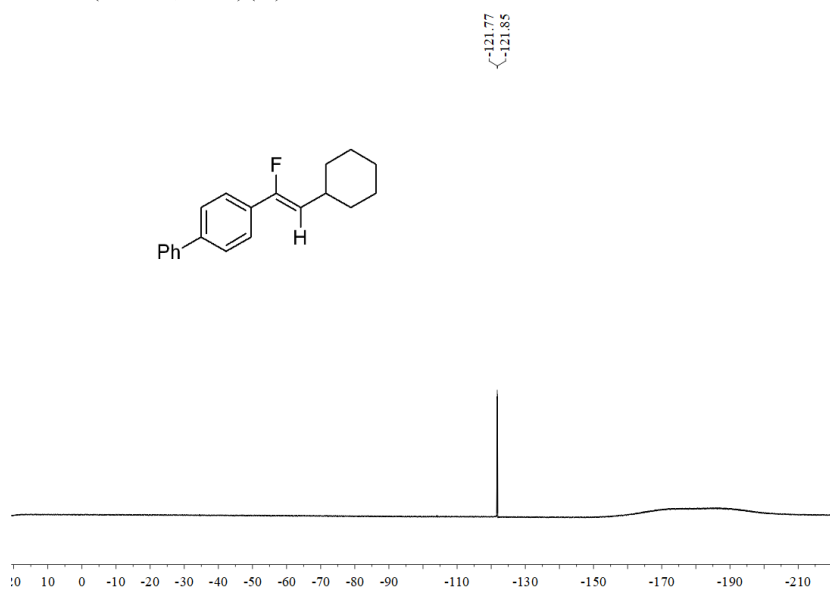

**<sup>1</sup>H NMR (500 MHz, CDCl<sub>3</sub>) (11)**

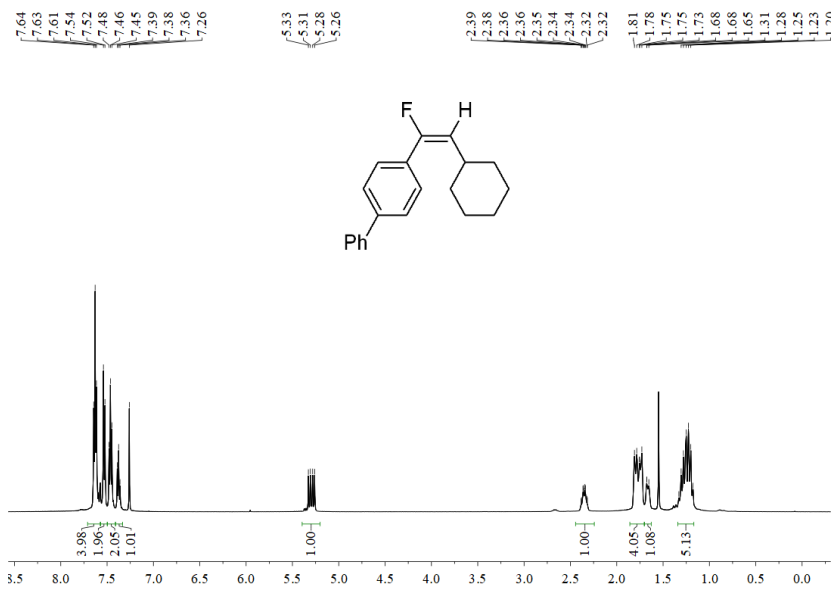

<sup>13</sup>C NMR (126 MHz, CDCl<sub>3</sub>) (11)

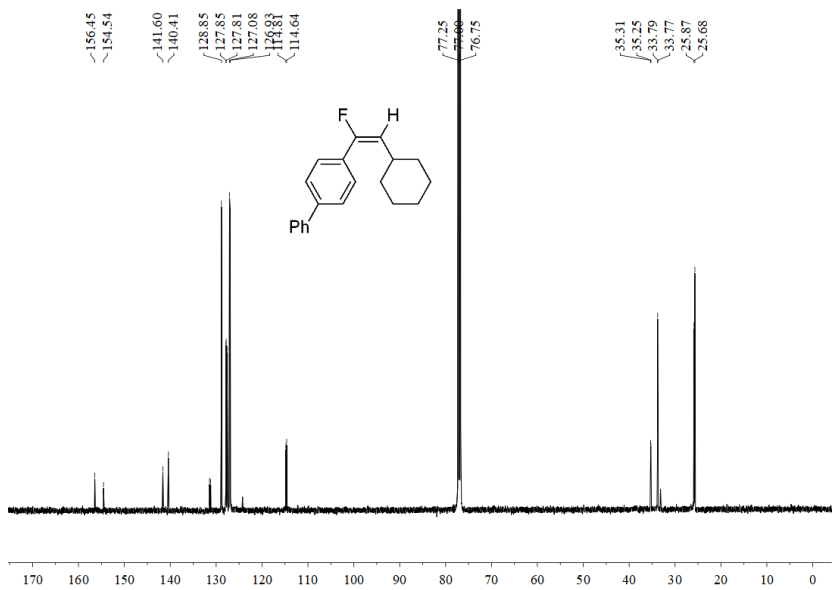

<sup>19</sup>F NMR (471 MHz, CDCl<sub>3</sub>) (11)

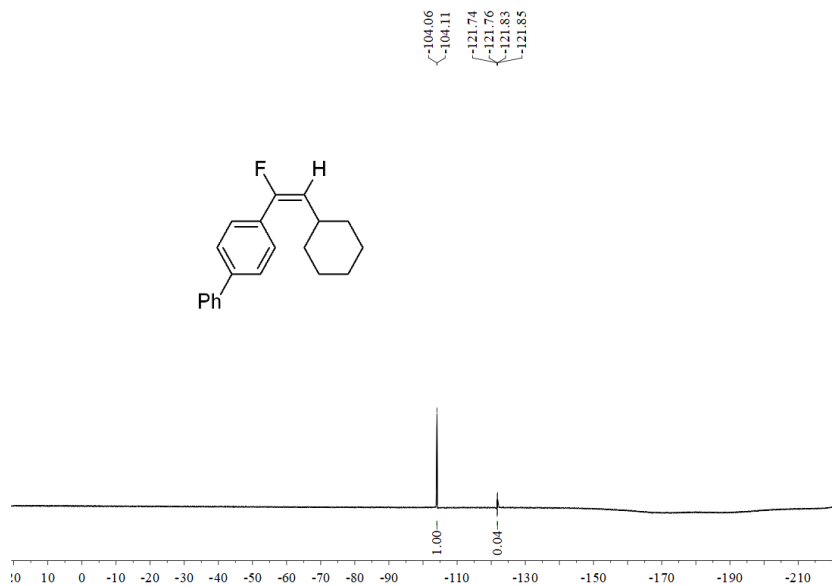

<sup>1</sup>H NMR (500 MHz, CDCl<sub>3</sub>) (12)

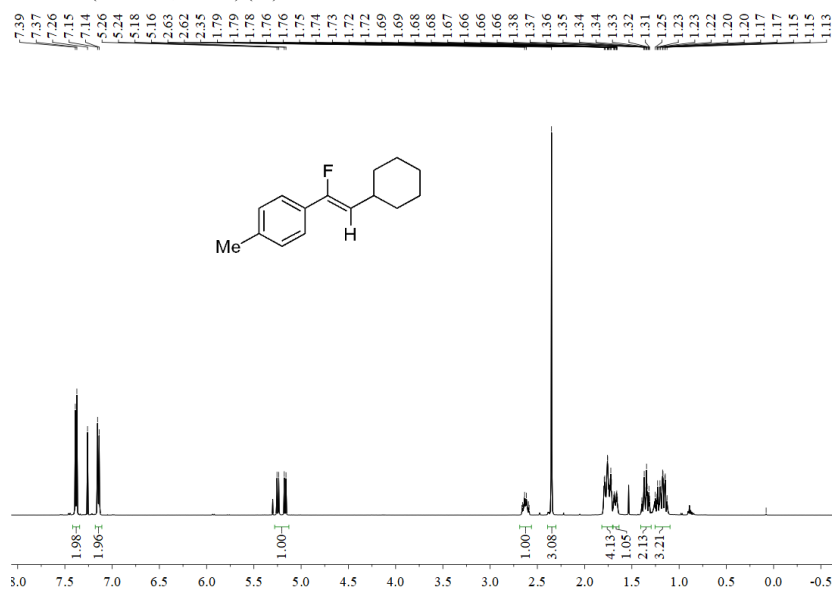

<sup>13</sup>C NMR (126 MHz, CDCl<sub>3</sub>) (12)

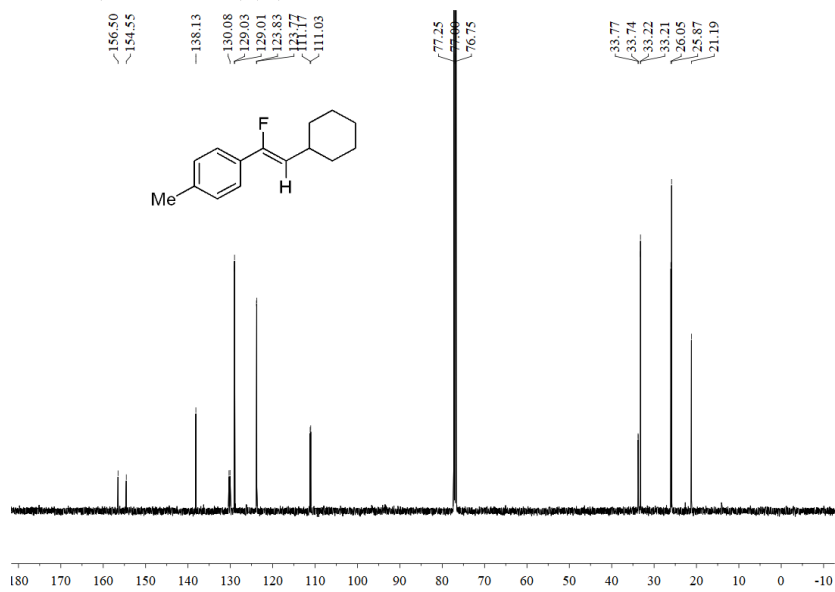

<sup>19</sup>F NMR (471 MHz, CDCl<sub>3</sub>) (12)

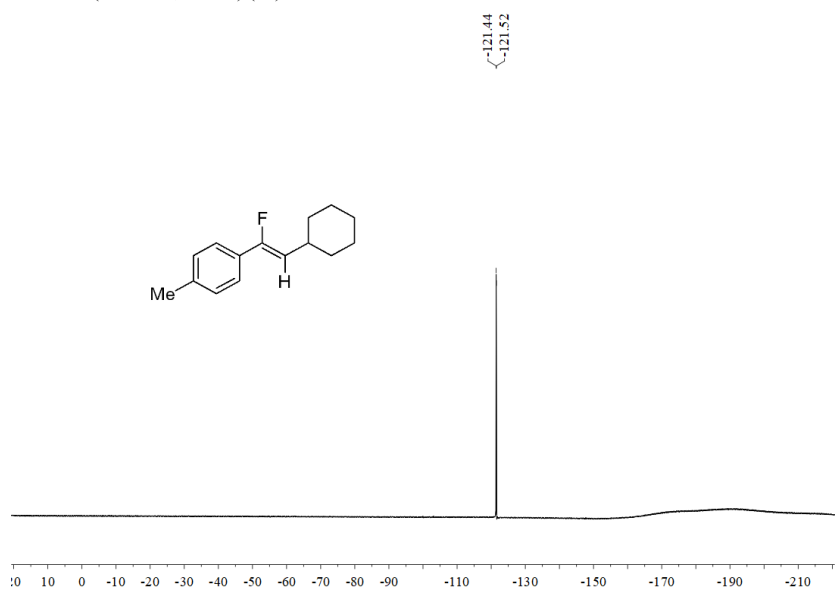

**<sup>1</sup>H NMR (500 MHz, CDCl<sub>3</sub>) (13)**

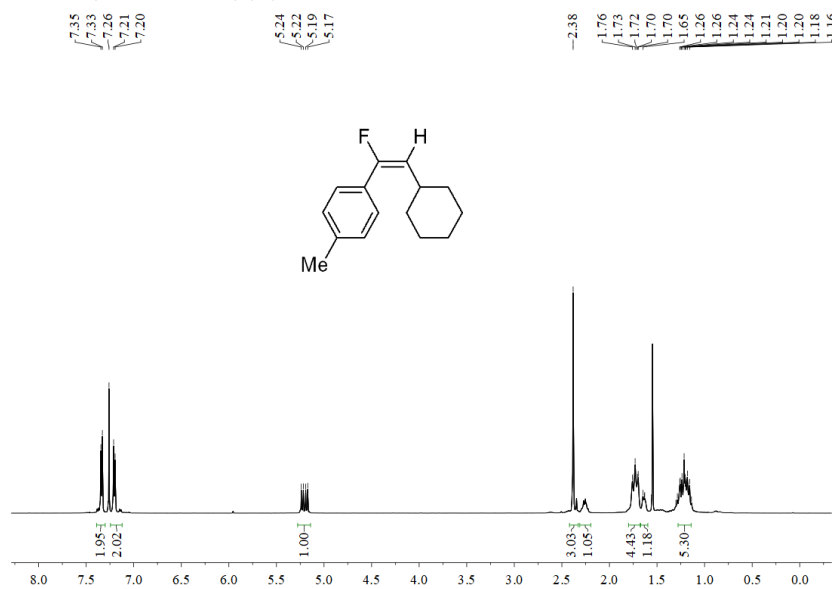

**<sup>13</sup>C NMR (126 MHz, CDCl<sub>3</sub>) (13)**

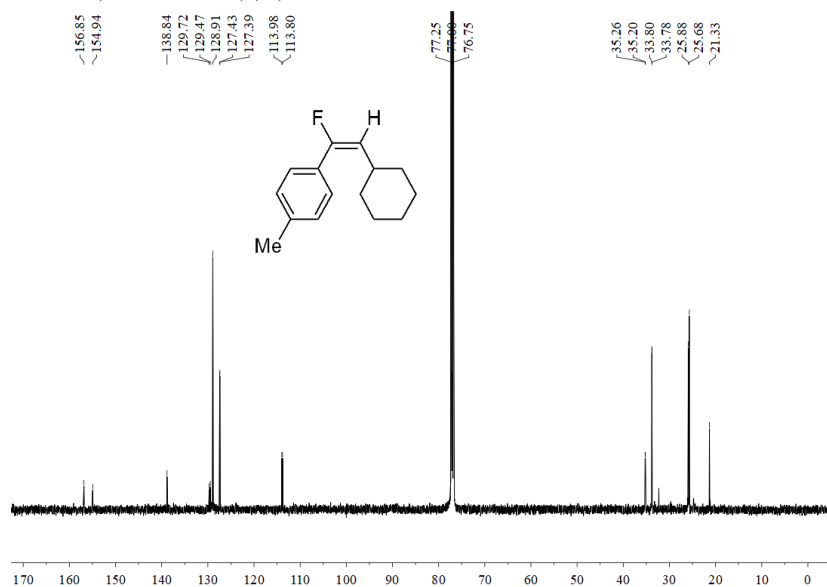

<sup>19</sup>F NMR (471 MHz, CDCl<sub>3</sub>) (13)

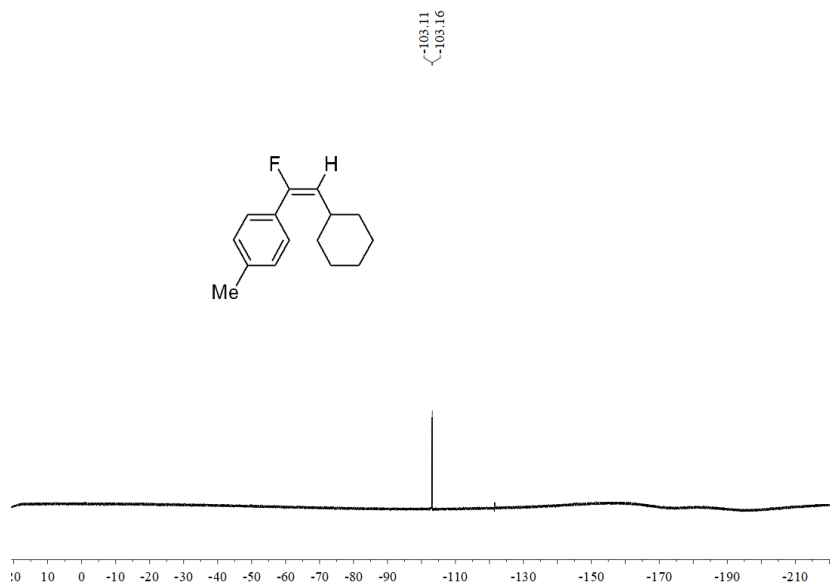

<sup>1</sup>H NMR (500 MHz, CDCl<sub>3</sub>) (14)

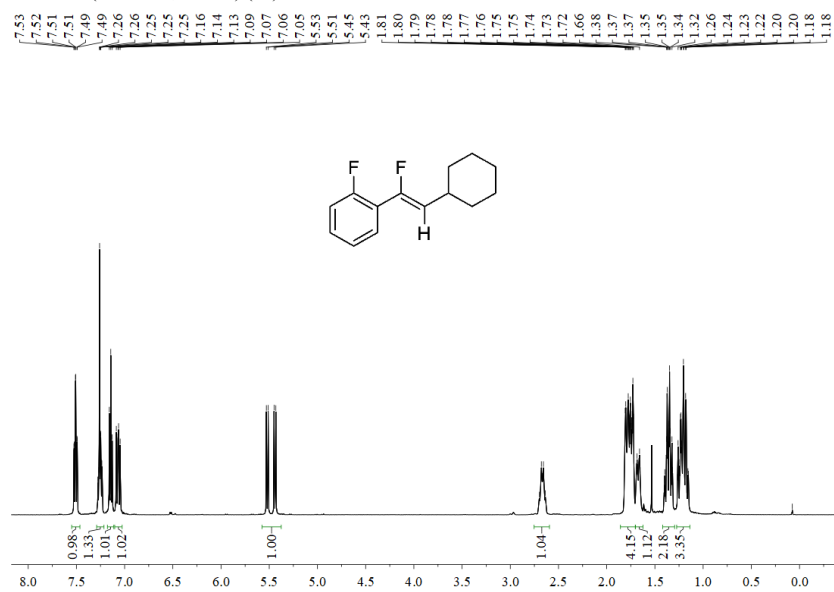

<sup>13</sup>C NMR (126 MHz, CDCl<sub>3</sub>) (14)

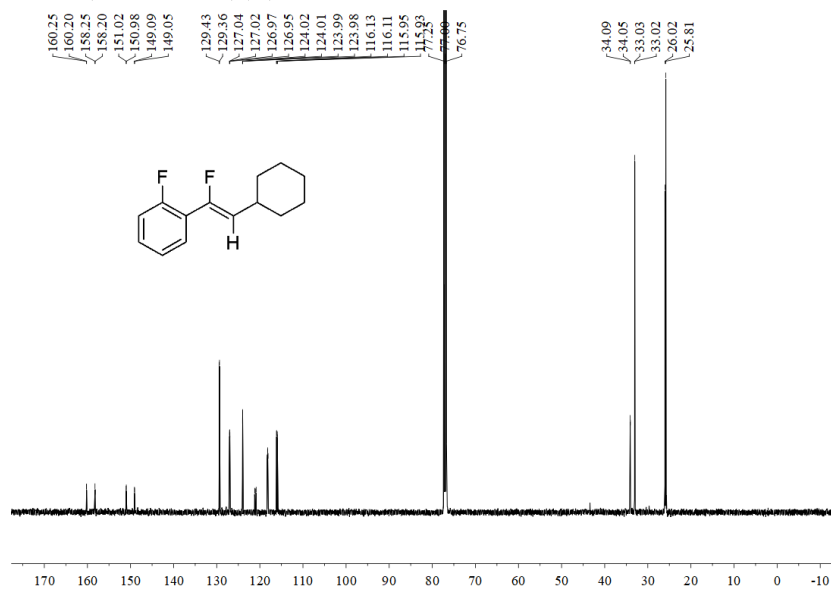

<sup>19</sup>F NMR (471 MHz, CDCl<sub>3</sub>) (14)

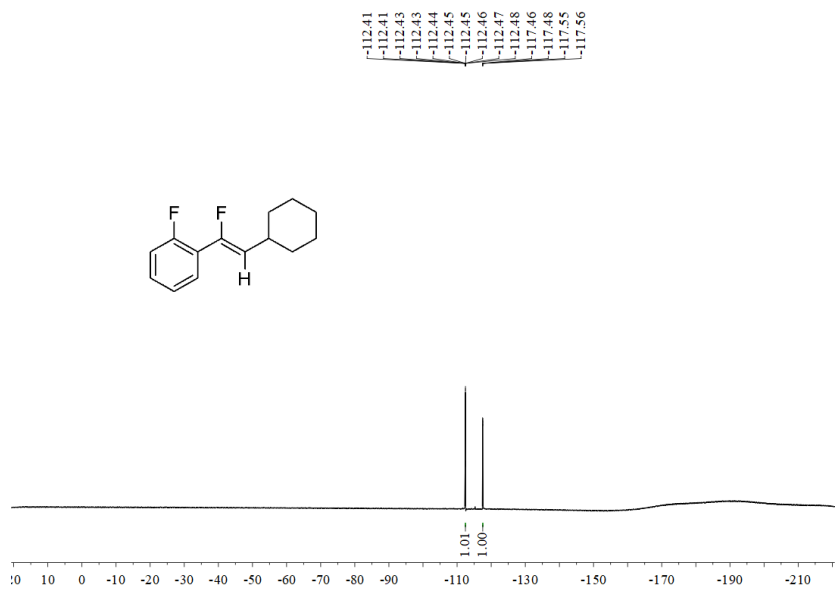



**<sup>1</sup>H NMR (500 MHz, CDCl<sub>3</sub>) (15)**

7.41, 7.41, 7.39, 7.39, 7.38, 7.38, 7.36, 7.35, 7.19, 7.17, 7.16, 7.14, 7.12, 7.10, 5.41, 5.39, 5.37, 5.35, 1.91, 1.89, 1.87, 1.73, 1.69, 1.67, 1.65, 1.61, 1.60, 1.60, 1.22, 1.22, 1.18, 1.16, 1.15, 1.12, 1.10, 1.09

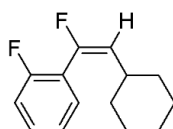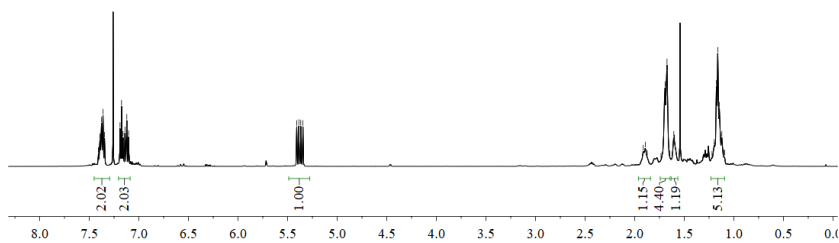

**<sup>13</sup>C NMR (126 MHz, CDCl<sub>3</sub>) (15)**

160.98, 159.00, 151.82, 149.89, 131.15, 131.13, 131.08, 131.07, 130.96, 130.94, 130.92, 123.90, 123.87, 120.51, 120.39, 120.27, 120.15, 116.97, 116.81, 116.09, 115.92, 77.25, 76.75, 35.55, 35.50, 33.41, 33.39, 25.83, 25.62

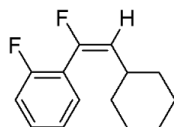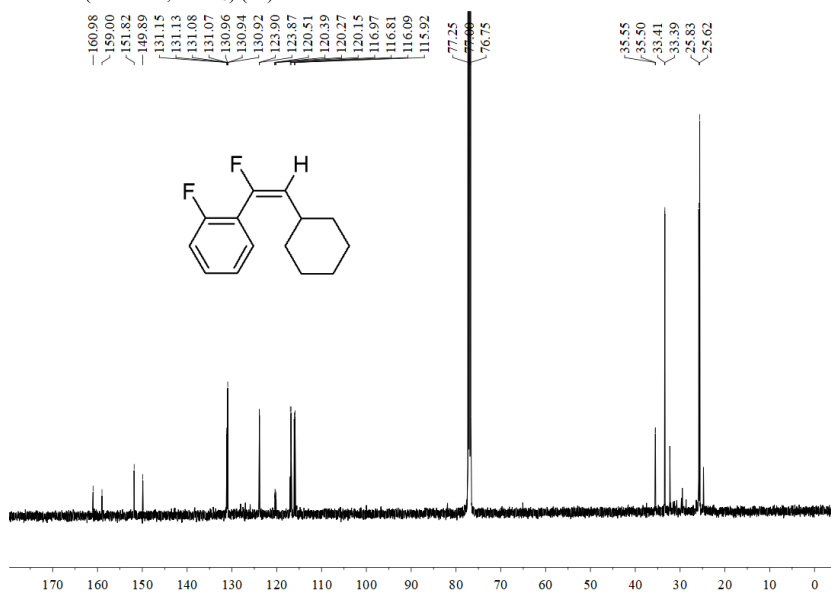

<sup>19</sup>F NMR (471 MHz, CDCl<sub>3</sub>) (15)

-99.94  
-99.95  
-99.98  
-100.00  
-112.19  
-112.21  
-112.22  
-112.24  
-112.25

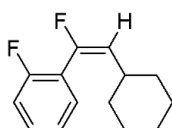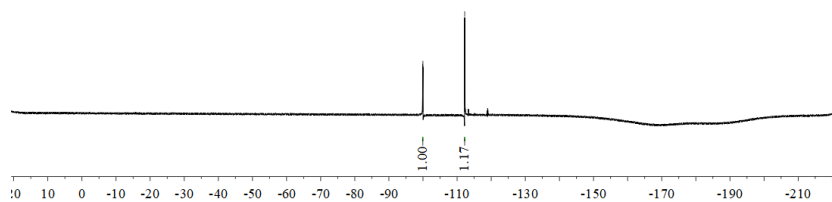

<sup>1</sup>H NMR (400 MHz, CDCl<sub>3</sub>) (16)

7.47  
7.46  
7.46  
7.45  
7.45  
7.42  
7.41  
7.41  
7.40  
7.28  
7.28  
7.27  
7.27  
7.26  
5.28  
5.26  
5.18  
5.16  
2.69  
1.86  
1.85  
1.84  
1.84  
1.82  
1.82  
1.78  
1.77  
1.77  
1.75  
1.74  
1.73  
1.71  
1.71  
1.70  
1.68  
1.67  
1.41  
1.40  
1.39  
1.38  
1.37  
1.37  
1.36  
1.34  
1.29  
1.28  
1.26  
1.25  
1.23  
1.20  
1.19

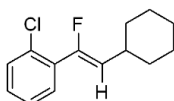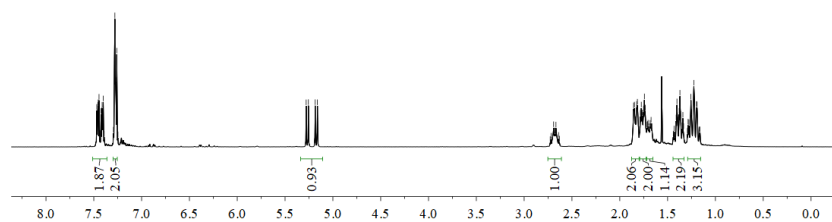

<sup>13</sup>C NMR (101 MHz, CDCl<sub>3</sub>) (16)

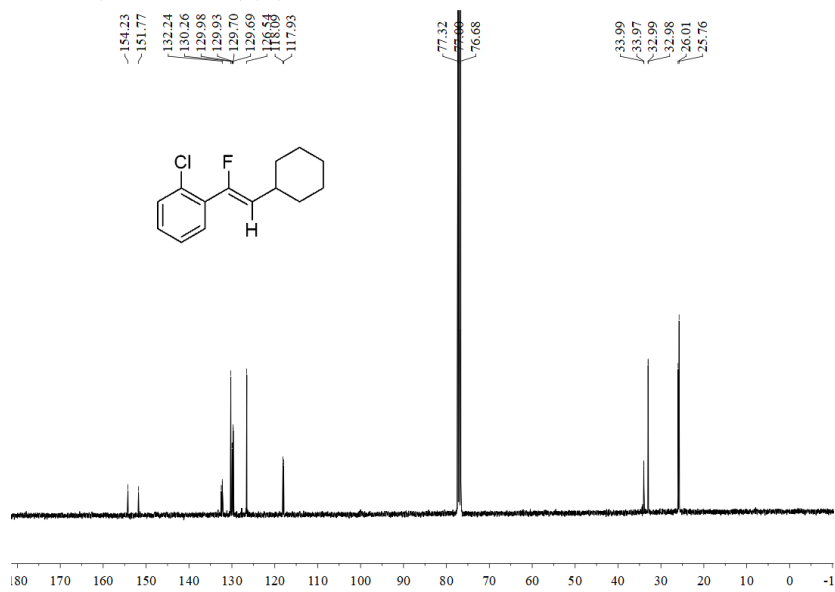

<sup>19</sup>F NMR (376 MHz, CDCl<sub>3</sub>) (16)

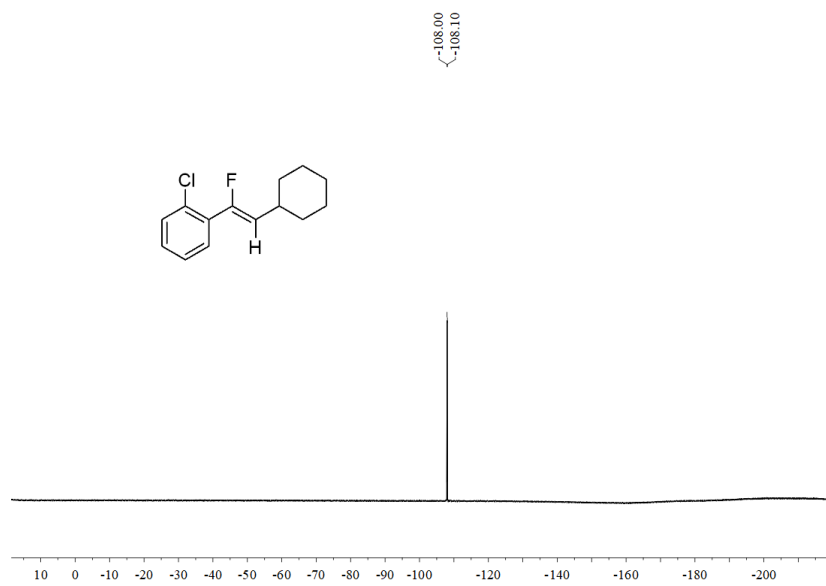

**<sup>1</sup>H NMR (500 MHz, CDCl<sub>3</sub>) (17)**

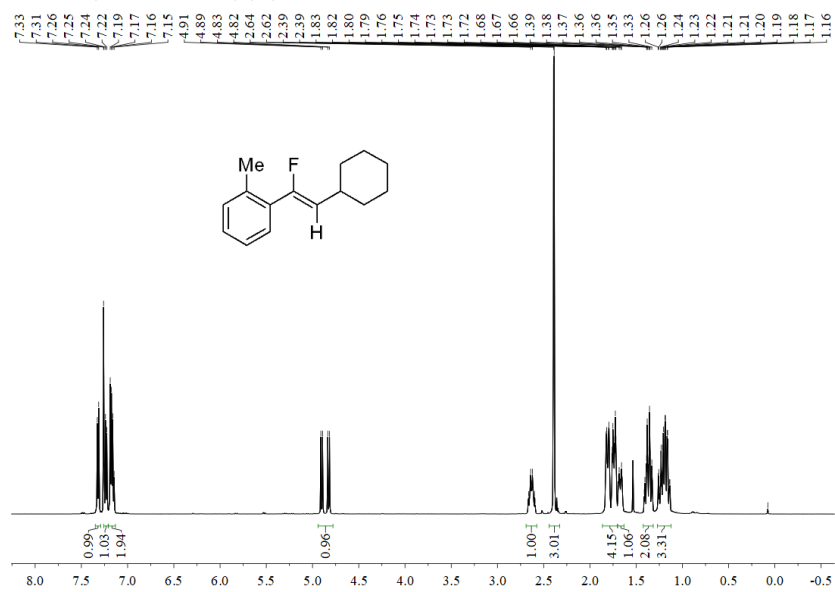

**<sup>13</sup>C NMR (126 MHz, CDCl<sub>3</sub>) (17)**

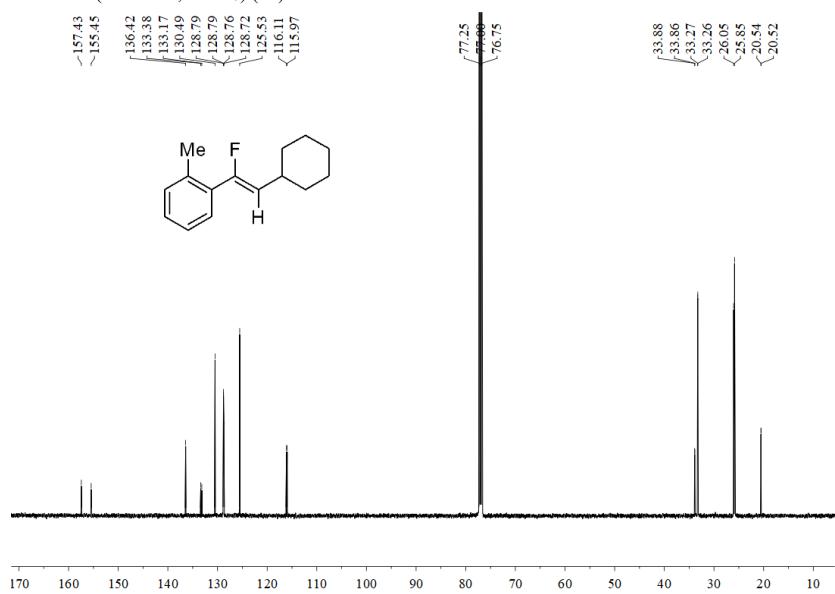

<sup>19</sup>F NMR (471 MHz, CDCl<sub>3</sub>) (17)

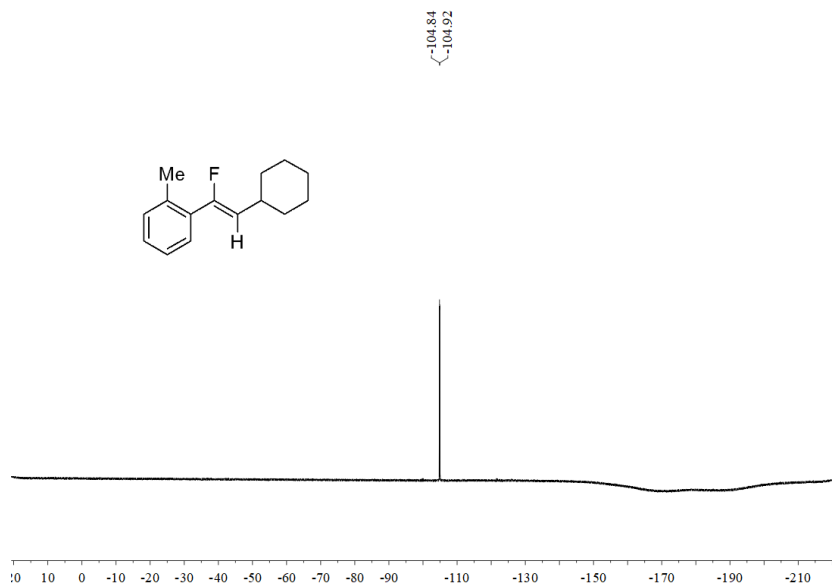

<sup>1</sup>H NMR (500 MHz, CDCl<sub>3</sub>) (18)

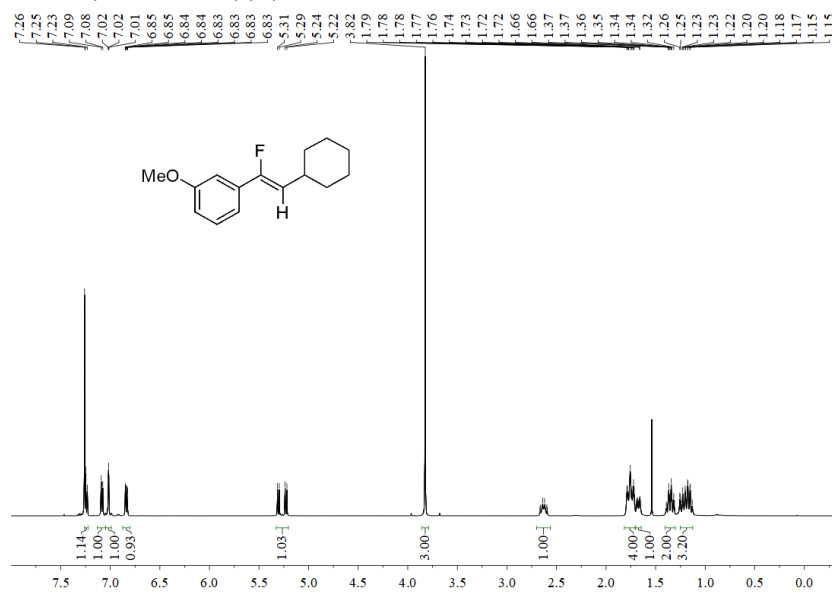

<sup>13</sup>C NMR (126 MHz, CDCl<sub>3</sub>) (18)

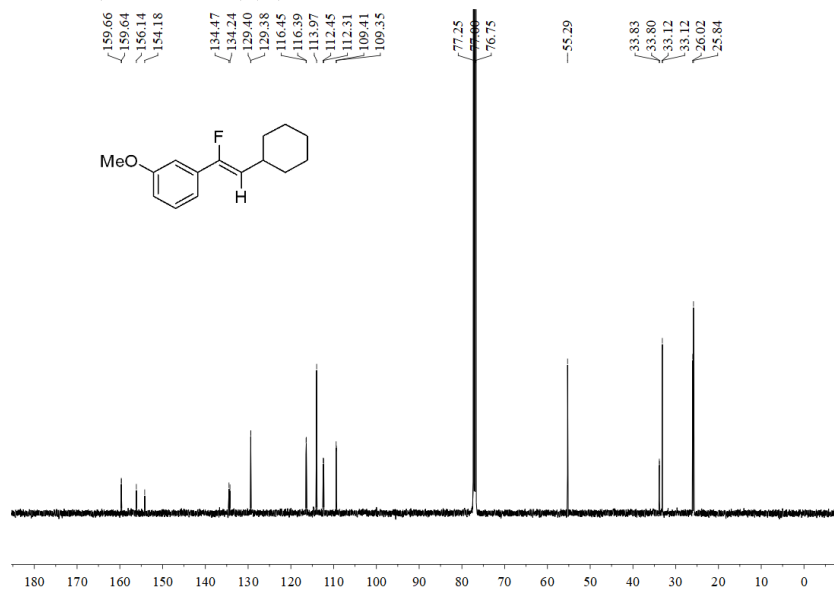

<sup>19</sup>F NMR (471 MHz, CDCl<sub>3</sub>) (18)

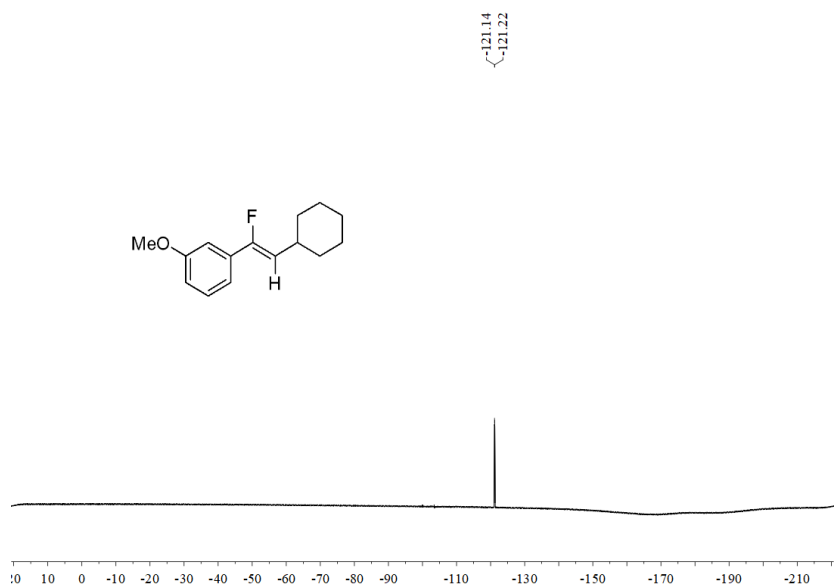

**<sup>1</sup>H NMR (400 MHz, CDCl<sub>3</sub>) (19)**

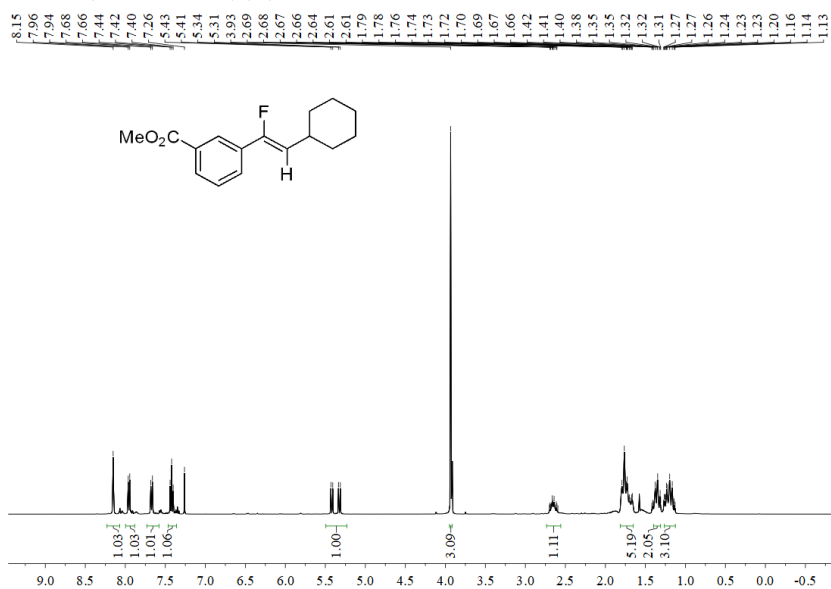

**<sup>13</sup>C NMR (101 MHz, CDCl<sub>3</sub>) (19)**

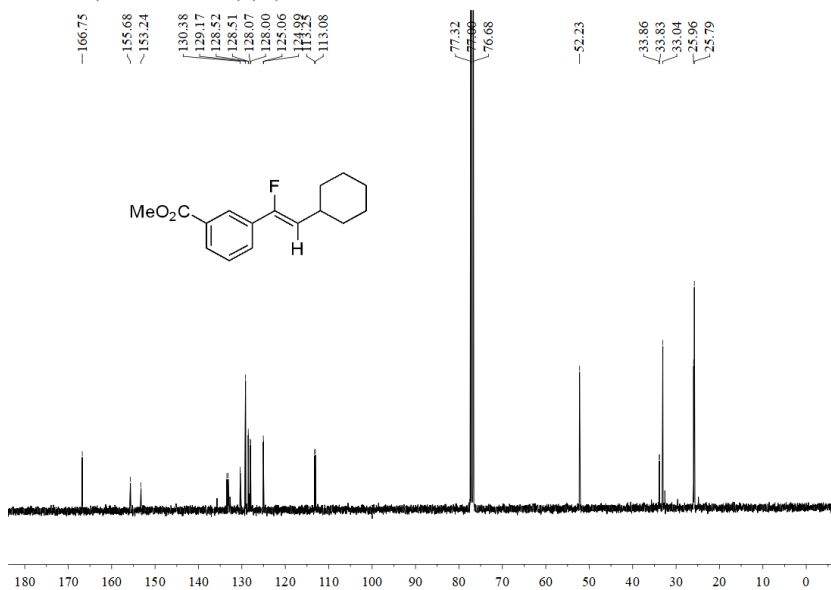

<sup>19</sup>F NMR (376 MHz, CDCl<sub>3</sub>) (19)

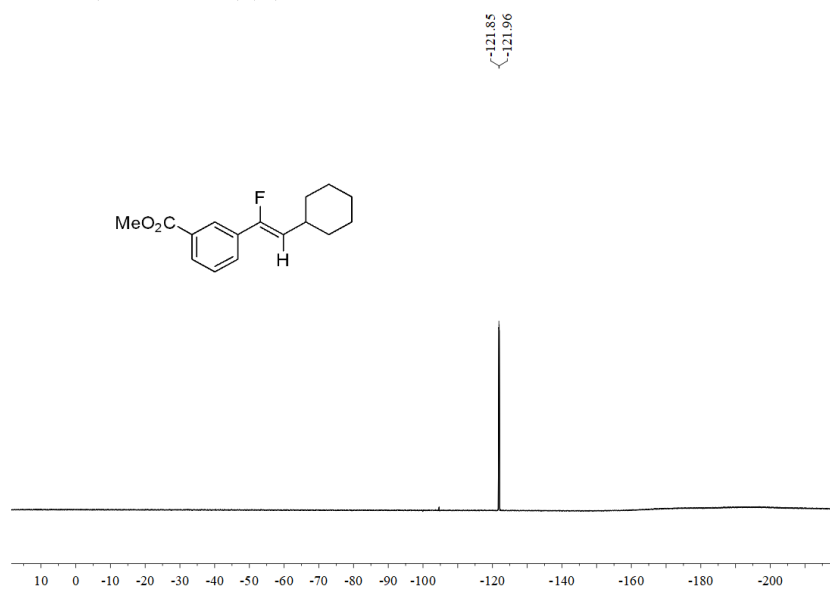

<sup>1</sup>H NMR (400 MHz, CDCl<sub>3</sub>) (20)

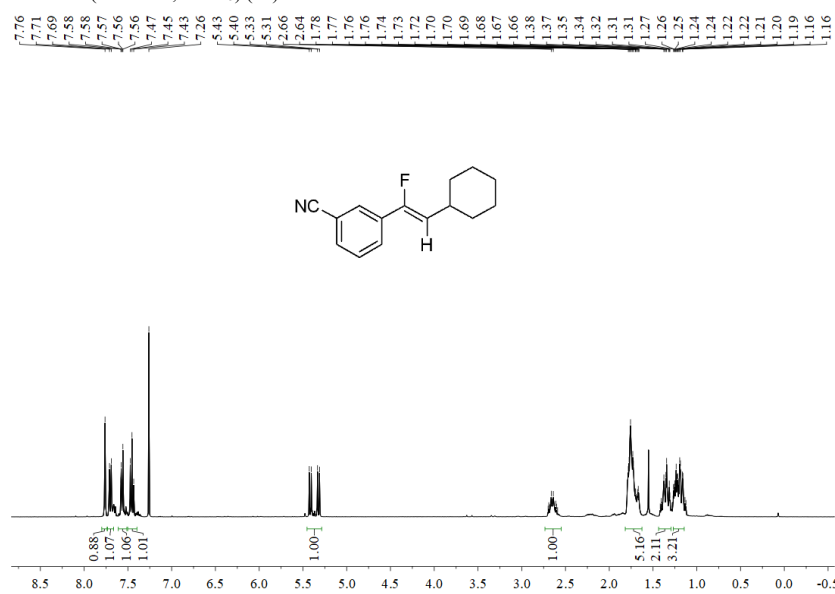



<sup>13</sup>C NMR (101 MHz, CDCl<sub>3</sub>) (20)

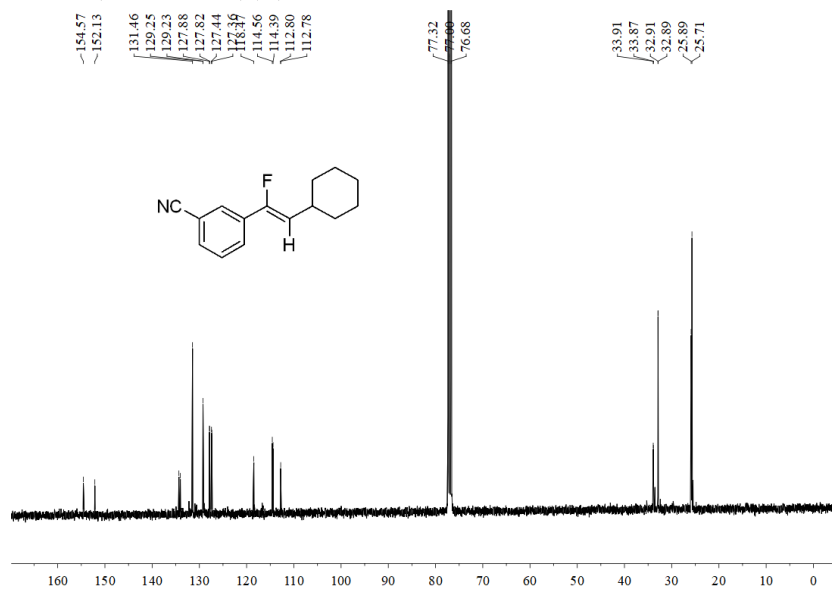

<sup>19</sup>F NMR (376 MHz, CDCl<sub>3</sub>) (20)

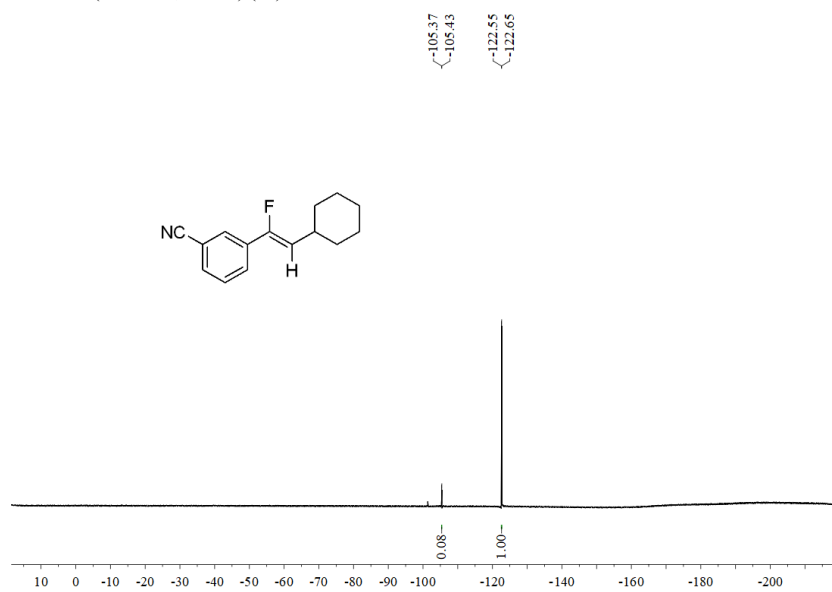

**<sup>1</sup>H NMR (500 MHz, CDCl<sub>3</sub>) (21)**

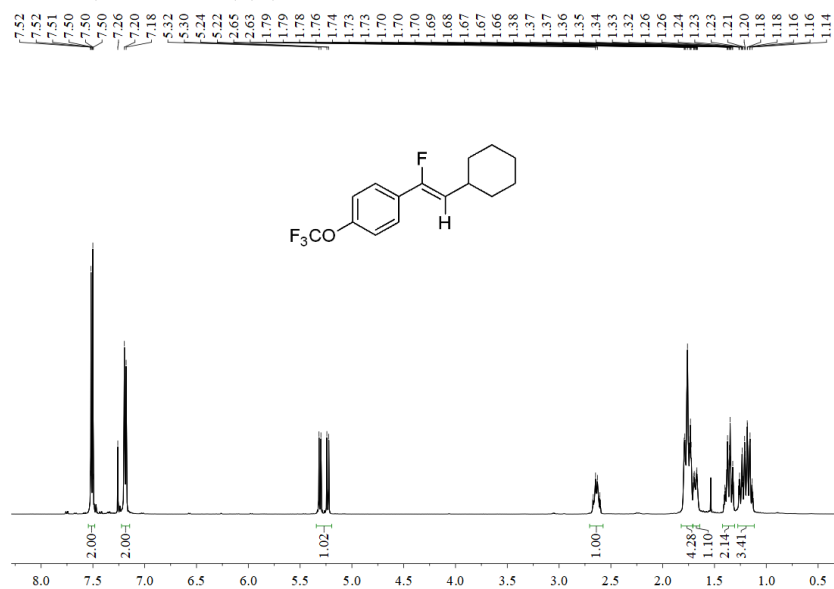

**<sup>13</sup>C NMR (126 MHz, CDCl<sub>3</sub>) (21)**

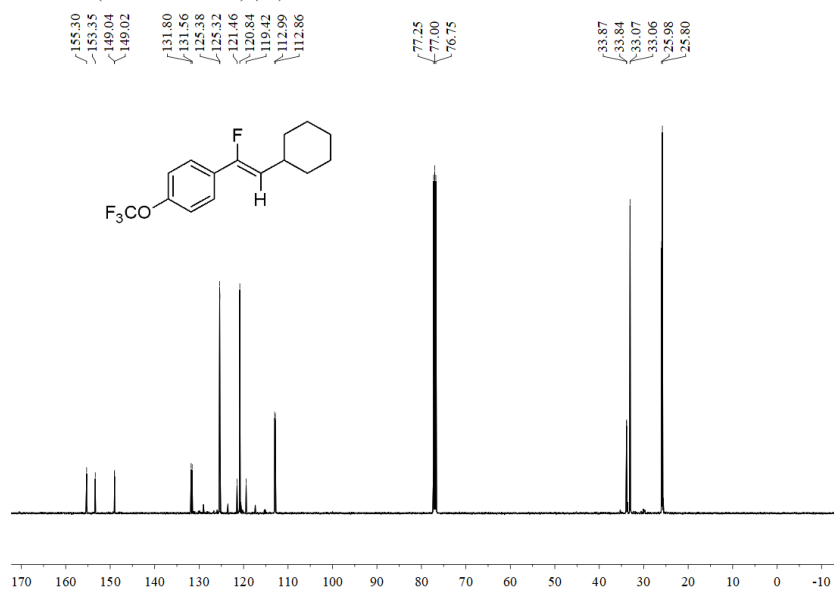

<sup>19</sup>F NMR (471 MHz, CDCl<sub>3</sub>) (21)

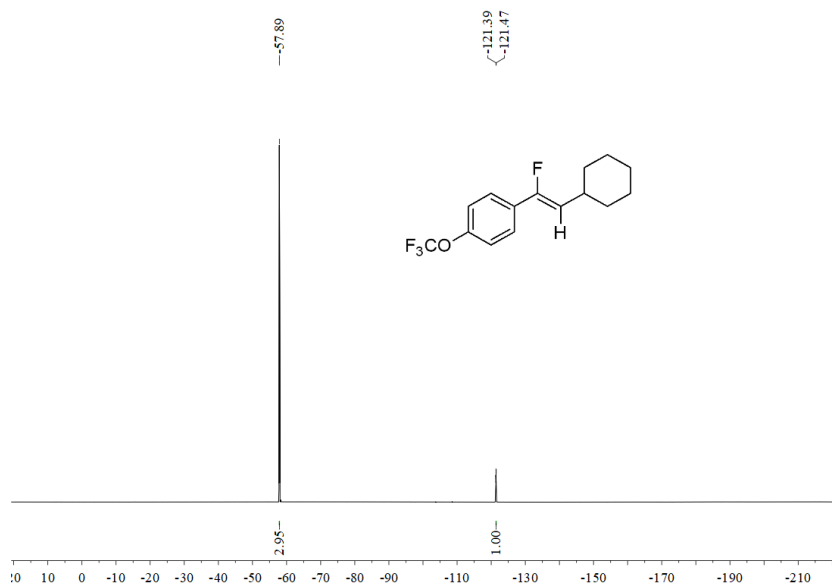

<sup>1</sup>H NMR (400 MHz, CDCl<sub>3</sub>) (22)

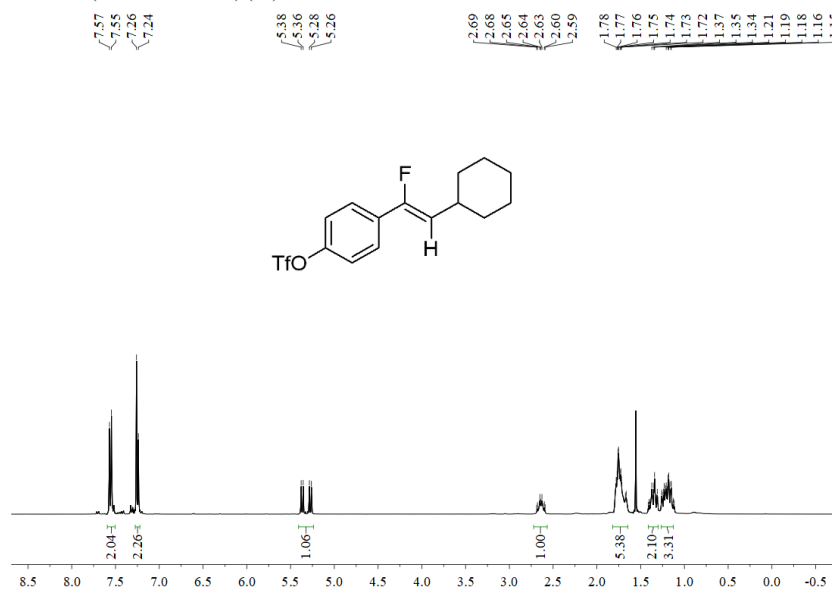

<sup>13</sup>C NMR (101 MHz, CDCl<sub>3</sub>) (22)

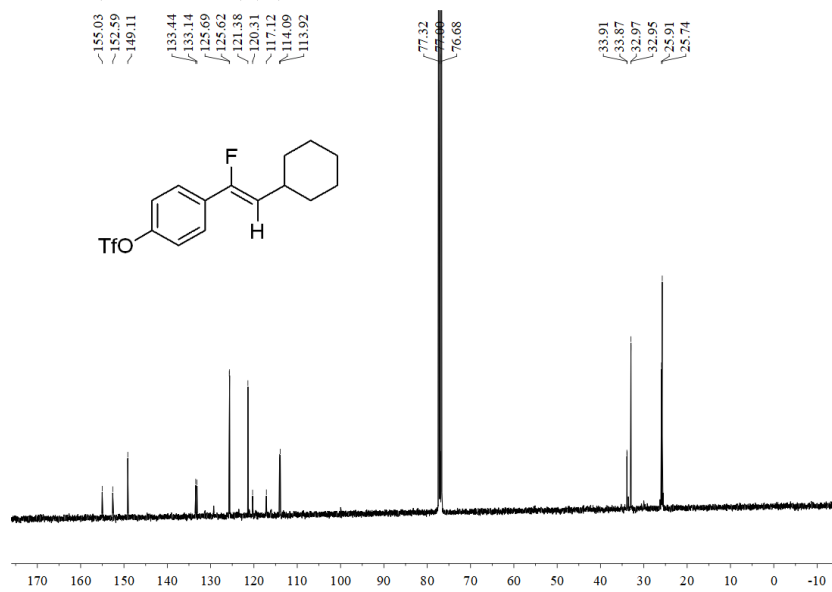

<sup>19</sup>F NMR (376 MHz, CDCl<sub>3</sub>) (22)

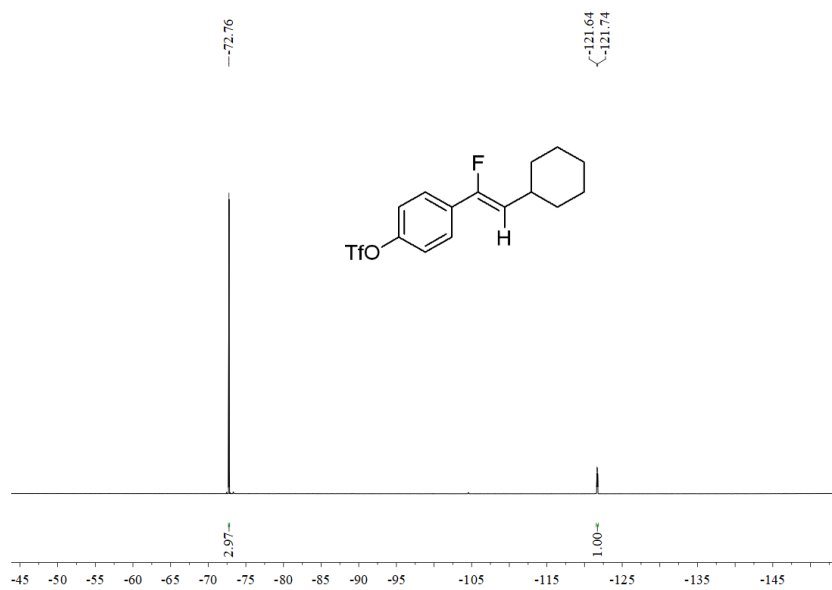

**<sup>1</sup>H NMR (300 MHz, CDCl<sub>3</sub>) (23)**

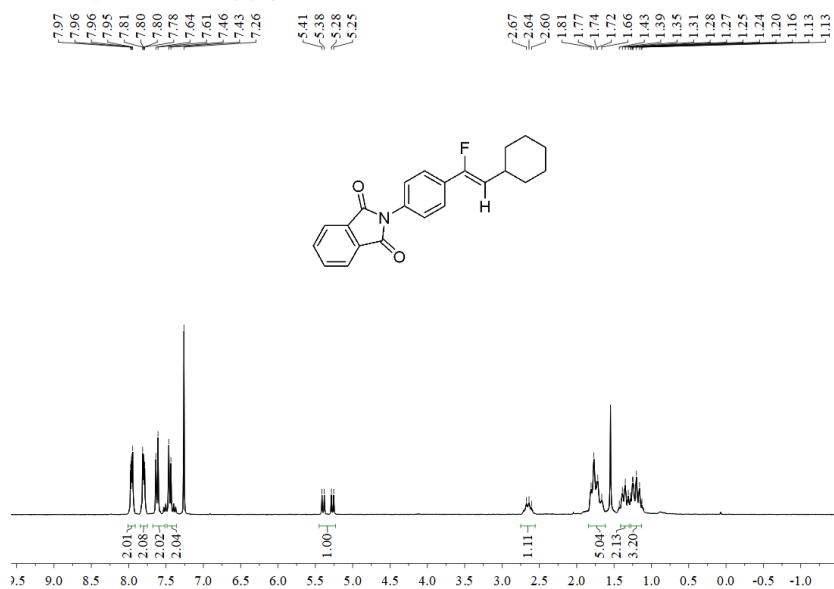

**<sup>13</sup>C NMR (126 MHz, CDCl<sub>3</sub>) (23)**

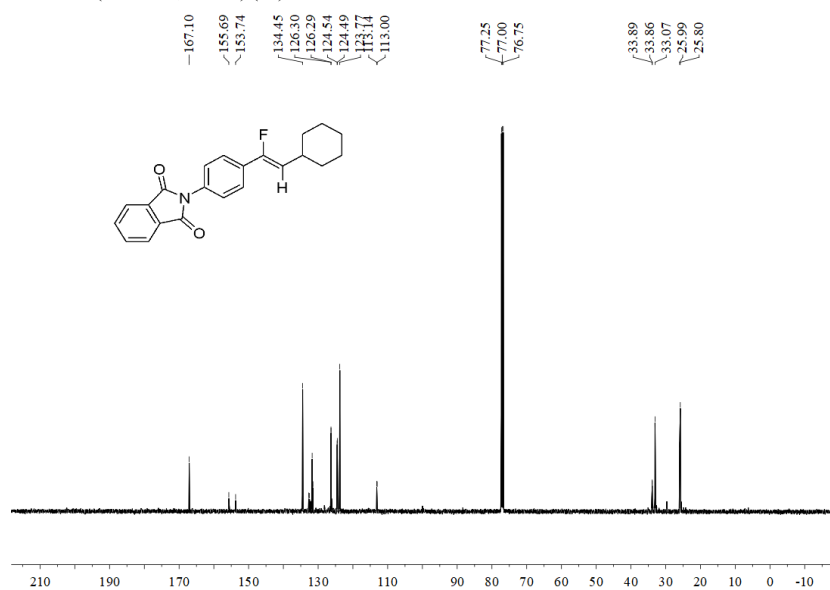

<sup>19</sup>F NMR (471 MHz, CDCl<sub>3</sub>) (23)

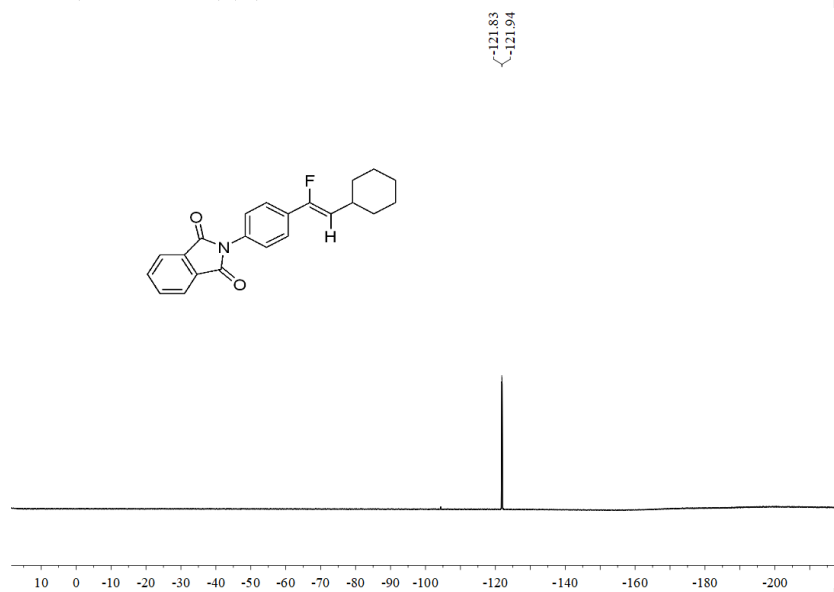

<sup>1</sup>H NMR (500 MHz, CDCl<sub>3</sub>) (24)

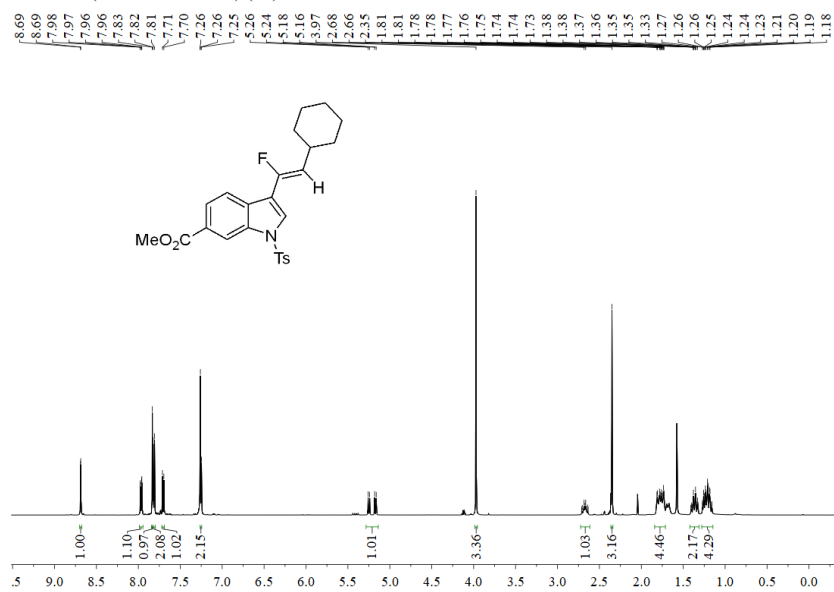

<sup>13</sup>C NMR (126 MHz, CDCl<sub>3</sub>) (24)

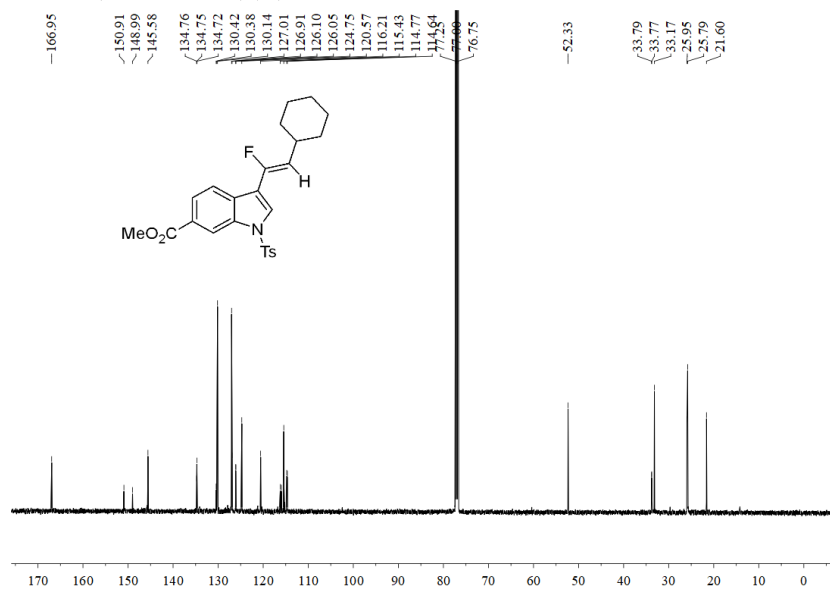

<sup>19</sup>F NMR (471 MHz, CDCl<sub>3</sub>) (24)

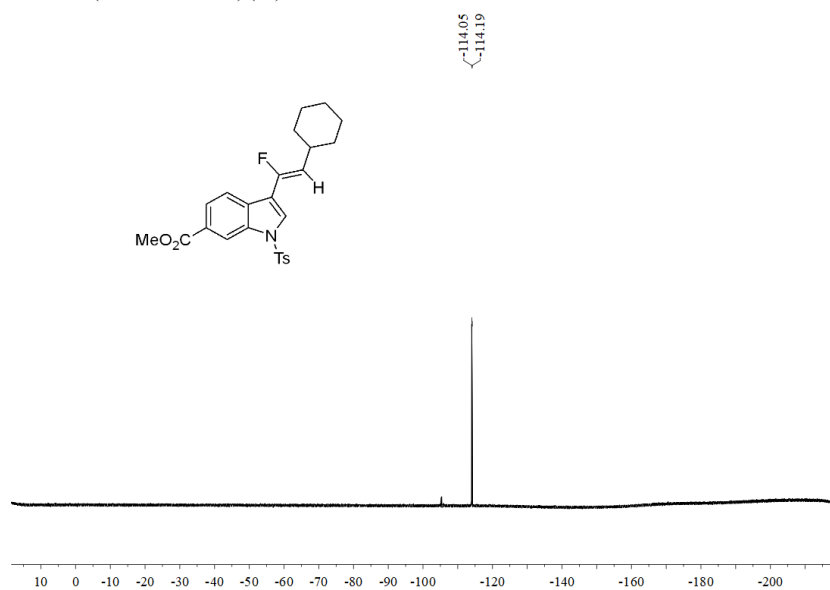

**<sup>1</sup>H NMR (500 MHz, CDCl<sub>3</sub>) (25)**

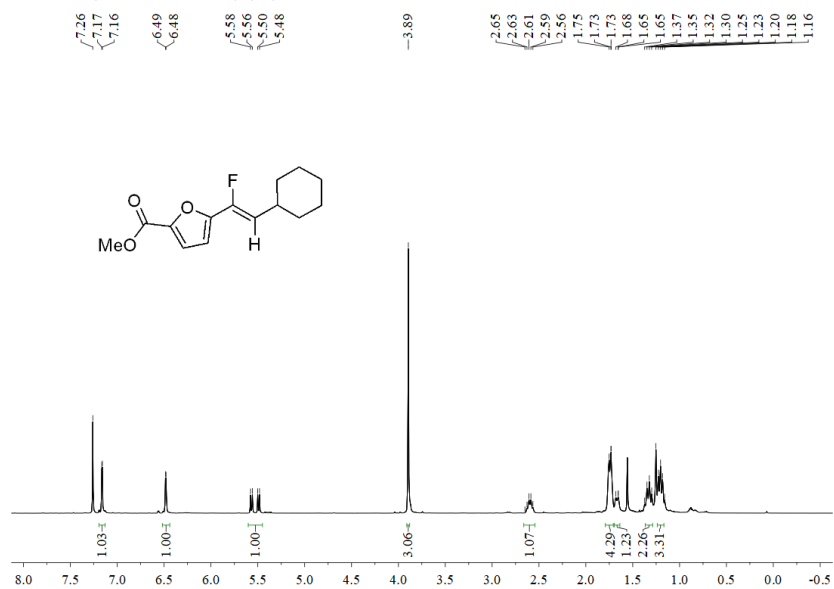

**<sup>13</sup>C NMR (126 MHz, CDCl<sub>3</sub>) (25)**

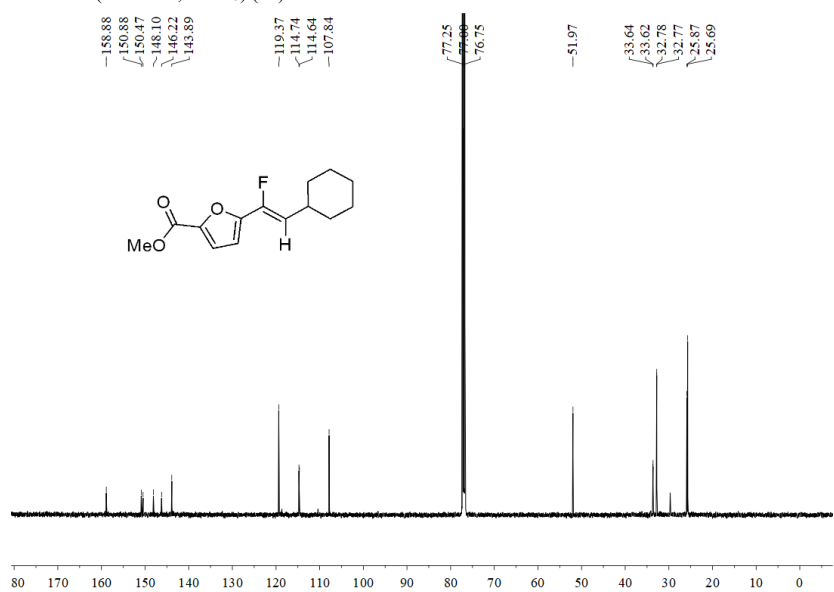



<sup>19</sup>F NMR (471 MHz, CDCl<sub>3</sub>) (25)

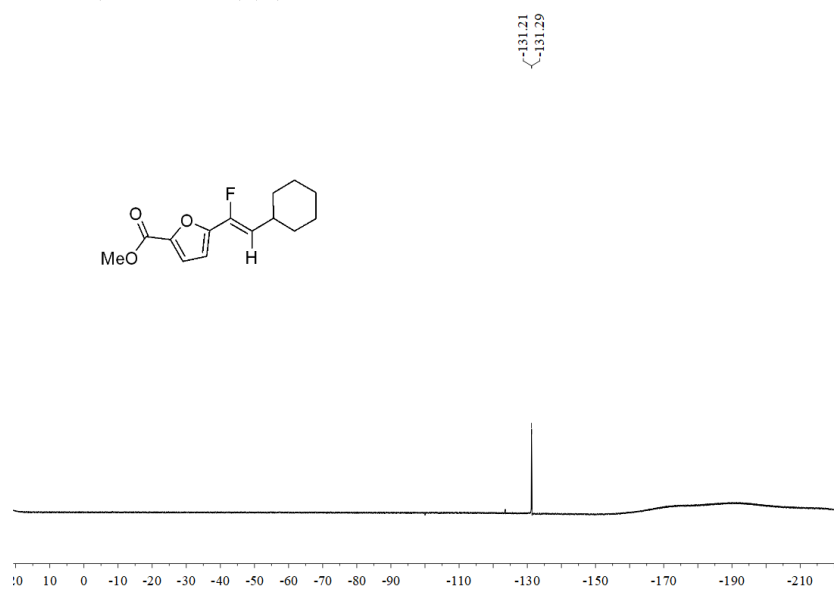

<sup>1</sup>H NMR (500 MHz, CDCl<sub>3</sub>) (26)

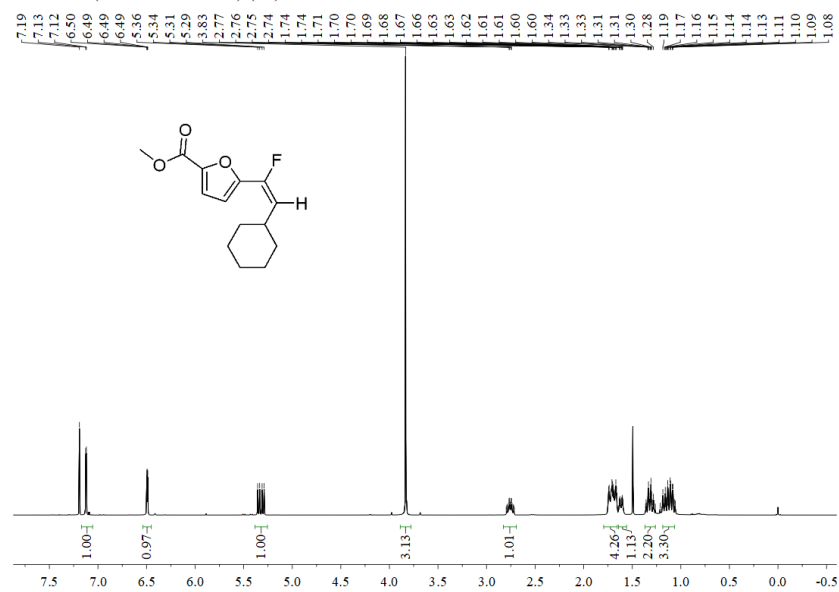

<sup>13</sup>C NMR (126 MHz, CDCl<sub>3</sub>) (26)

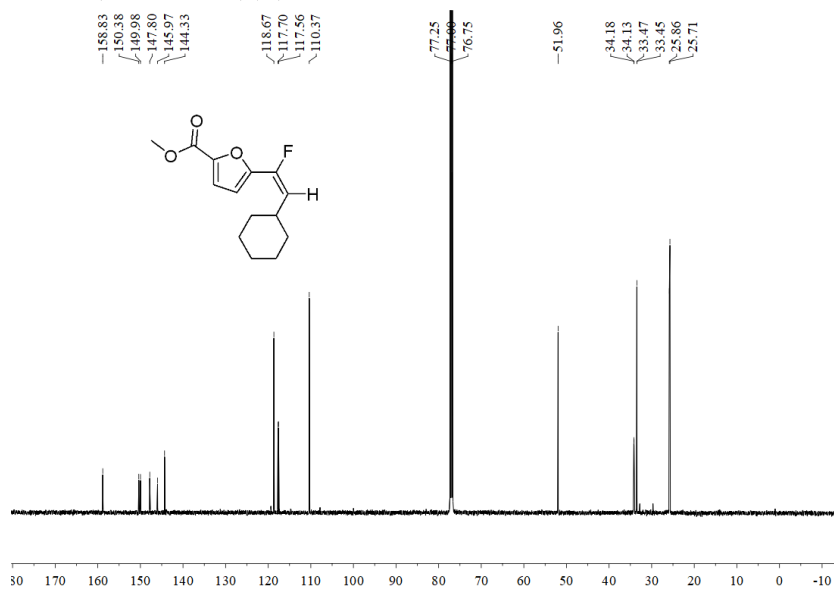

<sup>19</sup>F NMR (471 MHz, CDCl<sub>3</sub>) (26)

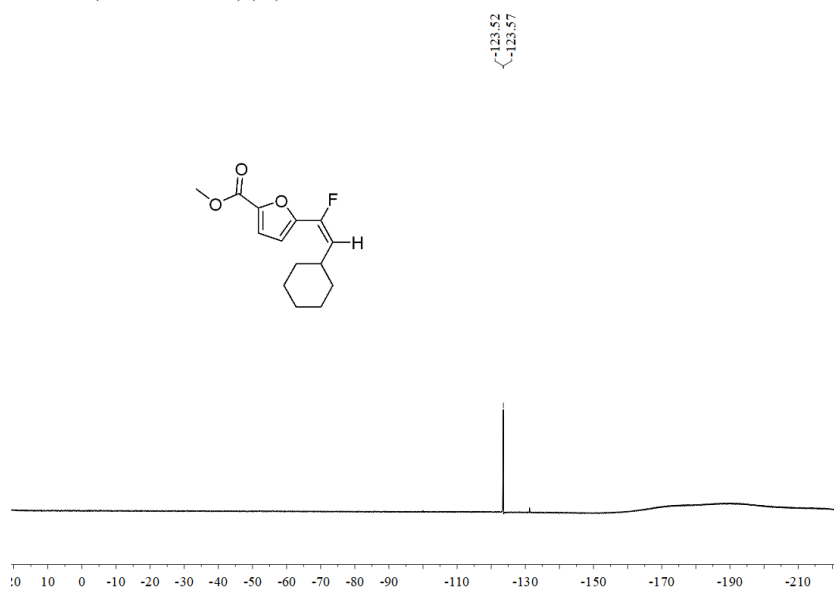

<sup>1</sup>H NMR (500 MHz, CDCl<sub>3</sub>) (27)

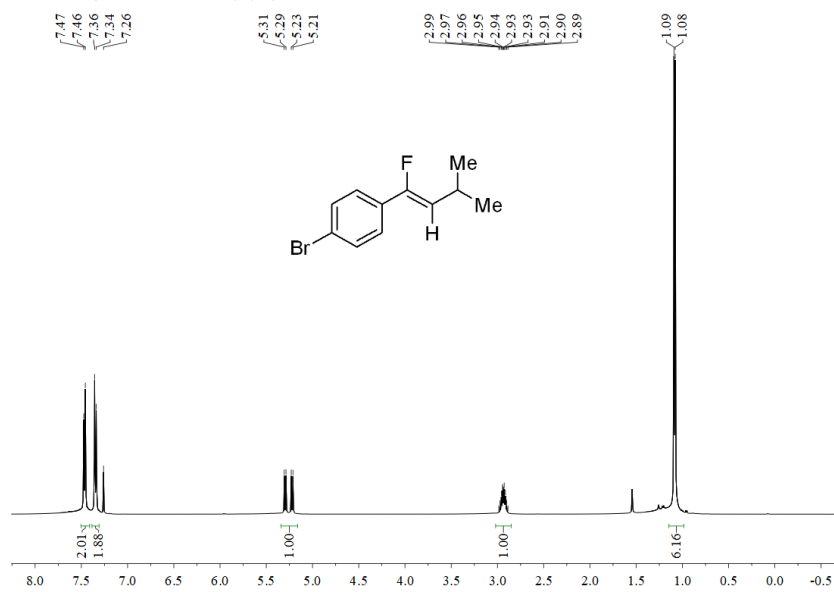

<sup>13</sup>C NMR (126 MHz, CDCl<sub>3</sub>) (27)

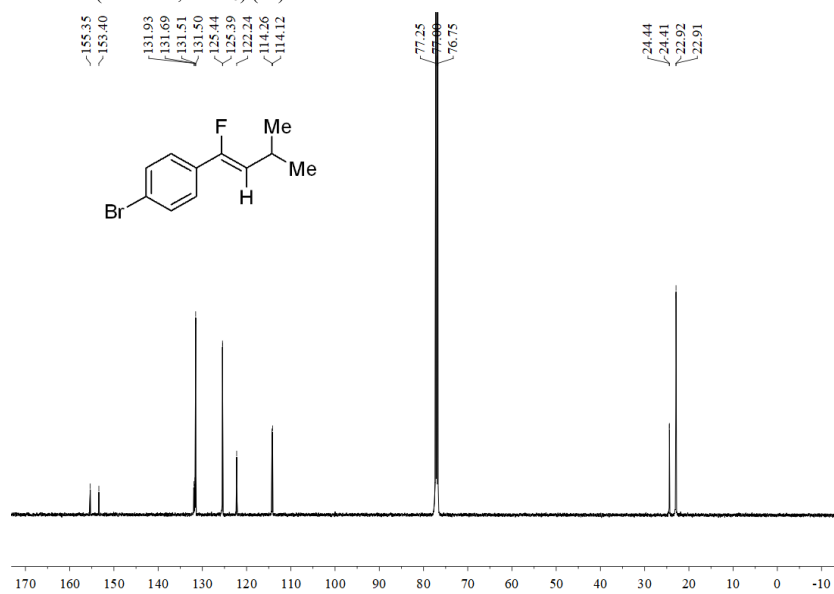

$^{19}\text{F}$  NMR (471 MHz,  $\text{CDCl}_3$ ) (27)

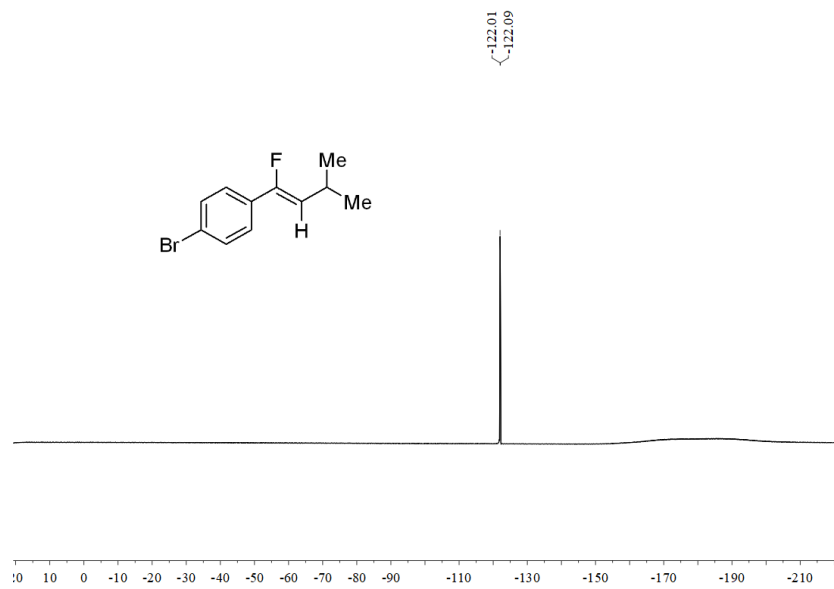

$^1\text{H}$  NMR (500 MHz,  $\text{CDCl}_3$ ) (28)

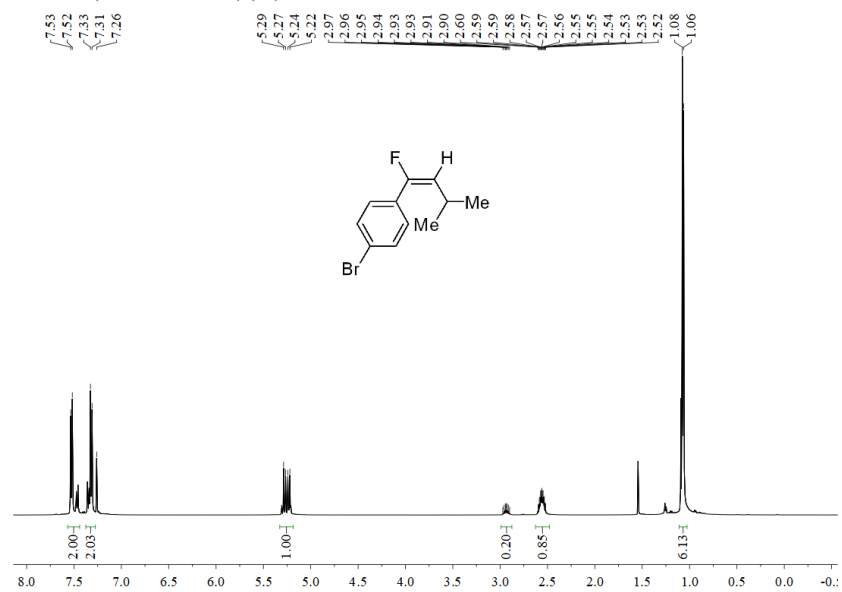

**<sup>13</sup>C NMR (126 MHz, CDCl<sub>3</sub>) (28)**

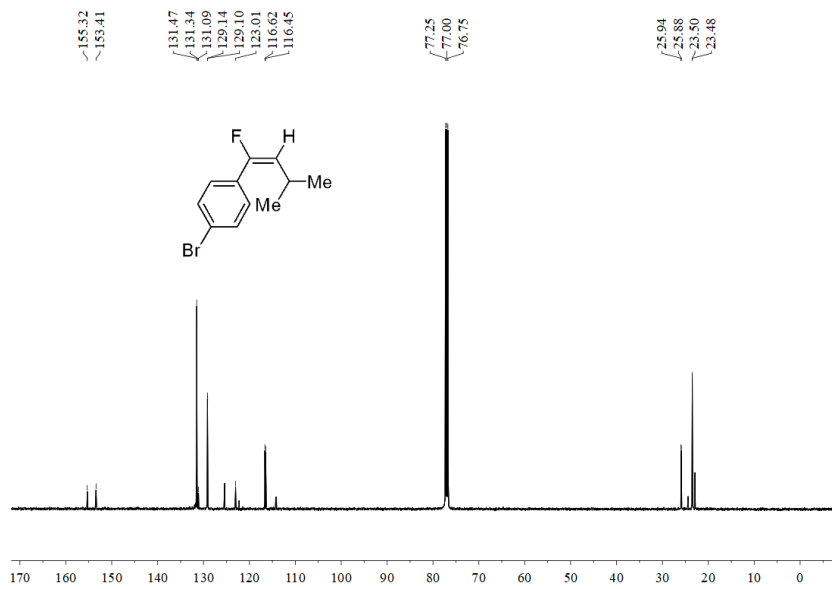

**<sup>19</sup>F NMR (471 MHz, CDCl<sub>3</sub>) (28)**

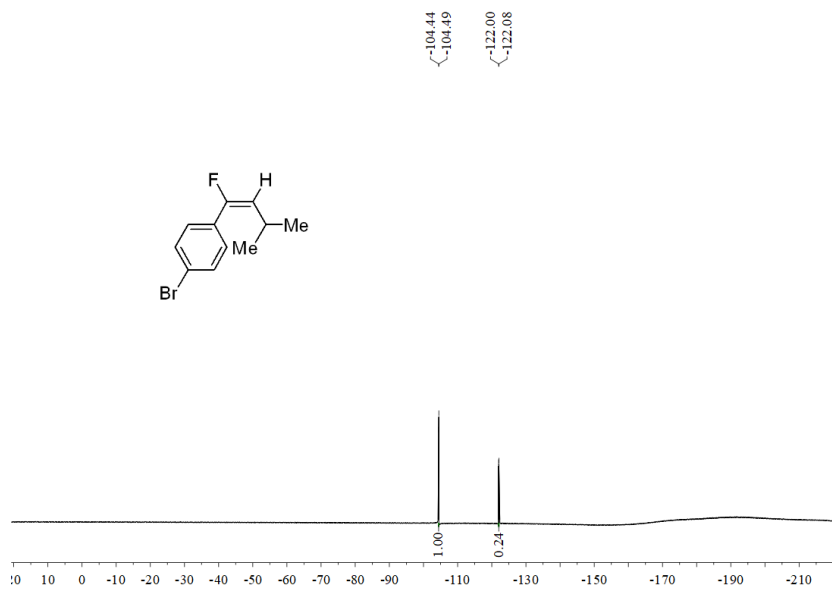

**<sup>1</sup>H NMR (500 MHz, CDCl<sub>3</sub>) (29)**

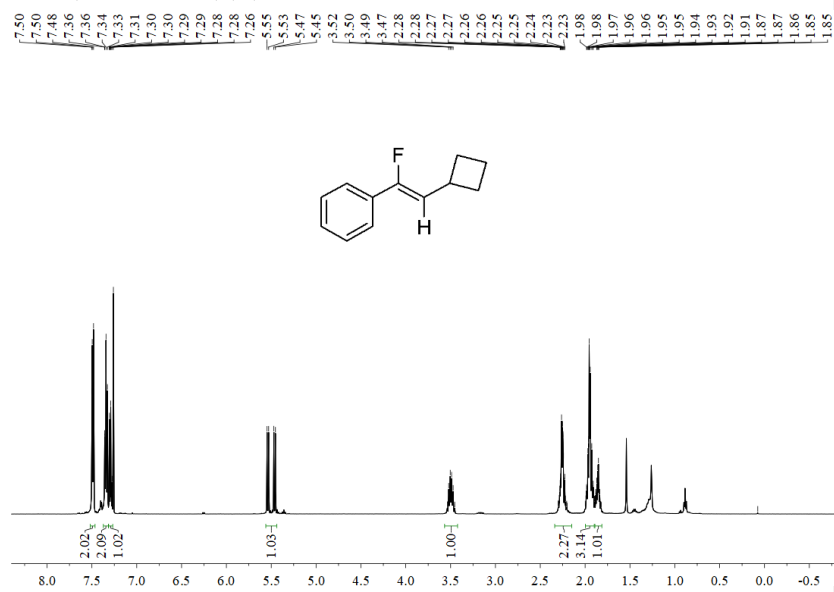

**<sup>13</sup>C NMR (126 MHz, CDCl<sub>3</sub>) (29)**

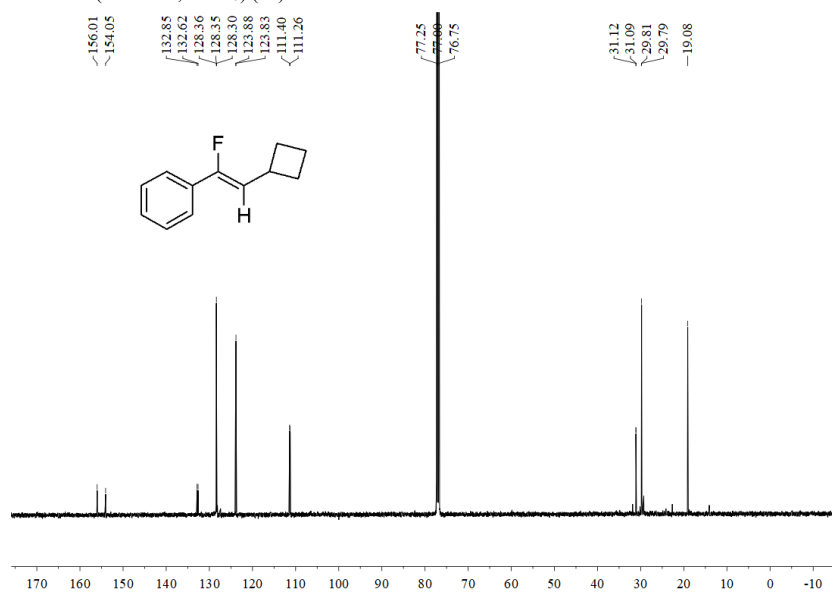

$^{19}\text{F}$  NMR (471 MHz,  $\text{CDCl}_3$ ) (29)

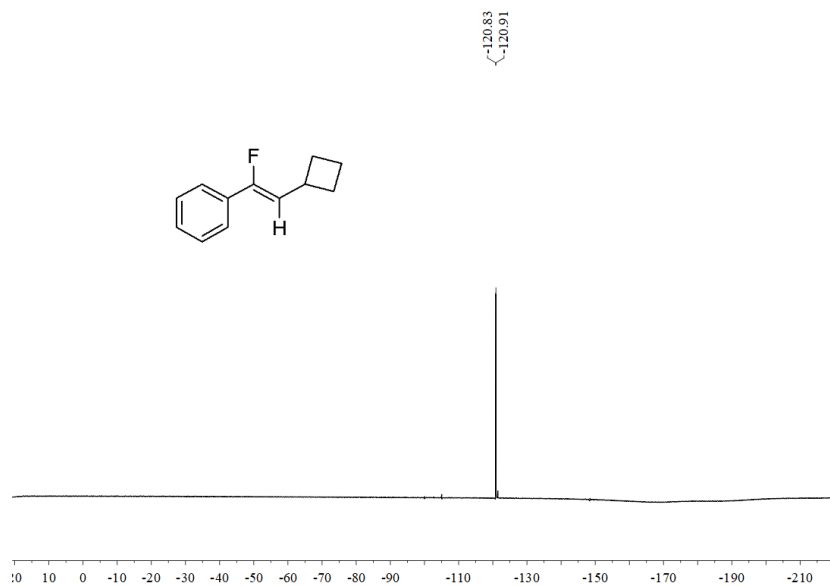

$^1\text{H}$  NMR (500 MHz,  $\text{CDCl}_3$ ) (30)

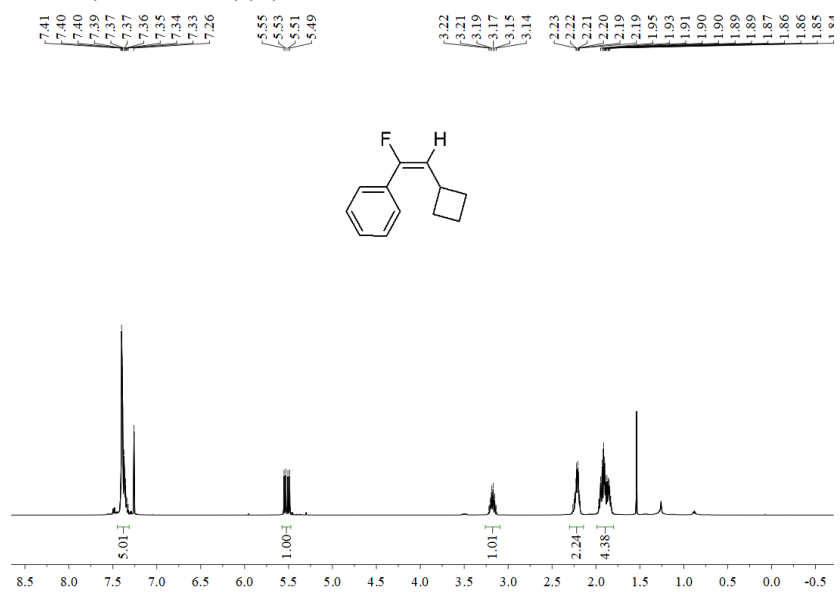

<sup>13</sup>C NMR (126 MHz, CDCl<sub>3</sub>) (30)

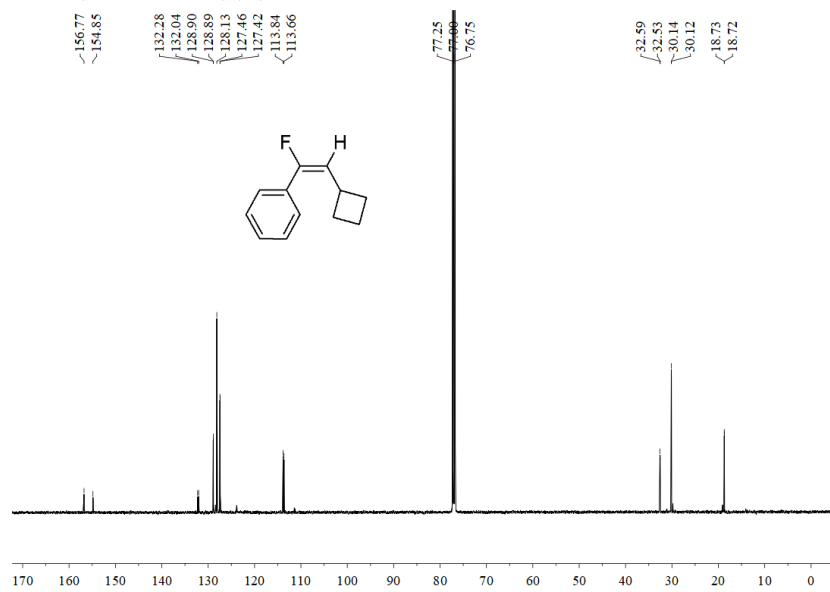

<sup>19</sup>F NMR (471 MHz, CDCl<sub>3</sub>) (30)

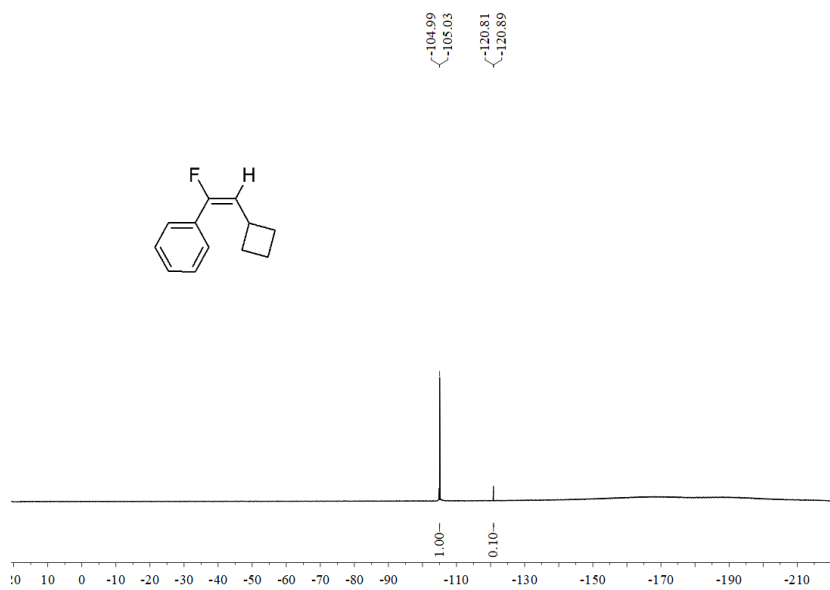



**<sup>1</sup>H NMR (500 MHz, CDCl<sub>3</sub>) (31)**

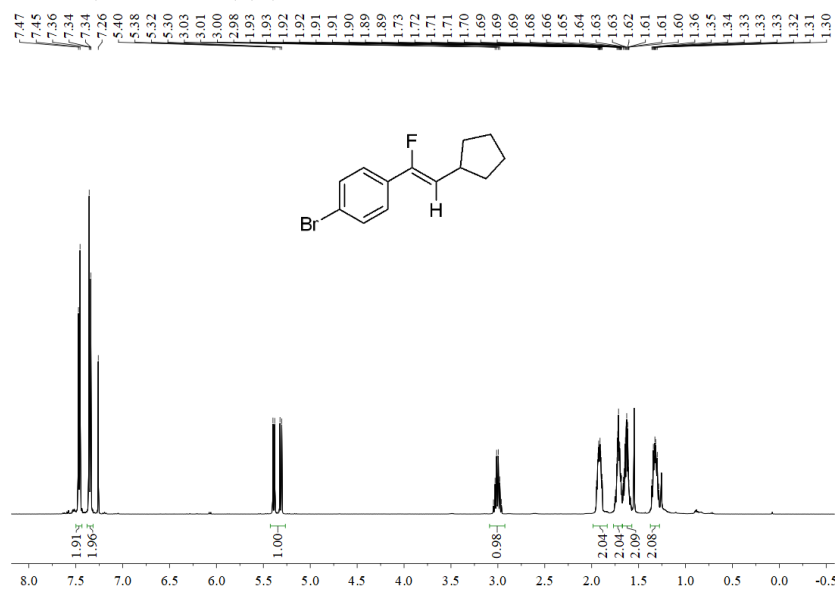

**<sup>13</sup>C NMR (126 MHz, CDCl<sub>3</sub>) (31)**

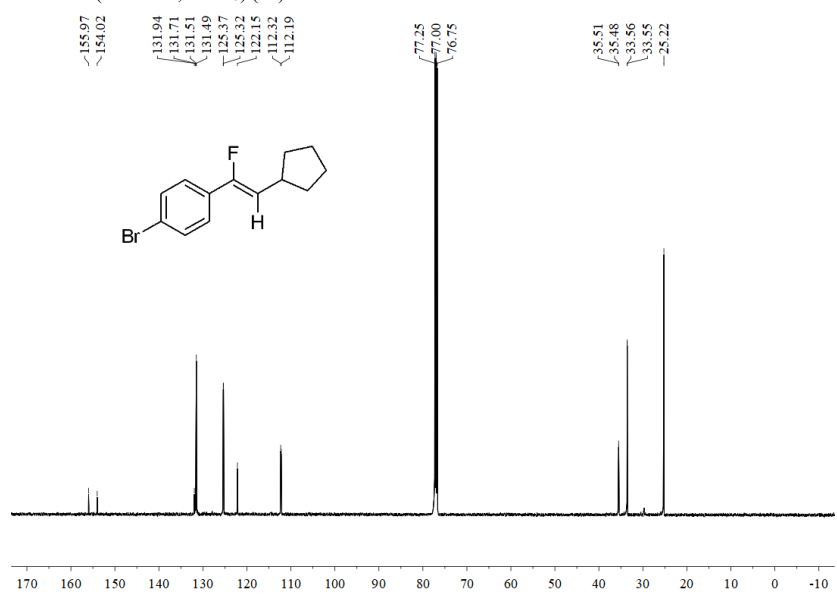

<sup>19</sup>F NMR (471 MHz, CDCl<sub>3</sub>) (31)

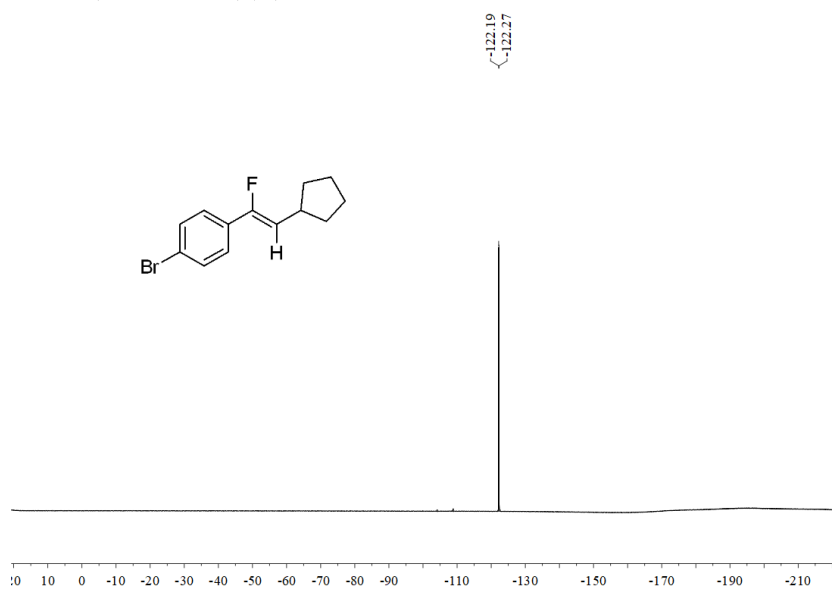

<sup>1</sup>H NMR (500 MHz, CDCl<sub>3</sub>) (32)

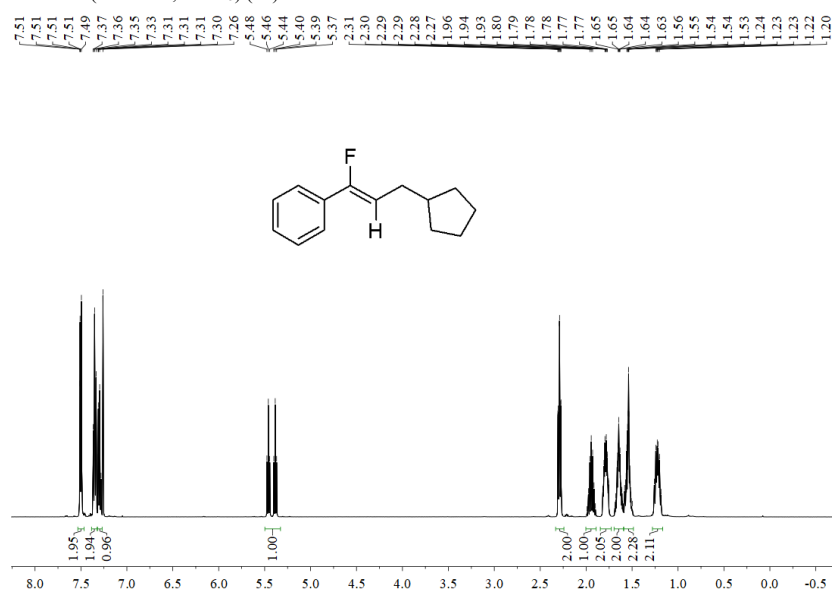

<sup>13</sup>C NMR (126 MHz, CDCl<sub>3</sub>) (32)

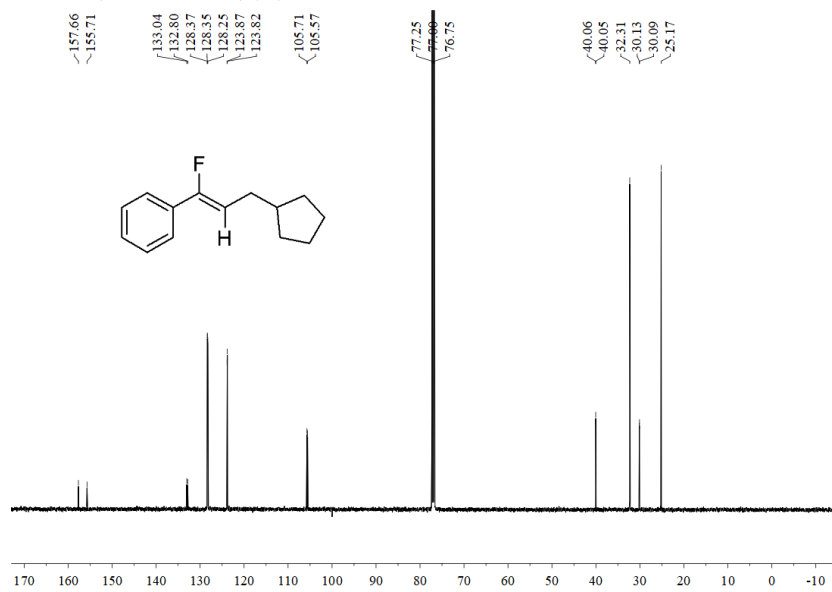

<sup>19</sup>F NMR (471 MHz, CDCl<sub>3</sub>) (32)

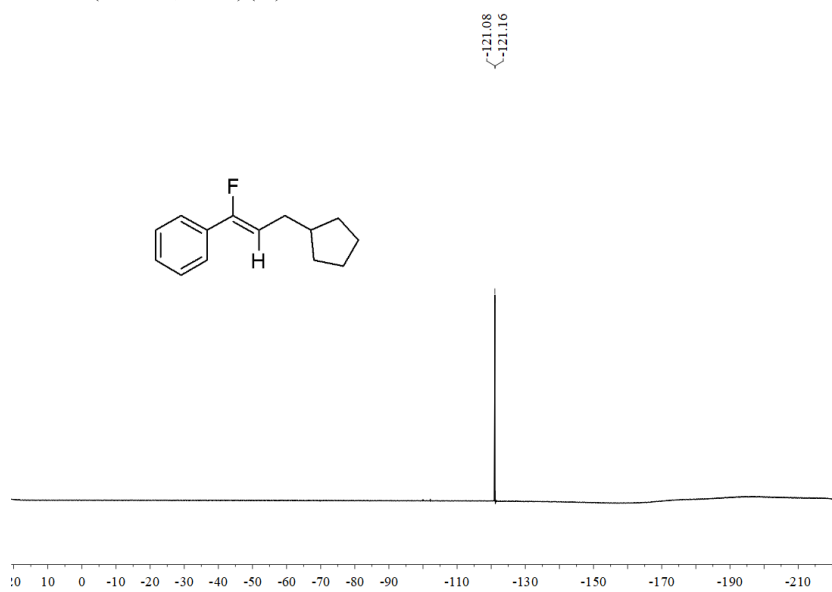

**<sup>1</sup>H NMR (500 MHz, CDCl<sub>3</sub>) (33)**

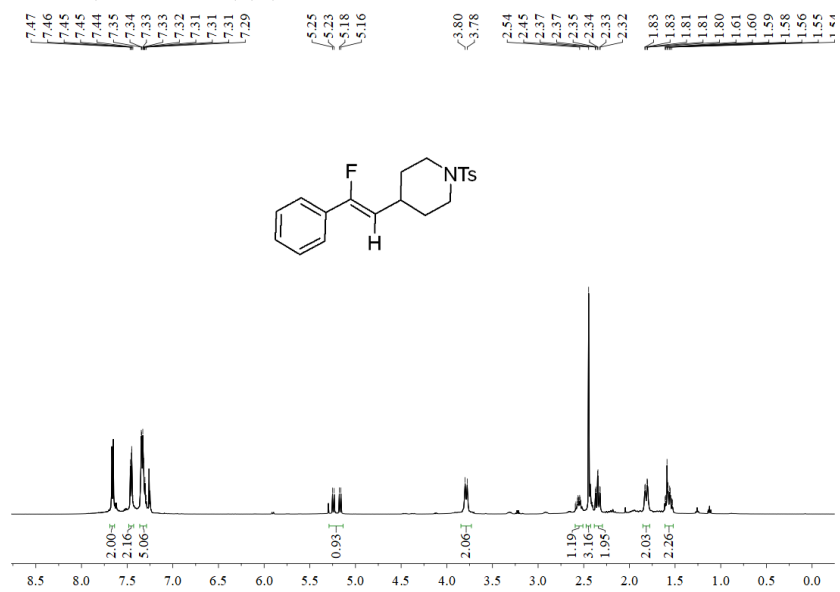

**<sup>13</sup>C NMR (126 MHz, CDCl<sub>3</sub>) (33)**

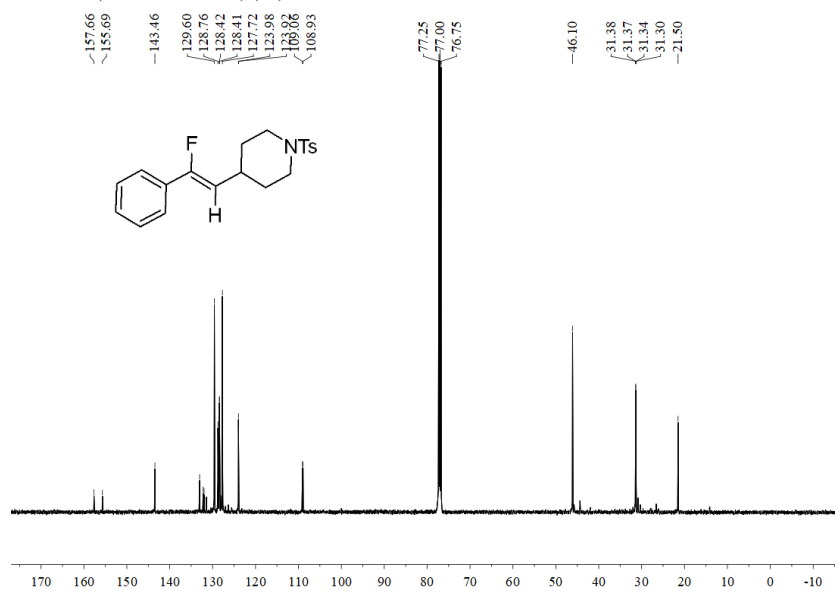

<sup>19</sup>F NMR (376 MHz, CDCl<sub>3</sub>) (33)

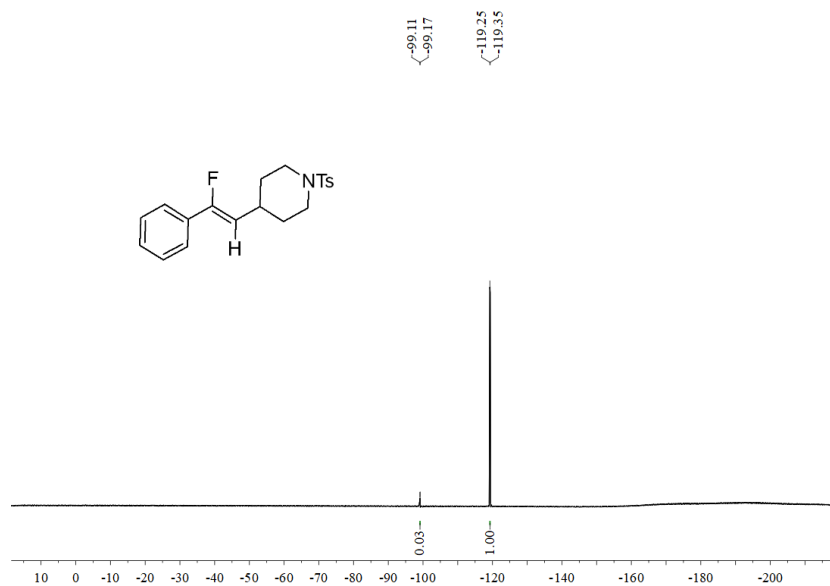

<sup>1</sup>H NMR (500 MHz, CDCl<sub>3</sub>) (34)

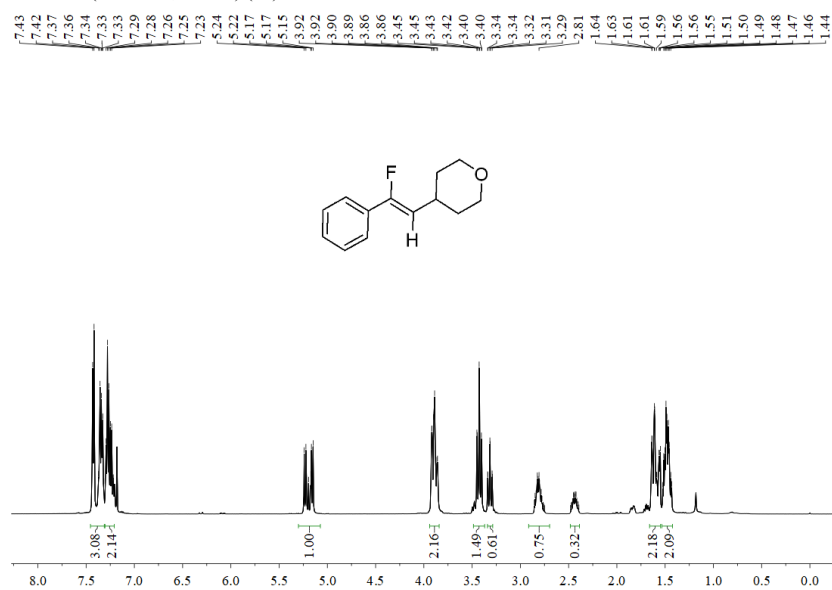

<sup>13</sup>C NMR (126 MHz, CDCl<sub>3</sub>) (34)

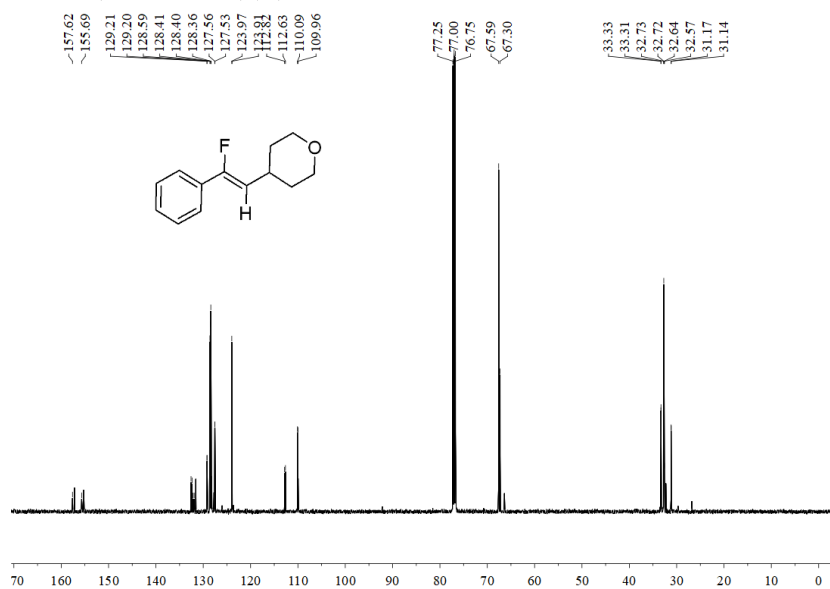

<sup>19</sup>F NMR (471 MHz, CDCl<sub>3</sub>) (34)

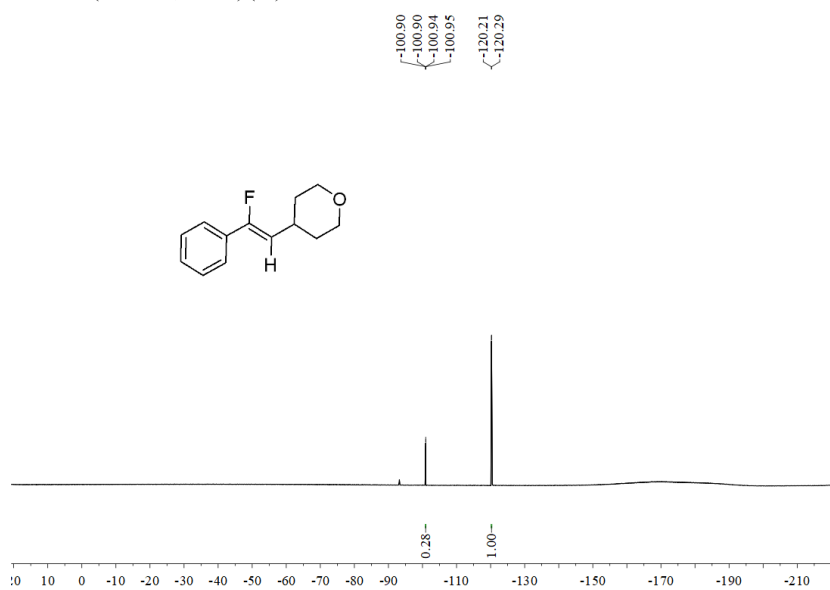

**<sup>1</sup>H NMR (500 MHz, CDCl<sub>3</sub>) (35)**

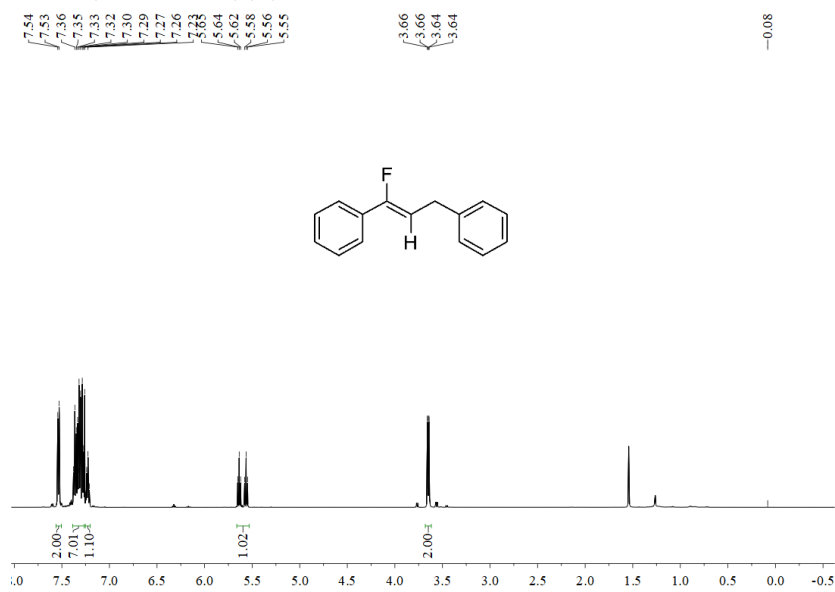

**<sup>13</sup>C NMR (126 MHz, CDCl<sub>3</sub>) (35)**

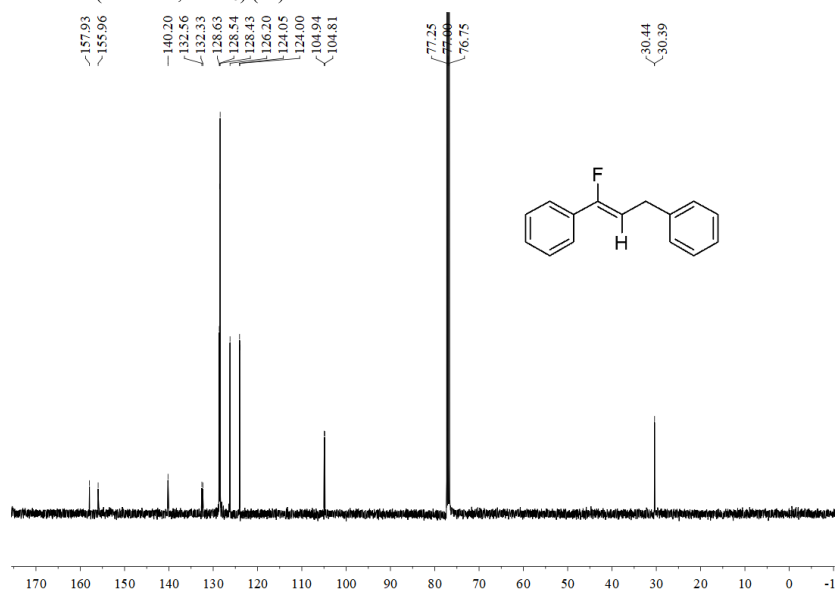

$^{19}\text{F}$  NMR (471 MHz,  $\text{CDCl}_3$ ) (35)

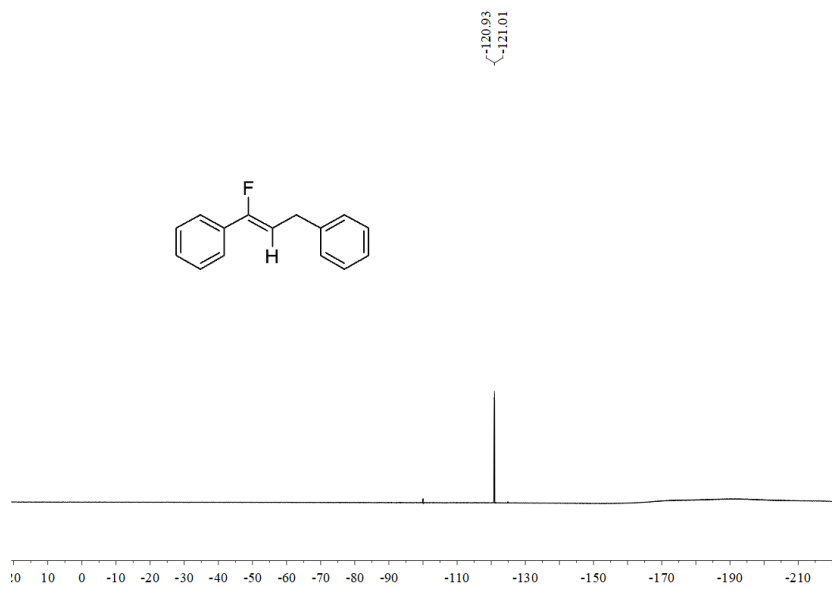

$^1\text{H}$  NMR (500 MHz,  $\text{CDCl}_3$ ) (36)

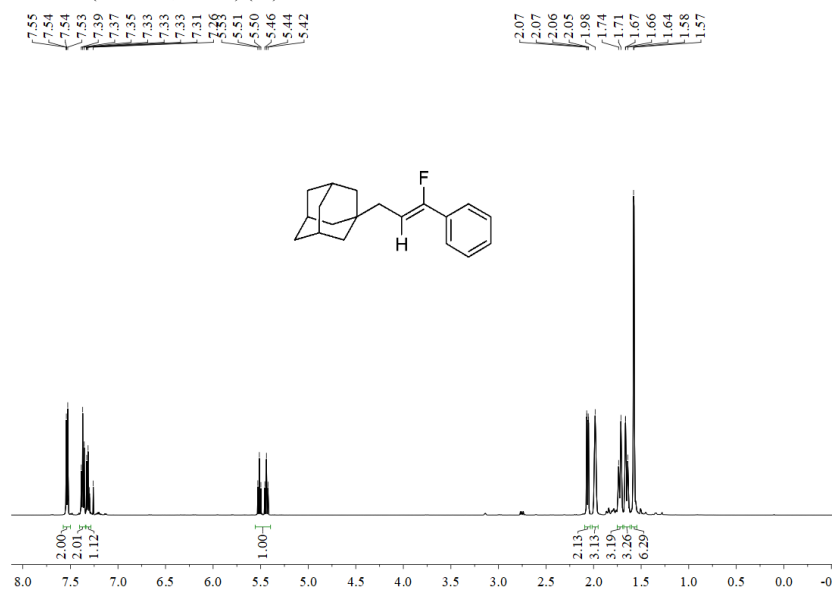



**<sup>13</sup>C NMR (126 MHz, CDCl<sub>3</sub>) (36)**

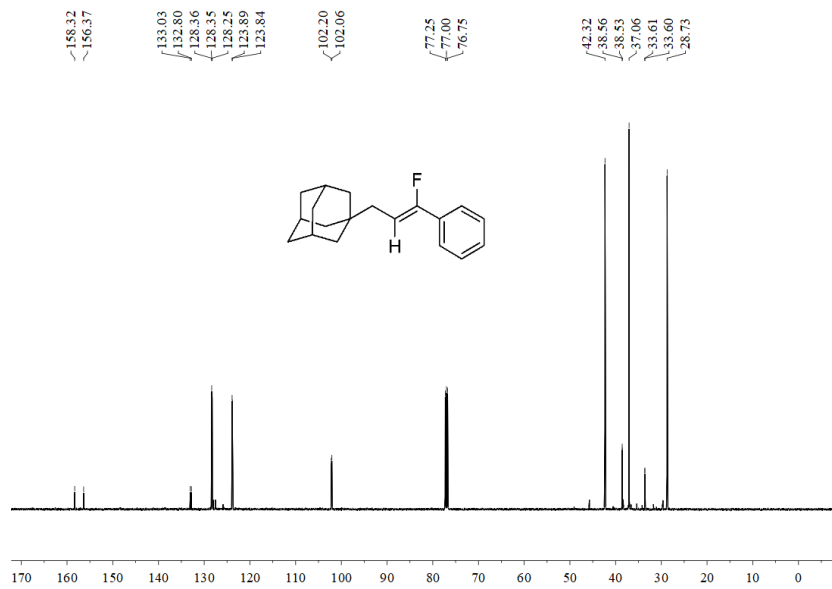

**<sup>19</sup>F NMR (471 MHz, CDCl<sub>3</sub>) (36)**

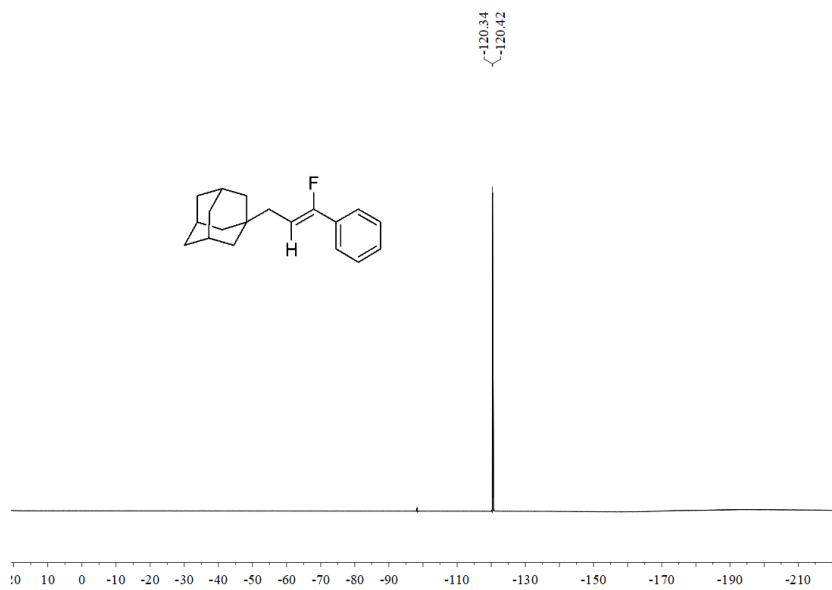

<sup>1</sup>H NMR (500 MHz, CDCl<sub>3</sub>) (37)

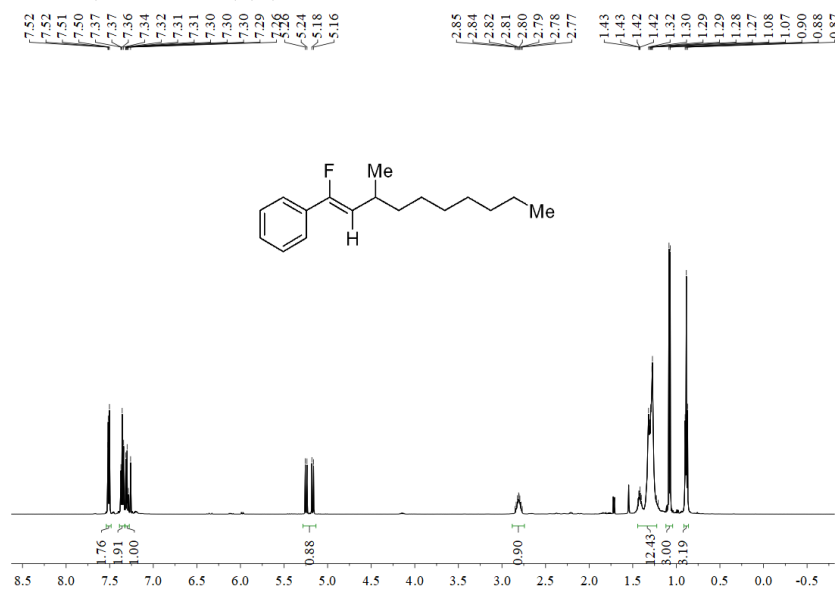

<sup>13</sup>C NMR (126 MHz, CDCl<sub>3</sub>) (37)

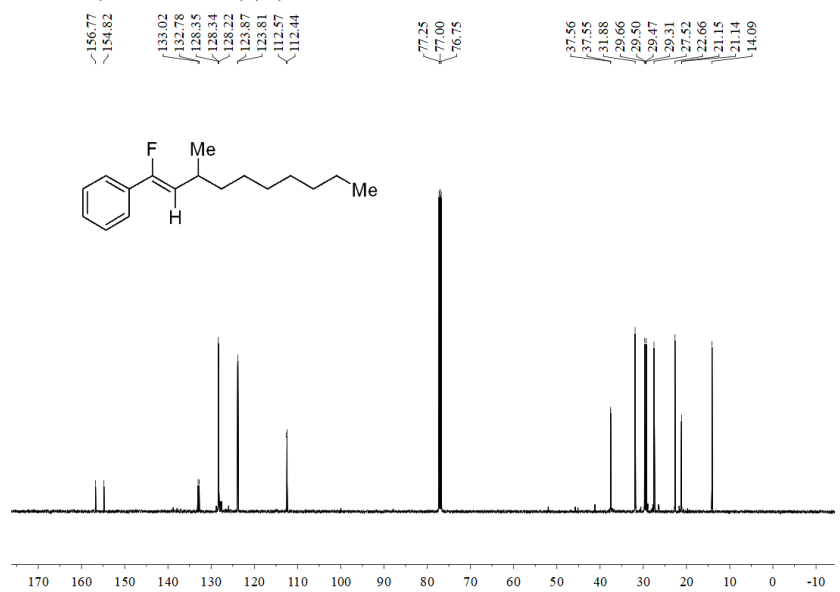

$^{19}\text{F}$  NMR (471 MHz,  $\text{CDCl}_3$ ) (37)

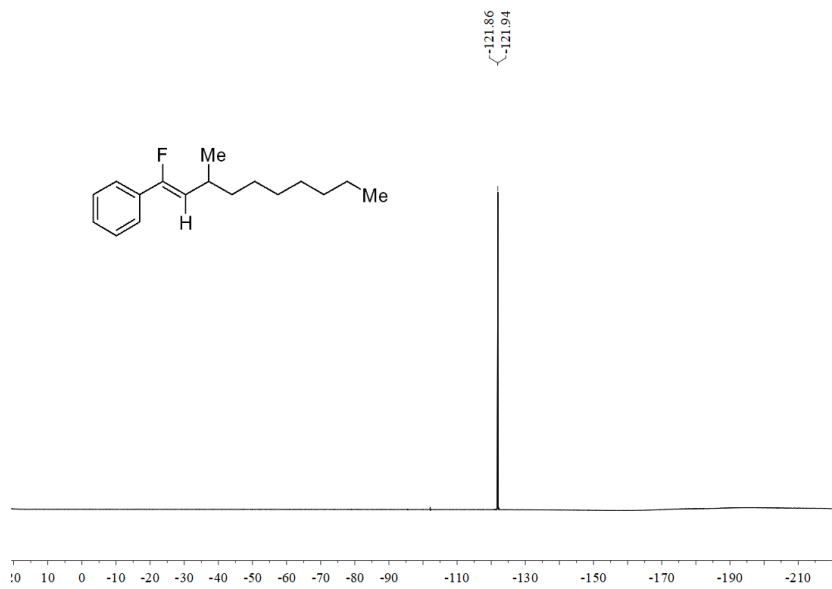

$^1\text{H}$  NMR (500 MHz,  $\text{CDCl}_3$ ) (38)

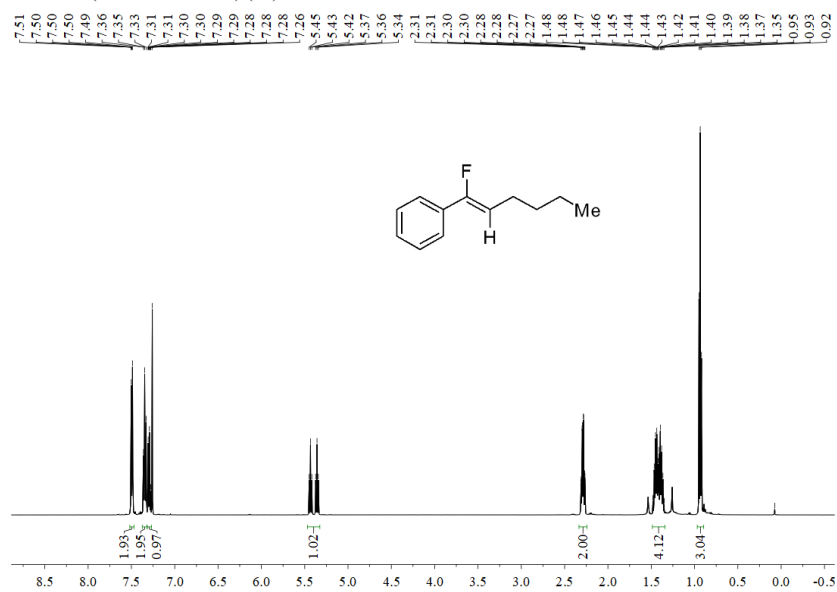

<sup>13</sup>C NMR (126 MHz, CDCl<sub>3</sub>) (38)

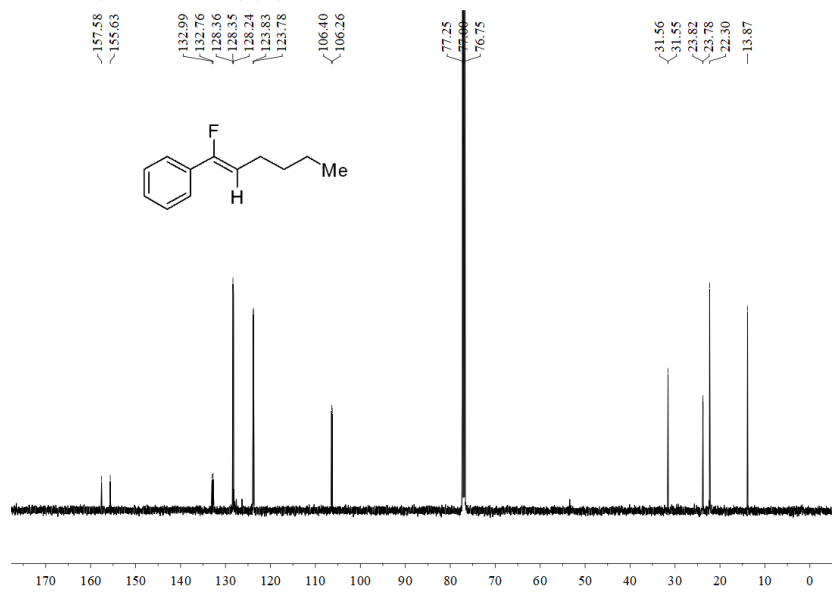

<sup>19</sup>F NMR (471 MHz, CDCl<sub>3</sub>) (38)

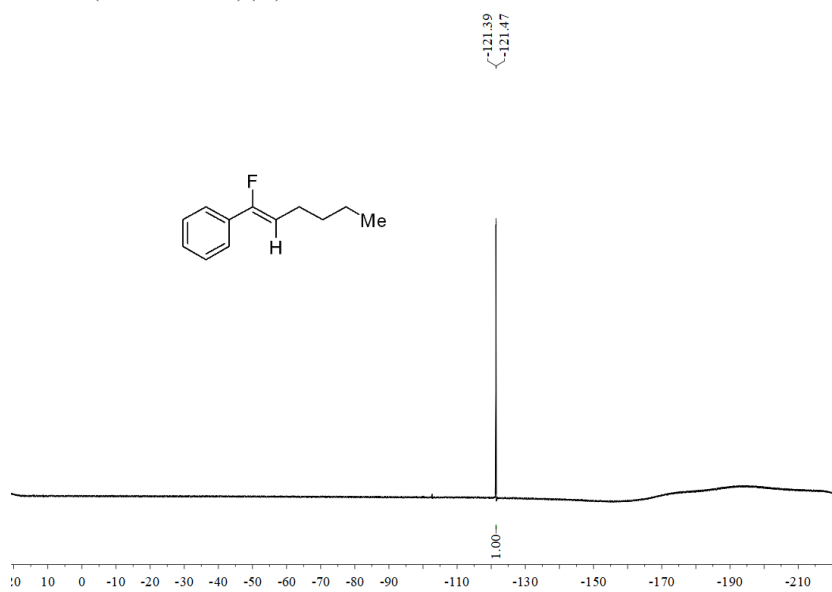

**<sup>1</sup>H NMR (300 MHz, CDCl<sub>3</sub>) (39)**

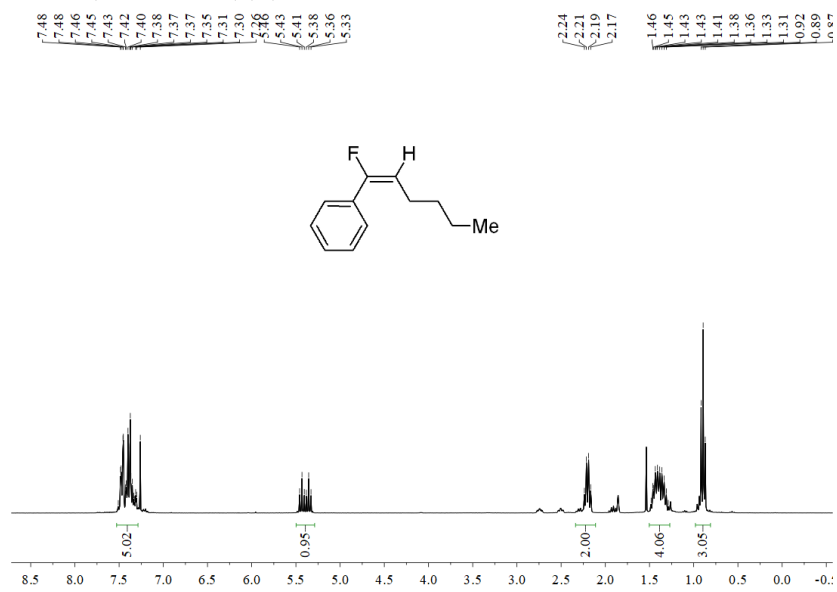

**<sup>13</sup>C NMR (126 MHz, CDCl<sub>3</sub>) (39)**

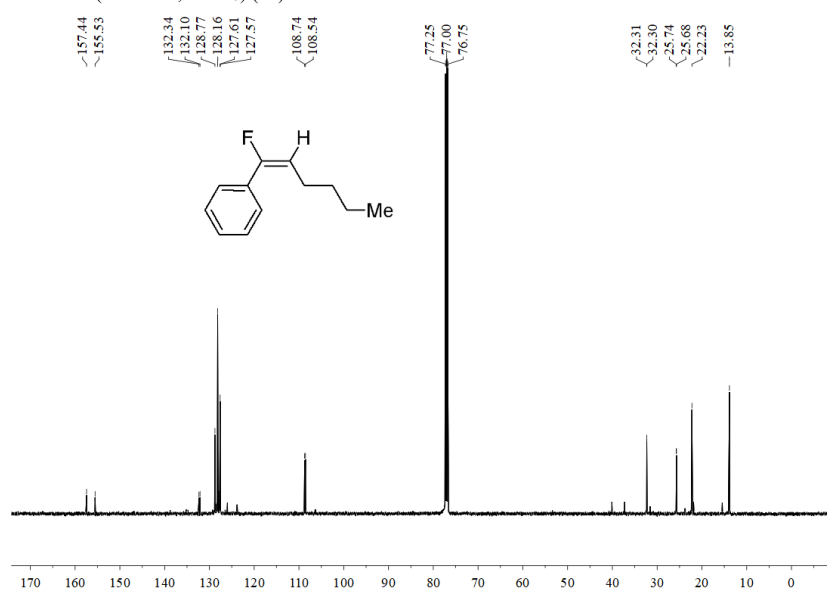

$^{19}\text{F}$  NMR (282 MHz,  $\text{CDCl}_3$ ) (39)

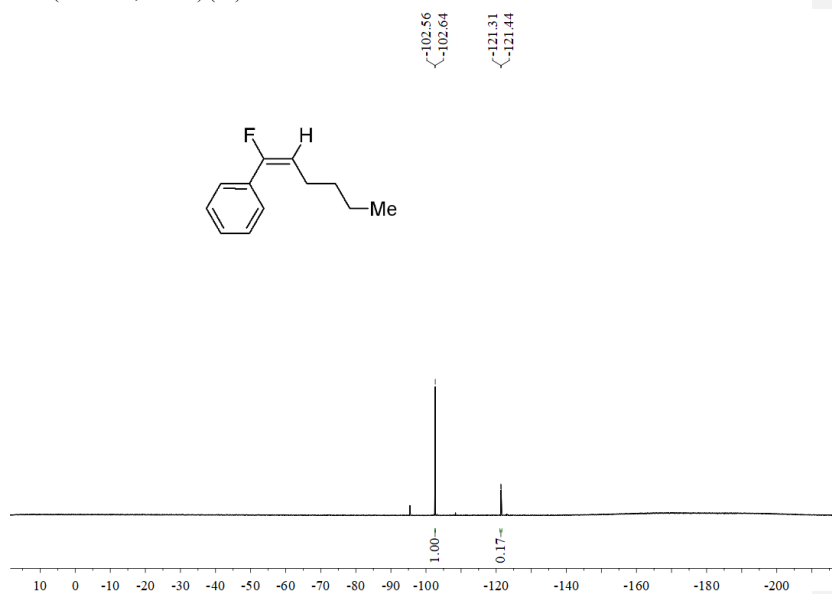

$^1\text{H}$  NMR (500 MHz,  $\text{CDCl}_3$ ) (40)

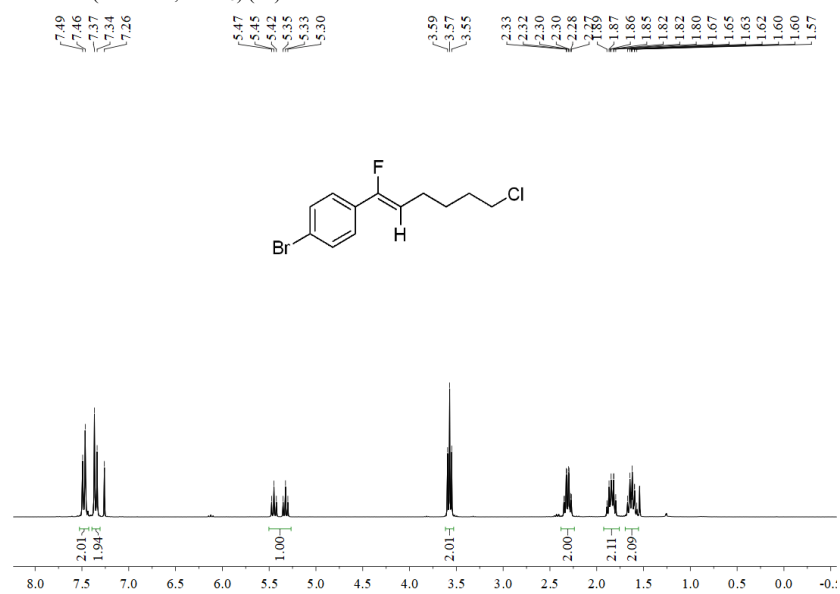

<sup>13</sup>C NMR (126 MHz, CDCl<sub>3</sub>) (40)

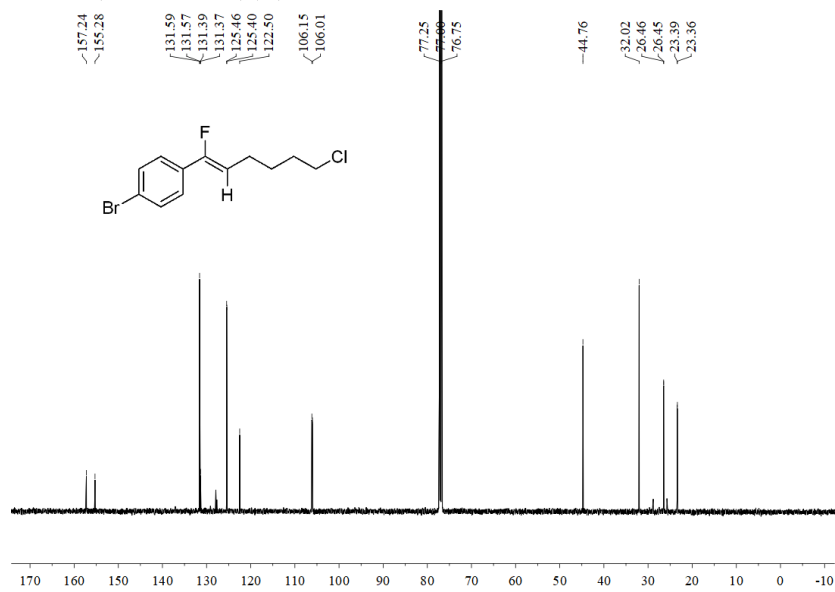

<sup>19</sup>F NMR (471 MHz, CDCl<sub>3</sub>) (40)

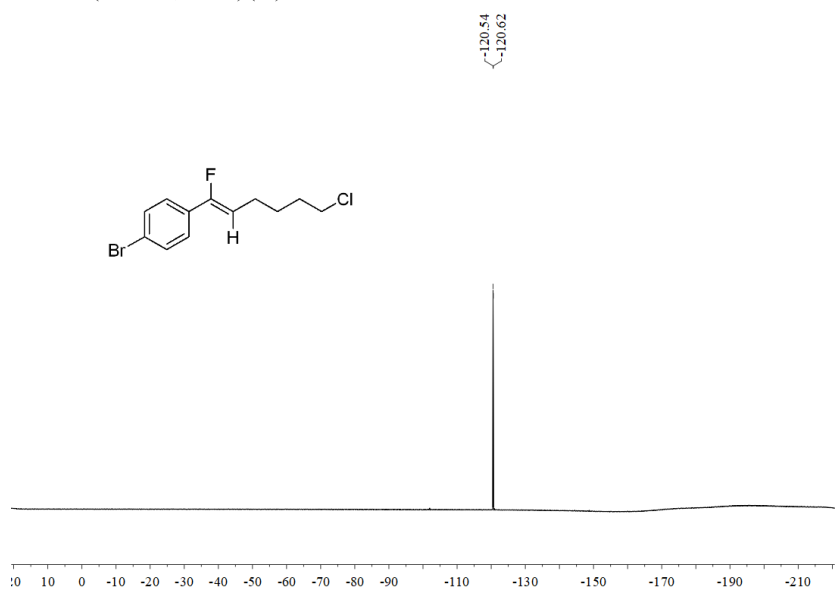

**<sup>1</sup>H NMR (300 MHz, CDCl<sub>3</sub>) (41)**

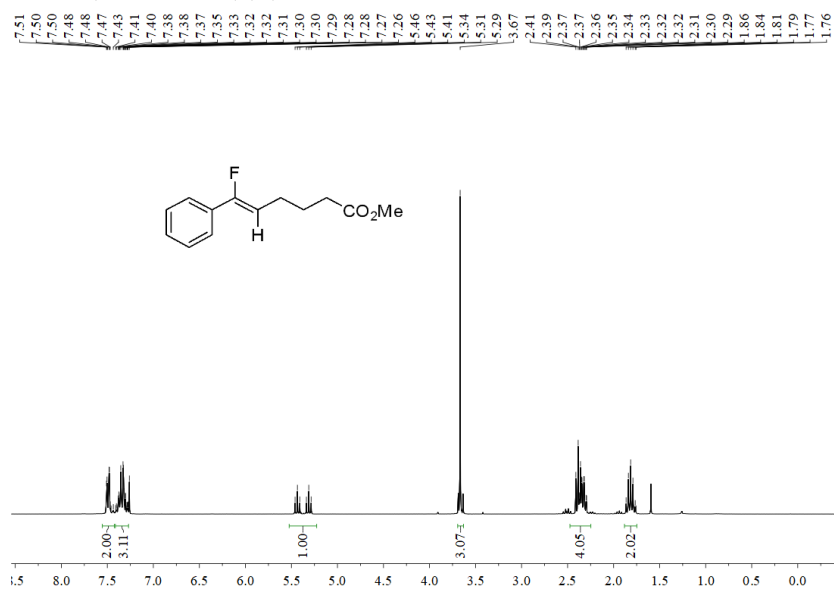

**<sup>13</sup>C NMR (101 MHz, CDCl<sub>3</sub>) (41)**

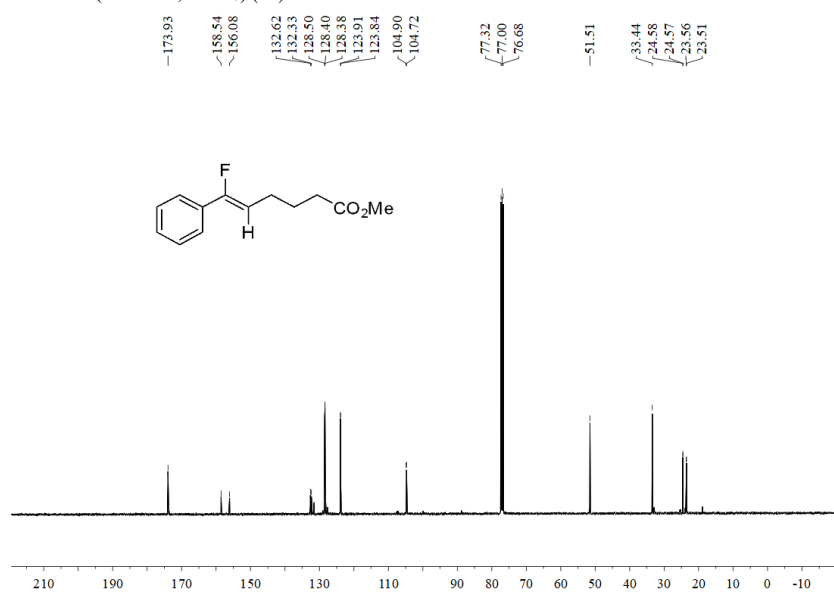



$^{19}\text{F}$  NMR (282 MHz,  $\text{CDCl}_3$ ) (41)

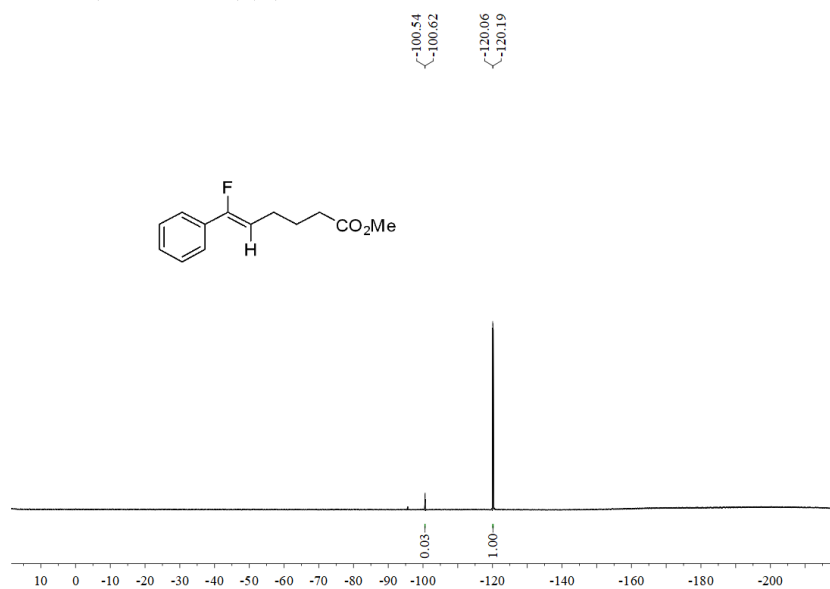

$^1\text{H}$  NMR (400 MHz,  $\text{CDCl}_3$ ) (42)

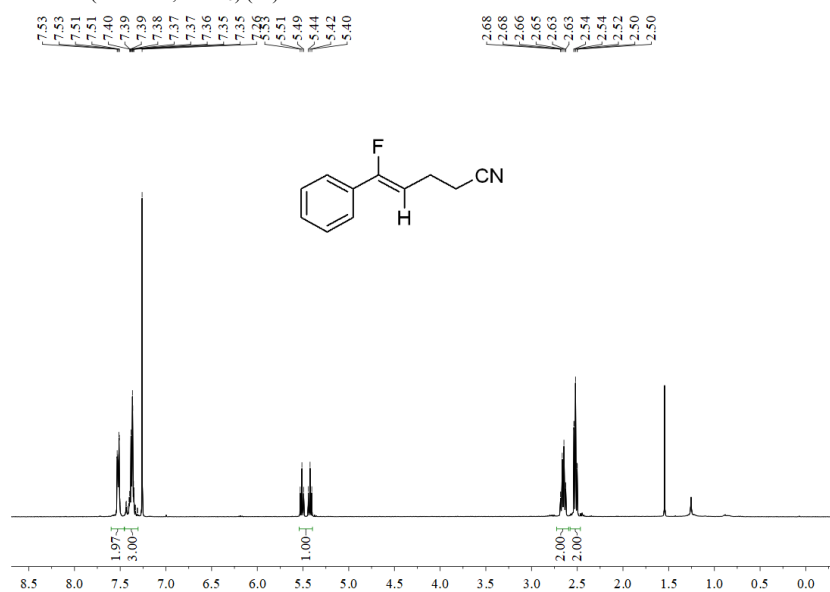

<sup>13</sup>C NMR (126 MHz, CDCl<sub>3</sub>) (42)

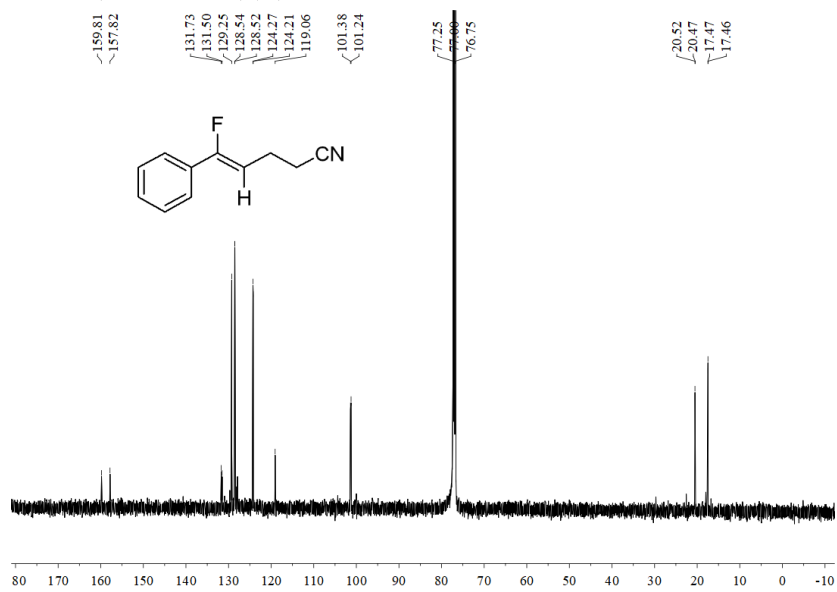

<sup>19</sup>F NMR (376 MHz, CDCl<sub>3</sub>) (42)

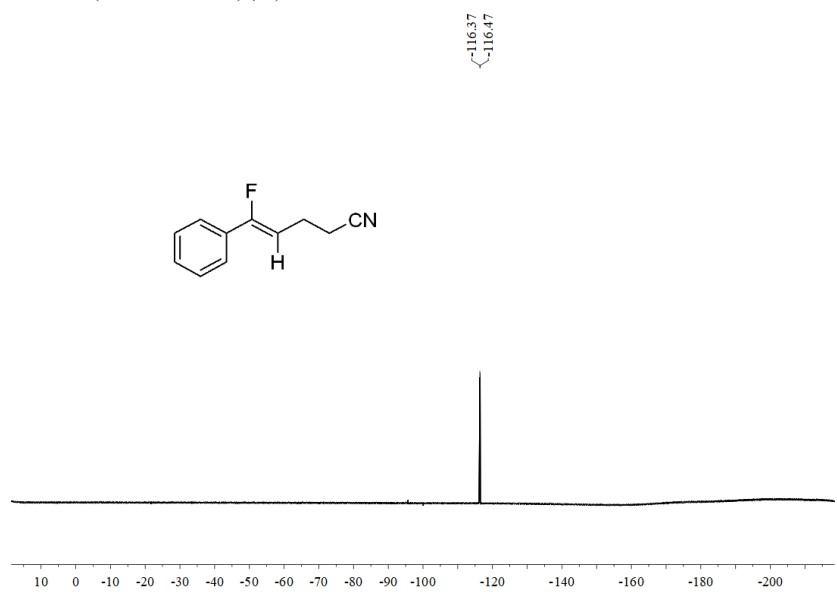

**<sup>1</sup>H NMR (500 MHz, CDCl<sub>3</sub>) (43)**

9.25, 9.25, 8.78, 8.78, 8.77, 8.77, 8.31, 8.30, 8.30, 8.29, 8.29, 8.28, 7.50, 7.49, 7.48, 7.48, 7.38, 7.38, 7.37, 7.37, 7.36, 7.36, 7.35, 7.35, 7.33, 7.33, 7.32, 7.32, 7.31, 7.31, 7.26, 7.26, 5.49, 5.49, 5.47, 5.46, 5.41, 5.41, 5.40, 5.40, 5.38, 5.38, 4.44, 4.44, 4.43, 4.43, 4.41, 4.41, 2.49, 2.49, 2.48, 2.48, 2.48, 2.46, 2.46, 2.46, 2.45, 2.45, 2.45, 2.00, 1.99, 1.97, 1.96, 1.95

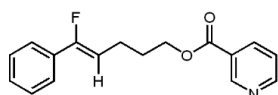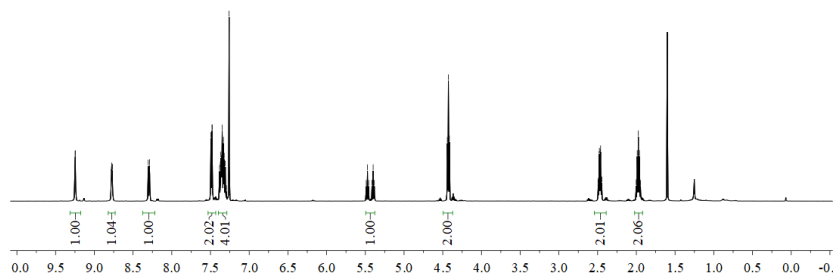

**<sup>13</sup>C NMR (126 MHz, CDCl<sub>3</sub>) (43)**

165.29, 158.50, 156.54, 153.39, 150.94, 137.01, 132.50, 132.27, 128.62, 128.44, 128.42, 126.22, 123.95, 123.89, 123.25, 104.47, 104.33, 77.25, 77.06, 76.75, 64.80, 28.38, 20.81, 20.76

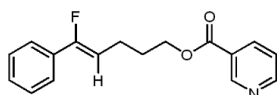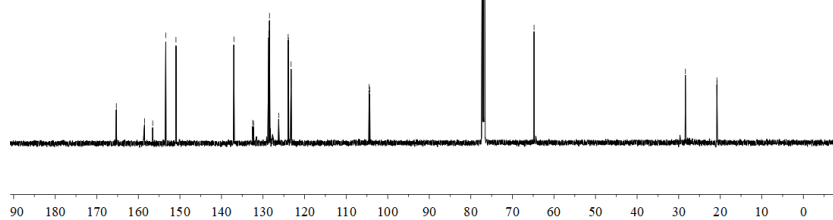

<sup>19</sup>F NMR (471 MHz, CDCl<sub>3</sub>) (43)

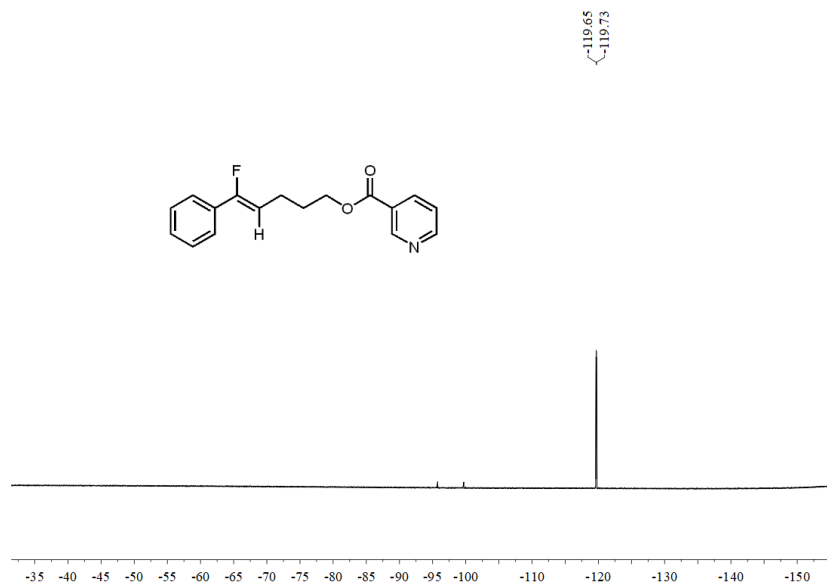

<sup>1</sup>H NMR (500 MHz, CDCl<sub>3</sub>) (44)

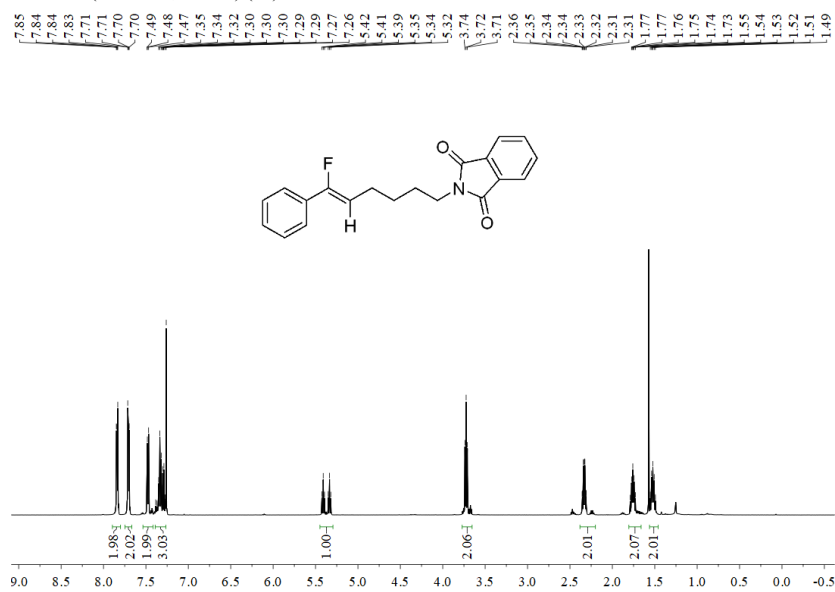

<sup>13</sup>C NMR (126 MHz, CDCl<sub>3</sub>) (44)

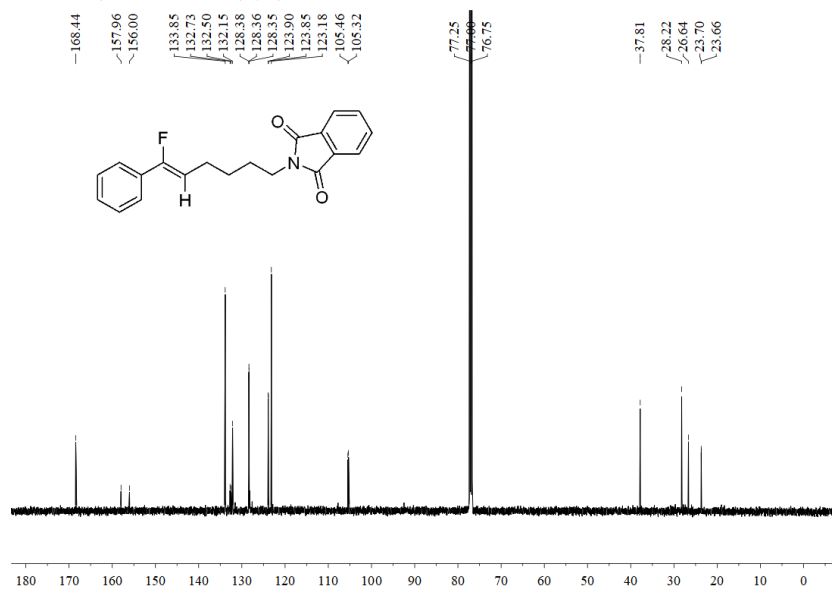

<sup>19</sup>F NMR (471 MHz, CDCl<sub>3</sub>) (44)

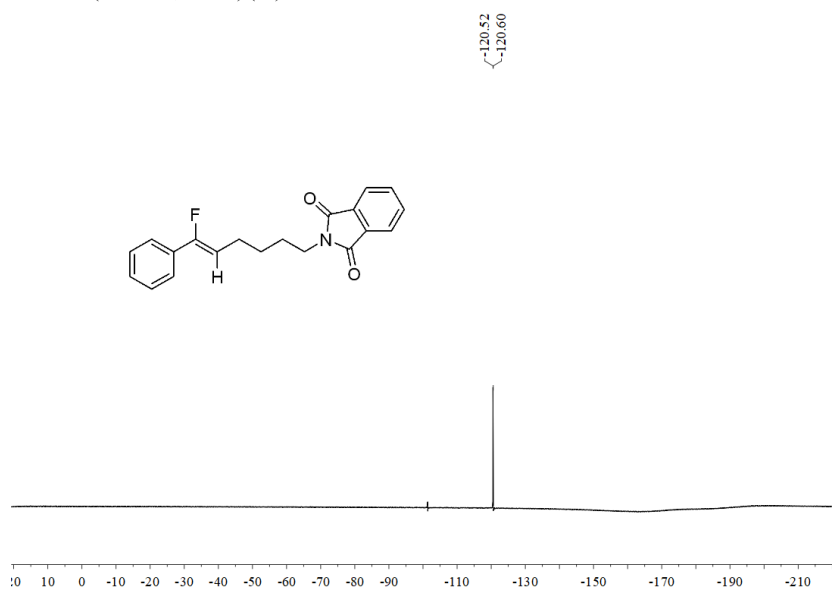

**<sup>1</sup>H NMR (500 MHz, CDCl<sub>3</sub>) (45)**

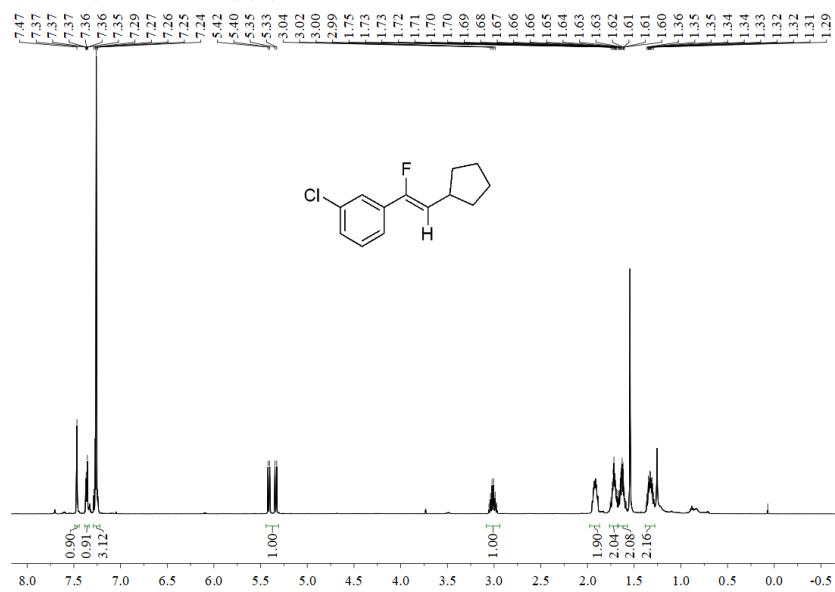

**<sup>13</sup>C NMR (126 MHz, CDCl<sub>3</sub>) (45)**

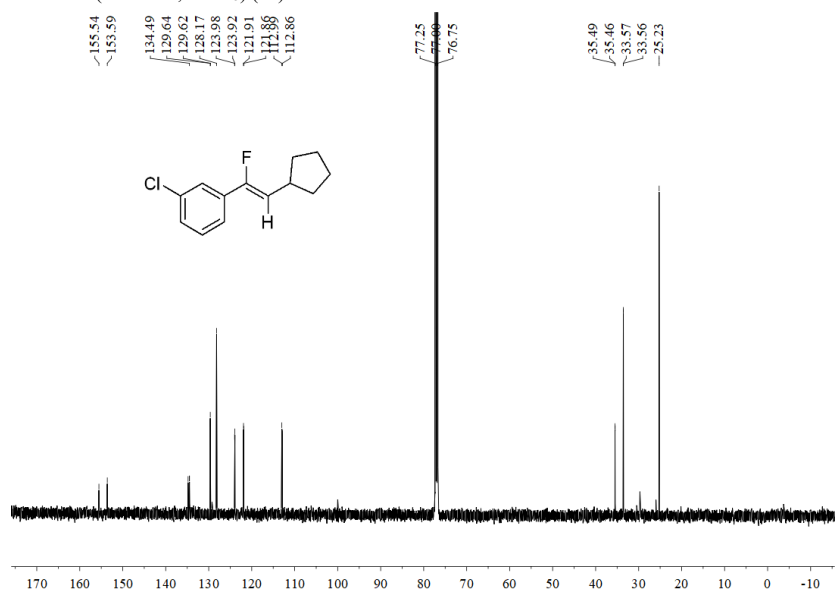

<sup>19</sup>F NMR (471 MHz, CDCl<sub>3</sub>) (45)

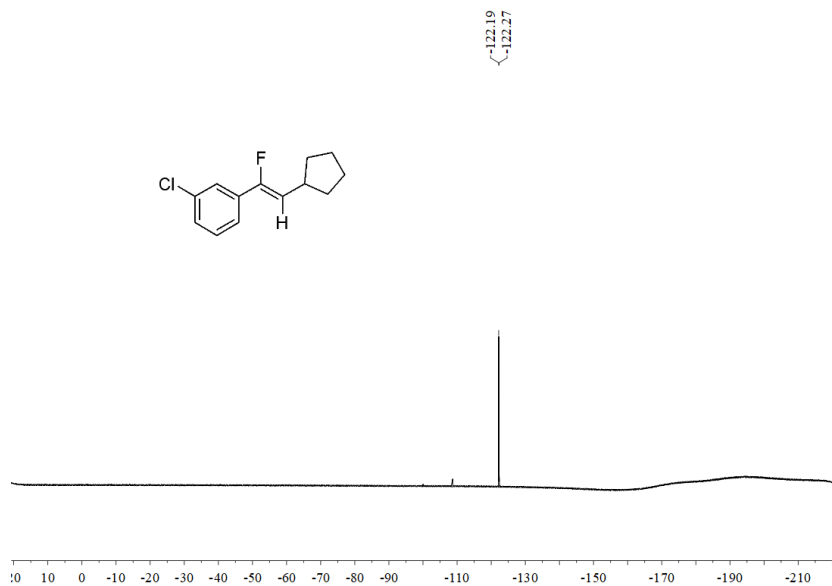

<sup>1</sup>H NMR (500 MHz, CDCl<sub>3</sub>) (46)

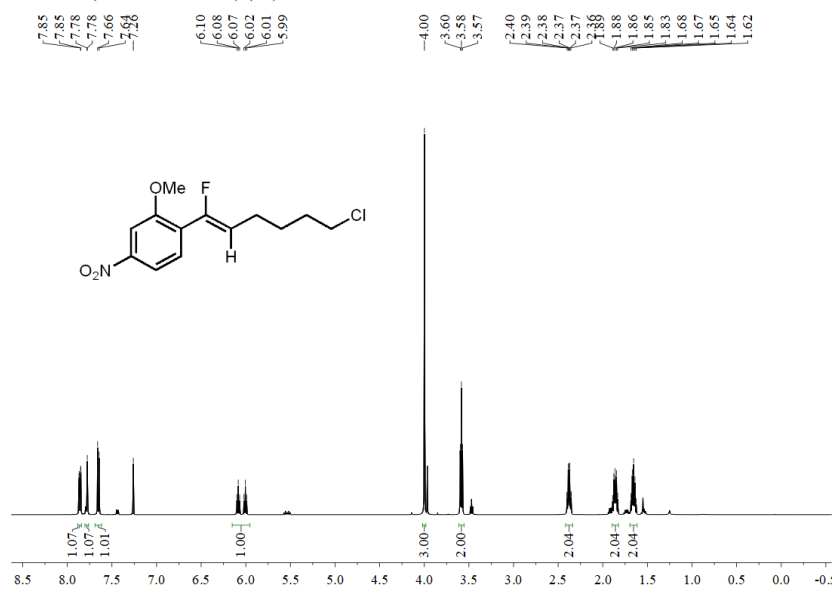

**<sup>13</sup>C NMR (126 MHz, CDCl<sub>3</sub>) (46)**

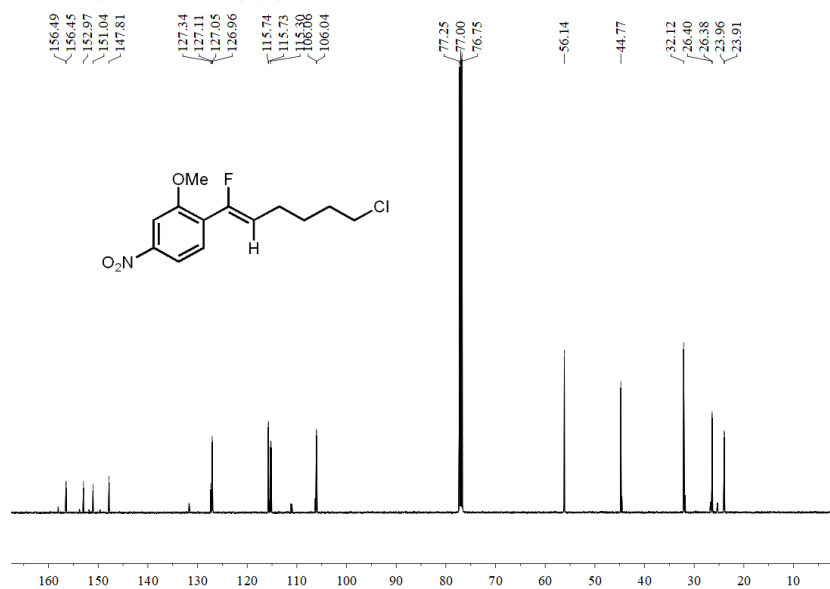

**<sup>19</sup>F NMR (471 MHz, CDCl<sub>3</sub>) (46)**

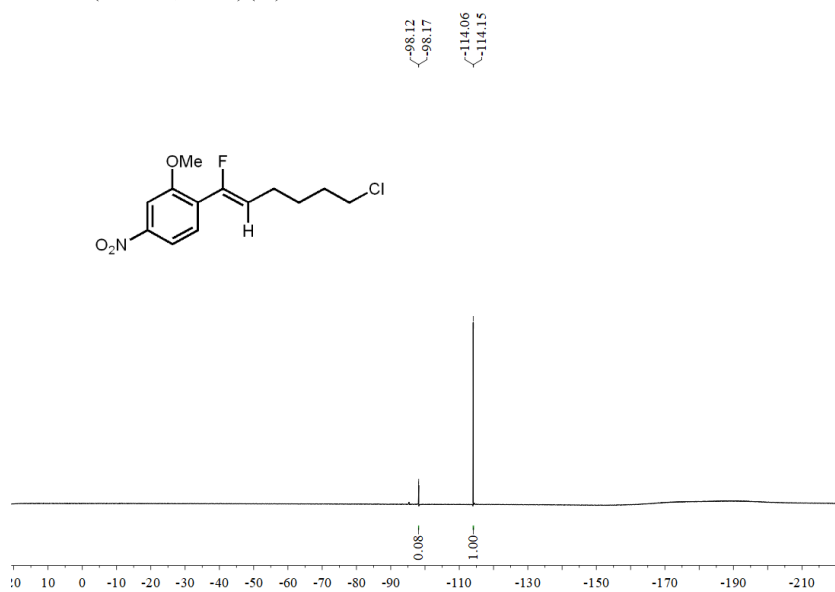



**<sup>1</sup>H NMR (500 MHz, CDCl<sub>3</sub>) (47)**

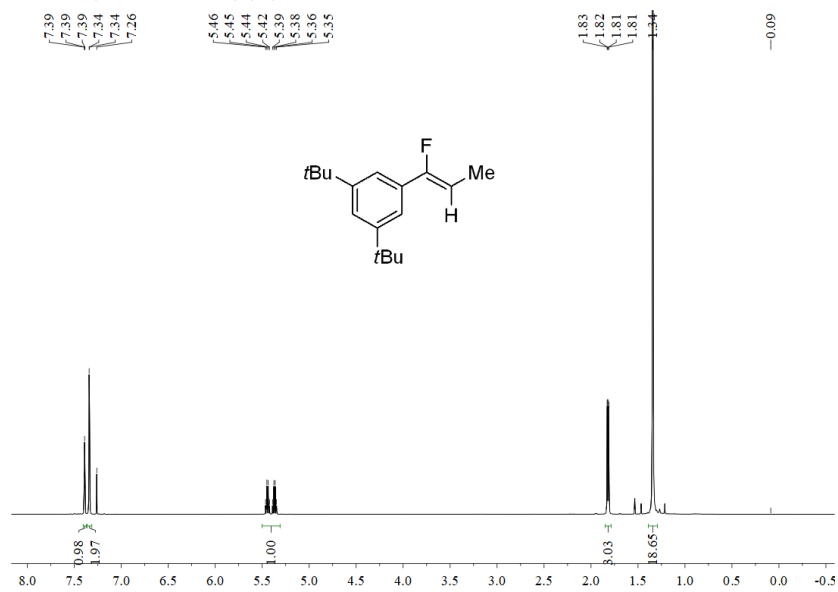

**<sup>13</sup>C NMR (126 MHz, CDCl<sub>3</sub>) (47)**

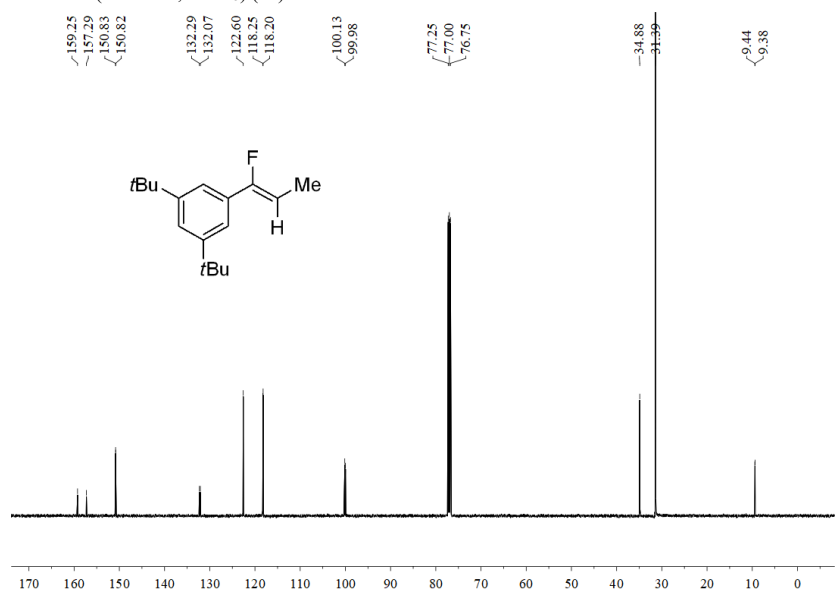

<sup>19</sup>F NMR (471 MHz, CDCl<sub>3</sub>) (47)

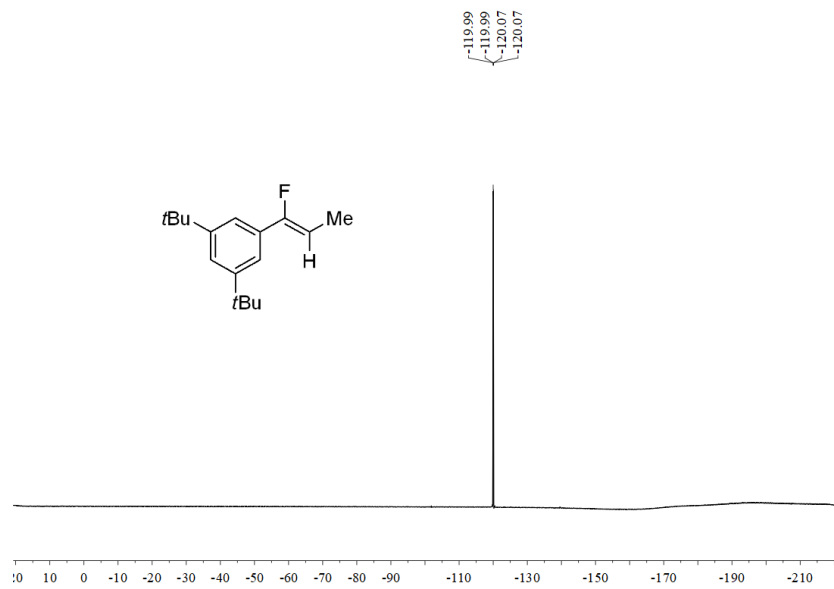

<sup>1</sup>H NMR (500 MHz, CDCl<sub>3</sub>) (48)

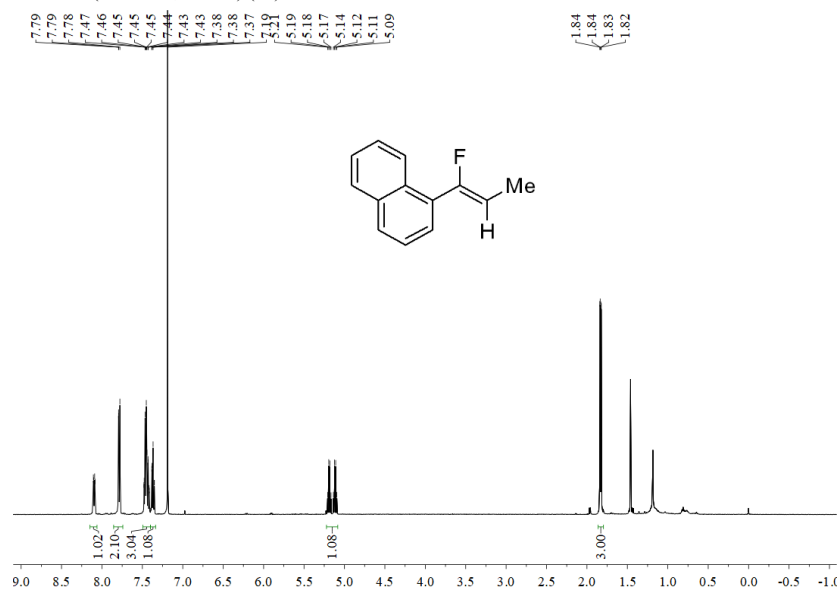

<sup>13</sup>C NMR (126 MHz, CDCl<sub>3</sub>) (48)

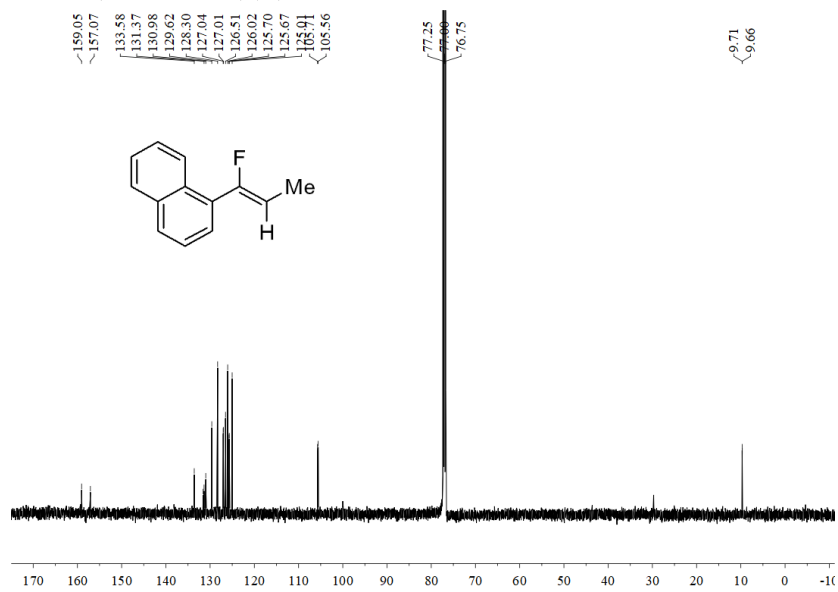

<sup>19</sup>F NMR (471 MHz, CDCl<sub>3</sub>) (48)

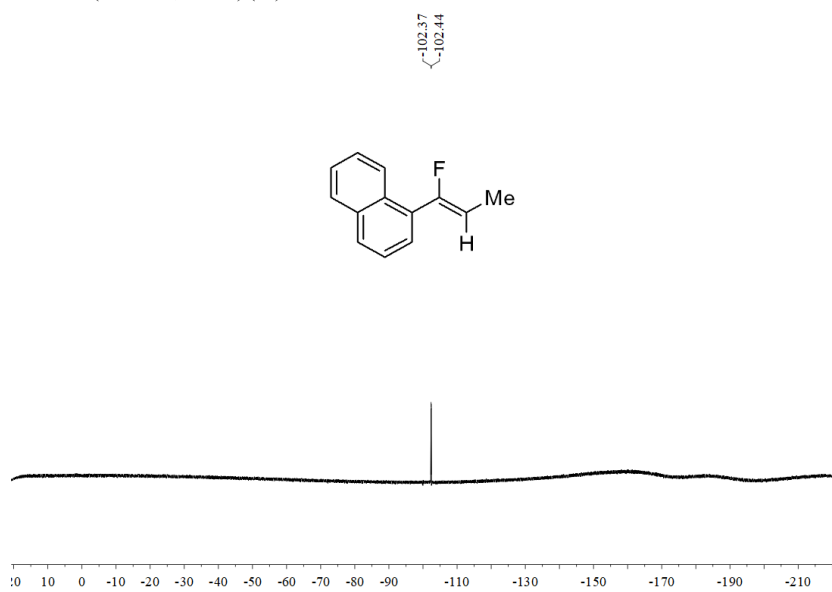

**<sup>1</sup>H NMR (500 MHz, CDCl<sub>3</sub>) (49)**

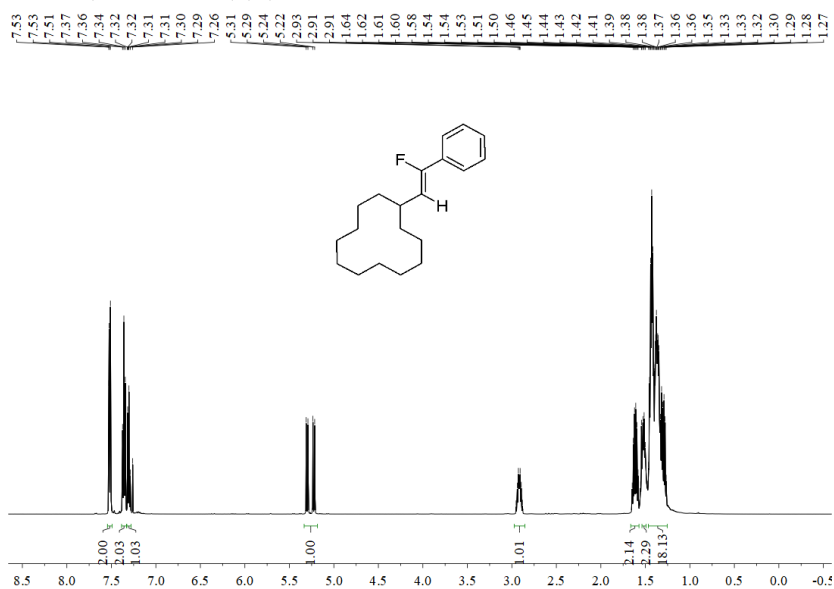

**<sup>13</sup>C NMR (126 MHz, CDCl<sub>3</sub>) (49)**

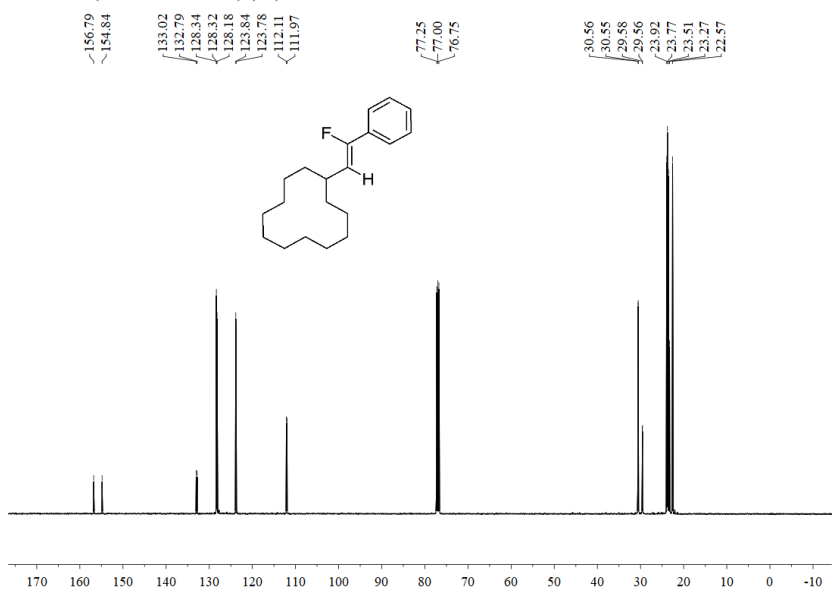

<sup>19</sup>F NMR (471 MHz, CDCl<sub>3</sub>) (49)

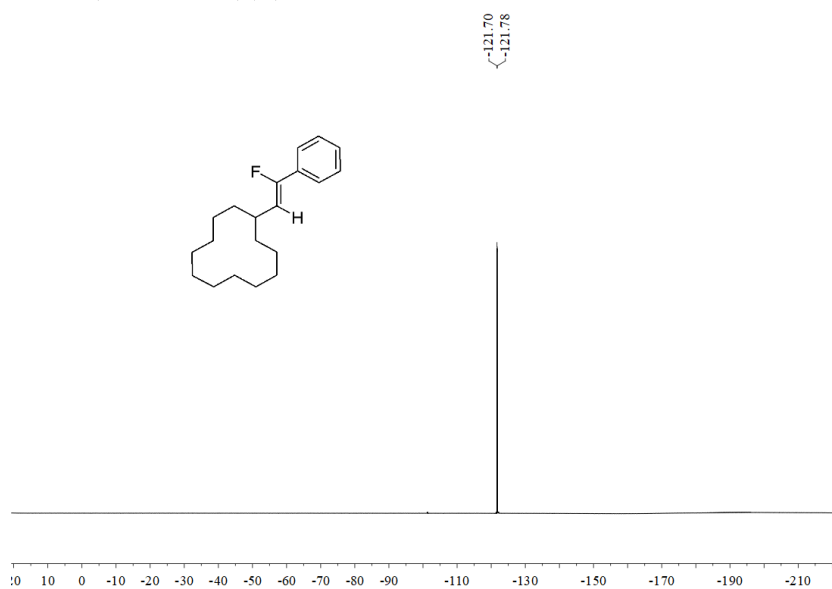

<sup>1</sup>H NMR (400 MHz, CDCl<sub>3</sub>) (50)

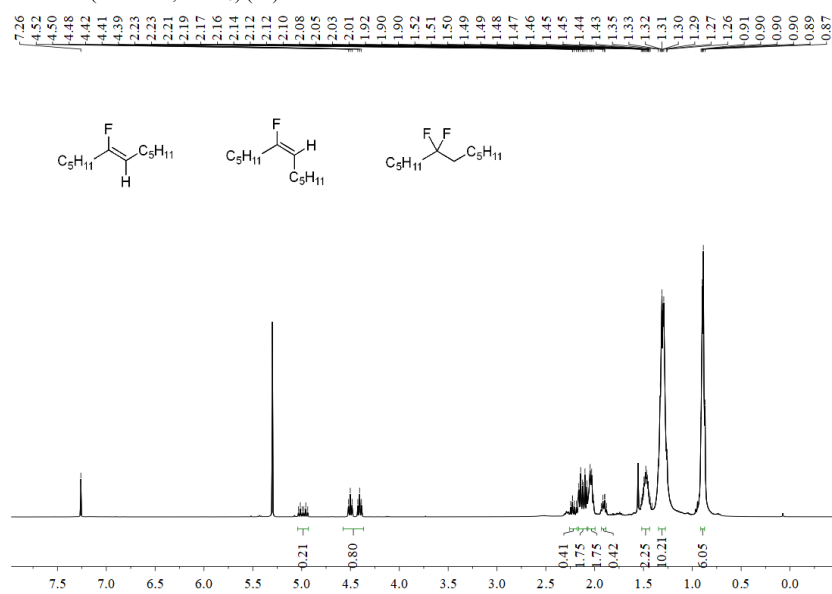

**<sup>19</sup>F NMR (376 MHz, CDCl<sub>3</sub>) (50)**

-97.55  
-97.59  
-97.64  
-97.65  
-97.68  
-97.69  
-97.73  
-97.74  
-105.21  
-105.22  
-105.27  
-105.28  
-105.33  
-105.35  
-105.39  
-105.41  
-110.12  
-110.17  
-110.22  
-110.27  
-110.31

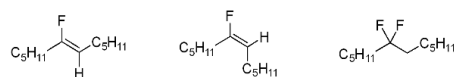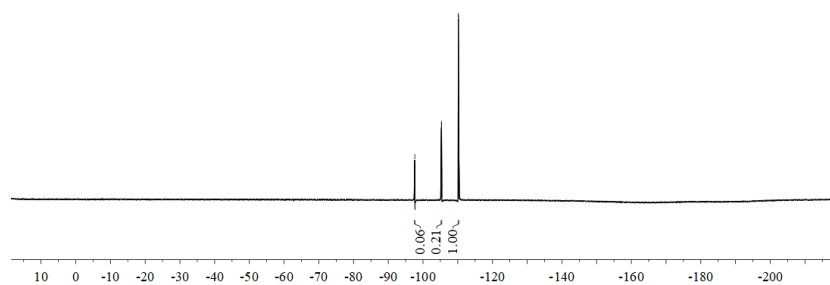

**<sup>1</sup>H NMR (400 MHz, CDCl<sub>3</sub>) (53)**

7.82  
7.81  
7.81  
7.80  
7.80  
7.79  
7.45  
7.44  
7.43  
7.42  
7.42  
7.41  
7.41  
7.76  
6.12

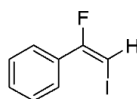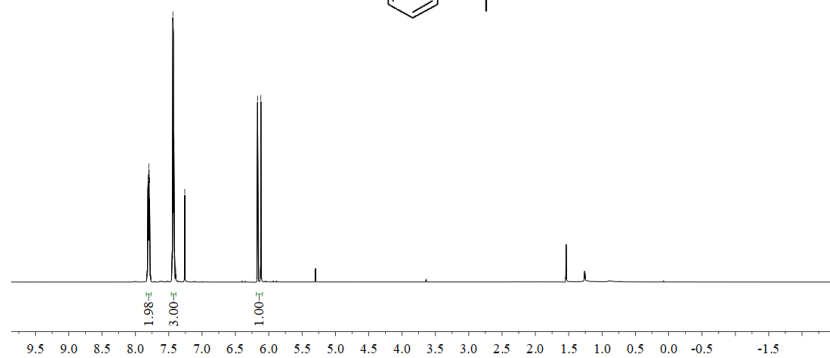

<sup>13</sup>C NMR (101 MHz, CDCl<sub>3</sub>) (53)

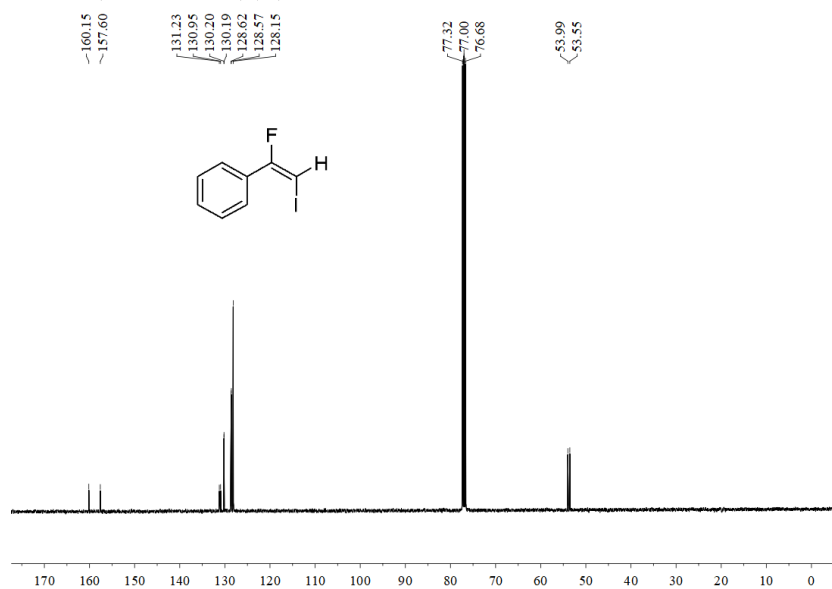

<sup>19</sup>F NMR (376 MHz, CDCl<sub>3</sub>) (53)

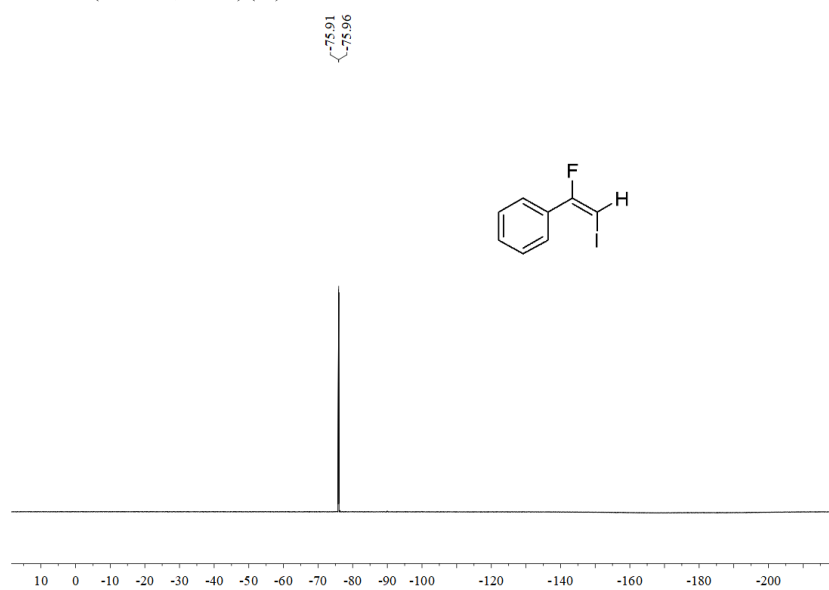

**<sup>1</sup>H NMR (500 MHz, CDCl<sub>3</sub>) (57)**

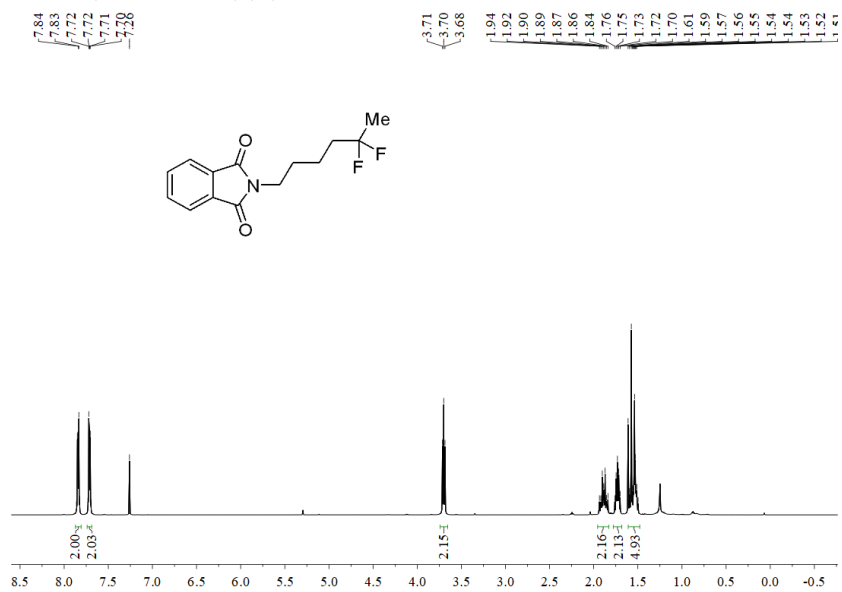

**<sup>13</sup>C NMR (126 MHz, CDCl<sub>3</sub>) (57)**

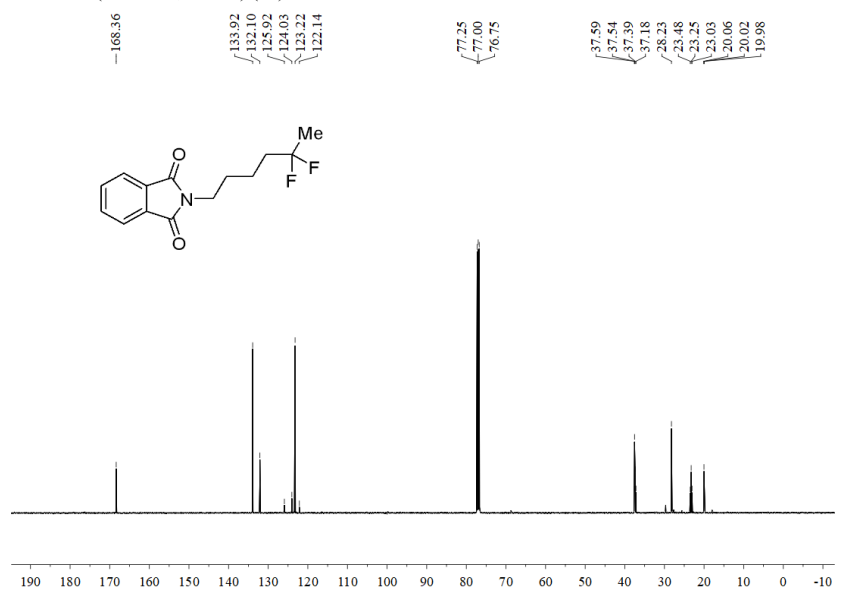



$^{19}\text{F}$  NMR (471 MHz,  $\text{CDCl}_3$ ) (57)

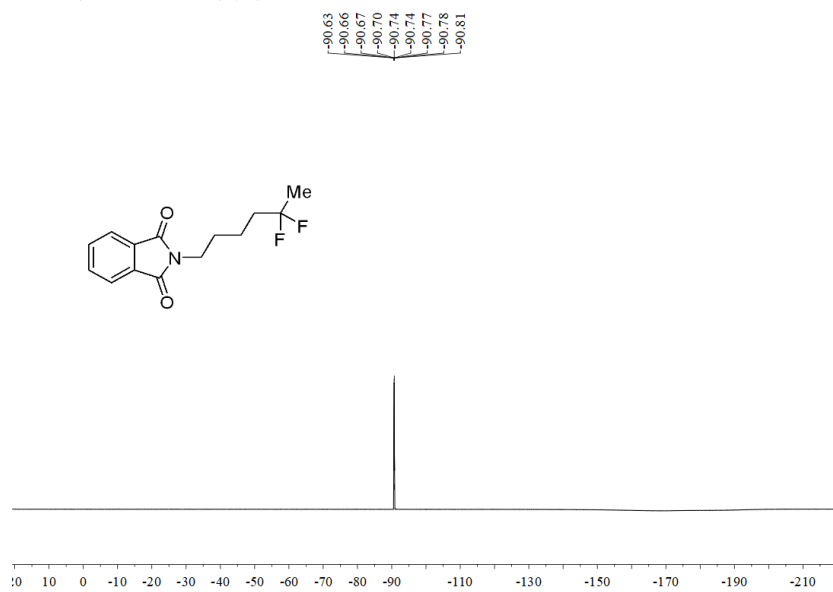

$^1\text{H}$  NMR (500 MHz,  $\text{CDCl}_3$ ) (58)

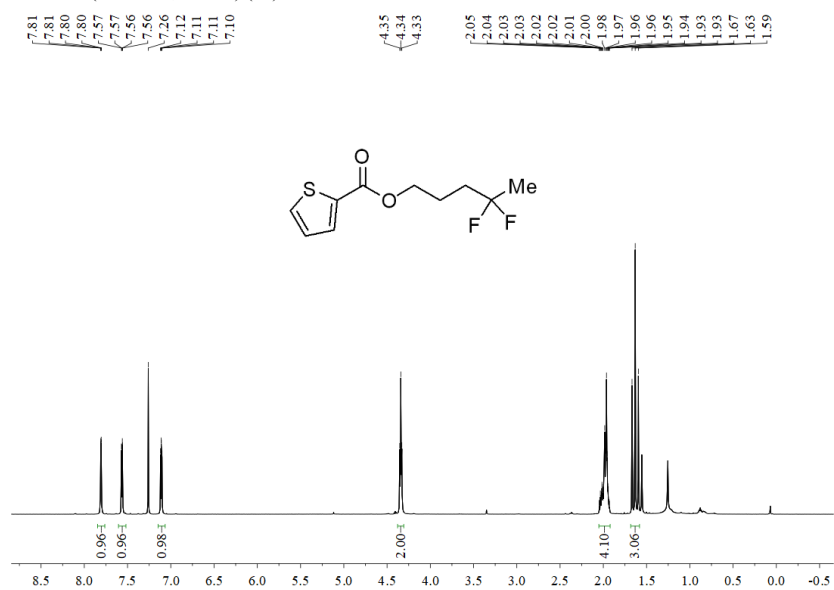

<sup>13</sup>C NMR (126 MHz, CDCl<sub>3</sub>) (58)

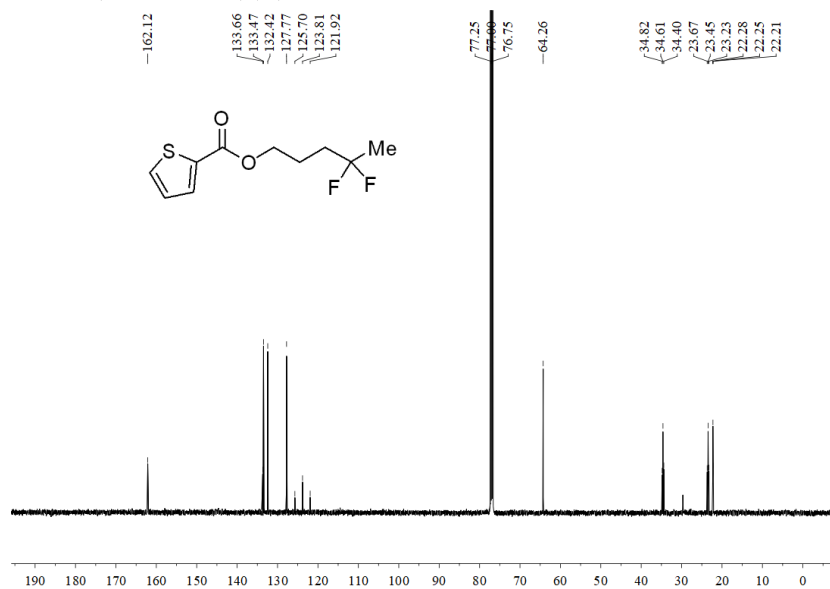

<sup>19</sup>F NMR (471 MHz, CDCl<sub>3</sub>) (58)

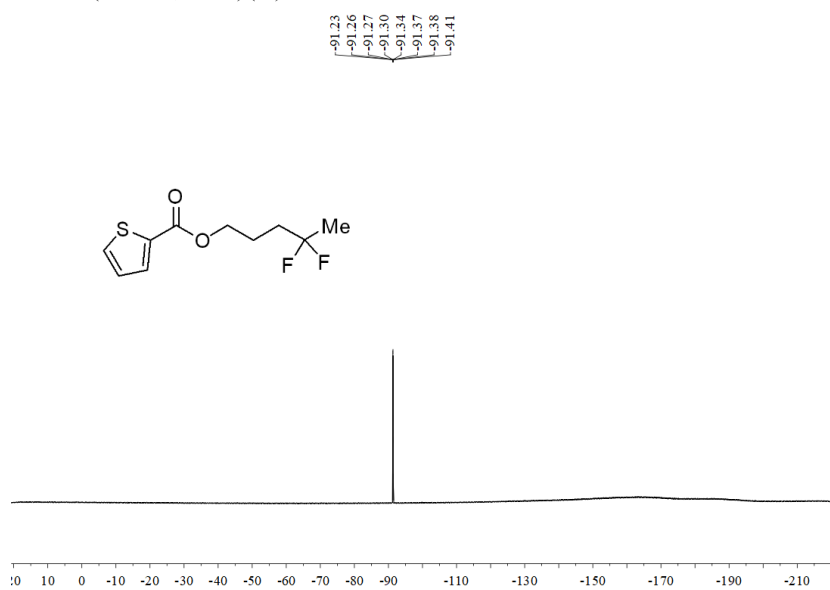

**<sup>1</sup>H NMR (500 MHz, CDCl<sub>3</sub>) (59)**

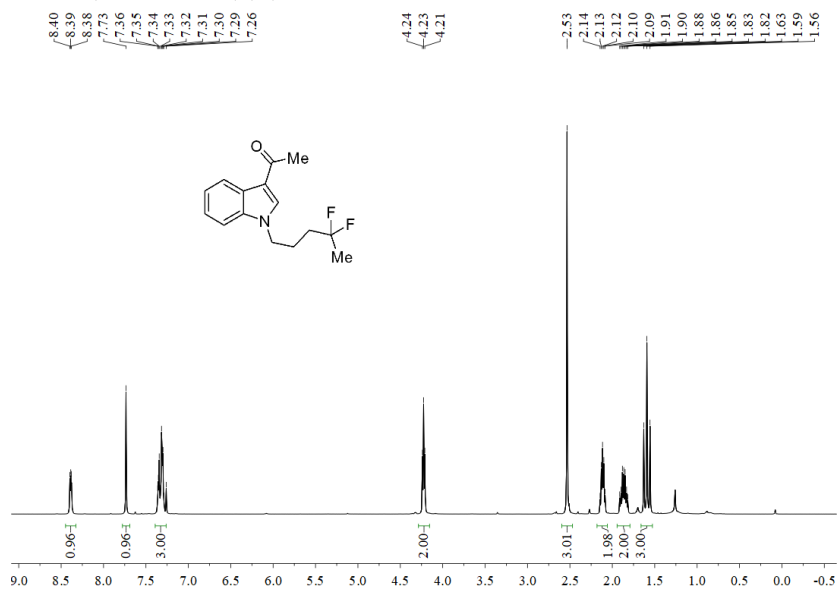

**<sup>13</sup>C NMR (126 MHz, CDCl<sub>3</sub>) (59)**

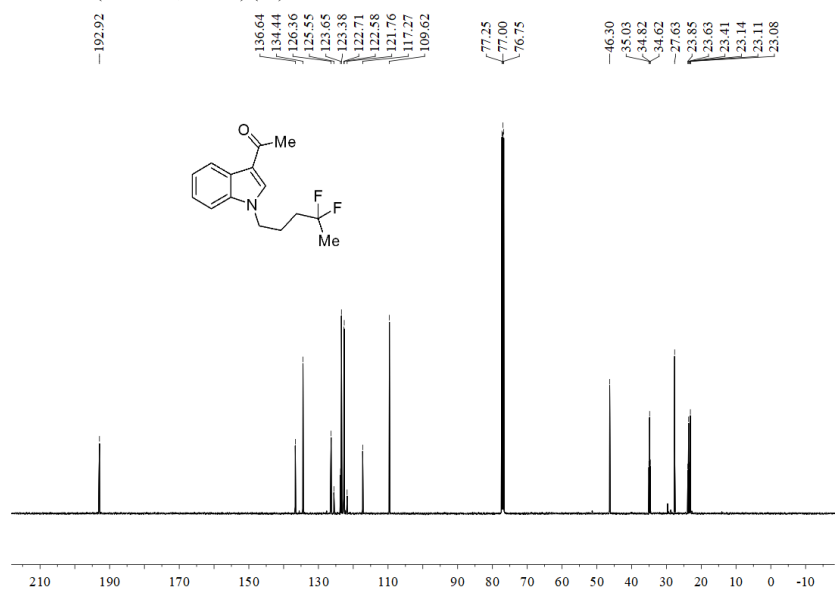

$^{19}\text{F}$  NMR (471 MHz,  $\text{CDCl}_3$ ) (59)

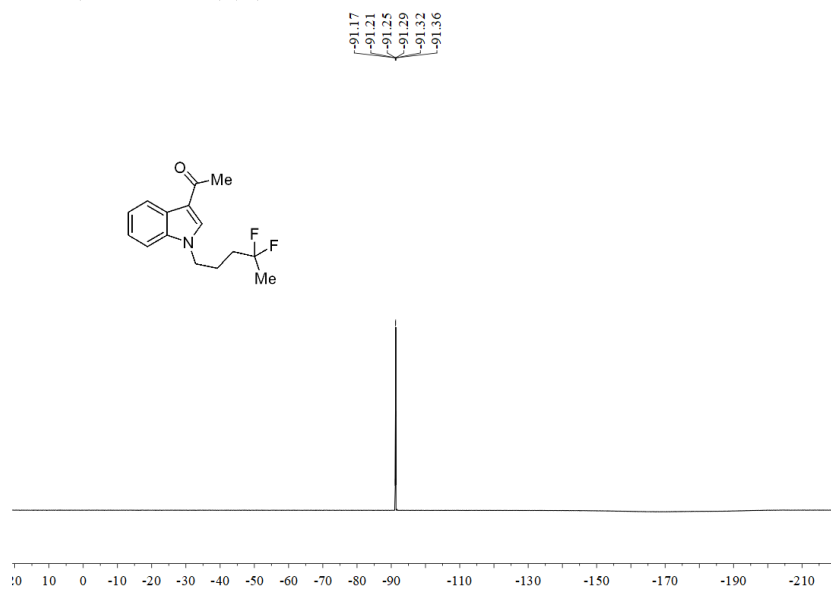

$^1\text{H}$  NMR (500 MHz,  $\text{CDCl}_3$ ) (60)

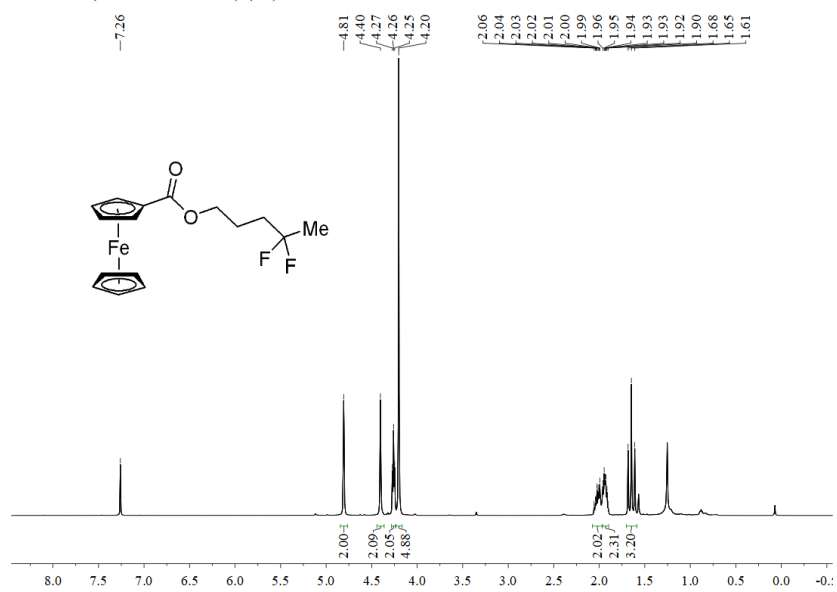

<sup>13</sup>C NMR (126 MHz, CDCl<sub>3</sub>) (60)

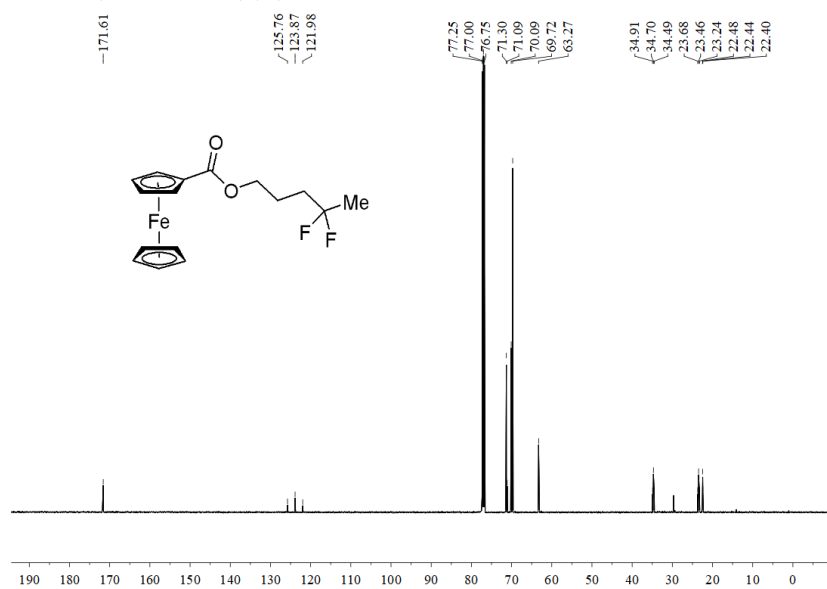

<sup>19</sup>F NMR (471 MHz, CDCl<sub>3</sub>) (60)

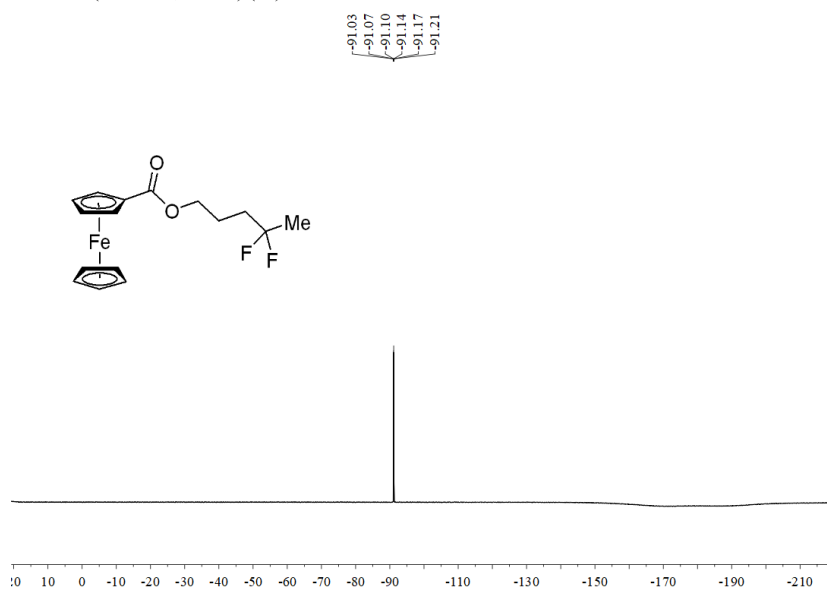

**<sup>1</sup>H NMR (500 MHz, CDCl<sub>3</sub>) (64)**

7.53, 7.51, 7.51, 7.43, 7.42, 7.32, 7.31, 7.30, 7.30, 7.30, 7.29, 7.29, 7.29, 5.18, 5.14, 5.14, 5.12, 5.11, 5.04, 5.03

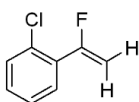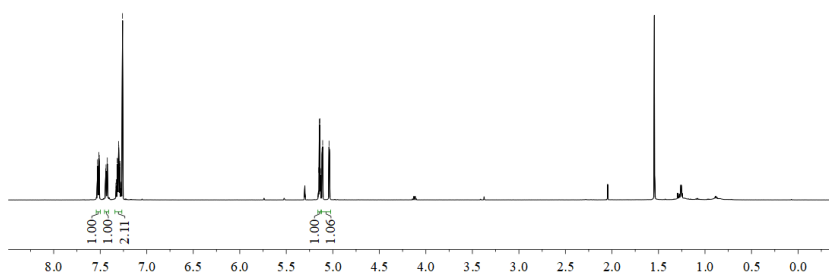

**<sup>13</sup>C NMR (126 MHz, CDCl<sub>3</sub>) (64)**

161.46, 159.46, 132.25, 132.23, 131.49, 131.27, 130.46, 130.40, 130.40, 129.80, 129.76, 126.67, 96.00, 95.83, 77.25, 77.06, 76.75

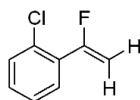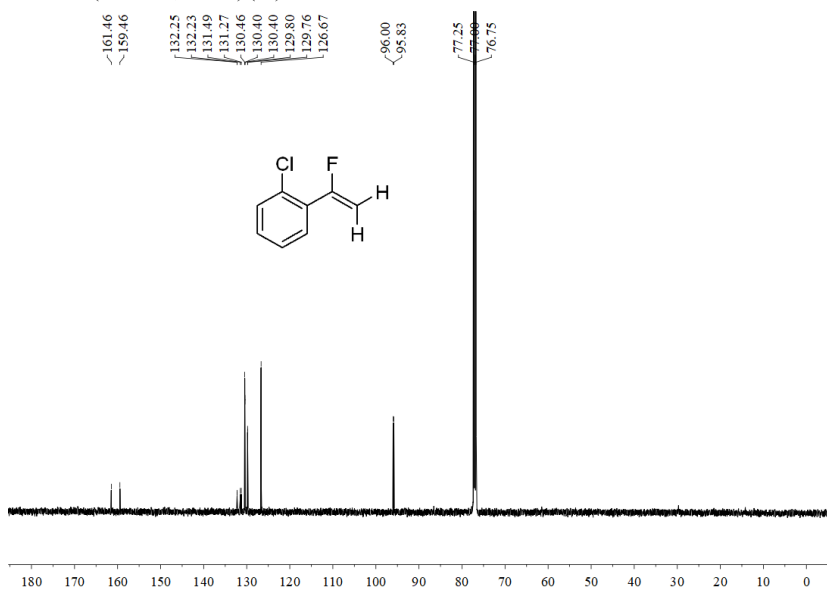

$^{19}\text{F}$  NMR (471 MHz,  $\text{CDCl}_3$ ) (64)

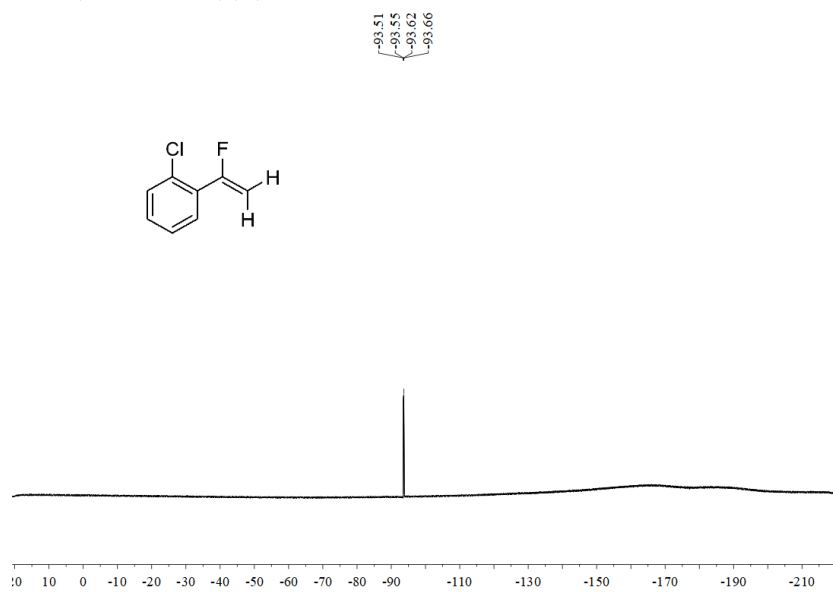

$^1\text{H}$  NMR (500 MHz,  $\text{CDCl}_3$ ) (65)

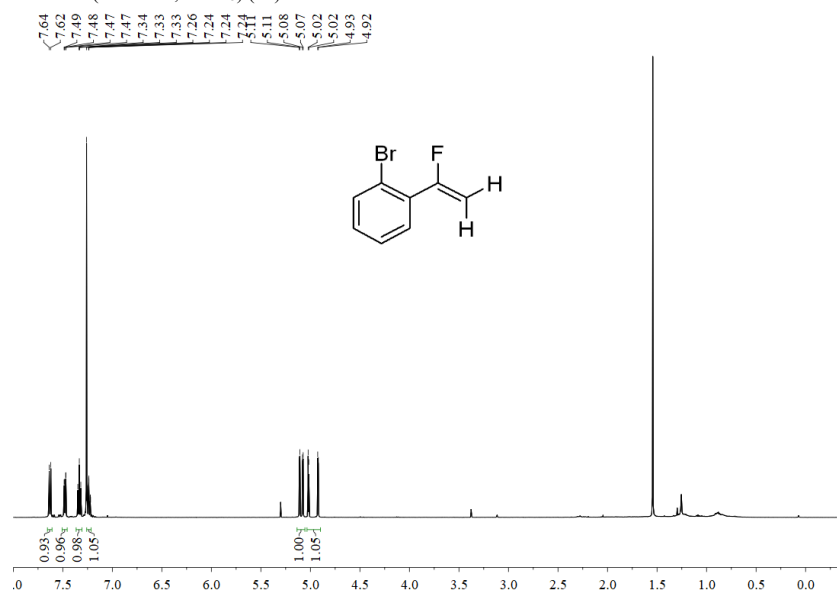

<sup>13</sup>C NMR (126 MHz, CDCl<sub>3</sub>) (65)

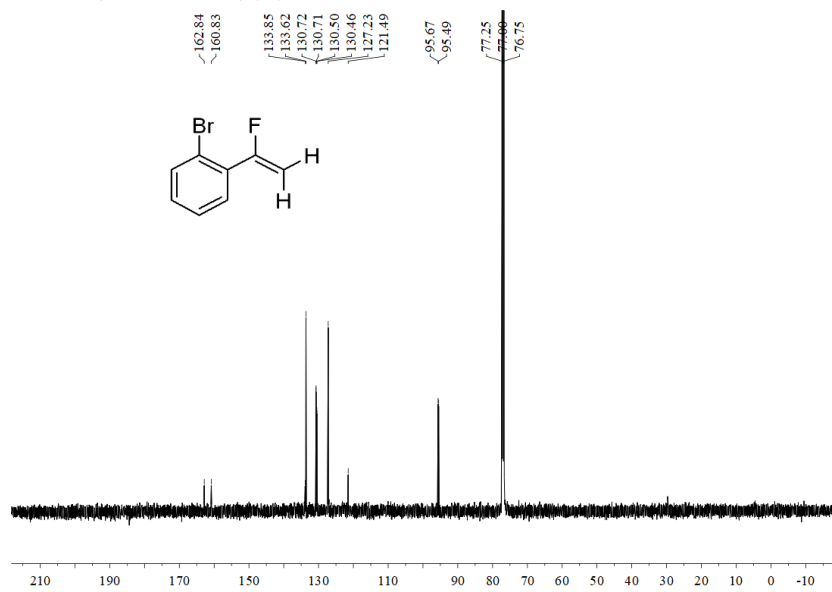

<sup>19</sup>F NMR (471 MHz, CDCl<sub>3</sub>) (65)

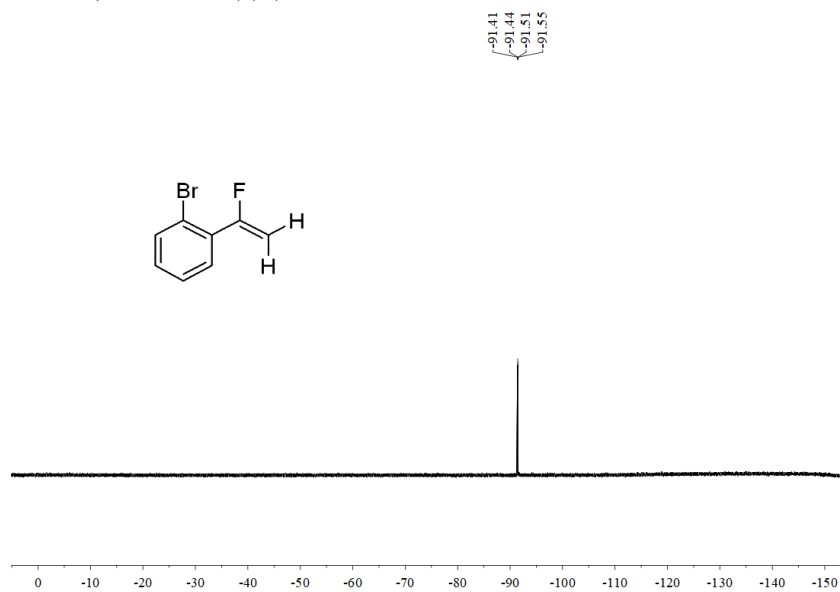



**<sup>1</sup>H NMR (500 MHz, CDCl<sub>3</sub>) (71)**

7.67  
7.67  
7.66  
7.65  
7.44  
7.43  
7.41  
7.39  
7.36  
7.29  
7.28  
7.26  
7.26

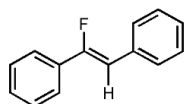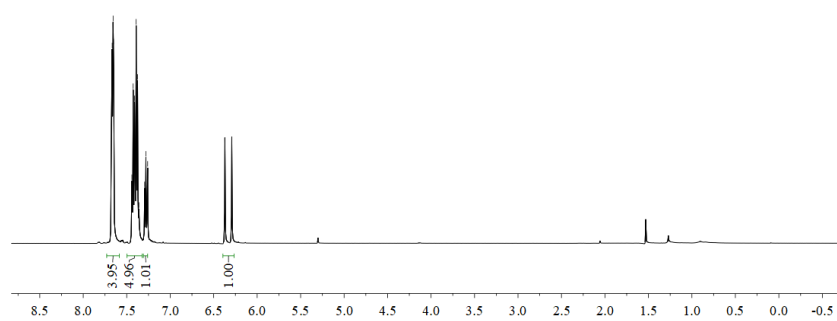

**<sup>13</sup>C NMR (126 MHz, CDCl<sub>3</sub>) (71)**

158.23  
156.17  
133.68  
133.66  
128.98  
128.97  
128.90  
128.89  
128.57  
127.32  
124.32  
105.81

77.25  
77.00  
76.75

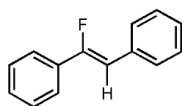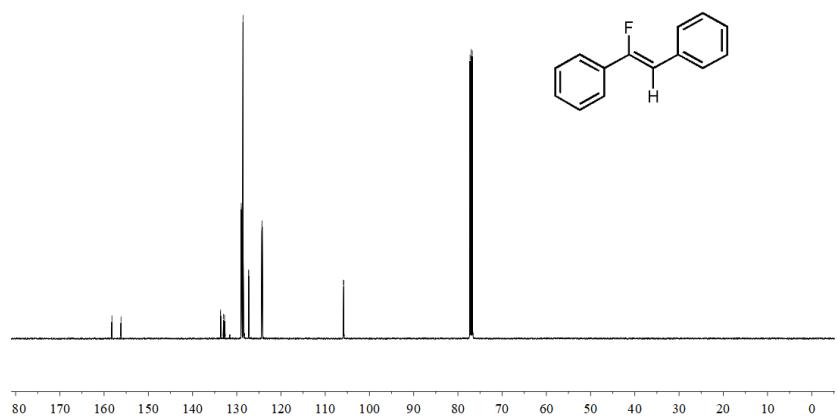

<sup>19</sup>F NMR (471 MHz, CDCl<sub>3</sub>) (71)

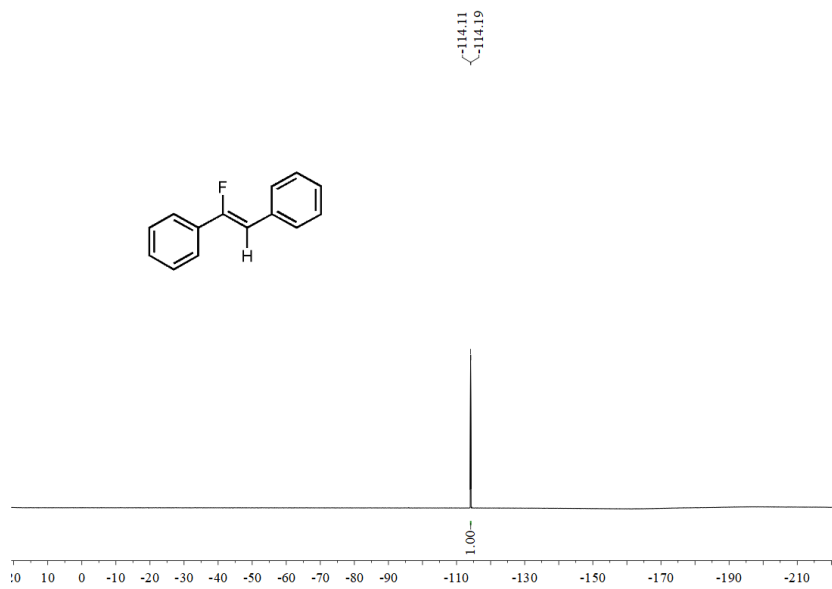

<sup>1</sup>H NMR (500 MHz, CDCl<sub>3</sub>) (72)

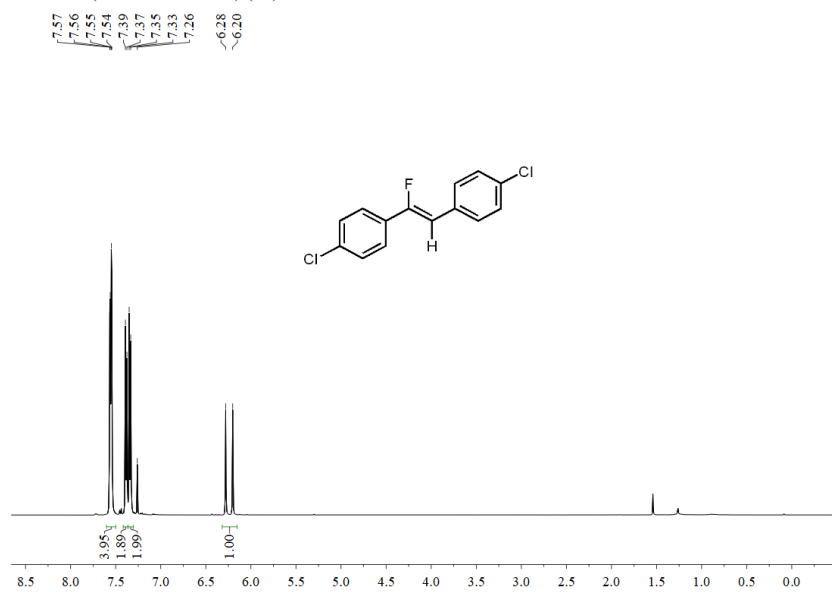

**<sup>13</sup>C NMR (126 MHz, CDCl<sub>3</sub>) (72)**

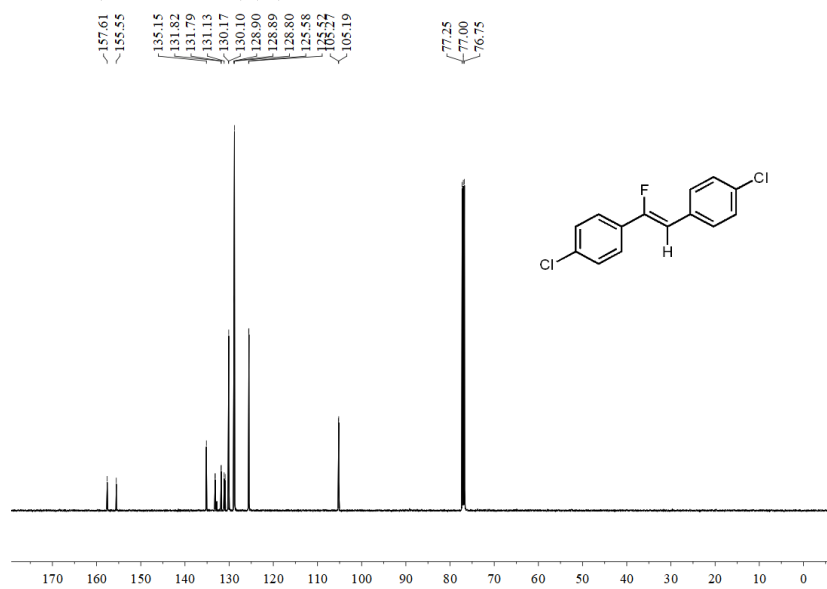

**<sup>19</sup>F NMR (471 MHz, CDCl<sub>3</sub>) (72)**

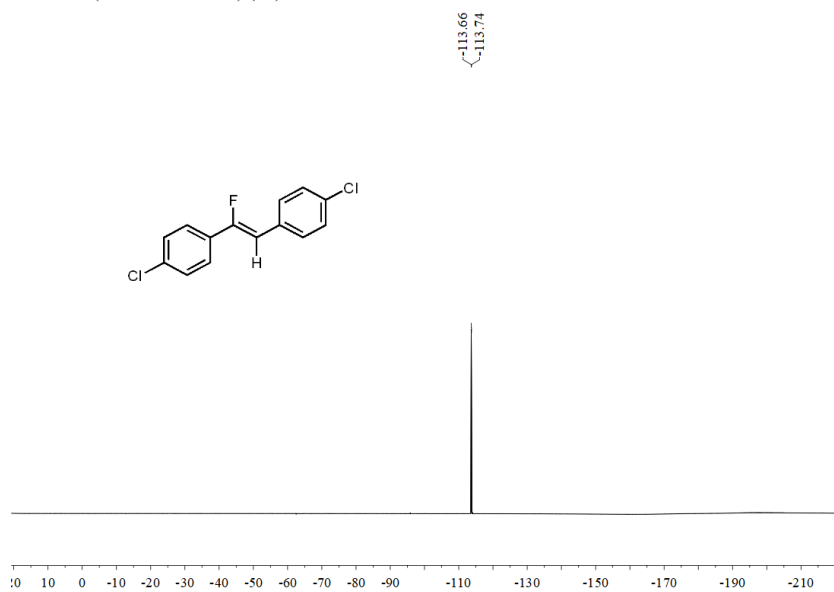

**<sup>1</sup>H NMR (500 MHz, CDCl<sub>3</sub>) (73)**

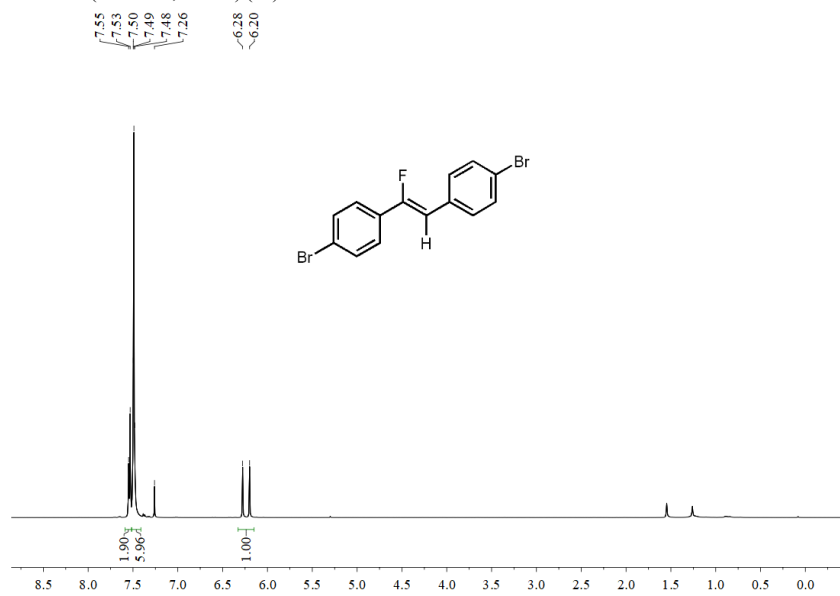

**<sup>13</sup>C NMR (126 MHz, CDCl<sub>3</sub>) (73)**

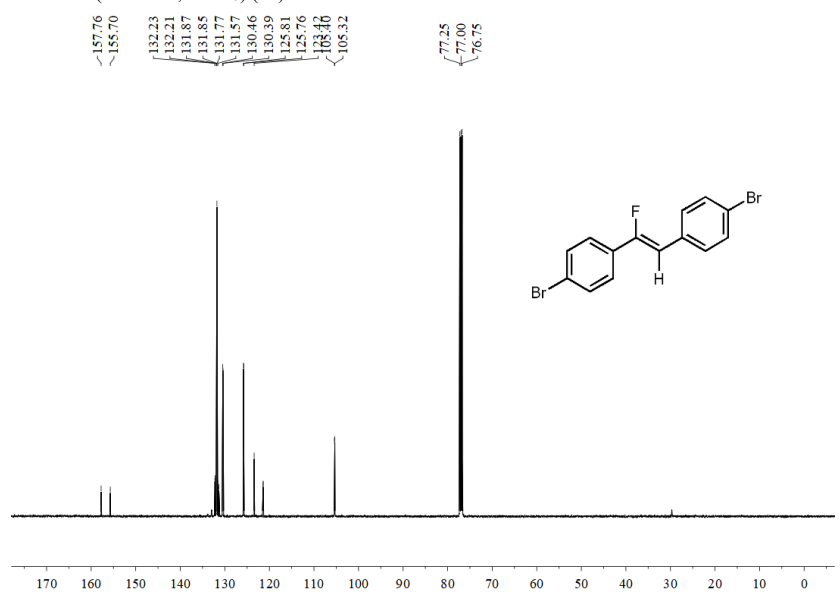

<sup>19</sup>F NMR (471 MHz, CDCl<sub>3</sub>) (73)

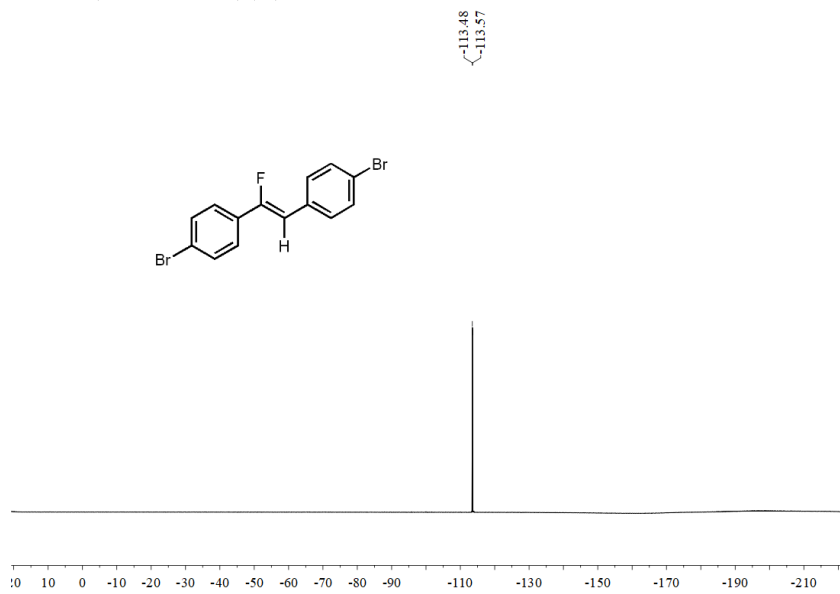

<sup>1</sup>H NMR (500 MHz, CDCl<sub>3</sub>) (75)

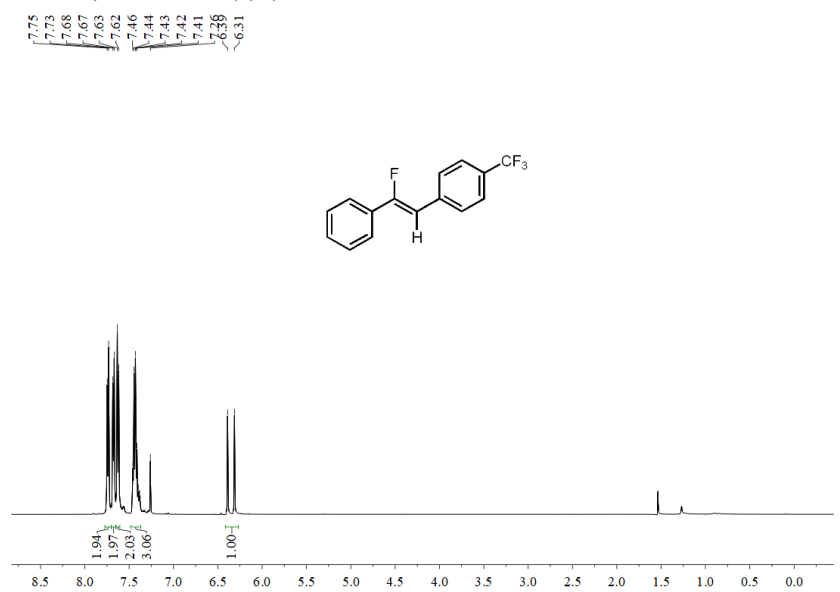

**<sup>13</sup>C NMR (126 MHz, CDCl<sub>3</sub>) (75)**

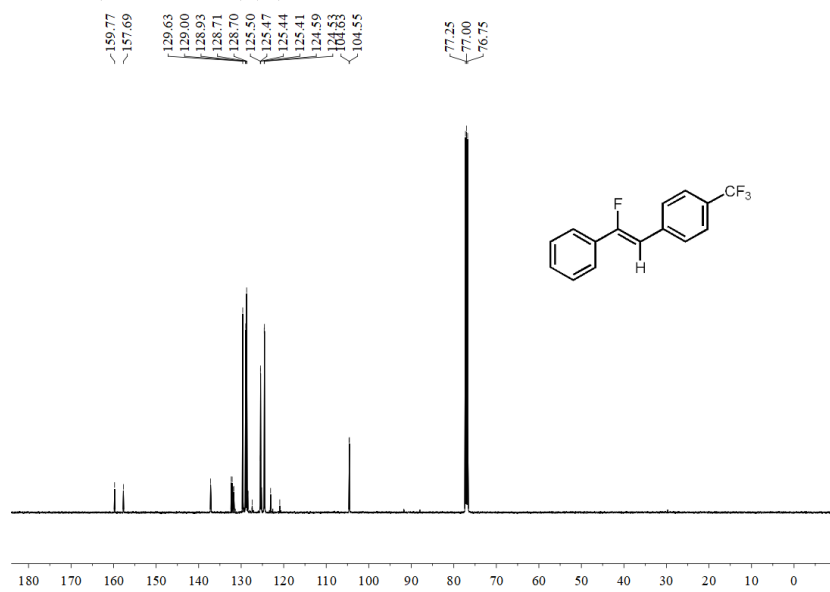

**<sup>19</sup>F NMR (471 MHz, CDCl<sub>3</sub>) (75)**

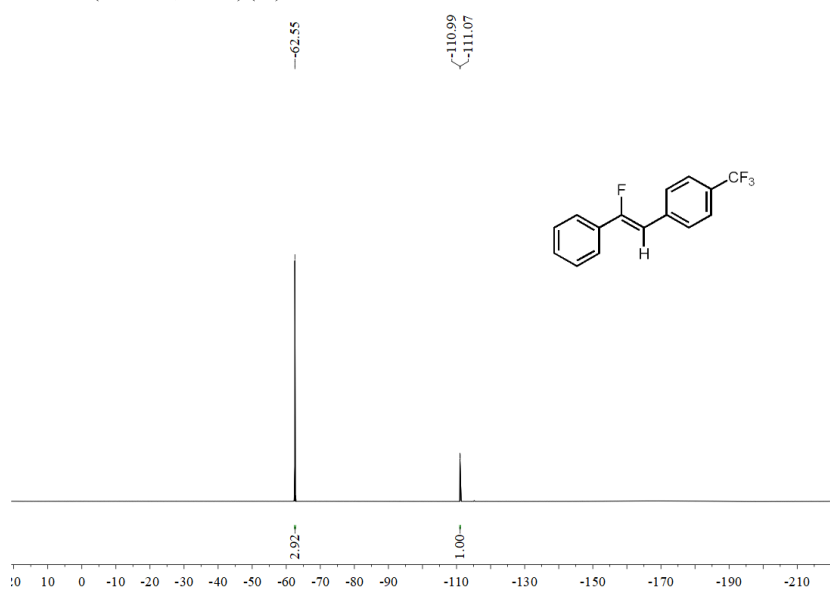

**<sup>1</sup>H NMR (500 MHz, CDCl<sub>3</sub>) (76)**

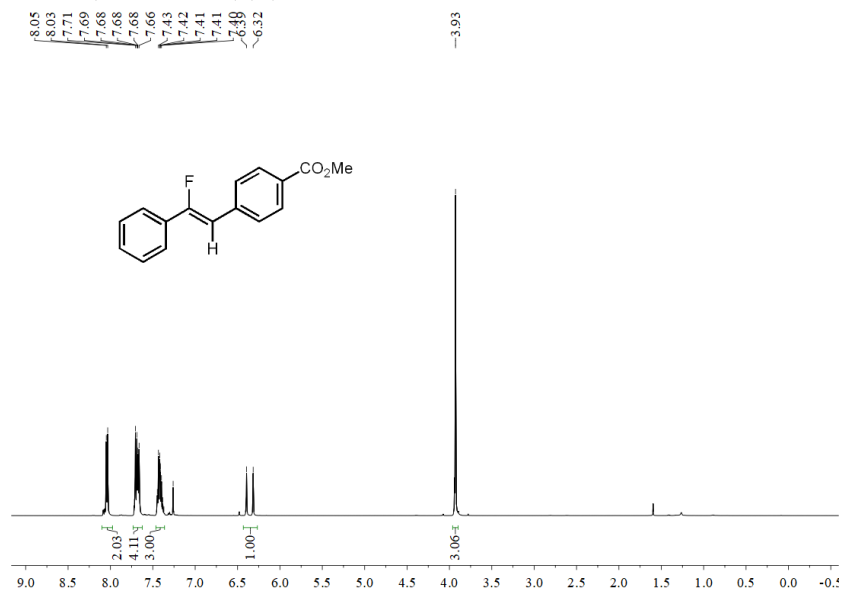

**<sup>13</sup>C NMR (126 MHz, CDCl<sub>3</sub>) (76)**

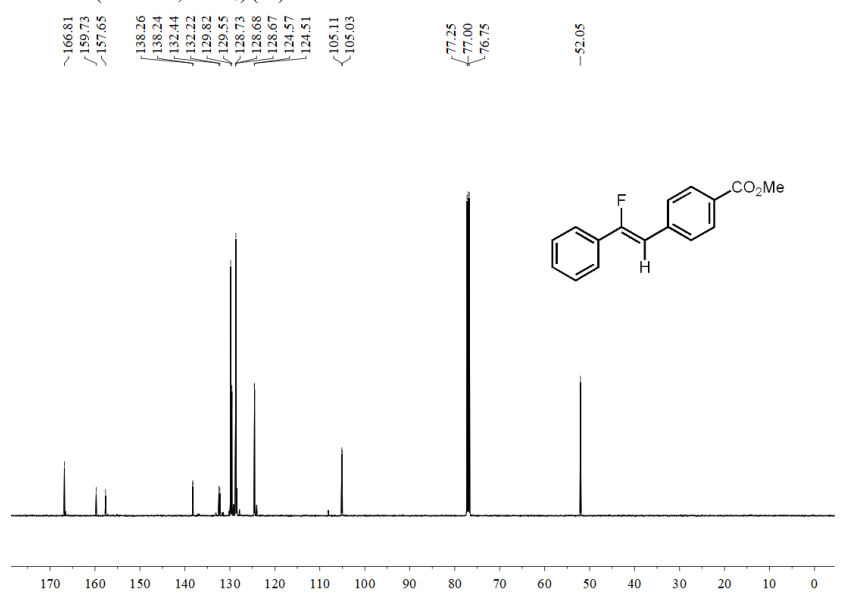

<sup>19</sup>F NMR (471 MHz, CDCl<sub>3</sub>) (76)

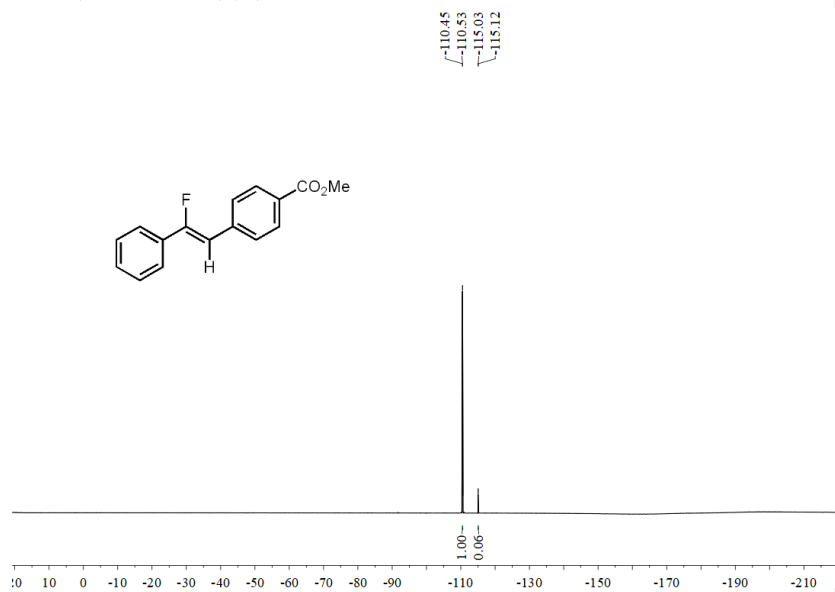

<sup>1</sup>H NMR (500 MHz, CDCl<sub>3</sub>) (78)

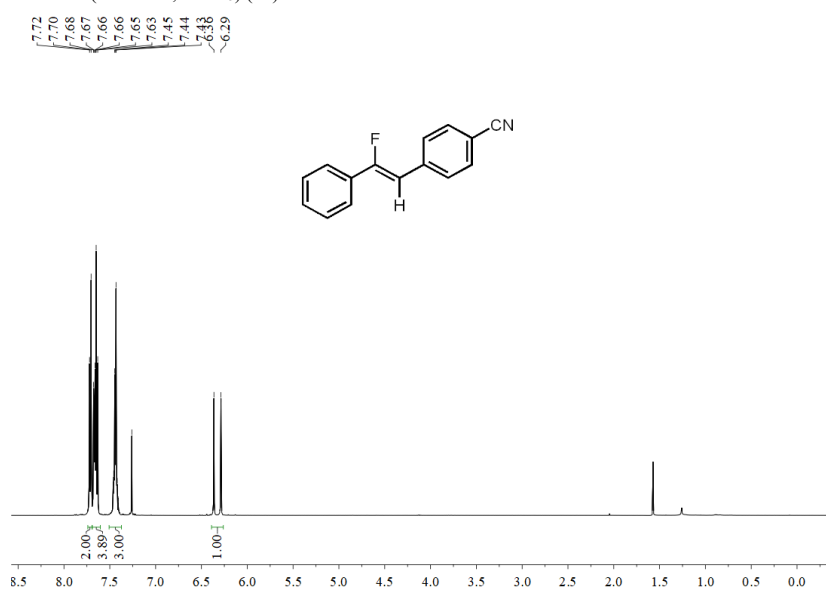



**<sup>13</sup>C NMR (126 MHz, CDCl<sub>3</sub>) (78)**

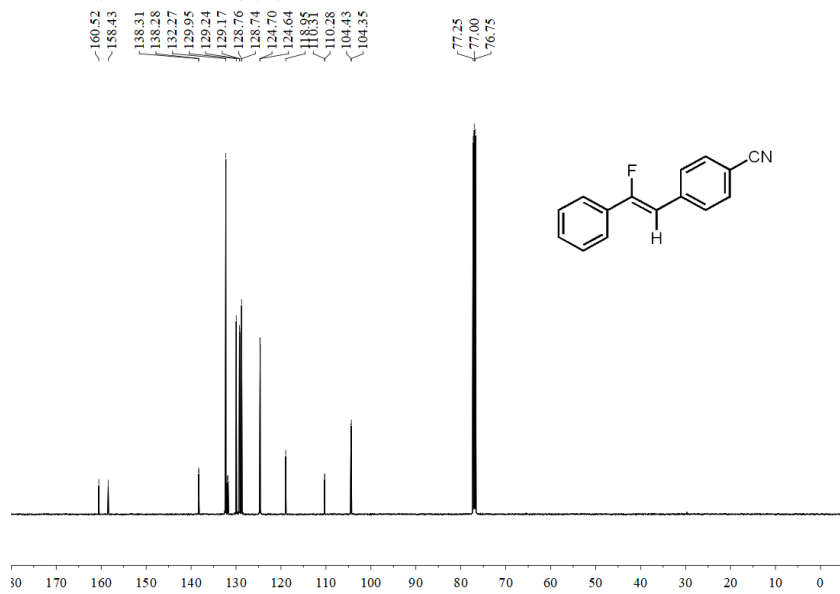

**<sup>19</sup>F NMR (471 MHz, CDCl<sub>3</sub>) (78)**

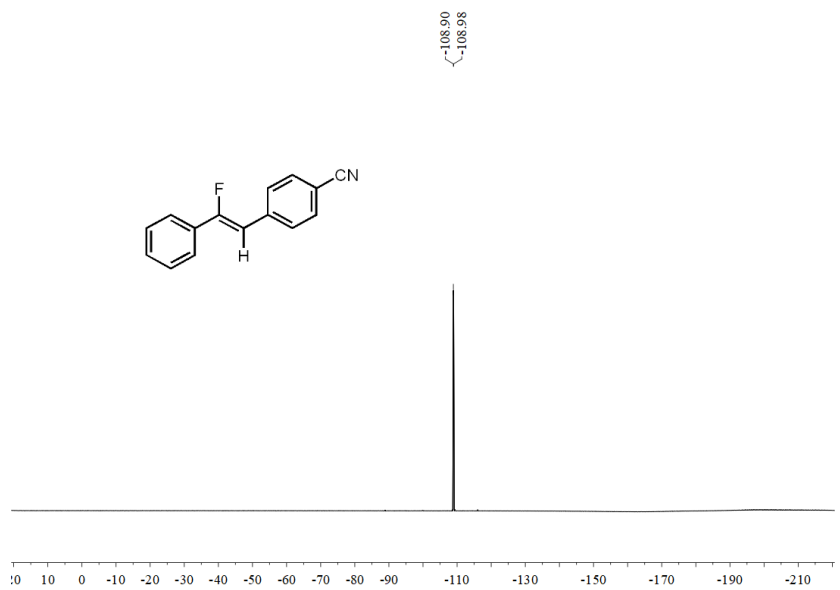

**<sup>1</sup>H NMR (500 MHz, CDCl<sub>3</sub>) (79)**

8.24  
8.22  
7.78  
7.76  
7.46  
7.44  
7.35  
6.35

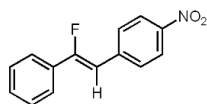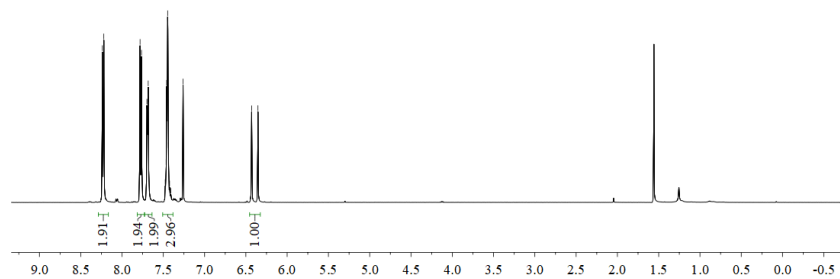

**<sup>13</sup>C NMR (126 MHz, CDCl<sub>3</sub>) (79)**

160.94  
158.84  
146.27  
140.36  
140.34  
130.15  
129.26  
128.82  
128.81  
124.82  
124.75  
108.71  
104.04  
77.25  
77.06  
76.75

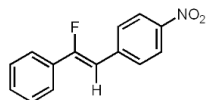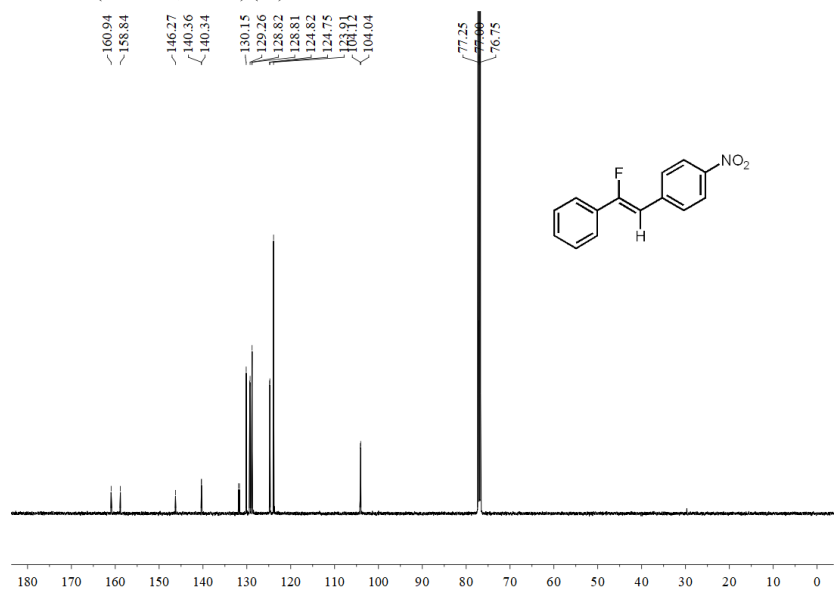

<sup>19</sup>F NMR (471 MHz, CDCl<sub>3</sub>) (79)

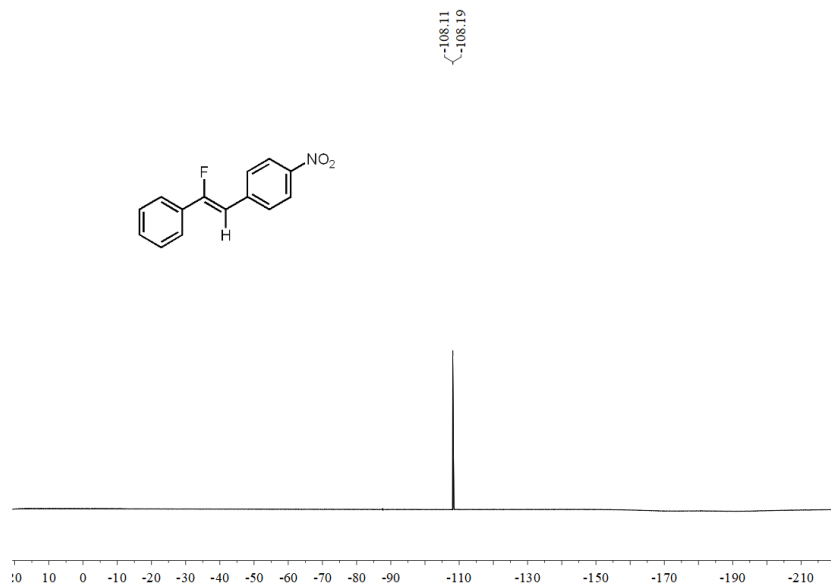

<sup>1</sup>H NMR (500 MHz, CDCl<sub>3</sub>) (80)

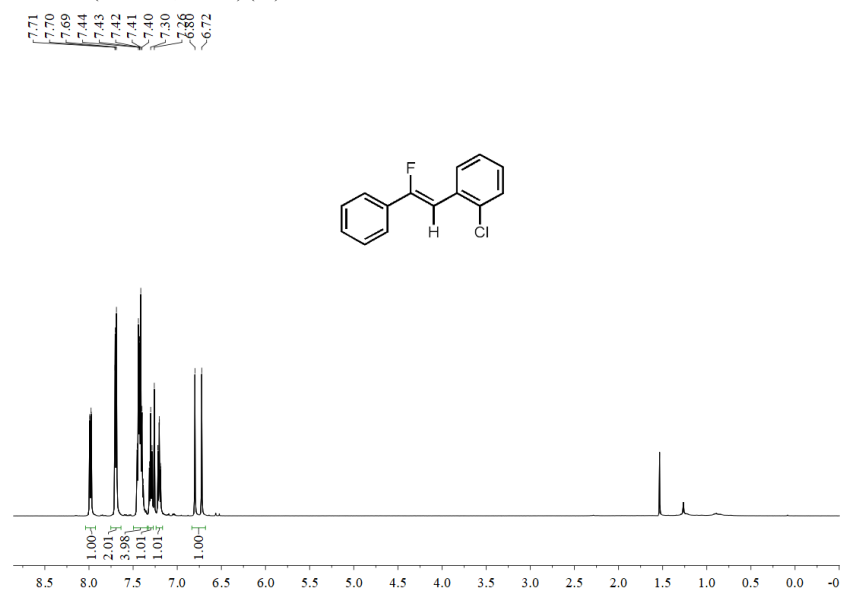

**<sup>13</sup>C NMR (126 MHz, CDCl<sub>3</sub>) (80)**

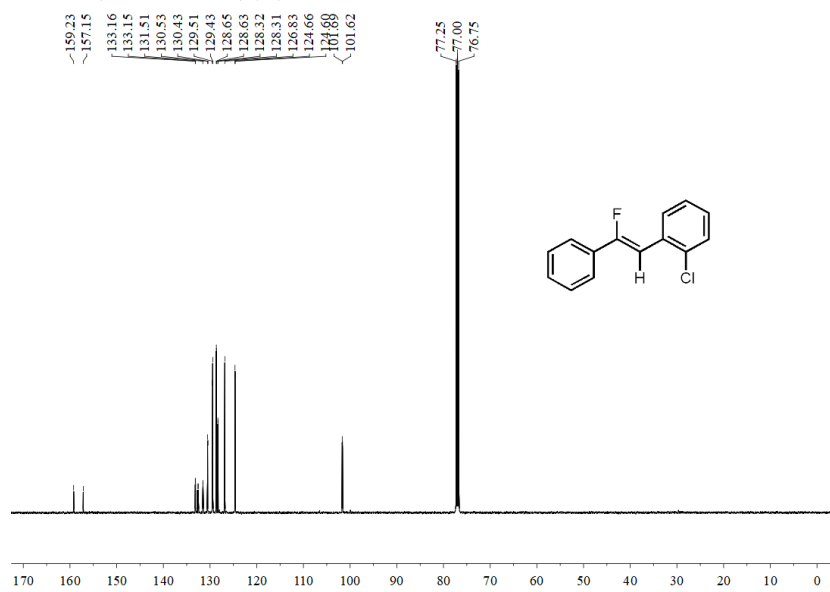

**<sup>19</sup>F NMR (471 MHz, CDCl<sub>3</sub>) (80)**

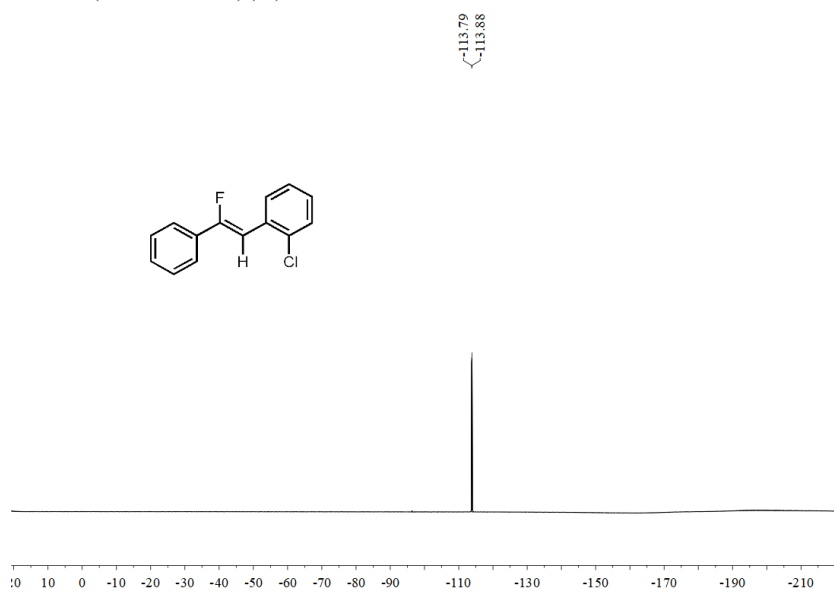

**<sup>1</sup>H NMR (500 MHz, CDCl<sub>3</sub>) (85)**

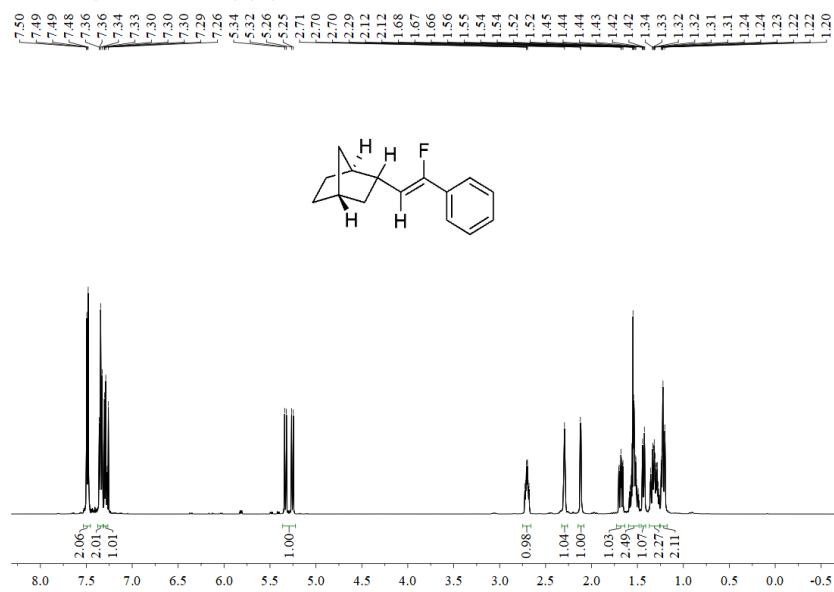

**<sup>13</sup>C NMR (126 MHz, CDCl<sub>3</sub>) (85)**

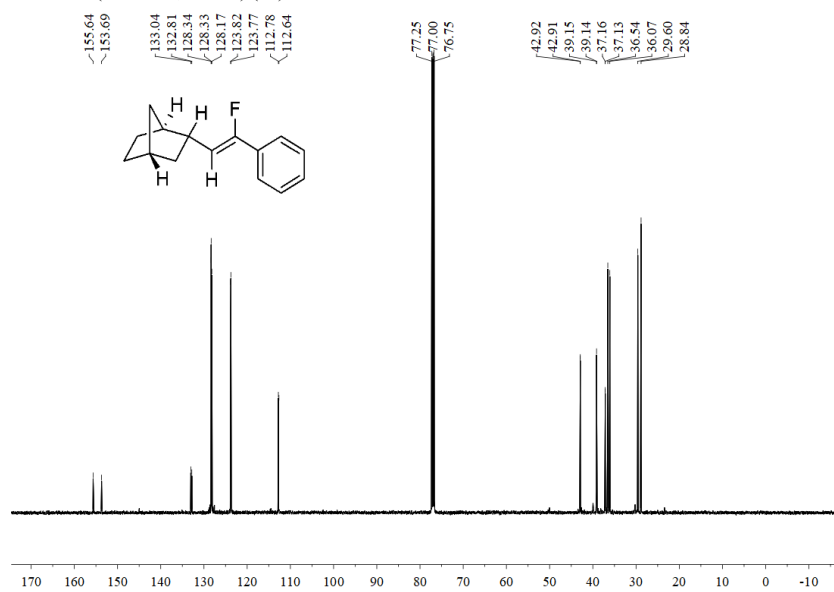

$^{19}\text{F}$  NMR (471 MHz,  $\text{CDCl}_3$ ) (85)

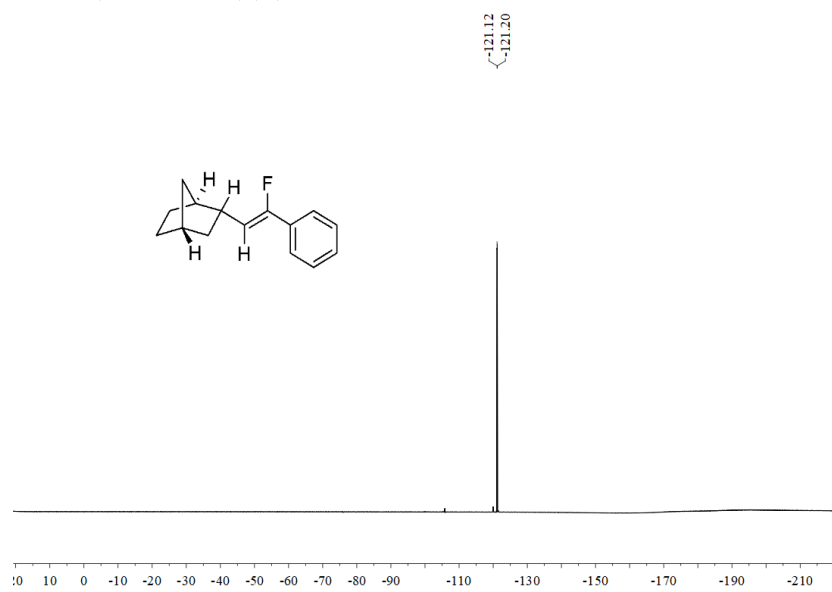

$^1\text{H}$  NMR (500 MHz,  $\text{CDCl}_3$ ) (86)

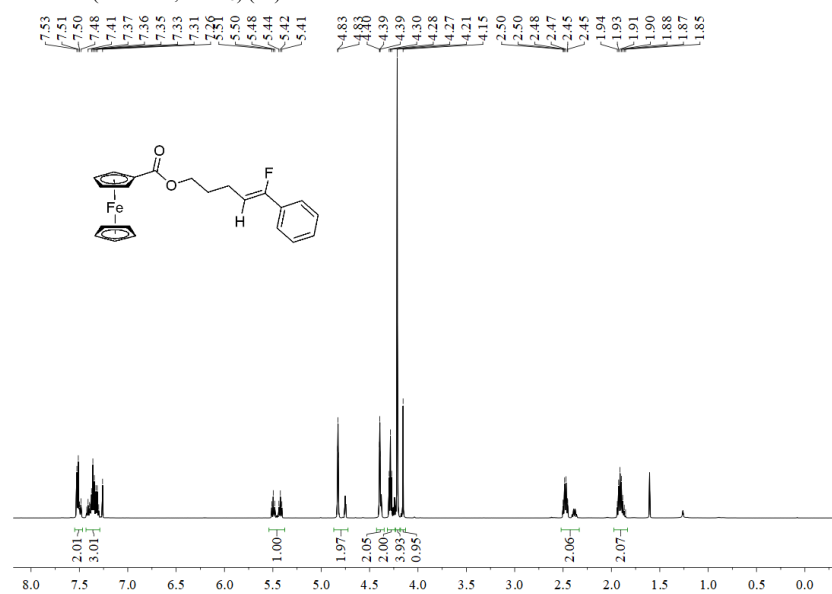

**<sup>13</sup>C NMR (126 MHz, CDCl<sub>3</sub>) (86)**

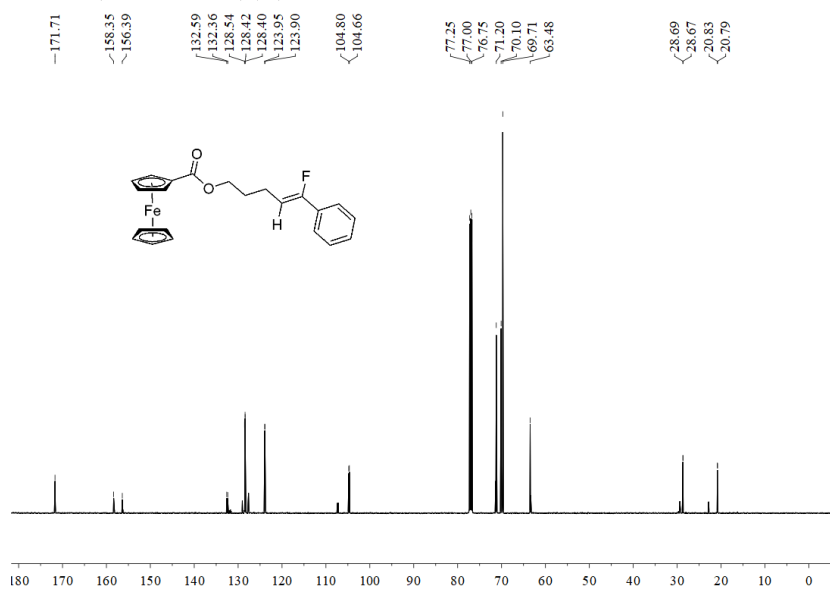

**<sup>19</sup>F NMR (471 MHz, CDCl<sub>3</sub>) (86)**

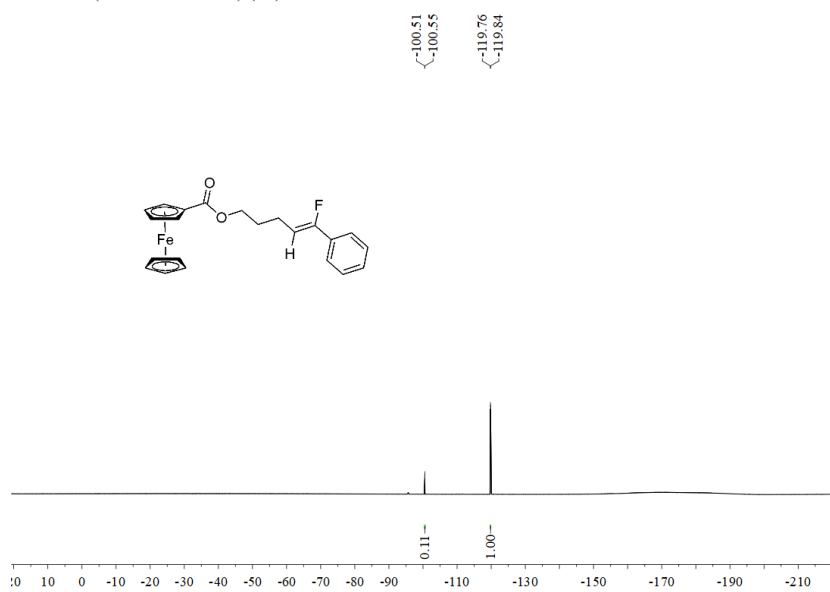

**<sup>1</sup>H NMR (500 MHz, CDCl<sub>3</sub>) (87)**

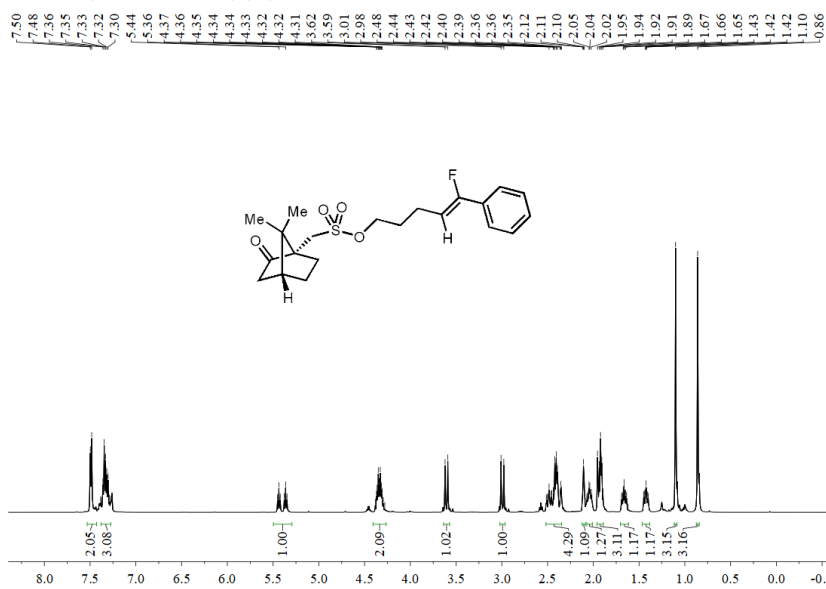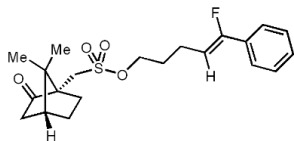

**<sup>13</sup>C NMR (126 MHz, CDCl<sub>3</sub>) (87)**

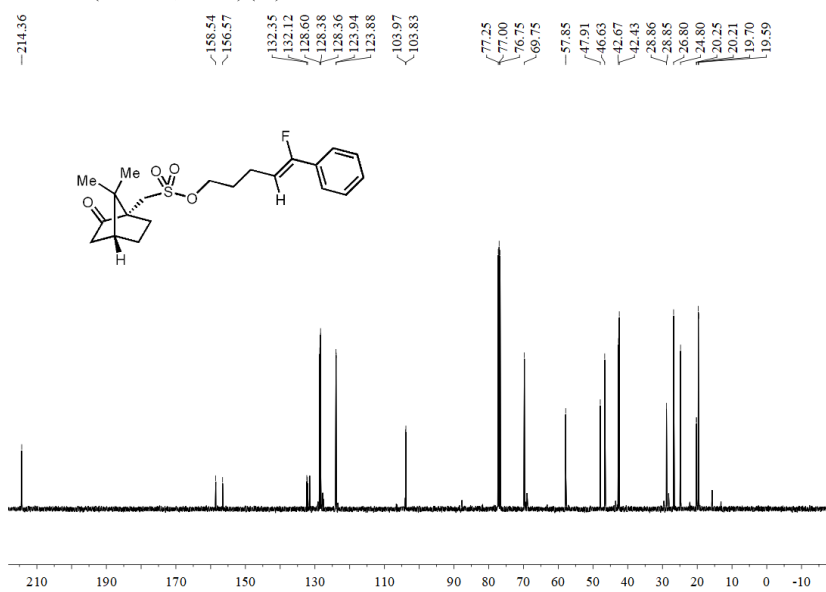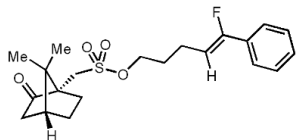



<sup>19</sup>F NMR (471 MHz, CDCl<sub>3</sub>) (87)

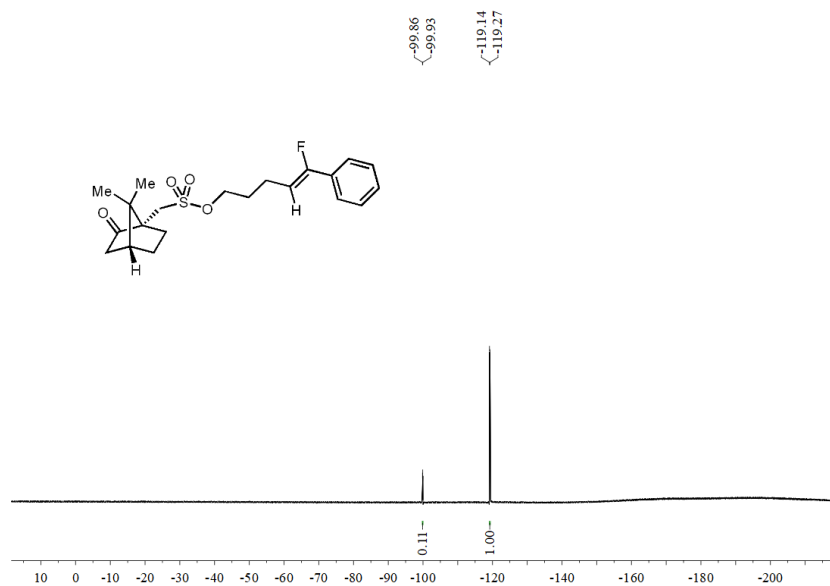

<sup>1</sup>H NMR (500 MHz, CDCl<sub>3</sub>) (88)

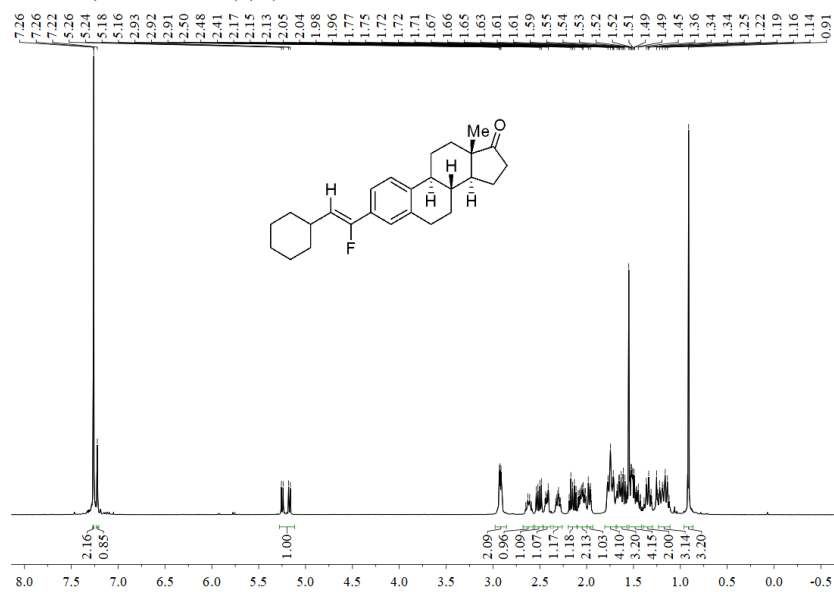

<sup>13</sup>C NMR (126 MHz, CDCl<sub>3</sub>) (88)

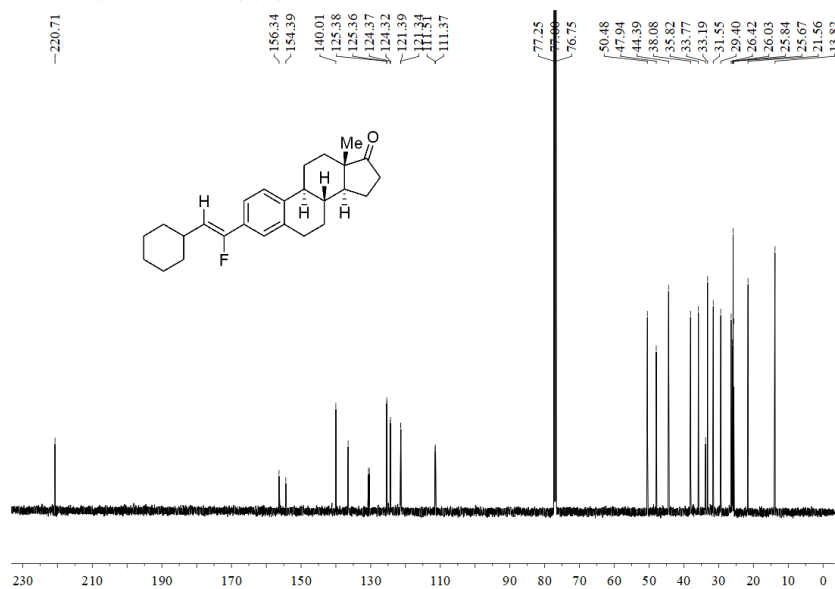

<sup>19</sup>F NMR (471 MHz, CDCl<sub>3</sub>) (88)

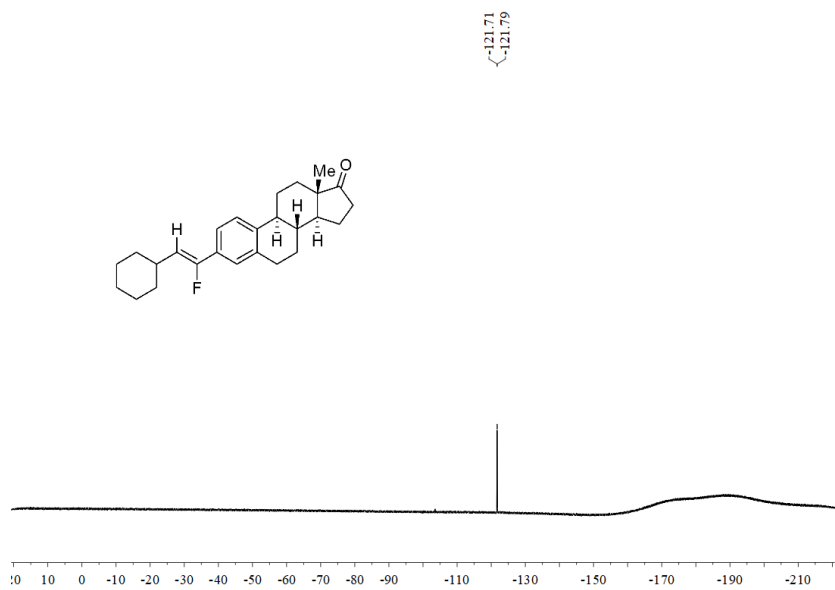

**<sup>1</sup>H NMR (500 MHz, CDCl<sub>3</sub>) (89)**

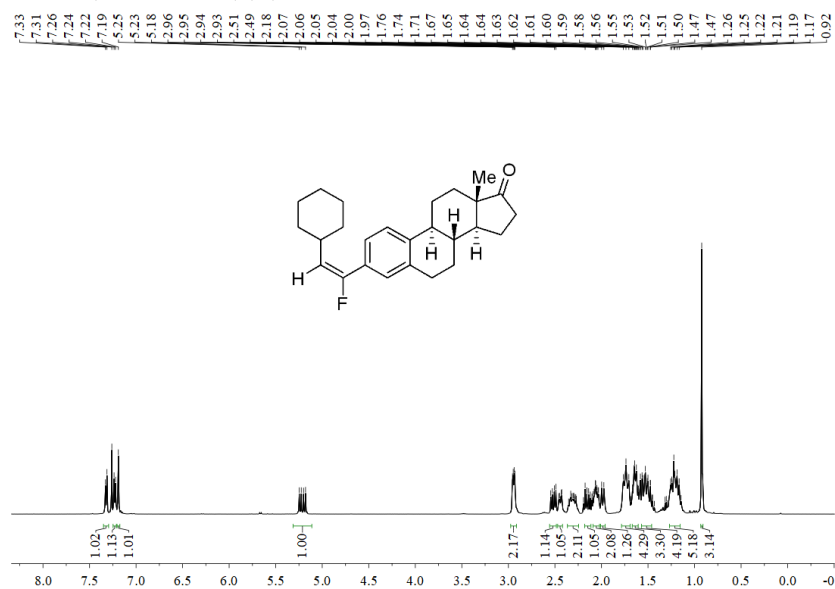

**<sup>13</sup>C NMR (126 MHz, CDCl<sub>3</sub>) (89)**

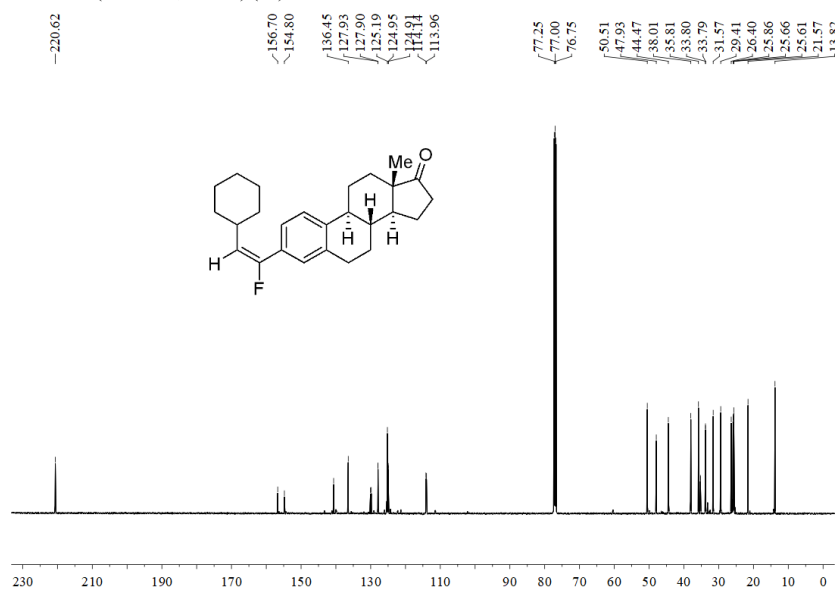

<sup>19</sup>F NMR (471 MHz, CDCl<sub>3</sub>) (89)

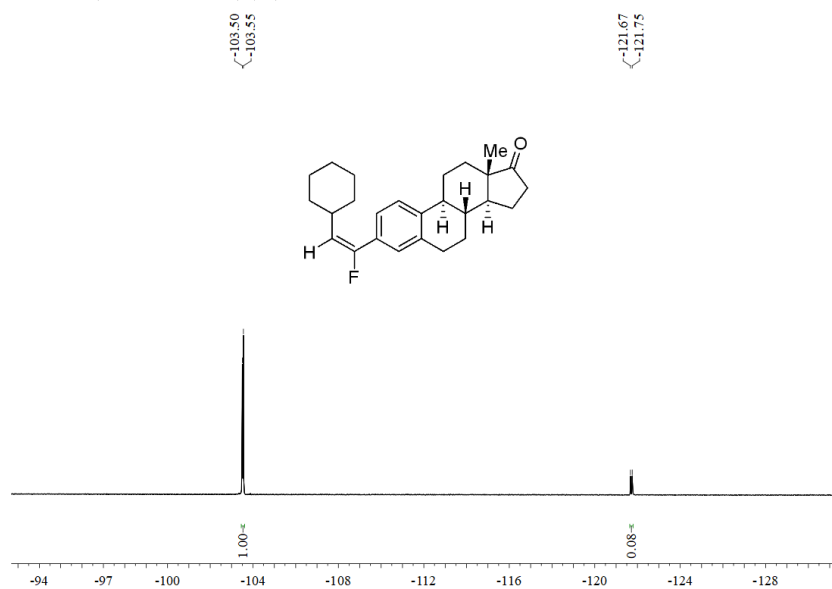

<sup>1</sup>H NMR (500 MHz, CDCl<sub>3</sub>) (90)

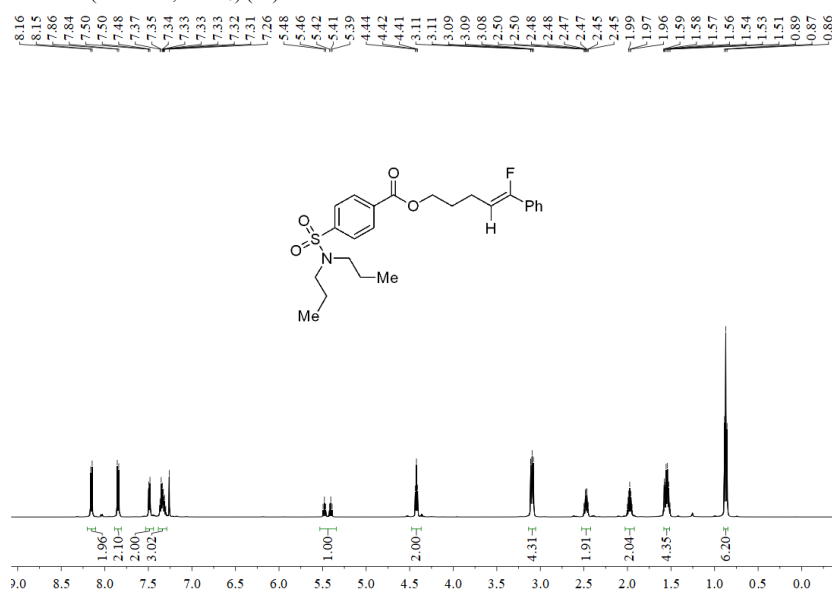

<sup>13</sup>C NMR (126 MHz, CDCl<sub>3</sub>) (90)

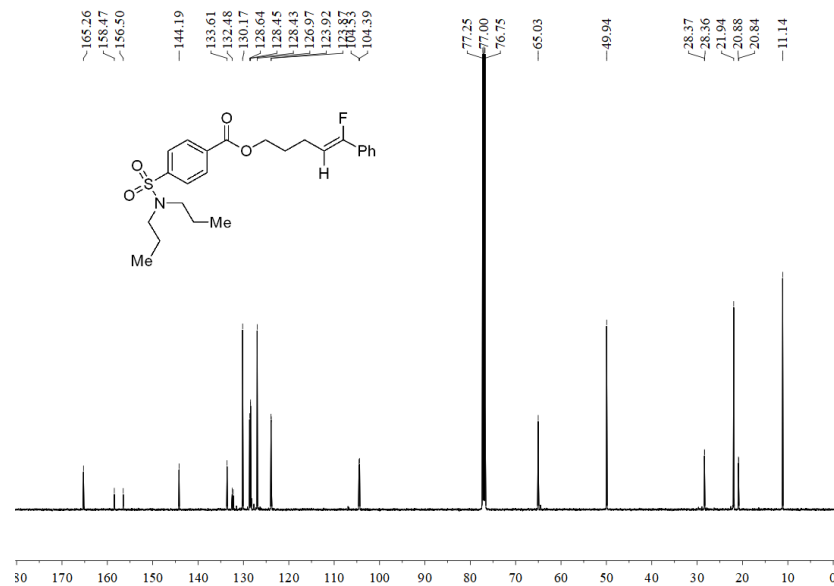

<sup>19</sup>F NMR (471 MHz, CDCl<sub>3</sub>) (90)

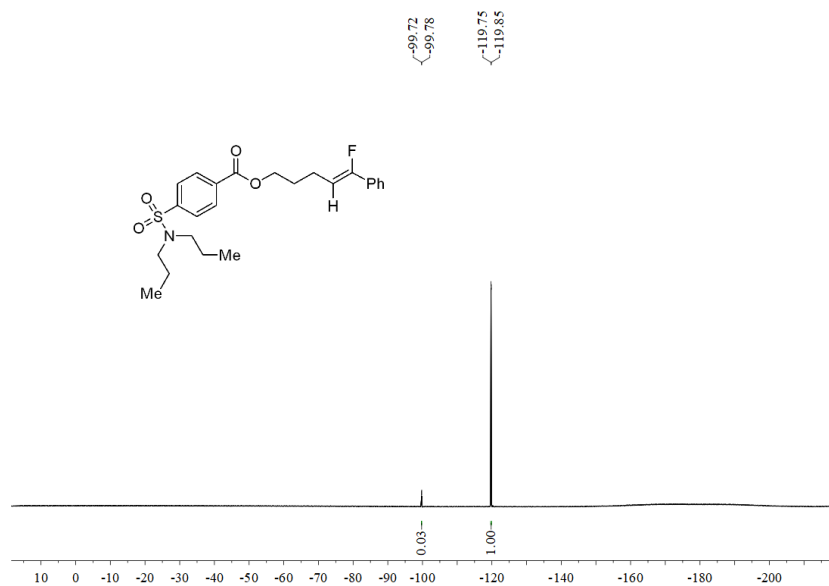

**<sup>1</sup>H NMR (500 MHz, CDCl<sub>3</sub>) (91)**

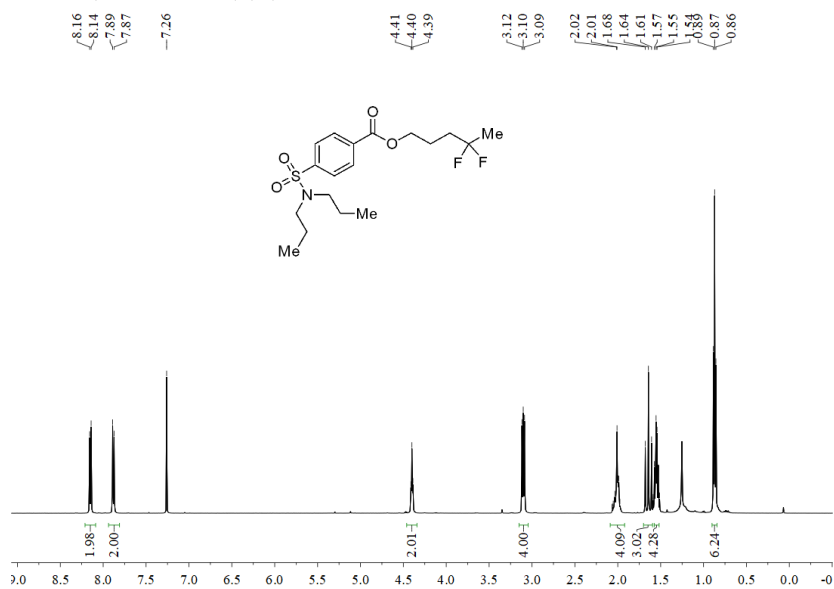

**<sup>13</sup>C NMR (126 MHz, CDCl<sub>3</sub>) (91)**

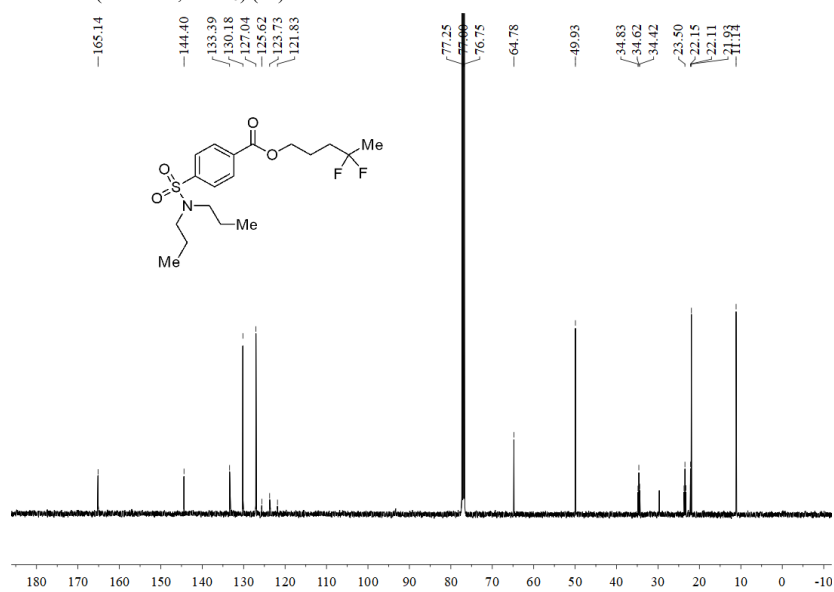

<sup>19</sup>F NMR (471 MHz, CDCl<sub>3</sub>) (91)

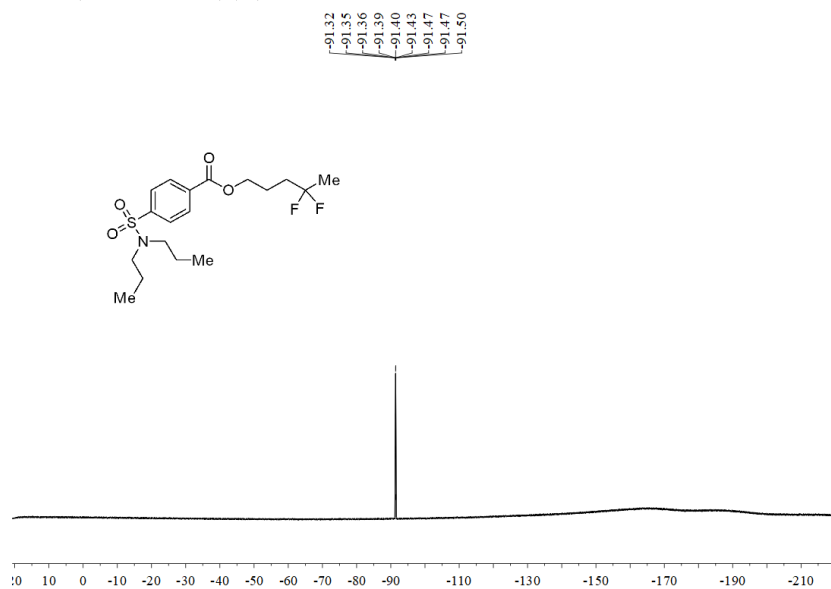

<sup>1</sup>H NMR (500 MHz, CDCl<sub>3</sub>) (92)

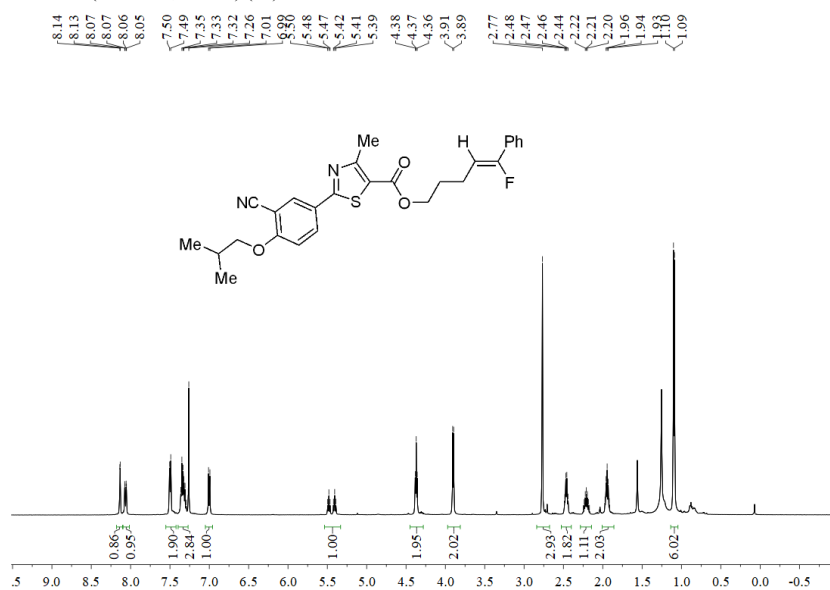

<sup>13</sup>C NMR (126 MHz, CDCl<sub>3</sub>) (92)

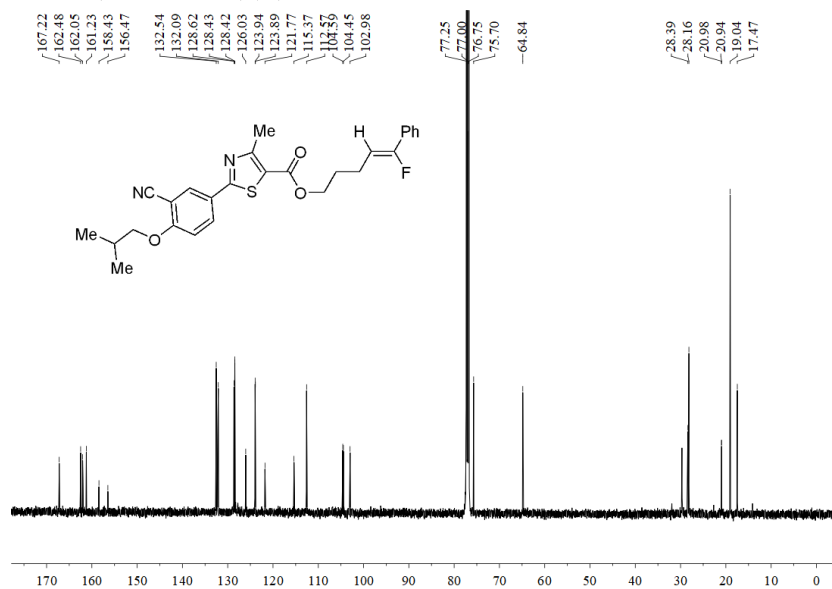

<sup>19</sup>F NMR (471 MHz, CDCl<sub>3</sub>) (92)

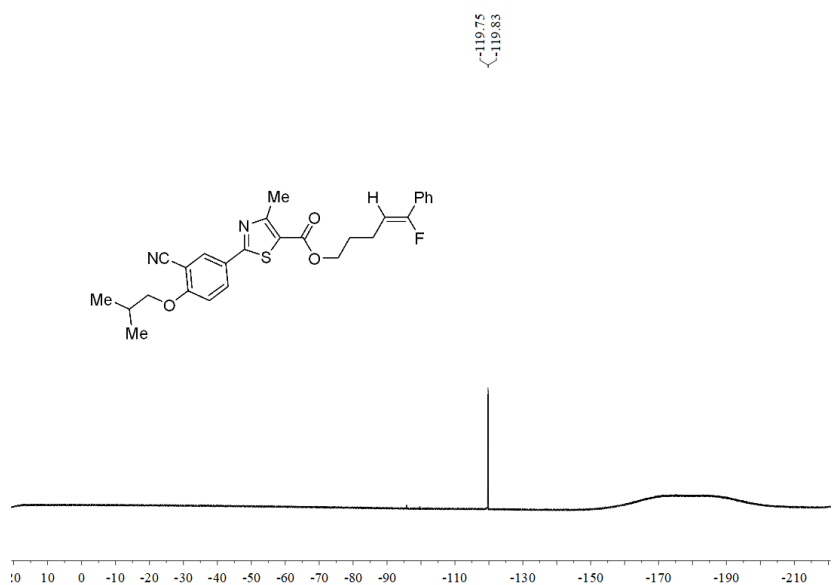



**<sup>1</sup>H NMR (500 MHz, CDCl<sub>3</sub>) (93)**

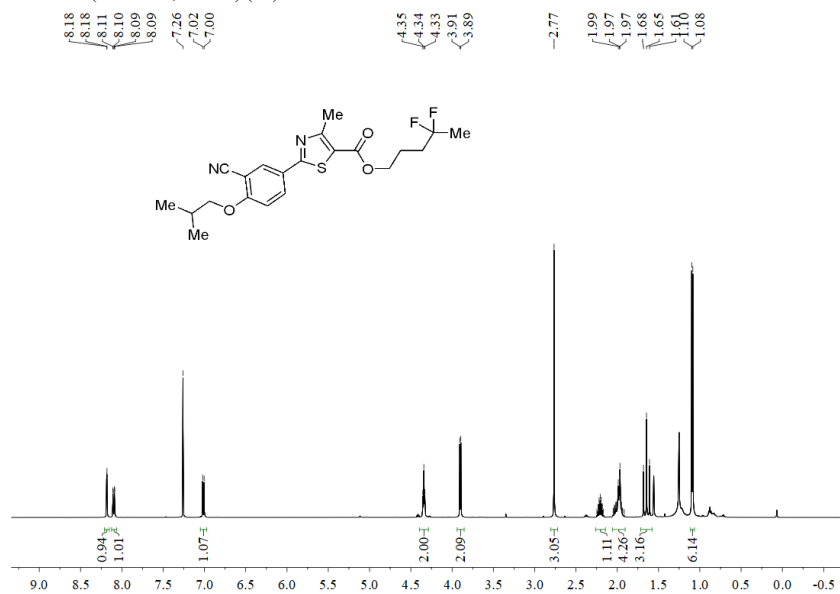

**<sup>13</sup>C NMR (126 MHz, CDCl<sub>3</sub>) (93)**

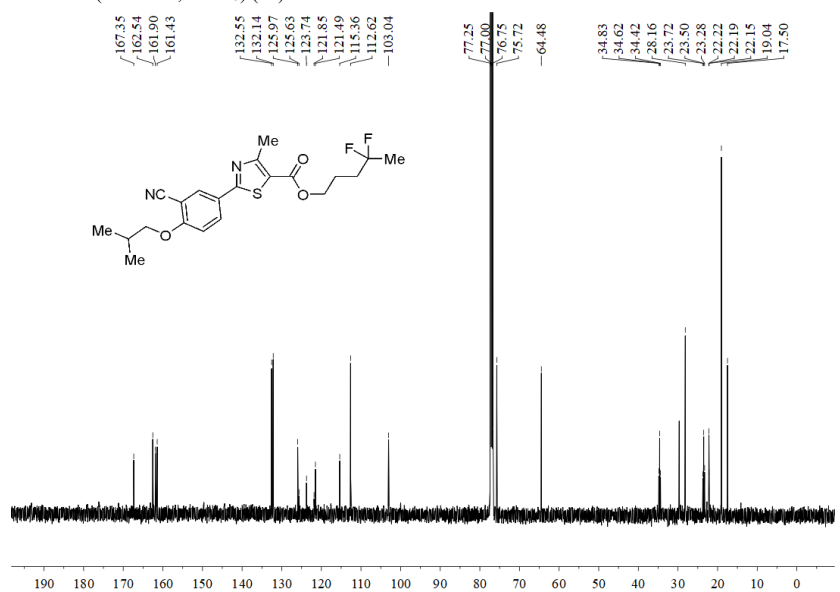

<sup>19</sup>F NMR (471 MHz, CDCl<sub>3</sub>) (93)

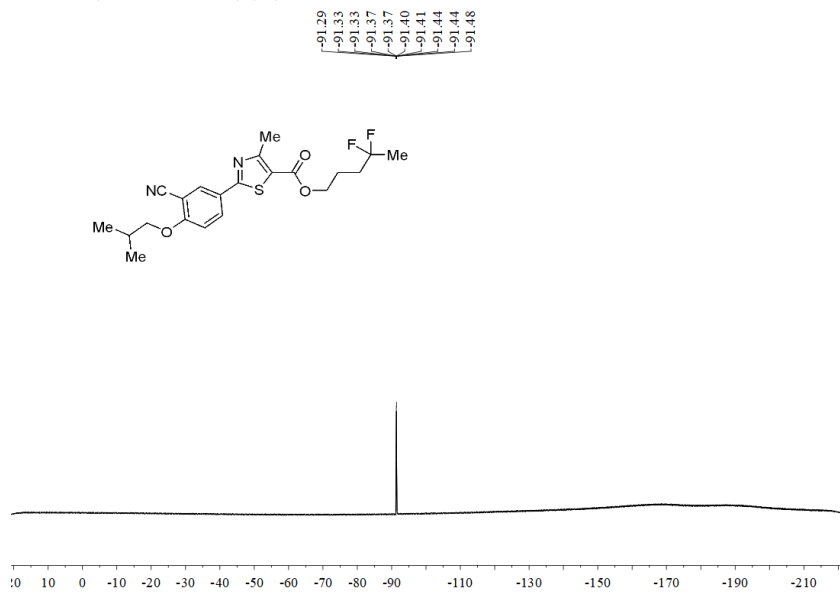

<sup>1</sup>H NMR (500 MHz, CDCl<sub>3</sub>) (94)

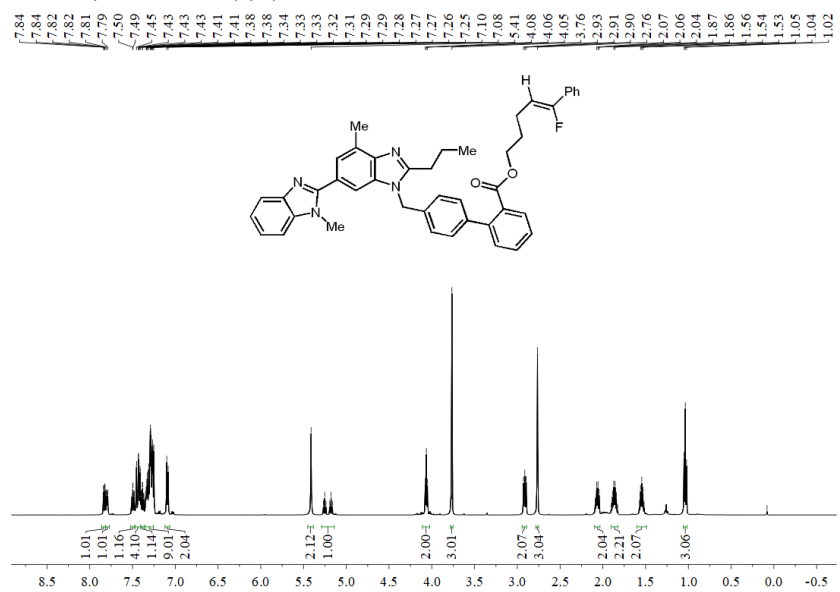

**<sup>13</sup>C NMR (126 MHz, CDCl<sub>3</sub>) (94)**

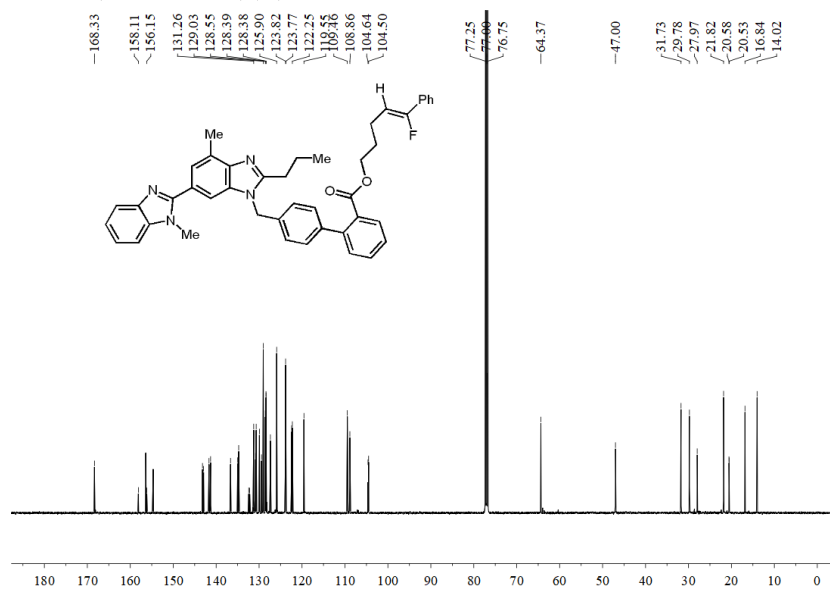

**<sup>19</sup>F NMR (471 MHz, CDCl<sub>3</sub>) (94)**

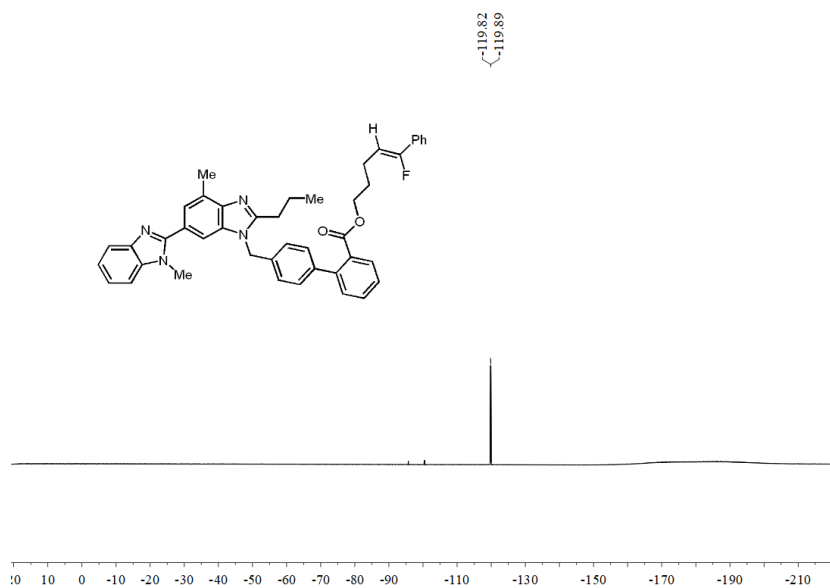

**<sup>1</sup>H NMR (500 MHz, CDCl<sub>3</sub>) (95)**

7.50  
7.48  
7.37  
7.35  
7.34  
7.31  
7.30  
7.30  
7.29  
7.28  
7.26  
5.50  
5.48  
5.47  
5.45  
5.42  
5.41  
5.39  
5.38

1.83  
1.82  
1.81  
1.81

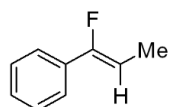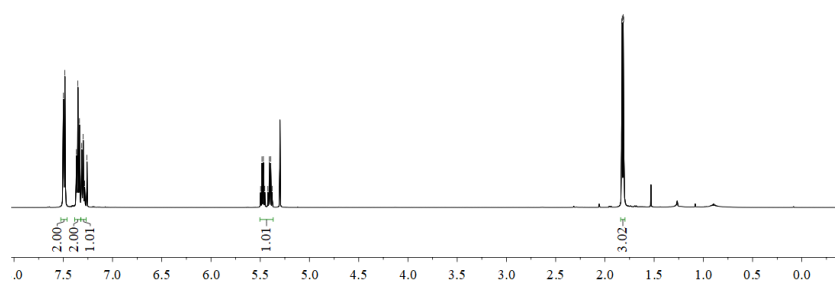

**<sup>13</sup>C NMR (126 MHz, CDCl<sub>3</sub>) (95)**

158.31  
156.36  
132.99  
132.76  
128.37  
128.36  
128.24  
123.76  
123.71  
100.69  
100.54

77.25  
77.00  
76.75

9.43  
9.37

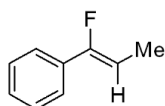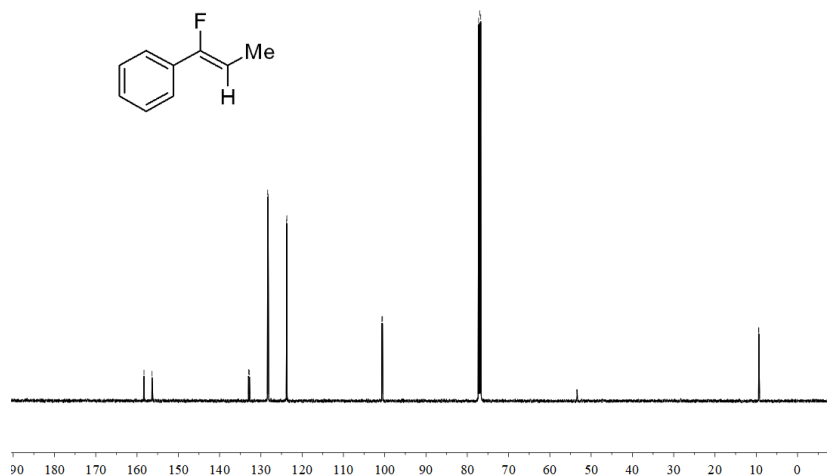

<sup>19</sup>F NMR (471 MHz, CDCl<sub>3</sub>) (95)

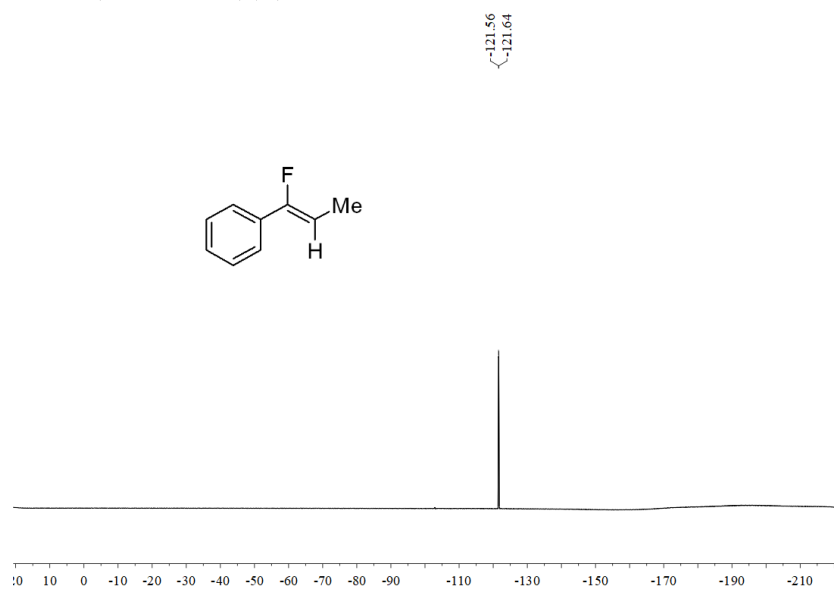

<sup>1</sup>H NMR (500 MHz, CDCl<sub>3</sub>) (97)

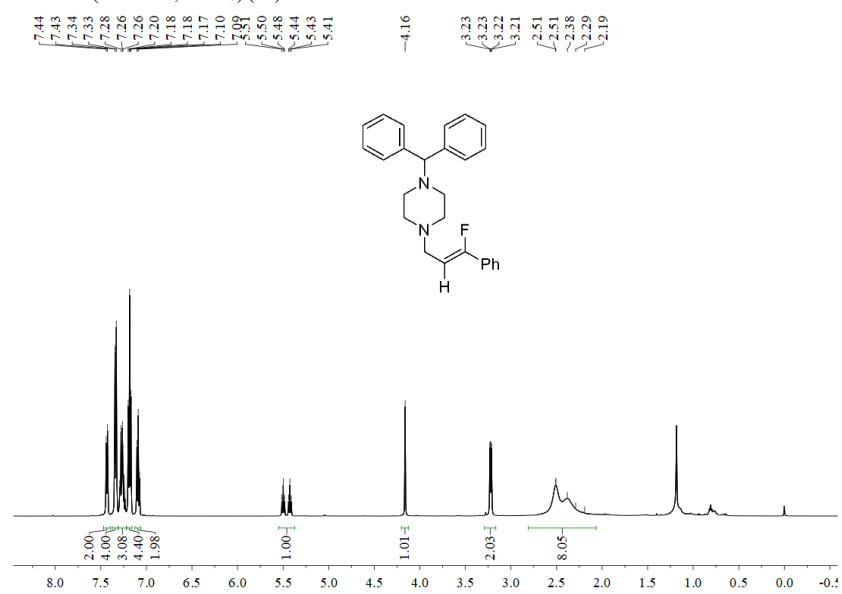

<sup>13</sup>C NMR (126 MHz, CDCl<sub>3</sub>) (97)

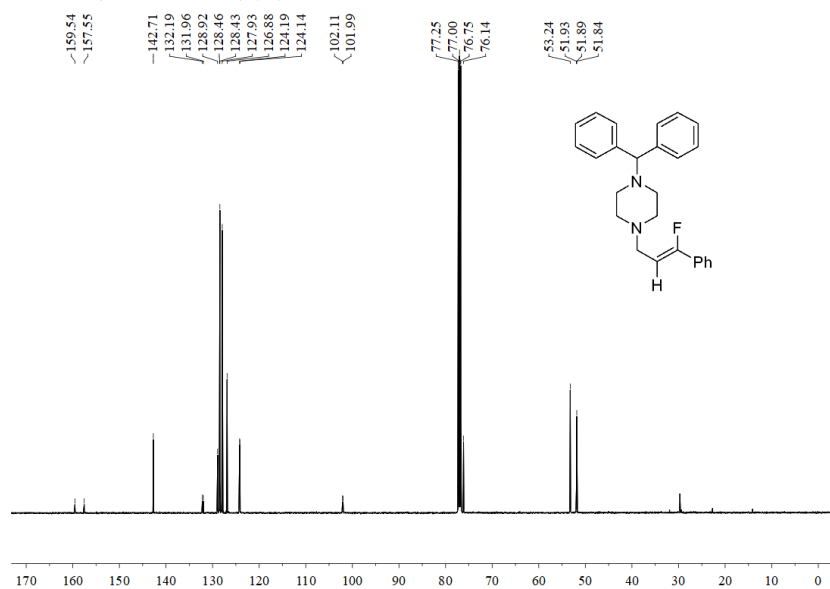

<sup>19</sup>F NMR (471 MHz, CDCl<sub>3</sub>) (97)

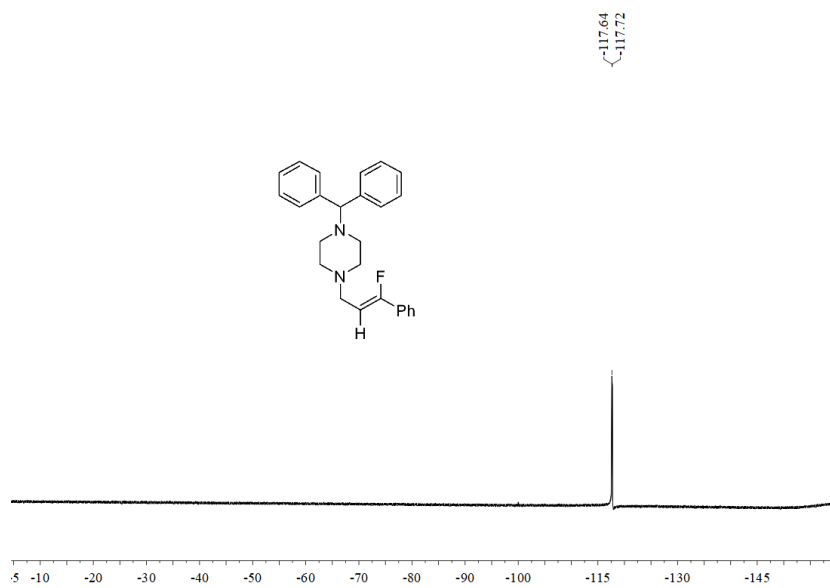

**<sup>1</sup>H NMR (500 MHz, CDCl<sub>3</sub>) (98)**

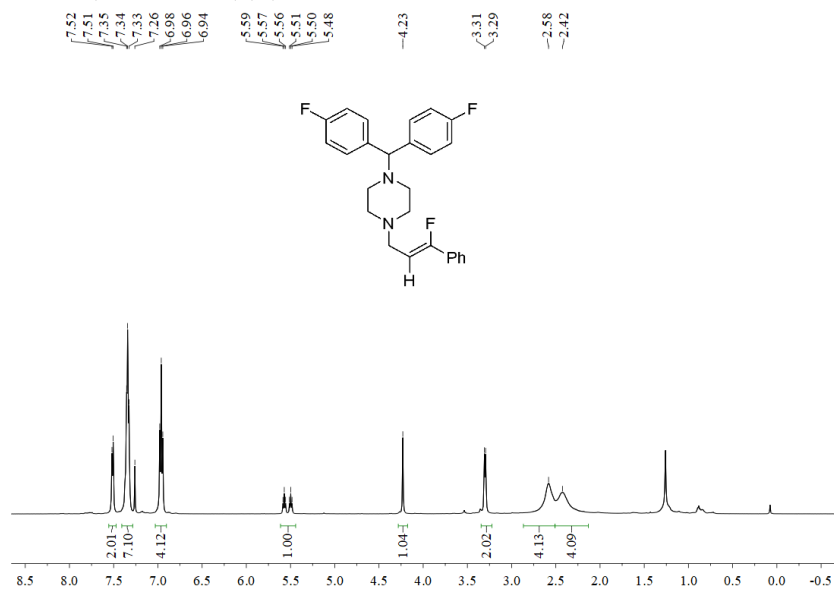

**<sup>13</sup>C NMR (126 MHz, CDCl<sub>3</sub>) (98)**

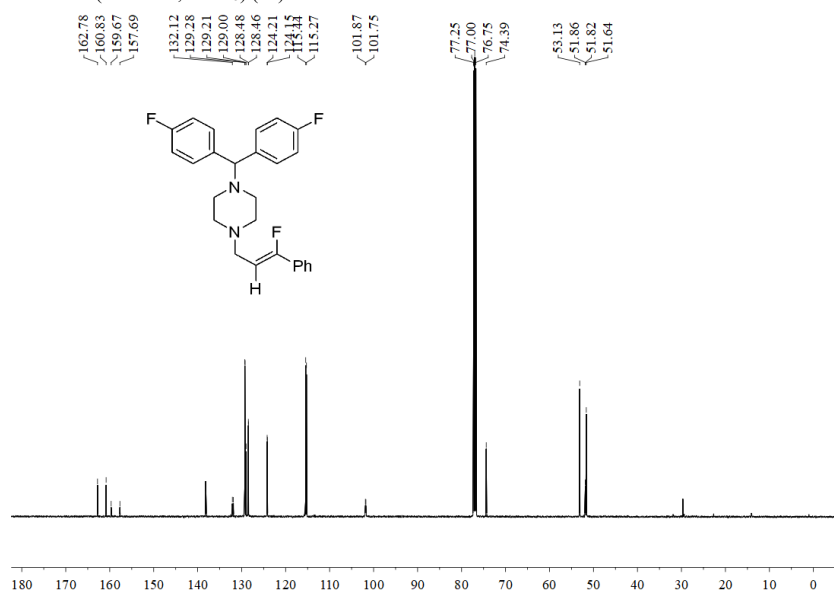

<sup>19</sup>F NMR (471 MHz, CDCl<sub>3</sub>) (98)

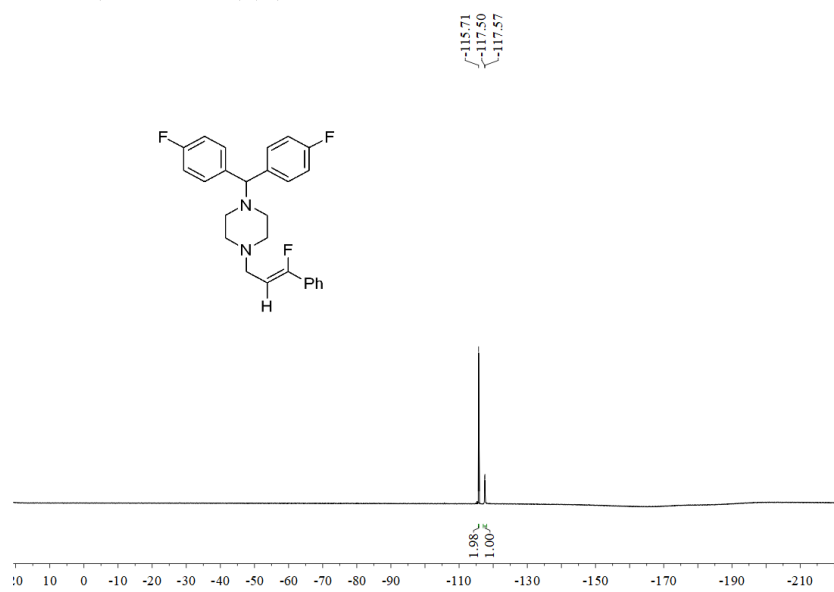

<sup>1</sup>H NMR (500 MHz, CDCl<sub>3</sub>) (100)

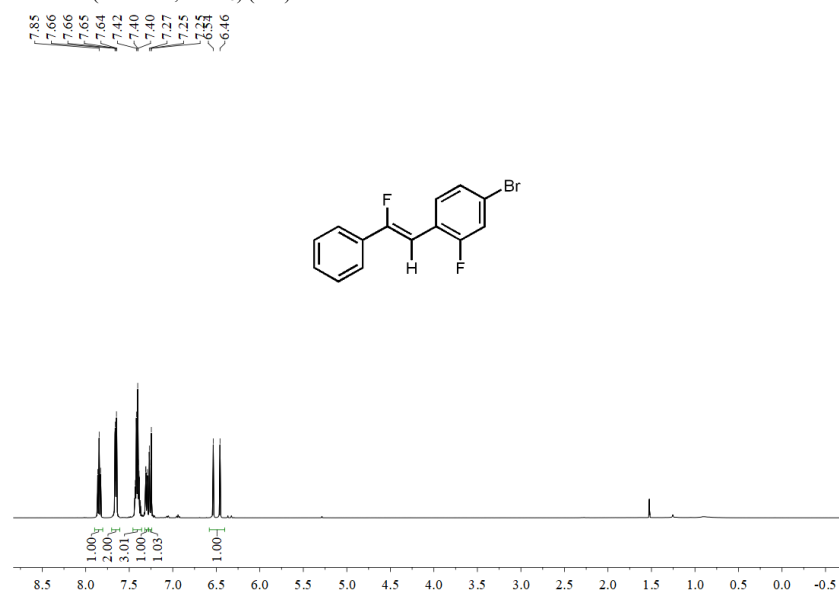



**<sup>13</sup>C NMR (126 MHz, CDCl<sub>3</sub>) (100)**

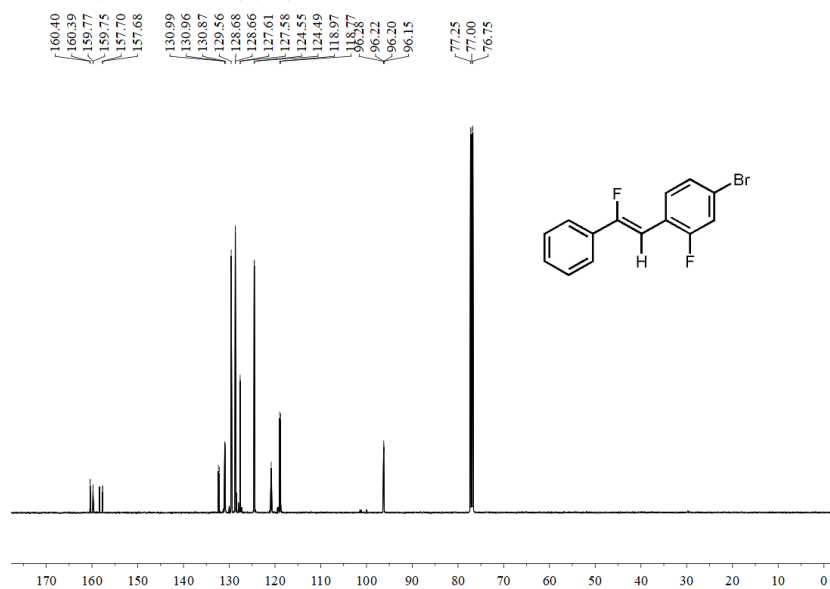

**<sup>19</sup>F NMR (471 MHz, CDCl<sub>3</sub>) (100)**

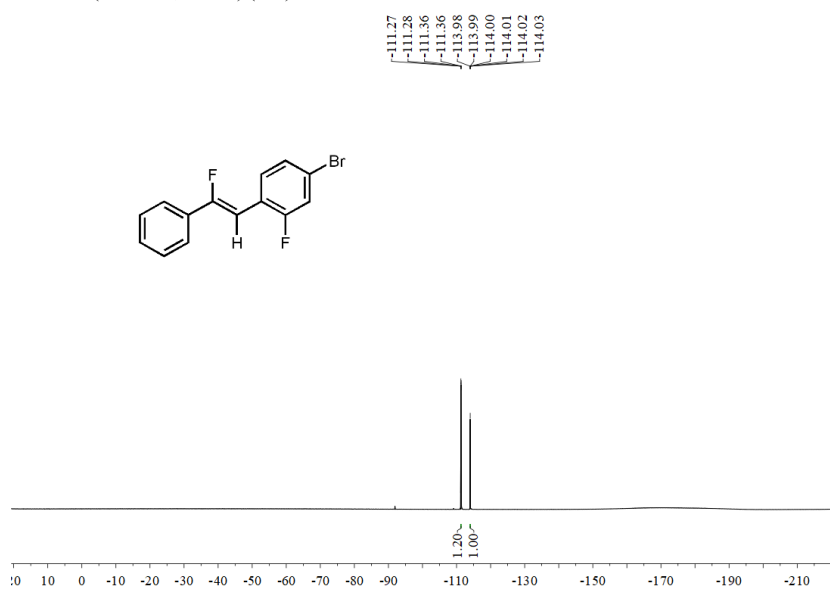

Supplement: NIHMS1616744-supplement-Supporting_Information.pdf [file NIHMS1616744-supplement-Supporting_Information.pdf]
